# Supplementary material for: A naturally occurring variant of MBD4 causes maternal germline hypermutation in primates
Source: Genome Res. 2023 Dec;33(12):2053–9. doi: 10.1101/gr.277977.123 (PMC10760519; doi:10.1101/gr.277977.123)
Supplement: Supplement 2 [file Supplemental_Tables.xlsx]

## Sheet: Overview
Supplementary Table Overview
All coordinates are with respect to MMul10
Table S1	Trio summary information, including demographic information on each trio, as well as the number of callable bases per genome, and a detailed accounting of mendelian errors detected in each family and the numbers removed at each step of filtering.
Table S2	Phased Variants by PhaseMyDeNovo
Table S3	Candidate genes for hypermutator phenotype (referred to as "genes of interest" (GOI)
Table S4	High and Moderate impact variants within the genes of interest (GOI) genes. Impact is determined based on VEP annotation.
Table S5	High and Moderate impact homozygous variants within the genes of interest (GOI) genes. Impact is determined based on VEP annotation.
Table S6	High and Moderate impact variants within the top 100 mutated genes of interest (GOI) genes. Impact is determined based on VEP annotation.
Table S7	Mutations observed in multiple offspring on 26537
Table S8	SRA and MGaP ID mapping for samples in the study

## Sheet: Supplementary Table 1
SampleID	Paternal_DNMs	Mixed_Unkown_DNMs	Maternal_DNMs	DeNovoGear_Total	PPDNM_filtered	Read_depth_filtered	Sample_AltRead_filtered	Simple_repeats_filtered	Seg_dups_filtered	mGAP_filtered	Parents_AltRead_filtered	pbinom_filtered	Sex	Birth	Sire	Dam	Sire_DOB	Paternal_age_at_offspring_birth	Dam_DOB	Dam_age	FinalDNMs	Hyp_Status	CallableBases	FinalDNMs_normalized	MEAN_COVERAGE	Final_Mutation_rate	Sample_median_VAF	Sample_mean_VAF
21061	1	6	0	500860	492064	6332	712	36	848	786	74	1	Male	1999-04-01	18607	18167	1995-05-17	3.9	1994-04-01	5	7	Non_Hyp	1321498541	15.0553	26.1896	0.529702	0.4348	0.439086
21125	2	3	1	455999	451851	2759	523	29	413	364	54	0	Male	1999-03-15	18607	18210	1995-05-17	3.8	1994-05-01	4.9	6	Non_Hyp	1320056103	12.9186	19.6074	0.454526	0.4674	0.4719
21133	1	4	0	549807	541358	4830	1577	70	1047	829	91	0	Female	1999-03-15	18607	17979	1995-05-17	3.8	1994-04-15	4.9	5	Non_Hyp	1322037983	10.7494	25.7858	0.378204	0.4444	0.46332
21137	1	2	0	579319	571345	5413	634	61	1007	643	213	0	Female	1999-07-01	18607	17968	1995-05-17	4.1	1994-05-21	5.1	3	Non_Hyp	1321970735	6.44997	22.9464	0.226934	0.5217	0.5339
21798	3	5	0	486236	483040	1987	557	18	333	267	26	0	Male	2000-05-01	18607	18110	1995-05-17	5	1994-05-01	6	8	Non_Hyp	1321573195	17.2051	23.0063	0.605339	0.53125	0.519637
22656	5	3	1	536426	529722	3721	1460	77	780	582	75	0	Female	2001-04-01	18607	17893	1995-05-17	5.9	1994-04-10	7	9	Non_Hyp	1322114572	19.3478	24.7525	0.680728	0.5417	0.518211
22662	1	5	1	445781	443521	1733	281	14	117	97	11	0	Male	2001-04-01	18607	18105	1995-05-17	5.9	1994-06-15	6.8	7	Non_Hyp	1036304952	19.1986	14.8636	0.675477	0.45	0.513871
23230	1	6	0	534330	525723	4318	2804	37	708	633	100	0	Female	2002-04-25	18607	17893	1995-05-17	6.9	1994-04-10	8	7	Non_Hyp	1321799313	15.0519	24.8744	0.529581	0.4706	0.461429
23232	2	4	1	503486	498762	3093	641	39	491	409	44	0	Male	2002-03-25	18607	18112	1995-05-17	6.9	1994-06-01	7.8	7	Non_Hyp	1322564729	15.0432	26.6268	0.529275	0.4375	0.443343
23234	2	5	0	533585	524982	4979	1512	82	1063	859	101	0	Female	2002-03-25	18607	18057	1995-05-17	6.9	1994-06-22	7.8	7	Non_Hyp	1322326930	15.0459	23.6194	0.52937	0.4643	0.4727
23246	0	3	0	520608	514466	3858	751	36	781	661	51	1	Female	2002-04-25	18607	17591	1995-05-17	6.9	1993-04-23	9	3	Non_Hyp	1321291004	6.45329	19.5833	0.227051	0.3636	0.362867
23252	2	5	1	512507	506672	3601	839	51	680	601	55	0	Female	2002-02-25	18607	18129	1995-05-17	6.8	1994-07-22	7.6	8	Non_Hyp	1317541006	17.2577	14.8068	0.607192	0.48685	0.482662
23264	4	1	0	545484	537459	4732	1334	53	952	877	71	1	Female	2002-02-25	18607	18111	1995-05-17	6.8	1994-06-01	7.7	5	Non_Hyp	1322260561	10.7476	24.7622	0.37814	0.5455	0.5229
23703	8	3	4	454943	451630	2282	478	24	245	233	34	2	Male	2003-04-15	18607	18008	1995-05-17	7.9	1994-06-10	8.9	15	Non_Hyp	1316745715	32.3778	15.2342	1.13917	0.44	0.454033
23715	3	8	2	520750	514569	3466	1202	75	728	617	80	0	Female	2003-02-15	18607	18087	1995-05-17	7.8	1994-07-01	8.6	13	Non_Hyp	1322285066	27.9432	22.9671	0.983147	0.5	0.493331
23718	3	9	1	473293	467905	3583	495	44	597	605	51	0	Male	2003-04-01	18607	18098	1995-05-17	7.9	1994-04-15	9	13	Non_Hyp	1322215299	27.9447	24.7881	0.983198	0.4722	0.468385
24269	5	4	1	480057	474525	3843	559	34	516	514	56	0	Male	2004-05-04	18607	18100	1995-05-17	9	1994-05-01	10	10	Non_Hyp	1322346928	21.4938	24.696	0.756231	0.4474	0.46982
24400	8	6	1	492717	488050	2999	669	40	459	430	55	0	Male	2003-12-01	18607	18216	1995-05-17	8.5	1994-05-01	9.6	15	Non_Hyp	1322076891	32.2472	25.2726	1.13458	0.5122	0.504453
24406	3	2	2	533624	527268	3498	1376	46	773	591	65	0	Female	2004-03-15	18607	18129	1995-05-17	8.8	1994-07-22	9.7	7	Non_Hyp	1321803679	15.0518	25.3676	0.529579	0.5714	0.518157
24407	1	1	3	477044	471620	3442	649	34	619	587	87	1	Male	2004-01-15	18607	17694	1995-05-17	8.7	1993-05-05	10.7	5	Non_Hyp	1321681273	10.7523	24.1052	0.378306	0.375	0.4568
24411	3	2	0	523600	517808	3582	808	68	696	567	66	0	Female	2004-04-07	18607	18122	1995-05-17	8.9	1994-07-12	9.7	5	Non_Hyp	1322018731	10.7496	21.3297	0.378209	0.4615	0.46458
24418	3	4	4	526179	520661	3246	1038	29	587	543	64	0	Female	2004-05-15	18607	18208	1995-05-17	9	1994-03-15	10.2	11	Non_Hyp	1321777953	23.6533	23.0219	0.832212	0.5	0.510136
24428	2	5	1	464158	459119	3464	586	50	490	386	55	0	Male	2004-06-01	18607	18206	1995-05-17	9	1994-05-01	10.1	8	Non_Hyp	1321034541	17.2121	21.2216	0.605586	0.43455	0.455987
24431	5	4	1	487607	482414	3116	738	55	629	589	56	0	Male	2003-07-01	18607	18129	1995-05-17	8.1	1994-07-22	8.9	10	Non_Hyp	1321849345	21.5019	25.978	0.756516	0.5826	0.55738
24432	3	7	2	469510	465212	2858	633	23	366	369	34	3	Male	2004-05-15	18607	18113	1995-05-17	9	1994-06-10	9.9	12	Non_Hyp	1321733449	25.8045	21.8645	0.907899	0.47725	0.478183
24433	4	7	1	486209	479826	3925	607	78	862	796	103	0	Male	2004-01-15	18607	18167	1995-05-17	8.7	1994-04-01	9.8	12	Non_Hyp	1321548372	25.8081	25.3919	0.908026	0.4174	0.433108
24434	7	5	1	548469	543713	2834	994	62	464	332	57	0	Female	2004-02-15	18607	18022	1995-05-17	8.8	1994-06-10	9.7	13	Non_Hyp	1322272836	27.9435	27.272	0.983156	0.4595	0.492531
24436	1	7	0	482646	477603	3282	538	39	536	577	63	0	Male	2004-04-07	18607	18095	1995-05-17	8.9	1994-05-01	9.9	8	Non_Hyp	1320800563	17.2152	22.0885	0.605693	0.5173	0.524713
24437	4	3	1	507445	500809	4440	594	57	749	719	69	0	Male	2004-06-15	18607	18205	1995-05-17	9.1	1994-05-01	10.1	8	Non_Hyp	1322201576	17.1969	27.0453	0.605051	0.533	0.511663
25206	3	5	1	467715	462706	3409	590	41	468	430	62	0	Male	2005-06-01	18607	18200	1995-05-17	10	1994-05-01	11.1	9	Non_Hyp	1322062752	19.3486	23.3609	0.680754	0.4667	0.474511
25207	6	2	4	489745	481443	5428	297	36	1255	1159	112	3	Male	2005-06-01	18607	18205	1995-05-17	10	1994-05-01	11.1	12	Non_Hyp	1321676504	25.8056	23.4423	0.907938	0.4936	0.49235
25208	3	4	0	506894	501603	3347	631	57	688	500	61	0	Female	2005-04-01	18607	18210	1995-05-17	9.9	1994-05-01	10.9	7	Non_Hyp	1320093793	15.0713	18.0923	0.530265	0.5417	0.525629
25210	5	6	4	542902	535850	4573	907	72	773	625	87	0	Female	2005-06-01	18607	18008	1995-05-17	10	1994-06-10	11	15	Non_Hyp	1322533626	32.2361	22.4212	1.13419	0.525	0.514193
25212	9	4	1	447381	443135	2712	616	58	399	397	50	0	Male	2005-06-01	18607	17745	1995-05-17	10	1993-05-01	12.1	14	Non_Hyp	1321749950	30.1049	20.4318	1.0592	0.50925	0.5277
25222	5	3	3	570946	557685	8606	1082	73	1641	1130	716	2	Male	2005-03-19	18607	17943	1995-05-17	9.8	1994-05-02	10.9	11	Non_Hyp	1321708691	23.6546	29.2528	0.832256	0.4324	0.440418
25224	5	10	4	587082	579160	4972	1474	51	624	676	106	0	Female	2005-07-31	18607	18241	1995-05-17	10.2	1994-09-16	10.9	19	Non_Hyp	1321148542	40.8752	20.7055	1.43814	0.375	0.427516
25228	1	6	2	468861	462759	3894	746	43	741	601	68	0	Male	2005-06-01	18607	17857	1995-05-17	10	1994-02-18	11.3	9	Non_Hyp	1321995235	19.3495	23.3091	0.680789	0.5	0.486511
26025	8	10	4	549905	542099	5476	1268	65	647	279	47	2	Female	2006-02-01	18607	18147	1995-05-17	10.7	1994-04-01	11.8	22	Non_Hyp	1245090972	50.2203	17.3332	1.76694	0.4	0.434091
26026	0	0	0	545242	544784	66	286	3	59	33	11	0	Female	2006-07-01	18607	17943	1995-05-17	11.1	1994-05-02	12.2	0	Non_Hyp	1317908029	0	15.1538	0	NA	NA
26027	4	4	0	469175	464182	3190	544	35	579	571	65	1	Male	2006-07-01	18607	17874	1995-05-17	11.1	1994-03-10	12.3	8	Non_Hyp	1320682739	17.2167	23.0136	0.605747	0.4603	0.46035
26029	6	3	1	510695	506129	3181	736	40	332	230	37	0	Female	2006-07-15	18607	18105	1995-05-17	11.2	1994-06-15	12.1	10	Non_Hyp	1039143225	27.3516	23.8741	0.962331	0.51805	0.49993
26031	2	4	0	518693	511138	4957	781	72	845	791	102	1	Female	2006-03-01	18607	18087	1995-05-17	10.8	1994-07-01	11.7	6	Non_Hyp	1319855051	12.9206	18.0143	0.454595	0.39	0.462533
26036	1	7	2	506622	500310	4250	641	42	641	646	82	0	Male	2006-05-01	18607	18008	1995-05-17	11	1994-06-10	11.9	10	Non_Hyp	1322532724	21.4908	25.4032	0.756125	0.5076	0.49004
26039	1	4	2	480067	474269	3593	1017	44	546	516	75	0	Male	2006-06-01	18607	17686	1995-05-17	11	1993-07-15	12.9	7	Non_Hyp	1322519572	15.0437	22.7852	0.529293	0.5312	0.4886
26040	4	2	1	496499	490444	4131	574	53	562	645	83	0	Male	2006-07-01	18607	18241	1995-05-17	11.1	1994-09-16	11.8	7	Non_Hyp	1322400661	15.045	25.3429	0.52934	0.4783	0.507871
26044	2	6	1	505474	499912	3683	611	60	601	492	106	0	Male	2006-03-01	18607	18090	1995-05-17	10.8	1994-06-01	11.8	9	Non_Hyp	1322019431	19.3492	26.4912	0.680777	0.4286	0.438567
26045	6	9	0	499552	490194	5948	347	43	1380	1473	152	0	Male	2006-02-01	18607	18167	1995-05-17	10.7	1994-04-01	11.8	15	Non_Hyp	1321528966	32.2606	27.3414	1.13505	0.4667	0.484593
26047	4	10	0	511922	505972	3894	664	48	679	567	84	0	Female	2006-01-01	18607	18133	1995-05-17	10.6	1994-04-01	11.8	14	Non_Hyp	1321348945	30.114	18.4225	1.05952	0.4118	0.442014
26048	2	1	1	507874	503358	2811	509	41	569	524	58	0	Female	2006-05-01	18607	18095	1995-05-17	11	1994-05-01	12	4	Non_Hyp	1319229527	8.61783	16.3416	0.303207	0.4628	0.462925
26069	5	3	0	525899	520804	3270	717	72	620	360	48	0	Female	2006-08-08	18607	17944	1995-05-17	11.2	1994-04-01	12.4	8	Non_Hyp	1295381838	17.553	14.515	0.617579	0.51925	0.528675
26709	4	4	0	485873	480960	3045	555	29	611	581	84	0	Male	2007-05-01	18607	18122	1995-05-17	12	1994-07-12	12.8	8	Non_Hyp	1322378938	17.1946	28.0206	0.60497	0.45355	0.4628
26712	3	4	0	529409	522680	3880	1128	67	796	756	95	0	Female	2007-02-01	18607	18222	1995-05-17	11.7	1994-05-01	12.8	7	Non_Hyp	1322257778	15.0467	22.9849	0.529398	0.5	0.5223
26714	3	4	2	481162	475738	3512	609	45	631	543	75	0	Male	2006-12-01	18607	18201	1995-05-17	11.6	1994-05-01	12.6	9	Non_Hyp	1322094551	19.3481	24.3389	0.680738	0.5	0.503822
26721	3	4	2	509872	503748	4039	726	45	623	611	71	0	Male	2007-06-01	18607	17943	1995-05-17	12	1994-05-02	13.1	9	Non_Hyp	1321388625	19.3584	24.4646	0.681102	0.5357	0.538167
26726	2	5	4	488597	482197	4355	623	50	658	634	69	0	Male	2007-02-01	18607	18111	1995-05-17	11.7	1994-06-01	12.7	11	Non_Hyp	1321446829	23.6593	23.0643	0.832421	0.4872	0.484936
26731	4	3	2	574632	566181	4689	2201	61	766	649	76	0	Female	2007-03-01	18607	17573	1995-05-17	11.8	1993-06-09	13.7	9	Non_Hyp	1321382725	19.3585	35.7765	0.681105	0.5185	0.516078
26732	5	5	1	545642	540152	3275	1072	57	495	525	54	1	Female	2007-03-01	18607	18090	1995-05-17	11.8	1994-06-01	12.8	11	Non_Hyp	1322126715	23.6471	27.1702	0.831993	0.5333	0.509782
28364	6	8	3	476667	470795	3735	651	55	652	704	58	0	Male	2008-06-04	18607	17944	1995-05-17	13.1	1994-04-01	14.2	17	Non_Hyp	1321855085	36.553	25.1311	1.28607	0.5161	0.504882
28365	6	7	0	540603	533251	4654	1077	52	819	649	88	0	Female	2008-07-04	18607	18201	1995-05-17	13.1	1994-05-01	14.2	13	Non_Hyp	1322396429	27.9409	24.5718	0.983064	0.4706	0.4963
28378	4	5	4	489120	480982	5215	340	36	1189	1218	127	0	Male	2009-02-04	18607	18008	1995-05-17	13.7	1994-06-10	14.7	13	Non_Hyp	1322505597	27.9386	25.9913	0.982983	0.4091	0.427515
28389	6	0	3	544850	538319	3879	1360	48	614	557	64	0	Female	2008-10-05	18607	18133	1995-05-17	13.4	1994-04-01	14.5	9	Non_Hyp	1323135481	19.3329	28.1746	0.680202	0.4828	0.510667
29472	5	7	3	553248	543861	5895	1230	81	1155	912	99	0	Female	2010-07-03	18607	18111	1995-05-17	15.1	1994-06-01	16.1	15	Non_Hyp	1321621077	32.2584	22.9517	1.13497	0.4333	0.464927
30547	6	24	23	501032	498735	1490	236	25	278	182	33	0	Male	2011-03-08	25329	26537	2005-05-06	5.8	2007-03-15	4	53	Hyp	1319632568	114.151	23.4273	4.01627	0.5	0.516847
31204	8	6	3	539351	533211	3539	1384	43	572	524	61	0	Female	2012-05-28	18607	22435	1995-05-17	17	2001-05-01	11.1	17	Non_Hyp	1321445139	36.5644	28.1453	1.28647	0.5	0.495335
31259	4	5	0	530702	524455	3475	1224	63	783	618	75	0	Female	2012-05-26	18607	23001	1995-05-17	17	2002-04-22	10.1	9	Non_Hyp	1321958487	19.3501	23.4665	0.680808	0.5	0.4938
31260	4	12	0	508490	503522	3109	587	52	677	473	54	0	Female	2012-05-31	18607	22256	1995-05-17	17.1	2001-03-15	11.2	16	Non_Hyp	1320010101	34.4509	18.8786	1.21211	0.5397	0.537937
31261	5	4	2	539830	533846	3835	846	87	609	534	62	0	Female	2012-06-03	18607	21742	1995-05-17	17.1	2000-05-01	12.1	11	Non_Hyp	1321637385	23.6558	22.9607	0.832301	0.5714	0.570927
31262	3	9	6	492364	486195	4160	749	28	638	500	76	0	Male	2012-06-03	18607	21847	1995-05-17	17.1	2000-06-01	12	18	Non_Hyp	1321831075	38.7039	24.0356	1.36175	0.5217	0.5342
31263	5	6	3	488421	483922	2913	627	31	440	426	48	0	Male	2012-06-10	18607	25856	1995-05-17	17.1	2006-03-01	6.3	14	Non_Hyp	1322071901	30.0975	25.0637	1.05894	0.45415	0.475336
31503	8	0	1	544873	538499	3790	1441	64	574	444	50	2	Female	2012-08-02	18607	27536	1995-05-17	17.2	2007-11-15	4.7	9	Non_Hyp	1321306716	19.3596	26.0742	0.681144	0.4706	0.4784
31883	4	7	1	478453	473400	3131	734	43	585	488	59	1	Male	2012-08-14	18607	25891	1995-05-17	17.3	2006-05-15	6.3	12	Non_Hyp	1320528354	25.828	21.3275	0.908727	0.49	0.508225
31885	6	3	0	557523	550190	4543	1220	66	723	659	113	0	Female	2012-07-03	18607	27151	1995-05-17	17.1	2008-05-08	4.2	9	Non_Hyp	1323082266	19.3336	24.4277	0.68023	0.4815	0.500656
31886	2	1	2	510060	503626	4370	662	71	642	614	70	0	Male	2012-07-08	18607	23813	1995-05-17	17.2	2003-06-15	9.1	5	Non_Hyp	1322728772	10.7438	27.1957	0.378006	0.3929	0.43042
31887	3	11	5	527880	521431	3616	1266	51	770	632	94	1	Female	2012-08-16	18607	27516	1995-05-17	17.3	2008-05-15	4.3	19	Non_Hyp	1322028353	40.848	24.1445	1.43719	0.5	0.510695
31970	8	33	18	497904	491569	4231	799	59	658	470	57	2	Male	2013-03-18	18607	26537	1995-05-17	17.8	2007-03-15	6	59	Hyp	1321055519	126.937	23.8482	4.46613	0.5	0.507408
31971	6	3	3	542208	535823	3794	1133	76	727	562	81	0	Female	2013-03-19	18607	26661	1995-05-17	17.9	2007-03-01	6.1	12	Non_Hyp	1321394301	25.8111	23.126	0.908132	0.46745	0.4737
32190	3	5	1	539727	530289	5350	1906	60	1161	852	100	0	Female	2013-05-07	18607	23903	1995-05-17	18	2003-02-01	10.3	9	Non_Hyp	1322678833	19.3395	25.9586	0.680437	0.5143	0.492611
32193	3	8	2	543852	536814	4021	1499	64	758	637	46	0	Female	2013-04-11	18607	27513	1995-05-17	17.9	2008-08-01	4.7	13	Non_Hyp	1322029658	27.9486	25.5497	0.983336	0.5	0.461208
32194	2	6	0	530299	523594	3488	1731	48	727	632	71	0	Female	2013-04-18	18607	22523	1995-05-17	17.9	2001-04-01	12.1	8	Non_Hyp	1321881565	17.2011	27.0147	0.605198	0.49325	0.4654
32195	4	4	2	482881	476998	3608	663	56	769	700	76	1	Male	2013-04-24	18607	23001	1995-05-17	18	2002-04-22	11	10	Non_Hyp	1322110505	21.4976	27.1385	0.756366	0.47825	0.49904
32196	2	5	2	492448	486229	3935	693	43	792	658	89	0	Male	2013-05-22	18607	26440	1995-05-17	18	2007-04-01	6.1	9	Non_Hyp	1321445537	19.3576	23.6588	0.681072	0.48	0.486211
32197	0	8	0	478388	471855	4378	729	50	706	602	60	0	Male	2013-04-18	18607	27515	1995-05-17	17.9	2008-05-15	4.9	8	Non_Hyp	1320728975	17.2161	21.7157	0.605726	0.5931	0.548037
32221	6	0	1	489508	484596	3250	527	68	532	467	61	0	Male	2013-05-29	18607	27521	1995-05-17	18	2008-04-01	5.2	7	Non_Hyp	1320055934	15.0718	25.5181	0.530281	0.5769	0.536143
32666	4	5	2	486572	480358	3998	775	53	673	635	69	0	Male	2013-06-28	18607	23665	1995-05-17	18.1	2003-05-01	10.2	11	Non_Hyp	1321303391	23.6618	27.0659	0.832511	0.5862	0.540264
32980	8	5	0	537646	530784	4183	1089	55	777	675	70	0	Female	2013-06-16	18607	27151	1995-05-17	18.1	2008-05-08	5.1	13	Non_Hyp	1322662266	27.9352	23.649	0.982866	0.48	0.498923
32981	4	3	4	538284	531892	3776	1236	80	663	556	70	0	Female	2013-07-15	18607	21847	1995-05-17	18.2	2000-06-01	13.1	11	Non_Hyp	1322182353	23.6461	24.6858	0.831958	0.4545	0.479045
32982	8	8	2	519027	512366	4214	629	66	868	778	88	0	Male	2013-06-23	18607	25891	1995-05-17	18.1	2006-05-15	7.1	18	Non_Hyp	1321549874	38.7121	29.8502	1.36204	0.5	0.524839
32983	6	7	0	536428	530230	3667	1058	51	744	600	65	0	Female	2013-07-01	18607	22256	1995-05-17	18.1	2001-03-15	12.3	13	Non_Hyp	1321122417	27.9678	23.1464	0.984012	0.5263	0.519392
33255	4	6	0	538948	530529	5487	1007	34	1019	788	74	0	Female	2014-05-07	18607	27515	1995-05-17	19	2008-05-15	6	10	Non_Hyp	1320531024	21.5233	20.6401	0.757271	0.6364	0.59455
33256	5	4	2	532245	526049	3780	1041	54	654	579	77	0	Female	2014-04-08	18607	22435	1995-05-17	18.9	2001-05-01	12.9	11	Non_Hyp	1321233193	23.6631	23.139	0.832556	0.5263	0.518982
33257	7	6	1	539344	533561	3289	1160	63	705	491	61	0	Female	2014-05-07	18607	22256	1995-05-17	19	2001-03-15	13.2	14	Non_Hyp	1321424958	30.1123	24.8382	1.05946	0.4736	0.482293
33258	6	22	18	559115	550746	5217	1485	56	807	661	96	1	Female	2014-04-08	18607	26537	1995-05-17	18.9	2007-03-15	7.1	46	Hyp	1322316558	98.8736	26.5822	3.47874	0.48335	0.49612
33259	7	10	0	545562	538123	4914	863	79	804	684	77	1	Female	2014-04-15	18607	26661	1995-05-17	18.9	2007-03-01	7.1	17	Non_Hyp	1321947349	36.5505	22.5578	1.28598	0.5185	0.512329
33896	2	5	3	487080	481027	4061	856	41	520	504	60	1	Male	2014-06-01	18607	27151	1995-05-17	19.1	2008-05-08	6.1	10	Non_Hyp	1321016901	21.5154	21.8187	0.756993	0.45135	0.47334
34051	6	6	0	552647	545522	4171	1467	50	726	607	90	2	Female	2014-08-09	18607	27513	1995-05-17	19.2	2008-08-01	6	12	Non_Hyp	1322182911	25.7957	27.2169	0.90759	0.53735	0.498958
34052	6	4	1	529696	524217	3368	847	48	617	509	79	0	Female	2014-06-14	18607	27536	1995-05-17	19.1	2007-11-15	6.6	11	Non_Hyp	1321269352	23.6624	22.0426	0.832533	0.4815	0.465891
34053	4	7	2	559613	550972	4985	1708	60	959	827	89	0	Female	2014-08-11	18607	25891	1995-05-17	19.2	2006-05-15	8.2	13	Non_Hyp	1320815735	27.9743	26.4461	0.98424	0.4615	0.478762
34692	5	8	1	493778	486695	4725	746	54	789	682	73	0	Male	2015-06-20	18607	27515	1995-05-17	20.1	2008-05-15	7.1	14	Non_Hyp	1321240714	30.1165	24.5103	1.05961	0.5147	0.507886
34749	12	9	3	533749	527255	4249	813	65	714	552	77	0	Female	2015-03-27	18607	26661	1995-05-17	19.9	2007-03-01	8.1	24	Non_Hyp	1321687949	51.6108	21.4364	1.81586	0.5242	0.513308
34760	5	8	3	487781	481037	4449	777	46	776	616	64	0	Male	2015-06-29	18607	26440	1995-05-17	20.1	2007-04-01	8.2	16	Non_Hyp	1321561525	34.4105	25.7263	1.21069	0.5	0.500212
34761	5	5	0	483751	479633	2655	546	40	437	378	51	1	Male	2015-06-09	18607	27536	1995-05-17	20.1	2007-11-15	7.6	10	Non_Hyp	1321821396	21.5023	22.9304	0.756532	0.50925	0.53881
34762	5	5	1	480418	474944	3316	779	56	604	624	83	1	Male	2015-03-22	18607	23001	1995-05-17	19.9	2002-04-22	12.9	11	Non_Hyp	1321797547	23.653	22.2958	0.8322	0.4545	0.476491
34763	1	3	2	515525	506917	5433	1255	42	959	806	107	0	Female	2015-06-28	18607	26851	1995-05-17	20.1	2007-02-01	8.4	6	Non_Hyp	1317638603	12.9423	23.2118	0.45536	0.4599	0.47465
34764	5	31	28	483551	478234	3629	563	46	541	420	54	0	Male	2015-05-08	18607	26537	1995-05-17	20	2007-03-15	8.2	64	Hyp	1321541195	137.644	21.3001	4.84283	0.5	0.498489
35286	3	19	24	568947	566714	1411	501	23	161	75	16	0	Female	2016-04-05	30186	26537	2011-05-25	4.9	2007-03-15	9.1	46	Hyp	1321605060	98.9269	21.9609	3.48062	0.48075	0.483239
35413	7	4	1	490484	484614	3712	501	38	794	731	81	1	Male	2016-05-05	18607	27515	1995-05-17	21	2008-05-15	8	12	Non_Hyp	1321063354	25.8176	24.9056	0.908359	0.47355	0.477092
35719	7	5	1	543002	536183	3552	1657	57	820	645	75	0	Female	2016-03-28	18607	23001	1995-05-17	20.9	2002-04-22	13.9	13	Non_Hyp	1322211780	27.9448	25.9129	0.983201	0.5	0.488
35721	5	2	0	479231	474661	2842	727	46	462	442	44	0	Male	2016-03-01	18607	29976	1995-05-17	20.8	2011-04-04	4.9	7	Non_Hyp	1321814745	15.0517	22.6776	0.529575	0.4348	0.467686
36319	2	29	17	487361	485448	1202	313	13	189	131	16	1	Male	2017-04-15	30325	26537	2011-07-06	5.8	2007-03-15	10.1	48	Hyp	1317100391	103.581	20.7931	3.64437	0.5	0.494569
37026	3	5	1	474314	467773	4329	535	37	834	728	68	1	Male	2017-05-15	18607	26851	1995-05-17	22	2007-02-01	10.3	9	Non_Hyp	1317825937	19.4108	26.2159	0.682943	0.5789	0.581822
37204	9	8	2	472949	467023	3699	727	44	635	698	104	0	Male	2018-04-03	18607	23001	1995-05-17	22.9	2002-04-22	16	19	Non_Hyp	1321723843	40.8574	24.2094	1.43752	0.4583	0.479889

## Sheet: Supplementary Table 2
SampleID	chrom	pos	ref	alt	phase_var_pos	phase_var_ref	phase_var_alt	AA_AR_read_support	phase	summarized_phase
21061	4	138460453	A	C	1.3846e+116	C,C,C,T,T,A,T,T,G,C,A,A,C	T,T,G,C,C,T,C,C,T,T,G,G,G	1|0,1|0,2|0,2|0,3|0,4|0,5|0,5|0,7|0,8|0,7|0,4|0,3|0	F,F,F,F,F,M,F,F,F,F,F,M,F	F,M
21061	8	91069655	T	C	91069560	C	T	0|6	F	F
21125	1	182592590	T	A	1.82592e+17	A,G	G,A	1|0,6|0	F,F	F
21125	17	83162054	A	T	8.31619e+39	G,G,G,G,A	A,C,T,A,G	4|0,4|0,3|0,2|0,4|0	M,M,M,M,M	M
21125	2	77368005	A	G	7.73677e+39	A,G,C,T,A	C,A,T,G,C	1|0,6|0,5|0,7|0,3|0	F,F,F,F,F	F
21133	10	30444593	G	A	30444641,30444647,30444649,30444663,30444671,30444690,30444703,30444725,30444746,30444752,30444757,30444758,30444797,30444815,30444837,30444841,30444857,30444858,30444861,30444897,30444910,30444926,30444930,30444933,30444934,30444942,30444971,30444986,30444993,30445025,30445028,30445045,30445047	C,G,C,T,C,T,T,C,T,C,C,A,G,T,G,T,T,T,T,T,T,T,G,T,A,C,C,G,T,G,A,A,A	A,A,A,C,T,C,C,G,C,T,A,G,A,C,A,A,C,A,C,C,C,G,A,A,T,T,T,C,C,T,G,C,G	2|0,2|0,2|0,2|0,2|0,2|0,3|0,5|0,8|0,8|0,8|0,8|0,11|0,13|0,14|0,14|0,11|0,12|0,10|0,9|0,8|0,6|0,1|8,5|0,1|6,3|0,2|0,1|0,1|0,1|0,1|0,1|0,1|0	F,F,F,F,F,F,F,F,F,F,F,F,F,F,F,F,F,F,F,F,F,F,M,F,M,F,F,F,F,F,F,F,F	F,M
21133	3	119390675	C	T	119390444	G	A	11|0	F	F
21133	8	7750392	C	T	7.75002e+90	C,C,C,A,C,G,T,C,T,C,G,G,A	T,T,G,C,A,C,A,T,C,T,A,A,C	2|0,6|0,6|0,6|0,4|0,3|0,3|0,3|0,3|0,2|0,1|0,2|0,1|0	F,F,F,F,F,F,F,F,F,F,F,F,M	F,M
21133	8	7777712	T	C	7.77738e+48	T,C,A,A,A,C,G	G,G,G,G,T,G,A	2|0,3|0,1|0,1|0,4|0,3|0,1|0	M,M,F,F,F,F,F	F,M
21137	4	145703277	G	T	145703328	A	G	2|0	F	F
21798	10	46342041	C	T	4634191046342250	A,C	G,T	0|10,0|8	F,F	F
21798	12	125174973	G	A	1.25175e+17	G,C	A,G	11|0,13|0	F,F	F
21798	2	59723824	C	T	5972364359723850	T,G	C,A	0|12,0|2	F,F	F
21798	8	8306656	T	C	83066058306607	A,C	C,T	2|0,2|0	F,F	F
22656	10	55916801	G	C	55916510	G	T	8|0	F	F
22656	13	341400	G	A	3.41318e+23	G,C,C,T	A,G,A,G	0|4,0|2,0|2,3|0	F,F,F,F	F
22656	14	127833027	C	G	1.27833e+17	C,G	T,C	1|0,2|0	F,F	F
22656	16	51504473	C	T	51504517	T	C	0|4	M	M
22656	8	21306151	G	A	2.13057e+31	C,T,C,T	T,C,T,C	0|2,0|6,0|6,0|10	F,F,F,F	F
22656	8	65352430	T	A	6535220665352680	T,C	C,T	0|2,0|6	F,F	F
22662	13	18157939	G	T	1.81576e+31	C,C,T,T	T,A,C,C	2|0,4|0,6|0,1|0	F,F,F,F	F
22662	16	42645117	G	A	4.2645e+31	T,A,A,C	G,G,G,A	8|0,0|6,0|8,0|2	M,M,M,M	M
22662	4	140064960	A	G	1.40065e+134	G,C,T,C,G,A,T,C,A,C,T,C,T,T,A	A,T,C,T,A,G,G,T,G,T,A,T,A,C,G	0|2,1|0,1|0,1|0,3|0,3|0,4|0,5|0,5|0,5|0,7|0,7|0,8|0,0|4,2|0	M,F,F,F,F,F,F,F,F,F,F,F,F,M,F	F,M
23230	4	124608975	C	T	1.24609e+17	C,G	G,T	0|2,7|0	F,F	F
23230	7	63956716	A	G	6.39563e+31	A,G,T,C	G,A,G,T	1|0,2|0,1|0,0|2	F,F,M,F	F,M
23232	17	94222279	C	T	9.4222e+23	C,T,T	T,C,C	9|0,10|0,0|10	F,F,F	F
23232	6	113453159	A	C	113452789	C	T	1|0	F	F
23232	9	45956949	G	A	4595655245956790	G,A	C,C	1|0,0|2	M,M	M
23234	12	77823676	C	T	77823839	G	A	0|6	F	F
23234	7	162785740	C	T	162786108	G	A	0|2	F	F
23234	X	22032771	A	C	22032833	A	T	2|0	M	M
23246	4	138559647	A	C	1.38559e+170	A,T,A,G,G,A,A,A,T,A,C,C,G,G,G,C,G,G,G	G,C,C,C,T,G,G,G,C,C,G,T,T,A,A,A,C,C,A	0|2,0|2,2|0,0|2,0|2,0|2,0|2,0|2,1|0,0|2,0|4,0|4,6|0,7|0,3|0,4|0,0|2,1|0,0|2	M,M,F,F,M,M,M,M,M,F,M,M,M,M,F,M,M,M,M	F,M
23252	10	30444593	G	A	3.04446e+127	C,G,C,T,C,T,T,C,T,C,C,A,C,G,G,T	A,A,A,C,T,C,C,G,C,T,A,G,A,A,A,C	3|0,5|0,5|0,7|0,7|0,7|0,8|0,8|0,8|0,8|0,7|0,7|0,5|0,5|0,1|0,1|0	F,F,F,F,F,F,F,F,F,F,F,F,M,F,F,F	F,M
23252	12	93193826	G	A	93193712	C	T	0|2	M	M
23252	15	43667695	C	T	43667609	A	G	0|10	F	F
23252	2	152610418	C	T	1.5261e+17	G,T	C,C	0|2,1|0	F,M	F,M
23252	4	140393188	G	A	1.40393e+44	T,C,G,A,C	A,T,A,C,T	1|0,0|4,4|0,1|6,5|0	M,M,F,M,M	F,M
23264	1	156672798	C	T	1.56672e+62	A,G,G,G,G,A,G	G,A,A,A,A,G,T	5|0,10|0,5|0,5|0,2|0,1|0,1|0	F,F,F,F,F,F,F	F
23264	1	175304319	G	C	1.75304e+53	T,G,G,T,T,A	G,C,C,C,C,C	0|4,2|0,2|0,0|4,0|2,0|2	F,F,F,F,F,F	F
23264	1	175304321	G	C	1.75304e+53	T,G,G,T,T,A	G,C,C,C,C,C	0|4,2|0,1|0,0|4,0|2,0|2	F,F,F,F,F,F	F
23264	12	106839385	C	T	106839443	C	T	2|0	F	F
23703	1	141907550	G	T	141907723	T	C	0|10	F	F
23703	16	32963247	G	A	3.2963e+47	C,T,C,G,G,C	G,C,T,A,A,T	0|4,1|0,1|0,7|0,8|0,0|4	M,F,F,M,M,F	F,M
23703	16	32963249	C	G	3.2963e+47	C,T,C,G,G,C	G,C,T,A,A,T	0|4,1|0,1|0,7|0,8|0,0|4	M,F,F,M,M,F	F,M
23703	16	32963253	C	G	3.2963e+47	C,T,C,G,G,C	G,C,T,A,A,T	0|4,1|0,1|0,6|0,7|0,0|4	M,F,F,M,M,F	F,M
23703	16	32963254	G	A	3.2963e+47	C,T,C,G,G,C	G,C,T,A,A,T	0|4,1|0,1|0,6|0,7|0,0|4	M,F,F,M,M,F	F,M
23703	16	32963255	C	T	3.2963e+55	C,T,C,G,G,C,A	G,C,T,A,A,T,T	0|4,1|0,1|0,6|0,7|0,0|4,1|0	M,F,F,M,M,F,M	F,M
23703	2	58848735	C	A	58848420	G	A	2|0	F	F
23703	3	109904547	C	A	109904516	G	A	2|0	F	F
23703	4	138547544	G	A	1.38547e+17	G,C	T,G	1|0,1|0	M,F	F,M
23703	7	168939394	C	T	1.68939e+107	C,T,G,C,G,G,G,T,A,T,T,G	T,C,C,G,A,A,T,C,G,G,C,T	1|0,1|0,1|0,1|0,1|0,2|0,1|0,1|0,1|0,2|0,3|0,2|0	M,M,M,M,M,M,M,M,M,M,M,M	M
23703	7	168939429	T	A	1.68939e+125	C,T,G,C,G,G,G,T,A,G,G,T,T,G	T,C,C,G,A,A,T,C,G,T,C,G,C,T	1|0,1|0,1|0,1|0,1|0,1|0,1|0,1|0,1|0,2|0,2|0,2|0,3|0,2|0	M,M,M,M,M,M,M,M,M,M,M,M,M,M	M
23703	8	4134680	T	C	41345514134856	C,C	A,T	0|4,11|0	M,M	M
23715	1	102512631	G	T	1.02513e+17	G,C	T,T	0|2,0|14	F,F	F
23715	12	22126579	A	G	22126385	G	A	8|0	F	F
23715	16	32910600	C	T	32910903	C	G	10|0	F	F
23715	17	76709187	G	T	7670953276709530	T,T	A,A	1|0,1|0	M,M	M
23715	17	76709188	C	A	7670953276709530	T,T	A,A	1|0,1|0	M,M	M
23715	5	158330955	T	C	158331002	G	A	0|6	F	F
23718	10	40147653	C	T	4.01478e+23	T,T,G	G,C,A	2|0,1|0,1|0	M,M,M	M
23718	10	40147654	T	G	4.01478e+23	T,T,G	G,C,A	2|0,1|0,1|0	M,M,M	M
23718	13	54913593	A	G	5.49138e+23	G,C,G	A,T,T	6|0,0|12,0|6	F,F,F	F
23718	4	134971480	G	A	134971698	T	C	8|0	F	F
23718	5	184686802	G	A	184686989	C	T	0|10	F	F
23718	9	128508772	G	A	1.28509e+26	G,C,A	A,T,G	6|0,0|4,0|2	M,M,M	M
24269	10	71515049	G	A	7151473171515360	A,A	G,G	2|0,1|8	M,F	F,M
24269	14	86355164	G	A	86355296	C	T	0|6	F	F
24269	2	63102341	T	C	6310221663102590	A,A	G,G	0|12,0|4	F,F	F
24269	2	121004797	A	G	1.21005e+35	A,C,C,G	C,A,G,A	0|2,0|4,0|2,0|4	F,F,F,F	F
24269	6	126692642	C	A	1.26692e+17	T,A	C,C	3|0,8|0	M,M	M
24269	7	155488493	T	A	1.55488e+26	G,G,T	T,A,A	0|4,0|4,0|8	F,F,F	F
24269	8	51788013	A	G	5178772751788180	A,A	T,C	4|0,9|0	F,F	F
24400	1	44930074	G	T	4.49298e+31	G,G,T,T	C,T,C,C	0|6,0|4,0|2,2|0	M,M,M,M	M
24400	1	85494859	C	T	8.54946e+39	C,G,T,C,A	T,T,C,A,G	0|8,1|0,0|2,0|4,3|0	F,F,F,F,F	F
24400	12	22126579	A	G	2212638522126460	G,G	A,C	10|0,0|6	F,F	F
24400	17	18971057	G	A	18970899	C	T	0|6	F	F
24400	2	86210901	G	A	8621123186211310	G,T	C,A	3|0,1|0	F,F	F
24400	5	63868225	A	G	63868494	A	G	0|8	F	F
24400	5	70750822	G	A	7.07506e+31	A,C,G,T	G,G,A,C	8|0,8|0,0|2,2|0	F,F,F,F	F
24400	7	10922012	G	A	1.09216e+23	G,G,C	A,A,G	1|0,1|0,1|0	F,F,F	F
24400	7	131042945	G	A	1.31043e+44	T,C,A,C,A	A,A,G,G,G	0|10,10|0,0|10,6|0,0|4	F,F,F,F,F	F
24406	1	84258256	T	C	84257975	C	A	7|0	F	F
24406	17	75847920	G	A	75847807	A	C	0|12	F	F
24406	4	138463368	C	T	1.38463e+116	G,A,T,A,C,A,T,C,G,C,G,C,T	A,G,A,G,T,G,C,G,T,T,A,T,C	0|4,4|0,5|0,3|0,1|0,2|0,6|0,6|0,9|0,9|0,5|0,5|0,4|0	M,F,F,M,M,M,M,M,F,F,F,F,F	F,M
24406	6	15820448	G	A	15820351	G	A	0|6	M	M
24406	6	119084948	G	A	119084954	A	G	0|2	M	M
24406	X	146819050	G	A	1.46819e+17	T,C	C,T	2|0,7|0	F,F	F
24407	15	107238285	C	G	1.07238e+71	A,A,C,A,G,A,C,T	C,C,T,G,C,G,G,C	1|0,9|0,0|2,0|2,7|0,3|0,1|0,1|0	M,M,M,M,M,M,M,M	M
24407	15	107238286	C	T	1.07238e+71	A,A,C,A,G,A,C,T	C,C,T,G,C,G,G,C	1|0,9|0,0|2,0|2,7|0,3|0,1|0,1|0	M,M,M,M,M,M,M,M	M
24407	15	107238289	G	A	1.07238e+71	A,A,C,A,G,A,C,T	C,C,T,G,C,G,G,C	1|0,9|0,0|2,0|2,7|0,3|0,1|0,1|0	M,M,M,M,M,M,M,M	M
24407	3	50478867	G	A	5047849250478760	C,T	T,C	1|0,5|0	F,F	F
24411	1	34927837	C	G	3.49276e+39	A,A,G,A,A	T,T,A,C,T	0|2,2|0,4|0,4|0,2|0	F,F,F,F,F	F
24411	1	76829900	T	C	7.68297e+23	A,T,A	G,C,G	10|0,3|0,4|0	F,F,F	F
24411	14	119269569	A	C	119269875	A	G	0|4	F	F
24418	1	80951387	T	C	80951250	C	T	0|6	M	M
24418	1	180492022	G	A	180491760	C	T	0|6	M	M
24418	13	100232408	G	A	1.00233e+35	G,G,G,C	A,A,A,G	6|0,3|0,4|0,3|0	F,F,F,F	F
24418	14	17484918	A	C	1.74848e+23	A,T,T	G,G,C	0|4,0|2,2|0	M,M,M	M
24418	16	32584153	G	A	3.25838e+39	C,T,C,C,G	T,C,G,G,A	1|0,8|0,8|0,7|0,0|4	F,F,F,F,F	F
24418	7	169092984	G	A	1.69093e+26	A,C,C	C,T,T	0|6,4|0,1|0	M,M,M	M
24418	X	11963303	G	A	1196337911963380	G,G	T,T	0|4,0|4	F,F	F
24428	12	25062987	T	G	2.50629e+55	G,C,T,A,G,G,A	A,T,C,G,A,C,G	1|0,5|0,7|0,4|0,5|0,3|0,3|0	M,M,M,M,M,M,M	M
24428	3	160840714	A	T	1.6084e+80	G,C,A,T,A,A,G,A,A	A,T,G,C,G,G,T,G,G	1|0,2|0,3|0,3|0,3|0,3|0,7|0,7|0,3|0	F,F,F,F,F,F,F,F,F	F
24428	4	138538099	G	A	1.38538e+89	T,C,C,G,T,G,C,G,T,T	G,G,T,A,G,A,T,T,C,C	0|4,2|0,2|0,2|0,4|0,3|0,1|0,0|4,0|4,6|0	M,F,F,F,F,F,F,M,M,M	F,M
24428	6	38400831	G	A	3.84007e+23	C,T,T	T,A,C	0|12,0|2,0|10	F,F,F	F
24431	15	96006255	G	A	9.6006e+71	T,T,G,A,G,A,G,G,C	A,C,T,G,A,G,A,A,T	0|6,0|6,0|6,0|2,0|2,0|2,0|6,10|0,0|4	F,F,F,F,F,F,F,F,F	F
24431	20	48153258	A	G	4.81529e+31	T,C,A,A	G,T,C,G	3|0,0|2,3|0,0|2	F,F,F,F	F
24431	4	140412197	G	A	1.40412e+71	C,C,A,G,C,C,C,C	T,T,G,T,A,T,T,G	1|0,0|4,2|0,2|0,0|4,0|10,0|10,0|10	F,F,F,F,F,F,F,F	F
24431	4	140412200	G	A	1.40412e+71	C,C,A,G,C,C,C,C	T,T,G,T,A,T,T,G	1|0,0|4,2|0,2|0,0|4,0|10,0|10,0|10	F,F,F,F,F,F,F,F	F
24431	6	151256373	G	A	1.51256e+17	C,T	T,C	0|14,12|0	M,M	M
24431	7	118392154	C	T	118392549	G	T	2|0	F	F
24431	8	29769582	A	G	2.97697e+23	T,A,T	A,C,C	1|0,0|2,0|4	M,F,F	F,M
24432	11	11886440	G	C	1.18861e+31	C,A,G,G	A,T,T,A	1|0,1|0,2|0,0|6	F,M,M,M	F,M
24432	13	31809641	A	C	31810043	G	A	0|2	F	F
24432	17	92753166	G	A	9.27527e+39	C,C,G,G,C	T,G,T,C,T	1|0,7|0,0|8,0|4,7|0	F,F,F,F,F	F
24432	3	80177254	G	C	8.01768e+23	T,C,T	C,G,C	0|2,0|2,0|2	F,M,M	F,M
24432	6	38369278	C	G	3.83689e+23	T,T,C	C,C,T	1|0,0|4,4|0	F,F,F	F
24432	6	108454962	A	T	108455135	T	G	8|0	F	F
24432	8	73103914	C	T	7.31035e+23	T,T,A	C,C,G	0|2,0|10,0|12	M,M,M	M
24433	1	56857628	C	T	56857726	G	C	0|10	F	F
24433	10	7173502	C	T	7.17357e+20	G,T,T	A,C,C	2|0,1|6,1|0	F,F,M	F,M
24433	11	11886431	G	T	1.18862e+39	A,T,T,G,A	T,G,A,A,T	4|0,6|0,6|0,6|0,4|0	F,F,F,F,F	F
24433	11	11886440	G	C	1.18862e+39	A,T,T,G,A	T,G,A,A,T	4|0,6|0,7|0,6|0,2|0	F,F,F,F,F	F
24433	12	128295326	G	A	1.28295e+62	A,A,G,C,C,G,A	C,T,A,T,T,A,G	6|0,9|0,10|0,4|0,8|0,0|2,2|0	M,M,M,M,M,M,M	M
24433	17	43492911	C	T	4349265443493130	G,T	C,A	8|0,0|4	F,F	F
24433	4	258991	C	G	258589259046	G,G	A,A	0|2,3|0	F,F	F
24433	4	138463368	C	T	1.38463e+152	A,T,A,G,G,C,A,C,C,G,C,G,C,T,A,A,C	G,A,G,A,A,T,G,T,G,T,T,A,T,C,G,G,T	2|0,6|0,4|0,1|0,1|0,2|0,2|0,8|0,8|0,12|0,10|0,6|0,5|0,5|0,2|0,1|0,1|0	F,F,M,M,M,M,M,M,M,F,F,F,F,F,M,M,M	F,M
24433	7	21554694	G	A	2.15547e+23	T,T,T	A,C,C	0|6,0|2,0|2	F,F,F	F
24434	1	21988729	G	A	2.19884e+31	G,T,T,T	C,C,G,C	1|0,3|0,0|10,3|0	F,F,F,F	F
24434	12	44927188	A	G	4492684944926990	C,T	T,C	1|0,8|0	F,F	F
24434	13	69181704	C	T	69181327	A	G	1|0	F	F
24434	14	282381	C	G	282530282540	A,C	G,T	0|14,0|12	F,F	F
24434	14	66386186	A	G	66385960	G	A	6|0	F	F
24434	3	135322322	C	T	1.35322e+17	C,G	T,A	0|10,0|2	F,F	F
24434	4	4653885	A	T	46542544654292	T,C	C,T	0|4,0|2	F,F	F
24434	4	138559818	G	A	1.38559e+116	C,T,G,G,G,G,C,C,C,T,G,G,G	T,G,A,A,C,T,G,T,T,*,A,A,T	0|2,0|2,1|0,1|0,1|0,2|0,1|0,0|4,7|0,1|0,2|0,1|6,1|6	M,M,M,M,M,F,M,F,M,M,M,F,F	F,M
24434	4	140405216	C	A	1.40405e+17	A,C	G,T	4|0,5|0	F,F	F
24434	5	45535615	C	T	45535772	A	C	0|16	F	F
24436	15	105013536	G	A	1.05013e+35	G,C,A,G	A,T,G,A	0|6,0|4,0|2,0|2	F,F,F,F	F
24436	2	152610418	C	T	1.5261e+44	C,C,T,T,A	T,T,C,G,C	2|0,2|0,4|0,0|4,0|4	F,M,F,M,M	F,M
24436	7	10869316	A	C	1.08693e+63	G,A,T,G,C,T,T,C	T,G,C,A,T,G,C,T	0|2,0|2,0|2,0|2,1|0,2|0,2|0,4|0	M,M,M,M,F,F,F,F	F,M
24437	15	7429302	C	G	7429109	G	A	0|10	F	F
24437	16	24136860	G	T	24137210	T	C	2|0	F	F
24437	19	54420366	A	T	5.442e+95	T,G,T,A,C,T,A,A,G,C,A,G	C,A,C,G,T,C,T,G,A,T,G,T	1|0,0|2,8|0,4|0,4|0,2|0,2|0,2|0,1|6,1|6,5|0,1|0	F,M,M,F,F,F,M,M,M,M,F,M	F,M
24437	5	12914619	G	A	1.29144e+39	G,G,A,C,T	A,T,G,G,C	0|12,0|10,0|6,0|8,0|4	F,F,F,F,F	F
24437	6	153034866	T	A	1.53035e+26	C,G,T	T,A,C	5|0,3|0,2|0	F,F,F	F
24437	7	66808175	G	A	6.68078e+31	A,A,C,G	G,C,T,A	0|2,0|2,0|10,0|12	M,M,M,M	M
25206	12	22126579	A	G	22126385	G	A	5|0	F	F
25206	15	91596709	A	G	91596427	A	G	5|0	F	F
25206	4	140276669	C	T	1.40276e+26	A,C,T	C,T,C	1|0,3|0,6|0	M,M,M	M
25206	5	71690854	G	A	7169055571691020	C,A	T,G	2|0,0|6	F,F	F
25206	7	10866882	G	A	10867172	A	G	1|8	F	F
25207	1	218820566	G	A	2.1882e+35	G,G,G,C	C,C,A,T	0|2,0|2,4|0,3|0	F,F,F,F	F
25207	14	125659327	G	A	1.25659e+26	A,C,A	C,T,C	0|2,0|2,9|0	F,F,F	F
25207	15	5048242	G	T	5.04781e+20	C,C,A	T,T,T	0|2,1|16,1|10	M,M,M	M
25207	2	189838739	A	G	1.89839e+26	A,C,G	T,T,A	0|4,0|8,0|10	M,M,M	M
25207	4	119668537	G	A	119668645	C	G	4|0	M	M
25207	4	140471901	C	T	1.40471e+62	G,C,G,A,C,C,C	T,A,A,T,T,G,T	1|0,0|4,3|0,0|2,3|0,1|0,0|2	F,F,F,F,F,F,F	F
25207	4	140471902	G	A	1.40471e+62	G,C,G,A,C,C,C	T,A,A,T,T,G,T	1|0,0|4,3|0,0|2,3|0,1|0,0|2	F,F,F,F,F,F,F	F
25207	8	63628587	G	A	63628798	G	T	9|0	F	F
25207	8	136193101	G	C	1.36193e+44	C,G,A,C,A	A,T,G,T,C	0|8,0|8,4|0,0|2,1|0	F,F,F,F,F	F
25207	9	41675638	G	A	4.16754e+31	T,A,C,A	G,C,T,T	1|6,0|6,1|0,3|0	M,M,M,M	M
25208	1	84559768	C	T	84559957	T	C	0|16	F	F
25208	12	107910515	G	C	1.0791e+44	T,A,T,G,T	C,G,C,A,G	2|0,11|0,0|10,6|0,2|0	F,F,F,F,F	F
25208	14	31798233	G	A	31798043	C	A	4|0	F	F
25208	6	87615448	A	T	8.76151e+31	T,C,G,G	A,T,A,A	0|4,0|4,0|2,0|2	M,F,F,F	F,M
25210	1	103083335	G	A	1.03083e+53	C,G,G,G,C,C	T,A,T,A,T,T	3|0,4|0,4|0,2|0,3|0,1|0	M,M,M,M,M,M	M
25210	1	106147197	G	A	106147511	G	A	5|0	F	F
25210	14	127833027	C	G	1.27833e+35	T,G,A,A	C,C,G,C	1|0,1|0,0|2,1|0	F,F,F,F	F
25210	15	43845676	G	A	4384571743845750	A,A	G,G	0|2,0|6	F,F	F
25210	17	11658988	C	T	11659241	G	T	0|8	M	M
25210	17	43512049	C	T	4.3512e+31	T,A,C,C	C,G,T,G	0|4,8|0,3|0,1|0	F,F,F,F	F
25210	18	55643427	G	A	5.56435e+23	G,A,T	T,G,C	0|6,0|10,0|6	M,M,M	M
25210	7	168472630	A	G	1.68472e+62	C,C,G,C,T,T,G	G,G,T,T,C,C,A	2|0,4|0,4|0,1|0,1|0,1|0,1|0	M,M,M,M,M,M,M	M
25210	8	127643155	C	G	127642968	A	G	9|0	F	F
25212	10	30444593	G	A	3.04446e+159	C,G,C,T,C,T,T,C,G,T,G,T,T,T,T,T,T,T,T,C	A,A,A,C,T,C,C,G,A,C,A,A,C,A,C,C,C,G,A,T	1|0,1|0,1|0,2|0,2|0,2|0,2|0,2|0,7|0,8|0,7|0,7|0,7|0,8|0,7|0,6|0,7|0,4|0,1|0,1|0	F,F,F,F,F,F,F,F,F,F,F,F,F,F,F,F,F,F,F,F	F
25212	17	45691065	T	C	4.56909e+23	C,A,C	G,C,G	7|0,2|0,9|0	F,F,F	F
25212	2	85827434	G	A	8582721485827720	C,T	G,A	9|0,3|0	F,F	F
25212	4	140405206	G	T	1.40405e+26	T,A,C	C,G,T	1|0,3|0,4|0	F,F,F	F
25212	5	76600724	G	A	7.66003e+31	G,C,T,T	C,T,C,G	1|0,0|2,4|0,0|4	M,M,M,M	M
25212	5	99442791	G	C	9.94424e+31	C,A,G,C	T,T,A,T	1|0,1|0,1|0,1|0	F,F,F,F	F
25212	6	15930211	G	A	15930087	G	C	0|8	F	F
25212	6	159801439	G	A	1.59801e+17	A,G	T,A	1|0,3|0	F,F	F
25212	9	61659596	G	A	6165927061659620	T,G	C,A	6|0,1|0	F,F	F
25212	9	61827351	T	C	61827669	C	T	0|6	F	F
25222	10	27296286	G	A	2.72959e+119	C,A,A,A,C,A,A,A,G,C,T,G,T,C,C	T,G,G,C,T,C,G,G,A,T,C,C,C,T,T	0|2,0|4,0|6,0|6,0|4,0|2,0|8,2|0,0|10,0|10,4|0,8|0,0|6,0|6,0|2	M,M,M,M,M,M,M,F,M,M,M,M,M,M,M	F,M
25222	10	27296289	G	T	2.72959e+119	C,A,A,A,C,A,A,A,G,C,T,G,T,C,C	T,G,G,C,T,C,G,G,A,T,C,C,C,T,T	0|2,0|4,0|6,0|6,0|4,0|2,0|8,2|0,0|12,0|12,5|0,9|0,0|8,0|8,0|2	M,M,M,M,M,M,M,F,M,M,M,M,M,M,M	F,M
25222	10	57430811	G	A	57431029	A	G	0|4	M	M
25222	14	120395400	C	T	120395201	A	G	0|6	F	F
25222	17	55500443	G	T	5.55003e+23	A,T,C	G,C,T	0|4,0|10,0|6	F,F,F	F
25222	2	77500119	G	C	7749995077500090	A,G	T,A	11|0,2|0	F,F	F
25222	3	4152485	C	T	4152546	T	G	1|0	F	F
25222	4	89961642	G	A	89961884	A	G	0|8	M	M
25222	5	99356378	G	A	9.9356e+23	G,T,T	C,C,C	2|0,0|10,1|0	M,M,M	M
25222	6	55288673	C	T	5528874455288880	C,C	T,G	0|2,13|0	F,F	F
25224	1	205292821	T	C	2.05293e+44	A,G,G,G,G	G,A,A,T,A	0|2,0|4,0|10,0|2,0|4	F,F,F,F,F	F
25224	1	217050745	T	A	217050736	A	G	1|0	M	M
25224	15	6478798	A	G	6.47847e+20	C,C,G	A,A,A	0|2,0|2,0|2	F,F,F	F
25224	17	92412117	A	G	9.24117e+31	A,C,C,G	T,T,A,A	1|0,0|10,0|2,0|2	F,F,F,F	F
25224	18	23817457	C	A	23817419	A	T	1|0	M	M
25224	4	109654146	T	A	1.09654e+17	A,C	G,T	0|4,0|4	F,F	F
25224	6	94644555	C	A	9.46442e+23	G,T,T	C,A,G	2|0,1|0,1|0	F,F,F	F
25224	7	71185153	G	T	71184885	A	G	1|0	M	M
25224	7	166901466	C	A	1.66901e+71	A,T,A,A,G,T,G,G	G,C,G,G,C,G,A,A	1|0,1|0,1|0,2|0,0|2,0|2,1|0,1|0	M,M,M,M,M,M,M,M	M
25224	9	133476411	G	A	1.33476e+26	T,T,G	C,C,A	1|0,1|0,1|0	F,F,F	F
25228	1	208106753	C	T	2.08106e+17	T,T	A,C	2|0,4|0	F,F	F
25228	4	100988755	T	C	1.00988e+17	T,A	C,T	1|0,11|0	F,F	F
25228	7	76865402	C	G	7686542976865580	G,G	A,A	1|0,0|2	M,M	M
25228	8	4830434	T	C	4.83014e+48	T,T,G,C,C,G,C	C,A,A,G,T,A,T	0|2,0|4,0|8,0|4,0|6,0|8,0|8	M,M,M,M,M,M,M	M
26025	1	5057689	A	G	5057475	T	G	0|8	F	F
26025	1	18301942	G	A	1.83016e+47	C,T,G,G,G,T	T,C,A,A,T,A	0|2,0|2,0|8,0|18,0|20,0|8	F,F,F,F,F,F	F
26025	1	117395098	G	A	117395369	T	C	1|0	M	M
26025	12	18689174	T	C	1.8689e+23	C,A,A	T,G,T	5|0,5|0,1|0	M,M,M	M
26025	12	85764991	A	G	85765003	T	C	1|0	F	F
26025	12	122978490	T	G	122978167	G	A	1|0	F	F
26025	14	112691570	T	A	112691719	G	A	7|0	F	F
26025	2	183210540	G	A	1.83211e+17	C,T	A,C	1|10,2|0	M,M	M
26025	3	32282823	G	A	3.22828e+23	A,A,C	G,C,A	0|2,0|2,0|2	F,F,F	F
26025	4	27200483	T	C	2720049827200520	A,G	G,A	2|0,0|8	M,M	M
26025	4	123148541	C	T	123148422	G	T	4|0	F	F
26025	4	138628959	G	T	1.38629e+71	T,A,C,A,T,C,C,A	C,G,T,G,A,T,T,G	1|0,0|2,0|2,0|2,0|2,1|0,1|0,1|0	M,M,M,F,F,F,F,F	F,M
26025	6	106045167	C	T	106045411	C	T	2|0	F	F
26025	8	7836929	C	A	7.83662e+34	A,G,C,G,T	T,A,T,A,C	2|0,1|0,4|0,4|0,2|0	M,F,M,F,M	F,M
26027	10	8262417	C	T	82619868262282	G,A	A,G	2|0,7|0	F,F	F
26027	13	100249083	G	T	1.00249e+35	A,T,T,A	G,C,C,G	4|0,6|0,6|0,3|0	F,F,F,F	F
26027	15	86616499	T	C	8.6616e+31	C,A,T,G	T,C,C,A	0|2,0|4,0|2,0|4	F,F,F,F	F
26027	3	66785997	A	G	6.67857e+23	A,T,T	C,G,G	1|0,1|0,2|0	F,F,F	F
26029	13	26967739	A	G	2.69675e+31	G,A,T,A	C,C,G,G	2|0,0|4,0|12,0|2	M,M,M,M	M
26029	16	32910008	C	T	3290998032910290	G,G	A,C	1|0,0|4	F,M	F,M
26029	16	32910043	C	T	3.291e+23	G,G,A	A,C,G	1|0,1|6,1|0	F,M,F	F,M
26029	18	32422213	A	G	3.2422e+23	C,G,G	G,A,A	0|6,0|12,0|8	F,F,F	F
26029	2	117234012	G	A	117234050	G	A	0|8	F	F
26029	3	14832350	C	T	14832684	A	G	0|2	F	F
26029	4	73323210	T	C	7.3323e+23	T,C,G	C,T,A	8|0,6|0,1|0	F,F,F	F
26029	7	144621842	G	A	144621783	C	T	4|0	F	F
26029	9	99682498	C	T	9968252299682530	A,G	T,A	3|0,3|0	F,F	F
26031	4	140057083	C	T	1.40057e+71	G,G,G,C,G,G,C,T	A,C,T,A,C,C,A,C	2|0,2|0,2|0,6|0,1|0,1|0,0|2,1|0	M,M,F,F,F,M,F,F	F,M
26031	6	67332249	G	A	6.73318e+23	G,C,C	A,T,T	1|0,0|10,0|2	F,F,F	F
26031	7	55972387	G	T	5597215855972280	C,C	A,T	9|0,7|0	F,M	F,M
26031	7	162785740	C	T	1.62785e+17	C,G	T,C	0|4,0|12	F,F	F
26031	8	8078355	G	A	8.0781e+76	C,C,C,C,G,T,C,G,G,C,G	G,G,T,G,A,C,T,A,A,T,T	6|0,4|0,2|0,5|0,0|6,5|0,4|0,3|0,1|0,1|0,1|0	M,F,M,M,M,M,F,F,F,F,F	F,M
26036	1	103083335	G	A	1.03083e+62	C,G,G,G,G,C,C	T,A,T,A,C,T,T	4|0,2|0,2|0,1|0,2|0,5|0,1|0	M,M,M,M,M,M,M	M
26036	10	43334135	T	A	43333896	C	A	6|0	F	F
26036	19	5038405	C	A	5.03841e+27	A,C,A,T	G,T,G,C	0|2,9|0,0|12,6|0	F,F,F,F	F
26036	4	140095137	A	G	1.40095e+224	C,A,C,T,G,G,C,A,A,A,A,T,T,T,C,G,C,G,A,C,C,C,A,A,G	T,C,T,C,A,A,T,G,G,T,T,G,A,C,A,C,A,C,G,G,G,G,G,G,C	1|0,0|2,0|2,0|2,2|0,6|0,3|0,3|0,5|0,5|0,6|0,9|0,9|0,6|0,6|0,6|0,5|0,5|0,3|0,1|0,1|0,1|0,1|0,1|0,1|0	M,F,F,M,M,M,M,M,M,M,M,M,M,M,M,M,M,M,M,M,M,M,M,M,M	F,M
26036	9	3264873	G	A	3.26457e+27	T,C,A,T	G,A,G,A	0|8,0|10,0|4,0|2	M,M,M,M	M
26039	10	77490227	C	T	7749010577490310	G,G	C,A	1|0,1|0	F,M	F,M
26039	15	108752019	A	G	1.08752e+17	T,C	C,T	1|0,2|0	M,M	M
26039	5	98528407	T	C	98528359	C	T	4|0	F	F
26039	9	51673679	A	G	5167356951673960	C,G	T,A	0|8,0|2	M,M	M
26040	18	63459251	C	T	63459176	A	C	0|4	F	F
26040	19	22487800	G	A	2.24874e+23	G,C,A	A,G,G	2|0,0|4,1|0	F,F,F	F
26040	2	192769779	C	T	1.9277e+17	C,A	T,G	2|0,4|0	F,F	F
26040	6	161596477	G	A	1.61596e+26	T,G,T	G,T,G	7|0,1|0,1|0	F,F,F	F
26040	8	124484806	G	A	1.24485e+17	T,T	C,G	4|0,0|2	M,M	M
26044	12	124674169	C	T	1.24674e+71	T,G,A,A,G,G,C,C	G,A,G,G,A,A,G,T	9|0,8|0,3|0,4|0,2|0,2|0,13|0,14|0	F,F,F,F,F,F,F,F	F
26044	2	31356980	T	C	3.13566e+31	G,A,T,G	A,G,C,A	1|0,0|6,2|0,7|0	M,M,M,M	M
26044	3	32936207	C	T	3293609832936600	C,C	A,T	1|0,0|2	F,M	F,M
26044	8	22871168	C	T	22871449	A	G	0|2	F	F
26045	13	17754708	G	C	1.77548e+39	A,A,A,C,G	G,G,T,T,C	0|4,0|4,0|2,1|0,1|0	M,F,M,M,M	F,M
26045	13	17754710	T	C	1.77548e+39	A,A,A,C,G	G,G,T,T,C	0|4,0|4,0|2,1|0,1|0	M,F,M,M,M	F,M
26045	13	31979321	G	T	31979106	T	C	0|10	F	F
26045	17	90784984	A	G	9078472790784730	C,C	T,T	5|0,0|8	F,F	F
26045	18	19317126	C	T	1931695019317340	G,C	T,T	0|6,0|6	F,F	F
26045	3	119401664	C	T	1.19401e+17	G,C	A,G	5|0,0|2	F,F	F
26045	4	140412197	G	A	1.40412e+35	G,C,T,T	A,T,C,C	0|4,0|2,0|6,0|6	F,F,F,F	F
26045	4	140412276	C	T	1.40412e+98	G,G,G,T,T,A,T,G,G,C,G	C,A,A,C,C,T,G,T,A,A,A	1|0,2|0,1|0,1|6,1|6,2|0,2|0,2|0,3|0,3|0,2|0	M,M,M,F,F,F,F,F,F,F,F	F,M
26045	4	140412277	A	G	1.40412e+98	G,G,G,T,T,A,T,G,G,C,G	C,A,A,C,C,T,G,T,A,A,A	1|0,2|0,1|0,1|6,1|6,2|0,2|0,2|0,3|0,3|0,2|0	M,M,M,F,F,F,F,F,F,F,F	F,M
26045	4	140412322	G	A	1.40412e+125	G,G,T,G,T,A,T,G,G,C,G,G,C,C	C,A,C,A,C,T,G,T,A,A,A,T,T,G	3|0,1|0,1|0,1|0,1|0,1|0,1|0,0|4,0|4,0|6,0|6,0|4,0|4,1|0	M,M,M,F,M,F,F,M,M,M,M,M,M,F	F,M
26045	5	12783754	T	G	1.27833e+87	A,G,G,C,A,C,T,T,A,T,G	G,C,A,A,T,T,G,C,C,C,A	1|0,14|0,17|0,2|0,2|0,1|0,13|0,12|0,0|2,3|0,3|0	F,F,F,F,F,F,F,F,F,F,F	F
26047	13	102021869	A	C	1.02022e+17	G,A	A,G	4|0,6|0	F,F	F
26047	16	30497723	T	C	3049764530497810	A,A	G,G	1|6,6|0	M,F	F,M
26047	18	9258114	C	T	9258012	A	G	4|0	F	F
26047	2	149773781	G	A	1.49774e+17	G,C	A,T	0|4,1|0	M,F	F,M
26047	7	67613964	C	T	67613775	C	A	6|0	F	F
26047	8	113560783	G	C	1.13561e+17	T,C	A,T	0|2,0|6	F,F	F
26048	1	50249846	C	T	5.02495e+47	T,G,G,G,T,G	G,T,A,A,C,A	0|2,0|6,0|2,0|2,0|8,0|8	F,F,F,F,F,F	F
26048	15	32504723	A	C	32504937	A	G	3|0	F	F
26048	8	7779088	T	A	7.77891e+34	C,C,T,T,C	A,G,C,C,T	0|8,0|8,1|0,1|0,2|0	M,M,M,M,M	M
26069	2	166319817	T	G	166319722	G	A	2|0	F	F
26069	4	136922399	A	G	1.36922e+53	C,C,T,G,A,G	T,T,C,A,T,A	0|2,1|0,1|0,4|0,8|0,1|0	M,M,M,F,M,M	F,M
26069	5	5417261	G	A	54173435417449	G,T	A,C	0|8,0|10	F,F	F
26069	8	21075118	G	A	2107499521075100	C,C	T,T	3|0,3|0	F,F	F
26069	9	765947	C	T	766106	A	G	2|0	F	F
26069	9	765992	C	T	766106	A	G	2|0	F	F
26709	1	6630227	A	G	6.62994e+27	G,A,A,A	C,T,G,G	0|4,0|8,0|12,0|8	F,F,F,F	F
26709	13	11684123	G	T	11684344	G	T	1|6	M	M
26709	2	173358944	C	T	1.73359e+26	T,G,G	C,A,C	1|0,0|12,11|0	F,F,F	F
26709	3	60256263	C	T	60256180	G	T	5|0	F	F
26709	3	103884755	C	T	103885094	C	A	2|0	F	F
26712	10	52175655	C	T	52175786	C	A	6|0	F	F
26712	16	70138034	A	C	7.01376e+39	T,C,C,C,A	G,T,T,T,G	0|2,0|6,0|4,0|4,0|2	F,F,F,F,F	F
26712	2	80975047	A	G	8097494080975440	G,C	C,T	6|0,1|0	F,F	F
26712	8	7779234	C	G	7779141	C	T	3|0	M	M
26714	1	46019955	T	G	4.60196e+39	G,T,G,A,C	T,C,T,G,T	0|2,0|2,0|4,0|4,0|2	F,F,F,F,F	F
26714	15	5662504	C	T	5.66217e+34	C,T,C,G,T	T,C,G,A,C	0|2,0|2,0|2,7|0,0|4	M,M,M,M,M	M
26714	16	30497723	T	C	3.04973e+47	A,C,A,A,C,T	G,T,G,G,T,C	1|0,0|2,0|2,2|0,2|0,1|0	M,M,M,F,F,M	F,M
26714	3	169456141	C	T	1.69456e+53	T,T,G,C,A,G	G,C,A,T,G,A	0|4,0|6,4|0,1|0,7|0,0|2	F,F,F,F,F,F	F
26714	4	140462941	A	G	1.40463e+143	T,A,C,G,G,A,A,A,G,G,G,A,G,C,C,G	C,G,G,A,A,T,C,G,A,C,T,G,C,T,T,A	1|0,1|0,2|0,2|0,2|0,3|0,3|0,1|6,9|0,1|6,0|6,0|6,7|0,1|0,1|0,0|2	M,F,M,M,M,F,F,F,F,F,F,F,F,M,M,F	F,M
26714	5	180114265	A	G	180114178	T	C	5|0	F	F
26714	9	129912548	G	A	1.29912e+17	G,C	A,T	0|8,0|2	M,M	M
26721	10	30518023	G	A	3.05179e+95	G,A,G,A,T,G,G,A,T,T,A,G	C,G,C,C,G,A,A,G,C,C,T,A	8|0,7|0,0|6,1|6,3|0,1|8,4|0,4|0,3|0,1|6,1|6,0|2	M,M,F,F,M,F,M,M,M,F,F,F	F,M
26721	10	30518024	A	C	3.05179e+95	G,A,G,A,T,G,G,A,T,T,A,G	C,G,C,C,G,A,A,G,C,C,T,A	8|0,7|0,0|6,0|6,2|0,0|8,3|0,3|0,3|0,1|6,1|6,0|2	M,M,F,F,M,F,M,M,M,F,F,F	F,M
26721	12	100480394	A	G	1.0048e+17	A,C	G,T	5|0,1|0	M,M	M
26721	13	59213854	T	C	5.92135e+31	A,T,A,C	T,C,T,A	1|0,3|0,4|0,7|0	F,F,F,F	F
26721	5	12937171	G	A	1.29369e+47	A,G,G,A,C,G	T,A,A,G,G,A	0|6,0|8,0|8,4|0,0|2,2|0	M,M,M,M,M,M	M
26721	5	64931195	G	A	6.49309e+55	C,G,A,T,G,G,C	T,A,G,G,A,C,T	0|4,0|6,0|4,0|2,0|10,0|8,0|8	F,F,F,F,F,F,F	F
26721	8	142540742	C	T	1.42541e+53	G,G,G,G,C,T	A,A,A,T,T,C	0|6,0|4,0|4,0|6,0|6,0|8	F,F,F,F,F,F	F
26726	1	220961178	C	T	2.20961e+35	T,C,C,A	G,T,A,G	3|0,5|0,2|0,2|0	M,M,M,M	M
26726	14	77975827	T	A	7797599677976050	C,T	G,C	0|8,0|8	M,M	M
26726	16	45338700	C	T	4.53384e+71	G,G,G,A,C,C,C,A,A	T,A,C,G,T,T,G,T,T	7|0,0|12,0|14,11|0,0|12,0|4,4|0,0|12,1|0	F,F,F,F,F,F,F,F,F	F
26726	3	12215744	C	T	12215350	A	G	1|0	M	M
26726	6	170947282	G	T	1.70947e+26	G,G,A	A,A,G	1|0,5|0,2|0	F,F,F	F
26726	7	168878245	G	A	1.68878e+62	C,A,C,G,G,T,G	T,G,G,A,T,C,A	1|0,1|0,1|0,1|0,3|0,4|0,4|0	M,M,M,M,M,M,M	M
26731	1	42937775	T	C	4293735842937540	G,C	A,T	1|0,12|0	F,F	F
26731	17	24300257	G	A	24300331	C	T	0|6	F	F
26731	17	37017632	A	G	37017666	A	C	0|2	M	M
26731	19	54051527	A	T	5.40514e+23	C,C,C	T,G,G	3|0,2|0,0|4	M,M,M	M
26731	6	95713003	A	C	9.57126e+31	T,C,G,A	C,A,A,G	1|0,8|0,8|0,2|0	F,F,F,F	F
26731	8	7757072	T	C	7757010	C	T	1|8	F	F
26732	15	103804917	G	A	1.03805e+26	G,T,C	C,C,G	2|0,13|0,0|4	F,F,F	F
26732	2	31356980	T	C	3.13568e+39	A,T,G,C,C	G,C,A,A,T	0|4,2|0,4|0,7|0,3|0	M,M,M,M,M	M
26732	4	11323923	A	C	1132402811324260	C,C	T,G	1|0,2|0	F,F	F
26732	4	28736894	C	T	2873670828737070	T,A	C,G	0|4,1|6	F,F	F
26732	7	75800928	G	A	75801026	C	T	5|0	F	F
26732	8	79547101	C	T	7954694379547200	A,C	G,A	10|0,0|2	F,F	F
28364	1	125760049	T	C	125760247	A	G	0|10	M	M
28364	10	48567364	G	A	4.8567e+23	G,G,T	A,A,C	6|0,0|12,3|0	M,M,M	M
28364	12	53962873	G	A	53962579	C	T	0|2	F	F
28364	12	55626940	A	G	5562659555627280	A,T	G,A	0|2,0|8	F,F	F
28364	15	35908201	T	C	3.59079e+23	A,T,G	G,C,T	0|4,4|0,5|0	M,M,M	M
28364	2	20968532	C	T	20968242	G	C	4|0	F	F
28364	2	150613123	C	T	1.50613e+35	T,C,C,A	C,A,T,C	3|0,1|0,3|0,2|0	F,F,F,F	F
28364	8	21022324	A	C	2.10219e+47	G,T,C,A,C,A	A,C,G,C,T,G	1|0,6|0,8|0,3|0,0|8,1|0	F,F,F,F,F,F	F
28364	8	139966237	G	A	139965921	T	C	4|0	F	F
28365	13	16437421	G	T	1643731416437390	C,T	G,C	6|0,2|0	F,F	F
28365	14	17484918	A	C	1.74845e+31	A,G,C,T	G,A,T,G	3|0,0|2,0|2,0|2	M,F,F,M	F,M
28365	15	92855886	G	A	9285562392856160	C,T	G,C	7|0,6|0	F,F	F
28365	17	8769997	C	A	8.76969e+41	T,C,C,C,A,T	C,G,G,T,G,C	3|0,4|0,5|0,1|0,1|0,8|0	F,F,F,F,F,F	F
28365	4	140462941	A	G	1.40463e+170	T,A,C,G,G,A,A,A,A,G,G,G,A,G,G,C,G,G,G	C,G,G,A,A,T,C,G,G,A,C,T,G,C,T,T,A,A,C	1|0,1|0,2|0,2|0,4|0,5|0,5|0,1|10,1|10,6|0,0|10,0|10,0|6,3|0,0|2,2|0,2|0,0|2,0|2	M,F,M,M,M,F,F,F,F,F,F,F,F,F,F,M,F,F,F	F,M
28365	5	50268930	C	T	5026861350268930	T,T	C,C	4|0,2|0	F,F	F
28365	6	121536151	C	T	121536027	G	A	3|0	F	F
28365	9	85159345	G	T	85159166	T	A	3|0	F	F
28378	12	31800249	A	G	31800360	C	T	7|0	M	M
28378	13	7718668	C	G	7.71831e+20	A,G,T	C,A,C	5|0,3|0,2|0	F,F,F	F
28378	13	17526153	C	T	1.75257e+175	C,G,T,T,T,T,T,C,A,T,A,G,G,C,C,G,C,C,C,C,C,T	T,A,C,G,A,C,C,T,G,C,G,T,C,T,A,A,T,T,G,T,A,C	1|0,1|0,3|0,4|0,5|0,5|0,5|0,5|0,5|0,5|0,3|0,3|0,3|0,3|0,4|0,4|0,4|0,4|0,1|0,1|0,2|0,3|0	M,M,M,M,M,M,M,M,M,M,M,M,M,M,M,M,M,M,M,M,M,M	M
28378	14	71763236	C	T	7176302871763160	T,G	C,A	0|8,0|2	F,F	F
28378	19	54420366	A	T	5.44201e+63	A,G,T,G,G,C,G,A	G,T,C,C,A,T,A,G	0|2,0|2,1|0,0|2,1|6,1|6,1|6,4|0	F,F,M,M,M,M,M,F	F,M
28378	2	191121686	C	T	191121878	A	G	0|8	M	M
28378	6	165443172	G	A	165443330	T	C	5|0	F	F
28378	7	8372047	T	A	83716898371719	A,A	G,G	3|0,6|0	F,F	F
28378	7	168472630	A	G	1.68472e+89	G,T,A,C,C,G,C,T,T,G	A,A,G,G,G,T,T,C,C,A	1|0,2|0,1|0,1|0,3|0,3|0,2|0,2|0,1|0,1|0	M,M,M,M,M,M,M,M,M,M	M
28389	1	143323583	T	C	1.43323e+80	G,C,G,A,C,C,G,G,C	A,T,A,G,A,T,T,C,T	2|0,3|0,4|0,3|0,3|0,3|0,2|0,1|0,1|0	F,F,F,F,F,F,F,F,F	F
28389	1	150808210	T	C	150807824	A	T	2|0	M	M
28389	10	38523923	C	G	38524085	T	C	2|0	M	M
28389	13	85880800	G	A	8.58804e+39	G,C,C,A,C	A,T,T,G,T	0|2,3|0,0|2,0|2,11|0	F,F,F,F,F	F
28389	14	109322488	C	T	109322378	C	T	5|0	F	F
28389	2	181245053	G	A	1.81245e+35	A,G,C,C	G,A,G,*	0|2,9|0,0|8,0|6	F,F,F,F	F
28389	20	65060668	C	T	6.50604e+31	A,C,T,C	T,T,C,G	4|0,7|0,0|2,1|0	M,M,M,M	M
28389	4	154496526	C	T	1.54496e+26	C,G,A	T,A,G	0|2,0|6,3|0	F,F,F	F
28389	9	61853313	G	A	6.18531e+31	A,C,G,C	C,T,A,T	0|6,0|6,0|4,9|0	F,F,F,F	F
29472	10	36114476	A	C	3611475936114780	C,T	A,C	4|0,0|8	M,M	M
29472	10	51233974	T	C	5123376851233830	A,A	C,C	0|4,1|0	F,F	F
29472	11	72781024	C	G	7278121672781340	C,C	T,T	0|10,2|0	M,M	M
29472	12	22126579	A	G	22126385	G	A	3|0	F	F
29472	4	107557590	G	A	1.07557e+17	T,G	C,C	4|0,0|2	F,F	F
29472	5	1053301	C	T	1052935	C	T	2|0	F	F
29472	8	96129455	A	G	9.61292e+23	C,G,T	T,A,C	0|4,0|2,0|6	F,F,F	F
29472	9	45826244	A	T	4.5826e+23	T,C,C	C,A,T	11|0,1|8,2|0	M,M,M	M
29472	9	52857313	C	T	5.28572e+23	T,A,C	C,G,T	0|2,0|2,5|0	M,M,M	M
30547	10	93766720	G	A	93766353	C	T	7|0	F	F
30547	11	29517769	C	T	2951740029518150	T,C	G,T	0|2,0|4	M,M	M
30547	11	92138669	G	A	9213860392138960	T,C	C,A	0|8,5|0	M,M	M
30547	11	97063770	G	A	97063684	T	C	3|0	M	M
30547	11	131346845	C	T	1.31346e+53	A,C,A,T,T,A	G,T,G,C,C,G	2|0,4|0,5|0,6|0,3|0,0|2	M,M,M,M,M,M	M
30547	12	22387646	G	A	2.23872e+23	T,G,C	C,C,T	0|2,0|2,0|2	F,F,F	F
30547	12	43229724	C	T	4322938843229940	T,C	G,A	0|6,4|0	M,M	M
30547	12	99636307	G	A	9.96361e+31	T,A,G,A	C,G,C,T	5|0,1|0,2|0,0|2	M,M,M,M	M
30547	14	99677613	G	A	9.96772e+23	G,G,C	A,A,T	2|0,0|4,7|0	F,F,F	F
30547	15	98314081	G	A	98313652	G	A	0|2	M	M
30547	18	7983905	G	A	7983653	G	A	8|0	M	M
30547	2	2859014	G	A	2.85873e+34	G,G,G,G,G	A,A,A,C,T	9|0,8|0,2|0,2|0,7|0	M,M,M,M,M	M
30547	2	4616496	A	G	4616652	C	G	1|0	F	F
30547	2	22548697	A	C	2.25483e+23	A,G,C	C,A,T	0|4,0|6,6|0	M,M,M	M
30547	2	39427718	G	A	39427604	A	G	1|0	M	M
30547	2	142097458	G	A	1.42097e+17	T,C	C,A	0|12,0|6	M,M	M
30547	2	178916810	C	T	1.78916e+53	G,G,G,C,A,C	A,A,C,T,T,T	1|0,0|12,1|0,2|0,1|0,0|2	M,M,M,M,M,M	M
30547	3	64567708	C	T	6.45674e+31	C,G,C,G	G,T,T,A	0|6,0|12,0|6,0|4	M,M,M,M	M
30547	5	130871912	C	T	130871591	A	G	3|0	M	M
30547	6	31151783	G	A	31151686	A	C	2|0	F	F
30547	7	120823247	G	A	1.20823e+26	A,T,G	G,G,A	2|0,0|6,0|6	M,M,M	M
30547	8	1530247	C	T	1.52984e+41	C,G,G,T,C,T	T,A,A,C,T,G	1|0,6|0,0|2,4|0,7|0,0|4	M,M,M,M,M,M	M
30547	8	5510983	G	A	5511021	G	A	1|0	M	M
30547	8	105365862	C	T	105365793	C	T	2|0	M	M
30547	8	135559121	C	T	1.35559e+17	G,C	T,T	3|0,0|4	M,M	M
30547	9	45732000	T	C	45732359	T	C	0|8	F	F
30547	9	51903471	G	A	5.19034e+47	G,C,A,A,C,T	A,T,C,T,T,C	1|0,1|0,5|0,3|0,3|0,1|0	M,M,M,M,M,M	M
30547	9	88135096	C	T	88135266	A	G	3|0	M	M
30547	9	132509109	C	T	132509382	C	T	5|0	M	M
31204	1	25870664	C	T	2.58705e+31	A,A,G,T	G,G,A,A	0|2,1|0,8|0,0|2	F,F,F,F	F
31204	12	53310764	T	C	53310600	C	T	11|0	F	F
31204	14	23402570	G	A	2340263423402710	T,T	A,A	2|0,6|0	F,F	F
31204	14	121464126	C	T	1.21464e+35	A,G,A,G	G,A,C,C	4|0,0|6,2|0,1|0	F,F,F,F	F
31204	18	32149078	T	C	32149346	C	A	8|0	F	F
31204	20	24479404	A	G	2.44791e+31	C,A,G,A	T,G,C,T	8|0,2|0,11|0,8|0	F,F,F,F	F
31204	20	58214110	C	T	5.82139e+23	A,G,G	G,A,C	8|0,5|0,2|0	F,F,F	F
31204	4	136905896	G	C	136905476,136905493,136905541,136905574,136905580,136905696,136905709,136905748,136905768,136905773,136905786,136905791,136905793,136905799,136905811,136905857,136905900,136905953,136905958,136905968,136905983,136905986,136906018,136906024,136906036,136906106,136906127,136906156,136906171,136906189,136906196,136906226,136906236,136906257,136906274,136906275,136906280,136906301,136906313,136906321…	T,T,A,G,A,T,G,A,G,C,T,C,T,T,C,G,T,T,C,T,T,A,G,T,C,C,T,A,A,T,C,G,A,G,A,G,G,A,G,C,C,A	C,C,G,A,T,C,A,C,A,A,C,A,A,G,T,A,C,C,T,C,G,G,A,C,T,G,C,G,G,C,T,A,G,C,C,A,A,T,A,A,T,T	1|0,1|0,1|0,1|0,1|0,11|0,11|0,13|0,10|0,10|0,9|0,8|0,8|0,6|0,4|0,3|0,1|0,1|0,1|0,1|0,1|0,1|0,3|0,3|0,3|0,6|0,9|0,7|0,5|0,3|0,2|0,1|0,1|0,1|0,1|0,1|0,1|0,1|0,1|0,1|0,1|0,1|0	M,M,M,M,M,M,M,M,M,M,M,M,M,M,M,M,M,M,M,M,M,M,M,M,M,M,M,M,M,M,M,M,M,M,M,M,M,M,M,M,M,M	M
31204	4	136905905	A	C	136905476,136905493,136905541,136905574,136905580,136905696,136905709,136905748,136905768,136905773,136905786,136905791,136905793,136905799,136905811,136905857,136905896,136905900,136905953,136905958,136905968,136905983,136905986,136906018,136906024,136906036,136906106,136906127,136906156,136906171,136906189,136906196,136906226,136906236,136906321,136906324,136906336,136906337	T,T,A,G,A,T,G,A,G,C,T,C,T,T,C,G,G,T,T,C,T,T,A,G,T,C,C,T,A,A,T,C,G,A,C,C,C,A	C,C,G,A,T,C,A,C,A,A,C,A,A,G,T,A,A,C,C,T,C,G,G,A,C,T,G,C,G,G,C,T,A,G,A,T,T,G	1|0,1|0,1|0,1|0,1|0,12|0,11|0,13|0,11|0,11|0,10|0,9|0,9|0,7|0,5|0,4|0,1|0,1|0,1|0,1|0,1|0,1|0,1|0,3|0,3|0,3|0,7|0,11|0,10|0,6|0,5|0,4|0,1|0,1|0,2|0,2|0,2|0,2|0	M,M,M,M,M,M,M,M,M,M,M,M,M,M,M,M,M,M,M,M,M,M,M,M,M,M,M,M,M,M,M,M,M,M,M,M,M,M	M
31204	4	138538207	G	T	1.38538e+71	C,G,C,C,T,G,G,G	G,C,T,T,C,A,A,A	7|0,7|0,6|0,1|0,0|2,0|2,0|2,1|0	F,F,F,M,M,M,M,M	F,M
31204	5	131197770	A	G	1.31197e+44	G,C,A,C,G	C,G,G,T,A	1|0,0|2,7|0,4|0,1|0	F,F,F,F,F	F
31204	9	66021234	G	A	66021601	C	G	5|0	M	M
31259	1	19338521	G	A	1.93381e+31	G,C,C,A	C,T,G,T	1|0,8|0,8|0,8|0	F,F,F,F	F
31259	11	14854714	T	C	14855019	G	A	1|0	F	F
31259	17	55119623	C	T	5.51196e+23	T,G,C	C,C,T	1|0,4|0,3|0	F,F,F	F
31259	4	71894958	C	T	7189518071895400	A,A	C,C	3|0,1|0	F,F	F
31260	12	324744	C	T	3.24515e+29	A,C,G,C,A	C,T,C,A,G	0|10,1|10,4|0,4|0,0|2	F,F,F,F,F	F
31260	14	17484918	A	C	17484813	A	G	0|2	M	M
31260	6	168379620	A	G	1.68379e+35	A,T,G,A	G,A,T,C	0|2,0|4,0|4,0|4	F,F,F,F	F
31260	7	73689414	C	T	73689432	A	C	3|0	F	F
31260	7	159370216	G	A	159370323	T	A	0|2	F	F
31261	12	15508904	A	G	1550921515509210	T,A	C,T	0|2,1|0	M,M	M
31261	13	101676347	A	G	101676172	C	G	0|8	F	F
31261	16	32961032	T	G	3.29606e+55	C,C,A,C,A,G,C	G,A,G,T,G,A,T	0|4,0|4,2|0,1|0,1|0,8|0,2|0	F,F,M,M,M,F,M	F,M
31261	4	164131980	G	A	1.64132e+26	T,G,G	C,A,C	0|2,0|6,0|6	F,F,F	F
31261	5	141102018	T	C	1.41102e+17	T,T	C,C	5|0,0|6	M,M	M
31261	7	83991938	G	T	8.39917e+63	A,G,A,C,G,T,A,C	G,A,T,T,A,G,G,G	2|0,0|2,0|2,1|0,3|0,3|0,2|0,3|0	F,F,F,F,F,F,F,F	F
31261	8	4258431	T	C	4258139	A	C	9|0	F	F
31262	10	80636835	C	T	80636972	T	C	5|0	M	M
31262	10	94730638	C	T	9.47304e+23	A,A,T	G,C,C	6|0,9|0,9|0	F,F,F	F
31262	11	10263498	T	C	10263464	G	A	0|2	M	M
31262	11	10263502	A	C	10263464	G	A	0|2	M	M
31262	12	63607208	C	T	6360740863607570	C,C	G,T	13|0,3|0	F,F	F
31262	12	105194912	A	C	1.05195e+17	C,A	T,T	4|0,6|0	F,F	F
31262	14	90591247	T	C	9.05913e+23	G,C,T	C,T,A	2|0,0|4,8|0	M,M,M	M
31262	4	91746994	A	G	9.17467e+55	C,A,T,G,G,G,C	T,G,G,C,A,A,T	4|0,5|0,0|2,0|4,0|4,1|0,1|0	M,M,M,M,M,M,M	M
31262	4	91746995	G	T	9.17467e+55	C,A,T,G,G,G,C	T,G,G,C,A,A,T	3|0,4|0,0|2,0|4,0|4,1|0,1|0	M,M,M,M,M,M,M	M
31262	4	138559758	G	C	1.38559e+107	T,T,G,C,G,G,C,G,T,G,G,C	C,C,A,T,C,A,G,A,C,T,A,T	1|0,1|0,1|0,3|0,1|0,6|0,3|0,1|0,0|8,0|8,1|10,7|0	F,F,F,F,M,M,M,F,F,F,M,M	F,M
31263	17	79251590	G	A	7925126379251800	A,G	C,T	2|0,10|0	M,M	M
31263	2	54872614	T	C	5487225454872420	T,G	C,C	6|0,5|0	F,F	F
31263	2	79374022	C	T	7937405879374220	G,C	A,T	1|0,0|4	F,F	F
31263	20	63282403	T	C	6.32821e+87	T,C,C,A,A,A,G,C,T,A,A	A,A,T,G,T,T,A,T,A,G,C	4|0,7|0,9|0,5|0,5|0,4|0,2|0,2|0,12|0,7|0,2|0	F,F,F,F,F,F,F,F,F,F,F	F
31263	3	153619147	C	T	1.53619e+53	A,C,C,G,A,T	G,T,T,A,G,G	1|0,3|0,4|0,11|0,6|0,2|0	F,F,F,F,F,F	F
31263	4	138538099	G	A	1.38538e+62	T,C,G,C,G,G,G	G,G,C,T,A,A,A	0|8,4|0,4|0,1|0,1|0,0|2,0|2	M,F,F,F,F,M,M	F,M
31263	4	140294614	C	T	1.40294e+71	T,T,G,C,C,T,G,C	C,C,C,G,A,C,C,G	2|0,1|8,1|0,1|0,1|0,1|0,1|0,3|0	M,F,M,M,M,M,M,M	F,M
31263	7	75007314	C	T	75006877	G	C	0|2	F	F
31263	8	143683227	G	A	1.43683e+17	G,A	A,T	12|0,0|4	M,M	M
31503	10	30005157	G	C	3.00049e+47	A,G,G,G,T,A	G,A,C,T,C,G	1|0,10|0,9|0,2|0,4|0,7|0	F,F,F,F,F,F	F
31503	13	28485296	G	A	2848533228485520	A,C	G,T	0|4,0|4	F,F	F
31503	15	65412240	G	A	6541241465412450	C,A	T,T	13|0,5|0	F,F	F
31503	19	29705275	T	C	2.97052e+47	G,T,C,G,A,A	T,G,T,A,C,G	10|0,0|8,4|0,10|0,0|2,1|0	F,F,F,F,F,F	F
31503	20	47185409	C	A	47185748	C	T	0|2	F	F
31503	5	30729375	C	A	3.07291e+63	C,G,C,C,T,G,C,T	T,A,T,T,C,A,A,C	3|0,6|0,8|0,0|14,3|0,5|0,11|0,8|0	F,F,F,F,F,F,F,F	F
31503	6	65957557	A	G	65957824	C	T	4|0	F	F
31503	7	138448021	C	T	1.38448e+17	G,G	C,A	2|0,3|0	F,F	F
31503	9	133441358	G	A	1.33441e+53	G,G,C,A,C,A	A,C,T,G,T,C	5|0,14|0,14|0,5|0,2|0,2|0	M,M,M,M,M,M	M
31883	1	27328424	A	G	27328500	A	T	0|2	M	M
31883	13	11706523	C	T	1170623311706340	C,G	T,A	0|4,4|0	M,M	M
31883	3	180500880	G	C	1.80501e+62	T,G,T,A,A,G,A	G,A,A,G,G,A,G	2|0,2|0,2|0,1|0,7|0,8|0,2|0	F,F,F,F,F,F,F	F
31883	4	140410247	A	T	1.4041e+26	A,T,C	C,C,A	1|0,2|0,0|2	M,F,M	F,M
31883	5	21804126	G	A	21803747	G	C	2|0	F	F
31883	6	139116276	G	A	139116200	C	T	0|2	F	F
31883	8	7750392	C	T	7.7501e+69	C,C,C,C,G,T,T,G,G,C	T,G,A,T,C,A,C,A,A,A	4|0,5|0,1|6,1|6,3|0,3|0,2|0,1|0,1|0,1|0	F,F,F,F,F,F,F,F,M,M	F,M
31885	12	42753323	C	T	42753389	C	T	0|2	F	F
31885	12	73248452	G	A	7324859273248690	A,A	C,G	1|0,5|0	F,F	F
31885	15	72200099	C	T	7.21996e+39	A,G,C,A,G	G,T,A,G,A	1|0,4|0,7|0,0|6,4|0	F,F,F,F,F	F
31885	2	149047721	A	G	1.49047e+17	T,T	C,C	2|0,8|0	F,F	F
31885	3	135564363	C	T	135564031	G	A	4|0	F	F
31885	4	46248899	G	A	4.62485e+39	C,T,C,G,A	T,A,T,A,T	0|2,1|0,2|0,9|0,0|10	F,F,F,F,F	F
31886	10	98957529	G	A	98957189	G	A	0|8	F	F
31886	12	76520204	G	T	7.65203e+23	T,T,C	C,C,T	3|0,1|0,1|0	F,F,F	F
31886	4	136923711	C	T	1.36923e+152	T,T,C,A,T,T,C,T,G,A,C,G,T,T,A,G,C	G,C,T,G,C,G,G,A,A,G,T,A,C,A,C,A,T	5|0,7|0,7|0,11|0,5|0,5|0,3|0,5|0,5|0,2|0,2|0,5|0,6|0,7|0,7|0,6|0,3|0	M,M,M,M,M,M,M,M,M,M,M,M,M,M,M,M,M	M
31886	4	136923712	A	G	1.36923e+152	T,T,C,A,T,T,C,T,G,A,C,G,T,T,A,G,C	G,C,T,G,C,G,G,A,A,G,T,A,C,A,C,A,T	5|0,7|0,7|0,11|0,5|0,5|0,3|0,5|0,5|0,2|0,2|0,5|0,6|0,7|0,7|0,6|0,3|0	M,M,M,M,M,M,M,M,M,M,M,M,M,M,M,M,M	M
31887	1	41487354	A	T	4.14871e+31	T,G,G,G	A,A,A,T	8|0,4|0,0|4,2|0	F,F,F,F	F
31887	11	126430853	T	A	1.2643e+62	G,C,T,G,C,T,A	C,G,C,A,T,C,G	1|0,2|0,5|0,3|0,2|0,2|0,2|0	M,M,M,M,M,M,M	M
31887	11	126430855	A	G	1.2643e+62	G,C,T,G,C,T,A	C,G,C,A,T,C,G	1|0,2|0,5|0,3|0,2|0,2|0,2|0	M,M,M,M,M,M,M	M
31887	14	125793249	C	T	1.25793e+35	T,T,C,A	A,A,T,C	0|6,4|0,2|0,6|0	F,F,F,F	F
31887	4	111787193	C	A	1.11787e+17	T,G	C,A	0|8,0|2	F,F	F
31887	4	138386941	C	A	1.38387e+107	T,A,A,T,C,G,C,A,A,A,T,T	A,T,G,C,A,A,T,T,C,T,C,C	2|0,2|0,1|0,2|0,0|4,3|0,0|2,0|2,0|2,10|0,1|0,0|2	M,M,F,F,F,M,F,F,M,M,M,M	F,M
31887	4	138559468	G	A	1.38559e+143	A,T,G,C,T,C,T,G,C,T,G,A,G,G,C,G	G,C,T,A,C,T,A,T,T,C,T,G,A,C,T,A	2|0,3|0,3|0,0|4,3|0,3|0,1|0,0|2,1|0,0|2,0|2,1|0,1|0,0|2,0|2,0|2	M,M,M,F,F,F,F,M,M,F,F,M,M,F,F,M	F,M
31887	4	138559485	A	G	1.38559e+161	A,T,G,T,G,C,C,C,T,G,C,T,G,A,G,G,C,G	G,C,T,C,T,A,G,T,A,T,T,C,T,G,A,C,T,A	2|0,3|0,3|0,2|0,3|0,0|2,1|0,2|0,3|0,0|6,3|0,0|6,0|6,3|0,3|0,0|6,0|6,0|6	M,M,M,M,M,F,F,F,F,M,M,F,F,M,M,F,F,M	F,M
31887	6	178419499	G	A	178419730	C	T	4|0	M	M
31887	7	168882323	C	A	1.68882e+98	A,A,C,T,T,C,T,A,C,A,C	G,G,A,G,C,G,C,T,T,G,G	7|0,4|0,3|0,3|0,6|0,4|0,3|0,3|0,3|0,2|0,1|0	M,M,M,M,M,M,M,M,M,M,M	M
31887	7	168882347	T	G	1.68882e+116	A,A,C,T,T,C,T,A,C,A,C,T,T	G,G,A,G,C,G,C,T,T,G,G,C,C	8|0,6|0,1|0,1|0,6|0,6|0,6|0,6|0,6|0,5|0,4|0,2|0,1|0	M,M,M,M,M,M,M,M,M,M,M,M,M	M
31887	8	7779186	T	A	7.77873e+69	C,C,T,C,T,T,T,T,A,T	G,G,C,G,C,C,C,C,G,C	1|0,1|10,6|0,1|8,1|8,3|0,1|0,3|0,0|2,0|2	M,M,M,M,M,M,M,M,M,F	F,M
31887	9	42145700	C	A	4214578142145860	C,G	G,A	1|0,5|0	F,F	F
31970	10	14695023	G	A	14695323	A	G	1|0	F	F
31970	12	55822925	G	A	5.58226e+39	G,C,G,A,G	A,T,A,T,A	0|2,4|0,0|6,0|6,0|4	M,M,M,M,M	M
31970	12	123245161	C	T	123244945	A	G	1|0	F	F
31970	13	11709190	C	T	1170938111709410	G,C	C,G	6|0,3|0	F,F	F
31970	14	55216621	G	A	55216628	A	G	2|0	M	M
31970	14	98665815	C	T	9.86655e+23	G,A,G	T,C,A	6|0,6|0,6|0	M,M,M	M
31970	15	36636708	C	T	3.66368e+23	G,C,G	A,T,A	0|8,0|8,0|2	M,M,M	M
31970	15	108616441	C	T	108616485	A	G	0|6	M	M
31970	16	34480819	G	A	34480603	A	G	0|6	F	F
31970	16	43094091	G	A	43094271	A	C	7|0	M	M
31970	16	47313297	G	T	4.73133e+23	T,A,T	G,G,C	4|0,4|0,13|0	M,M,M	M
31970	16	60612444	C	T	6.06121e+23	G,G,T	C,C,G	0|4,0|4,0|10	M,M,M	M
31970	17	30403040	C	T	30403070	T	C	1|0	M	M
31970	18	19845830	G	A	1.98456e+23	G,A,G	A,G,A	6|0,0|4,2|0	M,M,M	M
31970	2	61617714	G	A	6.16173e+31	A,T,A,G	G,C,T,A	1|0,0|2,0|2,1|0	M,M,M,M	M
31970	20	72405540	C	T	7240557072405650	C,C	T,T	0|2,0|8	F,F	F
31970	3	34287331	A	G	3428713934287320	A,T	G,C	7|0,1|0	F,F	F
31970	4	4139627	G	A	41397614139882	C,C	T,T	9|0,0|4	M,M	M
31970	5	157155234	G	A	1.57155e+26	C,G,A	A,C,T	1|0,8|0,9|0	F,F,F	F
31970	6	88935671	C	T	8893553088935630	T,A	G,G	0|4,0|2	F,F	F
31970	6	142394366	C	T	1.42394e+44	C,A,C,C,T	T,T,G,T,A	3|0,0|4,5|0,5|0,2|0	M,M,M,M,M	M
31970	7	10869316	A	C	1.08694e+23	C,T,T	T,G,C	4|0,9|0,10|0	F,F,F	F
31970	7	61810614	C	T	61810504	C	T	0|2	M	M
31970	7	73281802	C	T	7328140473281630	G,C	A,T	1|0,9|0	M,M	M
31970	8	3719723	G	A	37193563719445	C,G	T,A	0|4,0|12	F,F	F
31970	8	4818714	C	T	48183134818723	C,T	T,C	0|2,0|2	M,M	M
31970	9	124991411	G	A	1.24992e+44	A,T,G,C,C	G,C,C,T,T	0|14,0|14,0|12,0|12,0|2	M,M,M,M,M	M
31970	9	130355067	C	T	130355145	A	C	4|0	M	M
31971	1	157200837	G	A	157200999	A	G	0|4	F	F
31971	15	24287194	C	T	24287074	C	G	0|8	F	F
31971	20	7769759	T	A	7769983	T	C	0|4	F	F
31971	4	140451985	A	G	1.40452e+44	C,T,C,G,C	T,C,T,A,G	2|0,1|6,2|0,5|0,1|6	M,M,M,M,M	M
31971	5	96945847	C	T	9.69456e+23	A,G,G	G,A,A	12|0,4|0,2|0	F,F,F	F
31971	7	53359518	G	A	5.33593e+23	G,C,C	T,T,T	8|0,7|0,0|4	F,F,F	F
31971	8	7750392	C	T	7.75e+125	T,C,A,G,G,A,G,G,C,G,T,A,C,T,C,T,G,C	A,G,G,A,A,G,A,T,A,A,C,C,T,A,A,G,T,G	1|0,1|0,1|0,1|0,1|0,2|0,3|0,3|0,3|0,3|0,4|0,1|8,3|0,2|0,2|0,0|2,0|2,0|2	M,M,M,M,M,M,M,M,M,M,F,F,F,M,M,F,F,F	F,M
31971	8	51156127	C	G	51156271	G	A	1|10	M	M
31971	9	46002316	G	A	4.60019e+23	A,C,C	G,T,T	1|0,1|0,2|0	M,M,M	M
31971	X	25336624	A	G	2.53366e+23	A,A,A	C,T,G	3|0,2|0,4|0	F,F,F	F
32190	1	38850354	C	T	3.885e+47	C,C,C,T,C,G	T,A,T,C,T,T	1|0,2|0,2|0,3|0,3|0,5|0	M,M,M,M,M,M	M
32190	12	91351176	C	A	91351481	A	G	0|2	F	F
32190	17	69585537	T	A	6.95852e+31	C,T,A,T	G,C,C,C	5|0,9|0,9|0,3|0	F,F,F,F	F
32190	4	107569996	T	C	107569689	C	T	2|0	F	F
32190	8	7750392	C	T	7.7503e+34	C,A,C,A,G	T,C,A,G,A	0|2,1|0,1|0,1|0,1|0	F,M,M,M,M	F,M
32193	13	10833100	C	T	1.08329e+55	C,A,T,T,A,A,T	T,C,C,G,C,G,G	4|0,6|0,0|8,6|0,10|0,11|0,16|0	F,F,F,F,F,F,F	F
32193	16	32536389	C	G	3.2536e+71	C,G,C,C,C,G,G,A,G	T,A,A,G,A,A,T,T,A	1|0,10|0,10|0,4|0,0|4,2|0,0|4,0|4,2|0	M,M,M,M,F,M,F,F,F	F,M
32193	19	54051527	A	T	5.40513e+55	C,T,G,C,C,G,G	T,C,C,A,G,A,C	0|2,0|2,1|0,1|0,0|6,17|0,5|0	M,M,F,M,M,M,F	F,M
32193	20	33455463	T	C	3.34552e+39	T,A,C,C,T	A,G,A,G,C	3|0,2|0,2|0,0|2,5|0	M,M,M,M,M	M
32193	4	138374306	T	A	1.38374e+62	C,C,C,A,T,T,T	T,G,T,G,G,C,G	3|0,5|0,3|0,2|0,0|2,0|2,1|0	M,M,M,M,F,F,M	F,M
32193	4	138374324	C	T	1.38374e+44	C,C,C,A,T	T,G,T,G,G	3|0,6|0,5|0,4|0,1|0	M,M,M,M,M	M
32193	6	146352288	G	T	1.46352e+17	A,T	T,C	1|0,5|0	F,F	F
32193	8	29769582	A	G	2.97692e+31	T,T,A,A	A,C,G,G	1|0,0|2,0|12,0|2	F,F,F,F	F
32194	11	54621980	G	A	54622107	A	G	7|0	F	F
32194	20	62825536	G	A	6.28253e+31	A,C,G,T	G,G,A,C	0|8,2|0,8|0,0|2	F,F,F,F	F
32195	14	104459353	G	A	1.04459e+17	T,T	C,C	0|4,0|2	M,M	M
32195	16	44128186	C	A	4.4128e+31	T,G,A,T	G,A,G,C	7|0,0|6,0|4,3|0	F,F,F,F	F
32195	2	13411873	C	T	1341194213412120	A,A	G,T	3|0,9|0	F,F	F
32195	5	111314179	G	A	111314266	G	A	5|0	F	F
32195	6	9438745	G	A	9.43857e+20	G,C,A	A,G,G	0|8,0|2,1|0	F,F,F	F
32195	8	1487941	G	A	1487587	T	G	2|0	M	M
32196	13	57303388	T	C	5.73031e+47	T,T,T,A,T,C	C,C,C,C,C,T	0|4,0|6,0|8,0|4,0|2,0|6	F,F,F,F,F,F	F
32196	14	97203395	A	G	97203329	T	A	3|0	F	F
32196	19	43138113	C	G	4.31378e+95	G,G,T,T,G,A,A,C,A,C,G,G	C,C,C,C,A,G,G,T,G,A,A,C	1|0,2|0,2|0,2|0,2|0,1|0,1|0,1|0,1|0,3|0,5|0,6|0	M,M,M,M,M,M,M,M,M,M,M,M	M
32196	19	54420366	A	T	5.44202e+39	C,T,T,A,G	G,C,G,G,C	7|0,7|0,6|0,7|0,7|0	M,M,M,M,M	M
32196	7	168947283	T	C	168946826,168946844,168946849,168946887,168946944,168946970,168946984,168946988,168947046,168947067,168947106,168947121,168947145,168947166,168947171,168947183,168947235,168947257,168947261,168947264,168947277,168947368,168947436,168947442,168947477,168947485,168947498,168947503,168947513	T,G,A,G,A,G,C,T,T,T,T,A,C,T,T,A,C,G,G,A,G,G,G,G,T,G,T,G,G	C,C,C,A,G,C,A,A,G,A,C,G,T,C,C,G,T,C,T,G,C,C,A,C,A,C,C,A,T	0|2,0|4,0|4,0|2,7|0,7|0,7|0,6|0,14|0,15|0,12|0,11|0,9|0,5|0,5|0,0|4,0|4,0|4,0|4,0|2,0|2,4|0,7|0,0|8,5|0,0|8,7|0,0|10,5|0	M,M,F,F,M,M,M,M,M,M,M,M,M,M,M,F,F,M,M,M,M,M,M,M,M,M,M,M,M	F,M
32221	15	42157328	T	G	4215687842157710	C,G	T,T	0|2,2|0	F,F	F
32221	17	90443499	G	A	9.04433e+31	T,A,G,C	C,C,C,T	0|6,11|0,10|0,3|0	F,F,F,F	F
32221	17	90443500	C	T	9.04433e+31	T,A,G,C	C,C,C,T	0|6,11|0,10|0,3|0	F,F,F,F	F
32221	4	23274733	C	A	23274757	G	A	1|0	F	F
32221	4	76574513	C	T	7657414776574570	G,C	A,T	0|2,0|2	F,F	F
32221	4	138386910	A	G	1.38387e+71	T,A,T,A,T,G,A,A	C,G,C,T,C,A,G,G	0|4,0|2,0|2,0|2,0|2,6|0,0|10,6|0	M,M,M,M,M,M,M,M	M
32221	6	50510819	T	C	50510916	C	T	5|0	F	F
32666	1	21009752	C	T	2100985021010040	T,G	C,C	2|0,3|0	F,F	F
32666	12	22126579	A	G	22126385	G	A	8|0	F	F
32666	4	76488951	C	T	7.64887e+31	C,C,A,T	A,T,G,A	7|0,3|0,2|0,6|0	M,M,M,M	M
32666	4	137486663	C	T	137486478	G	A	0|2	M	M
32666	5	94175808	T	C	9417564294176090	G,T	A,C	0|20,0|2	M,M	M
32666	7	146256780	A	T	1.46256e+44	T,A,A,A,A	A,G,C,G,T	1|0,1|0,4|0,4|0,4|0	F,F,F,F,F	F
32666	7	168943832	C	G	1.68944e+98	A,G,C,A,C,T,G,G,C,A,G	T,A,A,T,G,A,T,A,T,G,T	0|6,0|6,0|6,0|6,0|8,1|10,1|12,7|0,1|10,1|10,7|0	M,F,F,F,F,F,F,M,F,F,M	F,M
32666	8	7750392	C	T	7.7501e+111	C,C,A,C,G,T,C,T,C,G,C,T,T,C,G,G	T,G,C,A,C,A,T,C,T,A,T,C,C,T,A,T	1|0,3|0,3|0,5|0,5|0,5|0,8|0,8|0,7|0,7|0,0|6,6|0,1|0,1|0,6|0,0|2	F,F,F,F,F,F,F,F,F,F,F,F,F,F,F,F	F
32980	1	146132247	A	G	1.46132e+26	T,A,A	C,T,G	0|6,0|4,0|2	F,F,F	F
32980	15	54127555	C	T	54127521	G	A	1|0	F	F
32980	15	105631836	C	G	105631767	A	C	6|0	F	F
32980	17	75693831	A	C	75694184	C	G	4|0	F	F
32980	18	62548794	C	T	6.25487e+47	T,C,T,G,C,C	C,T,C,A,G,G	0|8,0|10,0|2,0|8,0|4,0|4	F,F,F,F,F,F	F
32980	20	74736487	G	A	7.47362e+23	T,A,G	C,G,A	4|0,0|2,1|0	F,F,F	F
32980	5	155885593	A	C	1.55885e+44	C,T,A,G,A	A,G,T,C,G	1|0,4|0,5|0,1|0,1|0	F,F,F,F,F	F
32980	5	169203239	A	G	169203096	T	C	0|10	F	F
32980	7	55972277	T	C	5.5972e+103	A,C,C,T,G,T,A,C,C,C,A,C,A	G,T,A,C,A,C,T,T,T,T,T,G,G	1|0,1|0,1|6,0|6,0|6,0|6,0|6,0|4,0|8,1|0,1|0,1|0,1|0	M,M,F,F,F,F,F,F,F,M,M,F,F	F,M
32980	7	168946580	G	A	1.68946e+215	G,C,C,A,C,A,C,C,A,G,A,C,G,C,A,C,G,C,C,C,G,C,A,C	A,T,T,G,T,G,A,G,G,A,G,A,C,A,G,G,A,T,G,A,T,T,C,T	1|0,1|0,1|0,1|0,1|0,1|0,1|0,1|0,2|0,2|0,2|0,2|0,4|0,4|0,3|0,3|0,1|0,1|0,1|0,1|0,1|0,1|0,0|6,0|6	M,M,F,F,F,M,M,F,M,M,M,M,M,F,F,F,F,M,M,M,M,F,M,M	F,M
32981	12	798987	C	T	798719799348	G,C	A,T	3|0,0|4	F,F	F
32981	12	73433987	T	G	7343424373434340	C,A	T,T	4|0,3|0	F,F	F
32981	14	13212500	G	A	1321220413212650	A,C	T,T	2|0,0|12	M,M	M
32981	3	16713075	A	T	16713389	G	A	10|0	F	F
32981	3	41948335	G	A	4.1948e+23	C,G,G	T,A,A	3|0,0|2,0|4	F,F,F	F
32981	4	91746994	A	G	9.17466e+47	G,C,A,G,G,G	A,T,G,C,A,A	2|0,4|0,3|0,0|4,0|6,2|0	M,M,M,M,M,M	M
32981	4	91746995	G	T	9.17466e+47	G,C,A,G,G,G	A,T,G,C,A,A	2|0,4|0,3|0,0|4,0|6,2|0	M,M,M,M,M,M	M
32981	5	173013533	T	C	1.73013e+17	G,T	A,A	0|2,0|4	M,M	M
32982	13	11706523	C	T	1170610811706340	C,G	G,A	1|0,5|0	F,M	F,M
32982	17	67704166	A	C	67704255	T	C	7|0	F	F
32982	2	16240229	C	T	1.62403e+31	A,G,C,C	C,C,T,T	3|0,6|0,7|0,7|0	M,M,M,M	M
32982	2	23199379	A	G	2.31992e+23	A,A,T	G,G,C	0|2,6|0,0|2	F,F,F	F
32982	2	27986980	G	A	2.79871e+39	C,T,G,T,C	A,C,T,C,T	6|0,0|14,8|0,11|0,7|0	F,F,F,F,F	F
32982	20	72609235	A	G	72609024	A	G	0|12	F	F
32982	3	64618193	G	A	6461786764618150	T,G	A,A	0|6,0|2	F,F	F
32982	4	169806893	A	T	169807047	A	C	2|0	F	F
32982	8	115901544	C	T	1.15901e+17	A,A	T,C	4|0,2|0	F,F	F
32982	8	130913115	G	C	1.30913e+44	T,C,T,G,A	C,T,A,A,G	0|8,0|12,0|2,0|2,0|4	F,F,F,F,F	F
32982	9	46155164	G	A	46155368	G	T	4|0	F	F
32983	4	18779800	G	A	1.87795e+23	A,C,T	G,T,C	0|2,0|2,1|0	F,F,F	F
32983	4	140183366	G	T	1.40183e+35	A,T,T,C	G,G,G,A	3|0,0|4,5|0,3|0	F,M,F,F	F,M
32983	4	151205661	T	C	151205928	C	T	0|8	F	F
32983	6	68932155	C	T	68932218	T	C	1|0	F	F
32983	8	29769582	A	G	29769242	T	A	3|0	F	F
32983	9	73883484	C	T	73883180	A	G	0|2	F	F
32983	9	76095954	T	A	7.60958e+23	A,T,G	G,G,T	11|0,6|0,0|14	F,F,F	F
33255	12	44865678	G	A	4.48654e+39	G,G,T,G,A	A,C,G,A,G	1|0,4|0,5|0,7|0,2|0	F,F,F,F,F	F
33255	15	73501728	T	C	7.35014e+23	G,A,C	A,C,T	0|6,0|4,0|2	F,F,F	F
33255	2	113050820	T	C	113051109	T	C	1|0	F	F
33255	3	114826858	C	T	114826706	T	C	0|16	F	F
33256	17	61729394	A	C	6172904061729120	G,T	T,C	1|0,1|0	F,F	F
33256	19	54051527	A	T	5405138954051760	C,G	G,C	3|0,4|0	F,F	F
33256	19	54051593	C	T	5.40514e+23	C,G,T	G,C,A	3|0,8|0,3|0	F,F,M	F,M
33256	3	142943961	T	C	1.42944e+17	G,T	A,C	1|0,5|0	M,M	M
33256	4	17024134	A	G	17024037	A	C	3|0	F	F
33256	6	111645044	C	A	1.11645e+62	G,C,C,A,T,T,A	A,T,T,G,C,C,G	1|0,1|0,0|6,0|6,0|8,0|10,0|2	F,F,F,F,F,F,F	F
33256	6	134390357	C	T	1.3439e+26	C,A,G	G,G,A	4|0,0|12,0|8	M,M,M	M
33256	7	47121877	G	A	4.71217e+23	G,A,T	A,G,G	0|16,0|16,0|6	F,F,F	F
33257	10	80547391	G	A	80546970	G	A	2|0	F	F
33257	10	90092518	C	T	9.00923e+31	T,C,A,G	C,T,C,A	0|10,0|8,0|6,0|6	F,F,F,F	F
33257	15	98339617	C	T	9.83392e+63	G,G,A,G,G,A,A,A	C,A,G,C,A,G,G,G	1|0,1|0,1|0,3|0,4|0,4|0,8|0,11|0	F,F,F,F,F,F,F,F	F
33257	2	183731755	G	A	183732066	T	C	1|0	F	F
33257	3	122889470	G	A	1.22889e+17	G,C	A,T	6|0,5|0	F,F	F
33257	7	24949662	G	A	24949739	T	A	1|0	M	M
33257	7	143658535	T	C	1.43659e+26	T,C,G	A,T,T	1|0,1|0,1|0	F,F,F	F
33257	9	38183482	G	A	38183136	T	C	1|0	F	F
33258	1	24271650	C	T	2.42712e+23	C,G,C	G,A,T	1|0,5|0,5|0	M,M,M	M
33258	1	221863923	G	A	2.21864e+71	C,T,C,G,A,C,C,G	G,C,T,T,G,G,T,A	1|0,3|0,2|0,1|0,3|0,10|0,7|0,6|0	M,M,M,M,M,M,M,M	M
33258	10	24560976	C	T	2.45611e+23	G,A,T	T,C,C	5|0,1|0,1|0	M,M,M	M
33258	11	12667750	G	A	1.26674e+31	G,C,T,A	C,A,C,C	0|4,0|2,0|2,0|10	F,F,F,F	F
33258	16	5874692	C	T	5.87431e+27	A,T,A,A	G,C,G,G	3|0,7|0,4|0,0|4	M,M,M,M	M
33258	17	59476707	A	T	59476783	C	T	3|0	F	F
33258	18	22898228	C	T	22897766	C	T	0|2	M	M
33258	18	41830279	G	A	4182997441830130	G,A	A,G	2|0,0|8	M,M	M
33258	2	134272471	C	T	1.34272e+17	G,G	C,T	0|8,7|0	F,F	F
33258	3	151843343	G	A	1.51843e+35	G,G,G,G	T,A,A,C	0|6,0|6,0|6,5|0	M,M,M,M	M
33258	4	4398495	G	A	4.39835e+20	C,G,G	T,A,A	4|0,6|0,5|0	M,M,M	M
33258	4	88586679	G	C	8.85865e+39	C,T,T,A,G	T,A,C,G,A	5|0,1|0,1|0,2|0,2|0	F,F,F,F,F	F
33258	4	109461465	C	A	1.09461e+80	T,A,G,C,G,C,C,G,C	C,G,T,T,T,T,G,A,G	0|8,0|8,0|12,1|0,0|4,0|2,0|2,0|2,0|2	F,F,F,F,F,F,F,F,F	F
33258	4	112432450	G	A	1.12432e+17	C,C	T,T	0|4,0|2	M,M	M
33258	4	129356363	C	T	1.29356e+44	C,C,T,T,T	T,T,C,C,C	1|0,1|0,0|8,0|8,0|10	M,M,M,M,M	M
33258	4	140377644	G	C	1.40377e+35	C,C,T,G	A,T,C,T	0|4,2|0,2|0,0|6	M,M,M,M	M
33258	4	140462941	A	G	1.40463e+80	A,A,A,A,G,G,C,G,T	C,C,C,C,T,T,G,A,G	2|0,2|0,2|0,2|0,0|6,0|6,0|2,1|0,1|0	F,F,F,F,M,M,F,F,M	F,M
33258	5	23870679	G	A	2387038723870910	T,G	A,A	0|4,8|0	M,M	M
33258	5	178749263	C	T	178749619	A	G	1|0	M	M
33258	6	53006180	G	A	5.3006e+31	T,G,G,A	C,A,A,C	0|4,0|6,8|0,7|0	F,F,F,F	F
33258	7	46782860	G	A	4.67826e+23	T,G,G	C,C,A	3|0,0|4,3|0	M,M,M	M
33258	7	88671952	C	T	88672095	G	T	0|4	M	M
33258	9	72650069	C	T	7.26498e+23	C,C,A	T,G,G	0|6,5|0,0|2	M,M,M	M
33258	X	57473806	C	T	57473688	C	A	1|0	M	M
33258	X	57473807	T	G	57473688	C	A	1|0	M	M
33259	13	16448798	G	T	1.64485e+47	T,T,T,A,A,A	C,C,C,T,G,G	0|6,0|6,0|10,0|8,0|4,0|2	F,F,F,F,F,F	F
33259	16	57348942	A	G	5.73489e+31	T,G,C,T	C,A,T,A	5|0,2|0,5|0,8|0	F,F,F,F	F
33259	18	34759641	C	T	3.47593e+23	G,T,C	C,C,G	0|4,0|4,1|0	F,F,F	F
33259	4	63157519	G	A	6315707563157770	A,T	G,C	0|2,0|10	F,F	F
33259	5	105567121	C	T	1.05567e+17	A,T	G,C	3|0,1|0	F,F	F
33259	8	7750392	C	T	7.74993e+139	C,C,A,G,G,C,G,C,C,T,C,T,C,A,G,C,T,C,T,A	A,G,G,A,T,A,A,T,T,A,A,G,T,T,T,G,C,A,C,G	1|0,1|0,5|0,4|0,3|0,5|0,5|0,2|0,1|0,1|0,1|0,0|6,1|8,1|8,0|8,0|8,1|8,1|8,1|8,0|6	M,M,M,M,M,M,M,M,F,M,M,F,F,F,F,F,F,F,F,F	F,M
33259	9	21028397	A	G	2.1028e+55	A,C,G,A,A,T,A	G,G,T,G,C,C,G	3|0,3|0,3|0,3|0,5|0,0|2,0|2	F,F,F,F,F,F,F	F
33259	9	112502150	A	C	1.12502e+26	A,C,C	G,G,G	0|8,0|2,0|2	F,F,F	F
33896	19	54420061	G	C	5.44198e+47	G,C,C,A,C,T	A,T,T,G,T,C	1|0,1|0,4|0,3|0,5|0,5|0	F,F,F,M,F,F	F,M
33896	3	125685952	G	A	1.25686e+35	G,C,T,T	A,T,A,G	4|0,3|0,0|6,0|8	F,F,F,F	F
33896	5	59661016	A	G	59660977	A	T	1|6	M	M
33896	7	12952862	A	T	12952797	G	C	0|4	M	M
33896	8	6370849	C	T	63707526371158	G,C	A,T	8|0,1|0	M,M	M
33896	8	6504485	A	G	6504656	G	A	7|0	F	F
34051	1	222108195	A	G	2.22108e+17	G,G	A,C	0|8,3|0	F,F	F
34051	12	10412905	C	T	1.04125e+23	C,G,C	T,A,T	1|0,7|0,11|0	F,F,F	F
34051	16	32960123	A	G	3.29597e+47	G,G,C,T,G,G	A,T,T,G,A,T	1|0,1|0,1|8,3|0,10|0,10|0	M,M,F,M,M,M	F,M
34051	19	54051527	A	T	5.40513e+39	C,T,C,C,G	T,C,A,G,C	0|6,0|6,0|2,0|6,3|0	M,M,F,M,F	F,M
34051	19	54051593	C	T	5.40515e+23	C,C,G	A,G,C	0|6,0|2,6|0	F,M,F	F,M
34051	2	47458362	C	T	4.74582e+23	C,T,A	T,C,G	0|8,6|0,1|0	F,F,F	F
34051	3	125610420	C	T	1.2561e+44	C,G,A,T,G	T,C,T,C,A	0|6,12|0,3|0,0|10,7|0	F,F,F,F,F	F
34051	8	132224507	C	T	132224423	T	C	3|0	F	F
34051	9	24029555	A	G	2402921824029520	G,G	A,C	0|2,0|6	F,F	F
34052	10	30600964	T	G	3.06006e+55	T,T,C,C,A,A,T	G,C,G,T,G,T,C	1|0,5|0,1|8,1|8,2|0,1|0,1|0	M,M,F,F,M,M,M	F,M
34052	11	14947925	G	A	1494769014948210	C,T	A,A	4|0,1|0	F,F	F
34052	12	22126579	A	G	22126385	G	A	5|0	F	F
34052	17	60079623	C	A	60079418	T	C	3|0	F	F
34052	18	38490843	C	G	3.84906e+23	C,C,G	A,T,A	3|0,0|4,0|10	F,F,F	F
34052	20	42617908	T	C	4261788542618220	C,C	A,T	0|2,0|2	F,F	F
34052	8	74786817	C	T	7478654474786720	C,G	T,A	0|4,0|6	F,F	F
34052	9	43315760	C	T	43316002	C	A	3|0	M	M
34053	12	79320530	G	A	7932031279320440	G,A	A,C	5|0,9|0	F,F	F
34053	13	80363356	T	C	8036325980363470	A,A	G,G	8|0,14|0	F,F	F
34053	16	30495802	G	A	3.04955e+119	C,G,G,T,C,G,C,A,C,G,G,A,T,T,A	T,A,A,C,T,A,T,G,T,A,A,G,C,C,G	0|2,5|0,5|0,7|0,3|0,0|6,3|0,0|6,8|0,5|0,8|0,0|10,6|0,6|0,2|0	M,M,M,M,M,F,M,M,F,F,M,F,M,M,M	F,M
34053	6	85156434	A	T	8515642785156450	G,G	A,A	0|6,4|0	F,F	F
34053	6	113272131	G	A	113272252	C	T	5|0	F	F
34053	7	168912500	A	G	1.68912e+44	C,G,T,G,G	T,C,C,C,A	4|0,1|0,3|0,9|0,8|0	M,M,M,M,M	M
34053	7	168912505	T	C	1.68912e+44	C,G,T,G,G	T,C,C,C,A	4|0,1|0,3|0,9|0,8|0	M,M,M,M,M	M
34053	8	7750392	C	T	7.7501e+97	C,C,G,T,T,G,T,C,G,T,T,C,C,G	T,G,C,A,C,C,*,G,A,C,C,T,G,A	6|0,6|0,10|0,11|0,16|0,7|0,3|0,8|0,8|0,5|0,2|0,2|0,5|0,10|0	F,F,F,F,F,F,F,F,F,F,F,F,M,F	F,M
34692	12	22126579	A	G	22126385	G	A	10|0	F	F
34692	12	102045480	T	G	1.02045e+35	G,T,C,A	A,G,A,C	3|0,5|0,3|0,3|0	M,M,M,M	M
34692	18	43562717	C	A	4.35624e+23	T,C,G	C,T,A	3|0,9|0,2|0	F,F,F	F
34692	20	25023625	T	A	2.50233e+23	G,C,T	T,T,C	0|4,0|6,0|6	F,F,F	F
34692	6	86700051	A	G	86699798	C	T	2|0	F	F
34692	7	103378769	G	T	1.03379e+26	C,G,G	T,C,A	2|0,2|0,1|0	F,F,F	F
34749	1	21363388	C	T	2.1363e+23	A,T,T	G,G,C	0|4,0|2,0|10	M,M,M	M
34749	11	31278109	G	C	3127778531278290	T,T	C,C	0|4,5|0	F,F	F
34749	12	35243095	T	C	35243349	C	T	0|2	F	F
34749	13	101018505	G	A	1.01018e+44	T,G,A,A,G	G,A,G,G,T	2|0,0|2,0|10,1|12,2|0	F,F,F,F,F	F
34749	17	46548570	C	T	46548552	G	C	1|0	F	F
34749	20	75161025	T	C	7.51607e+39	G,C,C,G,C	A,T,G,A,A	5|0,0|6,2|0,6|0,8|0	F,F,F,F,F	F
34749	4	62576669	T	G	6257690662576970	G,G	A,T	3|0,2|0	M,M	M
34749	4	139985183	G	A	1.39985e+152	G,T,C,A,G,A,G,C,C,C,G,G,C,C,T,C,A	A,A,T,G,T,G,A,A,T,A,A,A,G,T,A,G,G	1|0,4|0,1|0,1|0,1|0,1|0,2|0,0|6,6|0,5|0,4|0,1|0,1|0,1|0,1|0,1|0,1|0	M,M,M,M,M,M,M,M,M,M,M,M,M,M,M,M,M	M
34749	4	140405057	C	T	1.40405e+26	T,C,G	C,G,A	0|2,0|4,1|0	F,F,M	F,M
34749	4	140462941	A	G	1.40463e+89	G,A,C,G,A,A,G,G,G,G	A,G,T,A,C,G,A,C,A,C	1|0,1|0,1|0,2|0,3|0,1|6,4|0,6|0,1|0,1|0	F,F,F,M,F,F,F,F,M,M	F,M
34749	5	111388855	A	T	111389179	G	A	0|4	F	F
34749	6	35509104	G	A	3.55089e+55	A,T,G,A,T,A,C	G,C,A,G,C,C,A	7|0,6|0,5|0,4|0,2|0,1|0,2|0	F,F,F,F,F,F,F	F
34749	6	35509113	G	C	3.55089e+55	A,T,G,A,T,A,C	G,C,A,G,C,C,A	7|0,6|0,5|0,5|0,3|0,2|0,2|0	F,F,F,F,F,F,F	F
34749	7	251196	G	A	2.50941e+41	G,A,T,T,G,T,C	T,T,C,C,A,C,T	3|0,1|0,1|6,6|0,5|0,4|0,3|0	M,F,F,M,M,M,M	F,M
34749	7	58677511	C	T	5867722658677650	T,C	C,T	4|0,5|0	F,F	F
34749	9	56823045	T	A	5.68227e+39	G,G,G,T,A	A,A,A,C,G	1|0,7|0,1|0,5|0,0|4	F,F,F,F,F	F
34749	X	42608468	C	G	4260855142608580	G,C	A,T	4|0,8|0	F,F	F
34760	1	46116653	G	C	4.61164e+23	G,G,G	A,C,T	6|0,7|0,0|8	M,M,M	M
34760	11	109383363	C	T	1.09383e+17	T,A	C,C	7|0,0|8	F,F	F
34760	14	114007664	A	C	114007598	T	C	0|4	F	F
34760	17	11854165	A	C	1.18539e+47	C,G,G,A,G,G	A,A,A,C,A,T	0|2,6|0,5|0,0|2,0|2,1|0	F,F,F,F,F,F	F
34760	18	38595166	G	A	38595013	A	G	0|6	M	M
34760	7	61438671	G	A	6.14383e+31	T,G,C,T	C,A,A,G	0|8,0|2,8|0,9|0	F,F,F,F	F
34760	8	64544152	G	T	6.45438e+39	C,T,T,A,G	T,C,G,C,A	0|6,0|10,1|6,0|4,0|10	F,F,F,F,F	F
34760	9	19986145	C	T	19985791	G	C	0|4	M	M
34761	1	38019695	C	T	38019313	T	C	1|0	F	F
34761	1	53226845	A	C	5.32268e+23	G,A,T	C,C,G	0|10,0|10,0|4	F,F,F	F
34761	15	55586744	G	A	55587049	C	T	0|6	F	F
34761	5	181706471	C	T	181706777	A	G	1|0	F	F
34761	6	146089704	A	T	1.46089e+53	T,A,A,T,G,A	G,T,C,C,A,G	0|2,1|0,6|0,0|8,10|0,10|0	F,F,F,F,F,F	F
34762	10	42799334	A	G	4.27994e+71	A,C,T,C,G,C,G,G,G	G,T,C,G,C,T,A,T,A	5|0,10|0,5|0,7|0,4|0,2|0,0|2,2|0,1|0	M,M,M,M,M,M,M,M,M	M
34762	11	24483381	G	A	24483591	T	C	7|0	F	F
34762	12	77763567	T	G	77763635	G	C	2|0	F	F
34762	17	84057504	A	G	84057229	G	T	0|2	F	F
34762	18	23643672	A	G	23643499	C	T	0|14	F	F
34762	4	63158470	C	T	63158453	G	T	2|0	F	F
34762	5	96020677	A	C	9.60206e+31	G,A,T,A	A,G,C,C	5|0,4|0,4|0,4|0	F,F,F,F	F
34762	9	3619941	C	T	3619992	T	G	0|2	F	F
34763	15	80082884	T	A	8008250880083100	G,C	A,T	0|2,0|2	F,F	F
34763	8	17450	C	G	171761759617787	C,C,C	T,G,T	4|0,8|0,1|0	M,M,M	M
34763	X	1086323	T	A	1086480	C	G	7|0	M	M
34764	1	65118552	G	A	6.51182e+47	G,C,T,T,C,G	A,T,C,C,T,A	0|4,0|4,1|0,0|2,2|0,4|0	M,M,M,M,M,M	M
34764	1	112361314	G	A	1.12361e+35	A,T,A,T	C,G,C,C	0|2,5|0,6|0,0|4	M,M,M,M	M
34764	1	117615090	C	T	1.17615e+53	A,T,G,T,G,C	G,G,C,C,A,T	0|2,0|8,0|10,0|10,0|10,0|4	M,M,M,M,M,M	M
34764	10	45532061	G	A	45532303	T	C	3|0	F	F
34764	12	31947415	C	T	31947793	A	C	1|0	M	M
34764	13	86509263	C	T	8650917186509580	G,A	A,G	4|0,3|0	M,M	M
34764	13	89466768	G	A	8946653489466540	C,C	T,T	0|14,11|0	M,M	M
34764	13	101926090	G	A	101925993	G	T	3|0	M	M
34764	14	1372544	G	A	1.37213e+34	G,T,T,T,T	A,G,G,C,C	1|0,4|0,1|0,5|0,4|0	M,M,M,M,M	M
34764	14	100466927	G	A	1.00467e+35	G,C,C,T	C,G,T,C	8|0,0|6,0|6,3|0	M,M,M,M	M
34764	16	77451772	C	T	7745179877452000	G,G	A,T	1|0,8|0	M,M	M
34764	17	3649699	G	A	3.64957e+27	A,C,A,C	G,T,G,T	0|8,0|6,0|2,0|4	M,M,M,M	M
34764	18	15838216	A	C	1.5838e+23	G,G,C	A,A,T	6|0,0|4,4|0	M,M,M	M
34764	19	28863783	C	T	2886355728863840	G,T	A,C	5|0,3|0	M,M	M
34764	2	42171729	G	A	42171626	G	A	0|8	F	F
34764	2	175779940	G	A	1.7578e+17	C,G	T,A	3|0,2|0	F,F	F
34764	2	179191364	G	A	1.79191e+17	G,A	A,T	0|4,3|0	M,M	M
34764	2	179260074	C	T	1.7926e+44	T,A,C,A,A	C,G,A,G,G	3|0,7|0,3|0,8|0,1|0	M,M,M,M,M	M
34764	20	2000808	G	A	2.0004e+20	C,C,T	T,G,C	0|2,1|0,0|4	M,M,M	M
34764	3	34999957	C	T	3.49997e+39	A,G,T,T,G	G,A,C,G,A	0|6,0|6,0|12,0|10,1|0	M,M,M,M,M	M
34764	3	36657614	G	A	3665778836657900	G,C	A,T	0|8,7|0	M,M	M
34764	3	115467378	C	T	1.15467e+44	G,C,G,C,T	C,G,A,T,C	8|0,4|0,9|0,7|0,0|6	M,M,M,M,M	M
34764	4	15515966	C	T	15516226	G	A	0|6	M	M
34764	4	120176308	G	A	1.20176e+26	A,T,T	T,C,C	2|0,3|0,2|0	M,M,M	M
34764	4	140377644	G	C	1.40377e+17	C,T	A,C	0|4,1|0	M,M	M
34764	4	140462941	A	G	1.40463e+53	G,A,A,G,C,G	A,C,C,T,G,A	1|0,7|0,7|0,0|8,1|10,0|2	F,F,F,M,F,F	F,M
34764	4	140463098	C	T	1.40463e+44	G,C,G,A,A	T,G,A,T,G	0|2,3|0,0|2,1|0,0|2	M,M,M,M,F	F,M
34764	5	65917215	G	A	65917497	A	T	2|0	M	M
34764	5	125296728	C	T	125297042	G	A	0|2	F	F
34764	6	7421712	G	A	7422058	A	G	2|0	M	M
34764	6	8830843	C	T	8.83047e+62	T,C,C,A,T,G,C,A,A	C,T,T,C,C,A,T,C,G	2|0,3|0,3|0,3|0,4|0,4|0,5|0,8|0,2|0	M,M,M,M,M,M,M,M,M	M
34764	7	29705295	A	T	2.97049e+39	A,A,C,G,C	G,C,T,A,A	2|0,0|12,0|2,5|0,6|0	F,F,F,F,F	F
34764	7	64003695	C	T	6400342464004020	G,T	A,G	0|4,0|4	M,M	M
34764	7	156839840	G	A	1.5684e+17	T,A	C,G	6|0,1|0	M,M	M
34764	8	135946640	G	A	1.35946e+62	C,C,A,G,A,T,G	G,T,G,C,G,C,A	2|0,2|0,8|0,10|0,9|0,9|0,3|0	M,M,M,M,M,M,M	M
35286	1	220991772	G	A	2.20992e+26	C,C,G	T,G,A	5|0,0|2,0|2	M,M,M	M
35286	1	221264746	C	T	2.21265e+35	G,G,T,G	A,C,C,A	6|0,6|0,0|4,1|0	M,M,M,M	M
35286	1	221912645	C	T	2.21912e+35	G,A,G,A	A,G,A,G	9|0,7|0,6|0,2|0	M,M,M,M	M
35286	10	51439883	C	T	5.14395e+39	G,C,C,C,T	A,T,T,T,A	1|6,0|4,0|4,0|6,3|0	M,M,M,M,M	M
35286	11	25309372	C	T	2.5309e+23	C,T,A	T,C,C	0|4,0|2,1|0	M,M,M	M
35286	12	26474977	G	A	2647491326475230	A,T	T,C	0|6,5|0	M,M	M
35286	12	34425774	C	T	3.44255e+23	C,A,C	T,G,A	0|6,0|4,0|4	M,M,M	M
35286	12	96064899	C	T	9.60645e+55	A,G,G,A,A,G,T	G,A,T,G,G,A,C	1|0,0|2,0|2,0|2,0|2,0|6,0|6	M,M,M,M,M,M,M	M
35286	12	125937553	G	A	1.25937e+35	C,C,A,G	T,T,G,A	0|4,0|6,0|8,6|0	M,M,M,M	M
35286	12	127887277	G	T	1.27887e+62	T,C,G,T,G,C,C	C,T,A,C,A,A,T	1|8,7|0,0|6,6|0,1|0,1|0,1|0	F,F,F,F,F,F,F	F
35286	13	51796279	G	A	5179648151796530	T,A	C,C	9|0,1|8	M,M	M
35286	15	106154015	G	A	1.06154e+35	C,A,G,A	T,G,A,C	0|2,0|2,0|2,0|2	M,M,M,M	M
35286	17	58191255	G	A	58191151	C	T	2|0	M	M
35286	2	42601533	C	T	4260154842601720	G,T	A,C	2|0,6|0	M,M	M
35286	2	124917212	G	A	124917443	T	G	1|0	F	F
35286	2	181476141	G	A	181475901	C	T	1|6	M	M
35286	20	58255241	C	T	5.82549e+31	G,T,C,A	A,C,T,G	1|0,0|6,0|6,0|6	M,M,M,M	M
35286	20	62823486	G	A	6282318162823180	A,G	G,A	7|0,7|0	M,M	M
35286	3	69550729	G	A	69550820	T	C	0|2	M	M
35286	3	70249890	G	A	7.02495e+23	G,G,C	A,T,T	3|0,0|4,0|2	M,M,M	M
35286	3	116534046	C	T	116533710	G	A	1|0	M	M
35286	4	125069730	C	T	125069322	G	A	0|2	M	M
35286	4	140469304	G	T	1.40469e+116	A,T,G,G,G,T,C,G,A,G,C,G,A	T,C,A,A,T,C,T,C,G,A,A,C,C	1|0,9|0,9|0,9|0,7|0,7|0,7|0,1|0,3|0,0|2,1|0,1|0,1|0	M,M,M,M,M,M,M,M,M,F,M,M,M	F,M
35286	5	983519	C	T	983540983962	G,A	A,G	1|0,1|0	F,F	F
35286	5	98755558	G	A	9.87552e+79	C,G,A,G,A,C,A,G,T,T	T,A,G,A,G,G,G,C,C,C	0|2,0|4,0|6,7|0,0|10,0|2,0|2,0|2,0|2,2|0	M,M,M,M,M,M,M,M,M,M	M
35286	6	120663733	G	A	1.20663e+53	C,C,T,G,C,A	T,T,C,A,T,G	0|2,0|4,0|8,0|8,0|4,0|2	M,M,M,M,M,M	M
35286	7	72618638	G	A	7.26183e+151	C,C,G,T,G,T,A,T,A,G,T,T,A,C,T,T,T,T,T	A,T,A,A,A,C,G,C,G,A,A,C,G,T,C,C,A,C,C	0|4,0|4,0|6,0|6,0|4,0|6,0|6,0|2,0|2,0|2,0|2,0|2,0|2,0|4,0|6,0|6,0|6,0|4,0|4	M,M,M,M,M,M,M,M,M,M,M,M,M,M,M,M,M,M,M	M
35286	9	132861629	G	A	1.32862e+26	C,C,G	T,T,T	1|0,9|0,0|16	M,M,M	M
35413	1	119850349	A	C	1.1985e+35	C,C,C,T	G,G,T,C	1|0,0|4,0|10,0|4	F,F,F,F	F
35413	11	45764661	A	C	4.57643e+39	T,C,C,T,A	A,T,G,A,G	0|4,0|8,0|2,0|2,0|2	F,F,F,F,F	F
35413	14	23550005	T	A	2.35499e+23	G,G,T	A,A,G	1|0,1|0,2|0	M,M,M	M
35413	14	28273067	C	G	2.82732e+31	G,G,G,T	C,T,T,C	12|0,0|16,13|0,3|0	F,F,F,F	F
35413	18	62306815	T	G	62306428	C	T	0|2	F	F
35413	20	65558603	C	T	6.55583e+23	C,T,C	T,G,T	0|6,0|2,4|0	F,F,F	F
35413	3	172423548	C	T	1.72423e+53	A,T,C,T,T,C	T,C,T,C,A,G	2|0,2|0,4|0,0|6,3|0,3|0	F,F,F,F,F,F	F
35413	8	70367224	C	T	70367409	A	G	0|2	F	F
35719	1	30017911	A	T	3.00176e+31	G,A,C,A	T,G,T,T	2|0,6|0,6|0,1|0	F,F,F,F	F
35719	1	102144923	A	C	1.02145e+26	G,A,G	A,G,A	0|10,0|2,2|0	F,F,F	F
35719	19	5038609	G	A	5038227	T	C	1|0	F	F
35719	3	61929670	C	T	61929427	G	T	4|0	F	F
35719	3	65622982	C	T	6562288265623210	C,A	T,G	0|4,7|0	F,F	F
35719	3	84342424	C	A	8.4342e+31	G,C,C,C	A,A,T,T	1|0,1|0,1|0,10|0	F,F,F,F	F
35719	4	140183366	G	T	1.40183e+161	G,G,T,C,C,T,C,A,G,C,T,C,A,T,A,C,G,C	A,A,A,T,T,G,T,G,A,T,C,G,G,G,C,A,A,G	1|0,1|0,2|0,2|0,3|0,2|0,4|0,2|0,2|0,2|0,1|0,1|0,1|0,7|0,3|0,2|0,0|2,1|0	F,F,F,F,F,F,F,F,F,F,F,F,F,F,F,F,M,F	F,M
35719	4	163504718	A	G	163505071	C	T	0|6	F	F
35719	7	37687769	C	A	3768777037687920	C,G	A,A	1|0,0|6	M,F	F,M
35719	8	16500893	T	C	16501199	G	A	7|0	M	M
35721	1	150497035	C	T	1.50497e+17	T,C	G,A	0|6,0|6	F,F	F
35721	12	100752110	A	C	100751820	G	A	0|6	F	F
35721	20	1470631	C	T	1.47025e+69	A,G,A,A,C,C,T,C,C,G	G,A,C,T,T,T,C,T,T,A	0|4,0|2,0|2,0|2,0|4,0|12,0|12,0|4,5|0,0|2	F,F,F,F,F,F,F,F,F,F	F
35721	5	145967296	T	C	145967544	T	C	0|6	F	F
35721	6	101733132	G	A	1.01733e+89	C,C,T,C,G,C,C,C,A,T	A,T,C,T,A,T,T,A,G,C	3|0,2|0,2|0,2|0,2|0,2|0,2|0,2|0,3|0,6|0	F,F,F,F,F,F,F,F,F,F	F
36319	1	123084651	C	G	1.23085e+17	G,G	A,T	4|0,3|0	F,F	F
36319	11	27377467	C	T	2737753427377660	C,C	T,T	2|0,3|0	M,M	M
36319	11	34617161	C	T	3.46169e+31	T,G,A,T	A,A,G,C	2|0,0|8,0|2,0|2	M,M,M,M	M
36319	12	105268927	G	A	1.05269e+35	G,G,C,C	A,A,A,T	1|0,3|0,7|0,0|2	M,M,M,M	M
36319	13	54018016	C	T	54017717	G	A	3|0	M	M
36319	13	96362699	C	T	96362468	G	C	0|10	M	M
36319	14	106410826	G	A	1.0641e+17	C,A	T,T	1|0,6|0	M,M	M
36319	15	53737396	G	A	53737173	G	A	0|6	M	M
36319	17	65216627	G	A	6521655565216810	T,T	C,C	0|2,0|2	M,M	M
36319	17	83873120	G	A	8.3873e+31	T,G,C,C	C,T,T,T	0|10,0|4,0|4,0|4	M,M,M,M	M
36319	17	93175118	C	T	9.31749e+47	T,C,C,A,C,C	C,T,A,G,T,T	0|6,0|6,3|0,1|0,0|2,0|2	M,M,M,M,M,M	M
36319	2	13311010	G	A	1331075213311060	C,A	G,G	3|0,2|0	M,M	M
36319	3	18180566	C	T	18180619	C	T	0|2	F	F
36319	4	135609305	C	T	1.35609e+17	A,G	G,A	4|0,5|0	M,M	M
36319	5	88988922	C	T	8898877088988800	A,A	C,G	6|0,0|8	M,M	M
36319	5	150632310	C	T	150632127	C	T	0|12	M	M
36319	6	4728260	G	A	4728646	T	C	0|2	M	M
36319	7	142272279	C	T	142272194	A	G	3|0	M	M
36319	8	102010108	C	T	1.0201e+17	T,A	C,C	4|0,2|0	M,M	M
36319	9	12414044	C	T	1.24143e+23	C,C,A	T,T,C	6|0,0|6,0|2	M,M,M	M
37026	2	16671391	G	A	1667132316671670	C,C	T,T	0|4,0|12	F,F	F
37026	3	181802963	C	T	1.81803e+17	A,G	G,A	0|4,2|0	F,F	F
37026	6	168975310	G	A	168975100	G	A	0|2	F	F
37026	7	168947112	G	C	1.68947e+143	C,A,G,T,C,T,C,G,G,A,G,G,T,T,G,A	A,G,A,C,A,A,T,C,T,G,C,C,G,C,T,C	2|0,3|0,7|0,4|0,0|2,0|2,5|0,3|0,3|0,0|6,1|8,7|0,3|0,5|0,1|0,1|0	M,M,M,M,F,F,M,F,F,M,M,M,M,M,M,F	F,M
37026	8	17450	C	G	171761759617787	C,C,C	T,G,T	5|0,8|0,8|0	M,M,M	M
37204	1	56370606	T	C	5.63708e+23	T,T,G	C,A,T	4|0,0|4,8|0	F,F,F	F
37204	1	176233334	T	C	1.76233e+17	C,A	T,C	1|0,2|0	F,F	F
37204	11	80297653	C	A	80297845	T	C	0|10	F	F
37204	15	21527851	A	G	21527925	C	T	0|2	F	F
37204	15	77660880	T	C	7766095577661120	T,C	C,T	0|2,0|6	F,F	F
37204	2	79374022	C	T	79374513	A	T	1|0	F	F
37204	2	131767326	G	A	131767539	C	T	0|12	F	F
37204	5	132107612	C	G	1.32108e+17	A,A	G,T	2|0,5|0	F,F	F
37204	8	7779194	A	G	7.77891e+34	C,C,C,T,A	A,G,T,G,C	0|2,1|6,1|0,1|0,1|0	M,M,F,F,F	F,M
37204	8	7845637	G	A	7.84528e+69	T,G,G,G,T,C,A,T,T,A	G,A,A,A,C,T,G,C,G,T	1|0,3|0,6|0,6|0,7|0,5|0,2|0,1|0,1|0,4|0	M,M,M,M,M,M,M,M,M,M	M
37204	8	102048810	G	A	1.02049e+35	C,T,T,C	T,C,C,T	4|0,5|0,6|0,8|0	F,F,F,F	F
37204	9	720126	A	G	7.20208e+17	G,C,G	A,T,A	1|0,2|0,2|0	M,M,M	M

## Sheet: Supplementary Table 3
Gene	Database
A1CF	CGC_genes
ABCA4	Other_CancerGene
ABCD1	Other_CancerGene
ABCF1	DDD_genes
ABI1	CGC_genes,Other_CancerGene
ABL1	CGC_genes,DDD_genes,Kinase
ABL2	CGC_genes,Kinase
ACE	DDD_genes
ACKR3	CGC_genes,Other_CancerGene
ACOX1	DDD_genes
ACSL3	CGC_genes,Other_CancerGene
ACSL6	CGC_genes,Other_CancerGene
ACTL6A	DDD_genes
ACTL6B	DDD_genes
ACVR1	CGC_genes
ACVR1B	CGC_genes,Tarpey_drivers
ACVR2A	CGC_genes,Tarpey_drivers
ADAMTS12	Tarpey_drivers
ADCY5	DDD_genes
ADGRG1	DDD_genes
ADNP	DDD_genes
AEN	Other
AFDN	CGC_genes
AFF1	CGC_genes,Other_CancerGene
AFF3	CGC_genes,DDD_genes,Other_CancerGene
AFF4	CGC_genes,DDD_genes,Other_CancerGene
AGO1	DDD_genes
AHDC1	DDD_genes
AKAP9	CGC_genes,Other_CancerGene
AKT1	CGC_genes,Other_CancerGene,Tarpey_drivers
AKT2	CGC_genes,Other_CancerGene,Tarpey_drivers
AKT3	CGC_genes,DDD_genes
ALDH2	CGC_genes,Other_CancerGene
ALG13	DDD_genes
ALK	Autosomal_Dominant,CGC_genes,Kinase
ALKBH1	BER
ALKBH2	DR_core,DR
ALKBH3	DR_core,DR
AMER1	CGC_genes,Other_CancerGene
ANK1	CGC_genes
ANKRD11	DDD_genes
ANO5	DDD_genes
ANPEP	DDD_genes
ANXA6	DDD_genes
AP1G1	DDD_genes
AP2S1	DDD_genes
APC	ACMG,Autosomal_Dominant,CGC_genes,Tarpey_drivers,Tumor_Suppressor
APEX1	BER,BER_core
APEX2	BER,BER_core
APITD1	FA
APLF	BER
APOBEC3B	CGC_genes
APTX	BER
AR	CGC_genes
ARAF	CGC_genes
ARF1	DDD_genes
ARHGAP26	CGC_genes,Other_CancerGene
ARHGAP35	CGC_genes,Tarpey_drivers
ARHGAP5	CGC_genes
ARHGEF10	CGC_genes
ARHGEF10L	CGC_genes
ARHGEF12	CGC_genes,Tumor_Suppressor
ARHGEF9	DDD_genes
ARID1A	CGC_genes,Tarpey_drivers,Tumor_Suppressor
ARID1B	CGC_genes,DDD_genes,Tarpey_drivers
ARID2	CGC_genes,Tarpey_drivers,Tumor_Suppressor
ARID5B	Other_CancerGene,Tarpey_drivers
ARNT	CGC_genes,Other_CancerGene
ARPC4	DDD_genes
ARPP21	DDD_genes
ARRB2	DDD_genes
ASCC3	DR
ASIC3	DDD_genes
ASPSCR1	CGC_genes,Other_CancerGene
ASXL1	CGC_genes,DDD_genes,Tarpey_drivers,Tumor_Suppressor
ASXL2	CGC_genes
ASXL3	DDD_genes
ATF1	CGC_genes
ATIC	CGC_genes,Other_CancerGene
ATM	Autosomal_Recessive,CGC_genes,Others_core,Kinase,Other,Tarpey_drivers,Tumor_Suppressor
ATN1	DDD_genes
ATP13A1	DDD_genes
ATP1A1	CGC_genes
ATP1A3	DDD_genes
ATP2B3	CGC_genes
ATP5F1B	DDD_genes
ATP6V0A1	DDD_genes
ATP6V1A	DDD_genes
ATP7B	DDD_genes
ATR	CGC_genes,Others_core,Other,Tarpey_drivers
ATRIP	Others_core,Other
ATRX	CGC_genes,Other_CancerGene,Other,Tarpey_drivers
AUTS2	DDD_genes
AXIN1	CGC_genes,Tarpey_drivers
AXIN2	CGC_genes,Tarpey_drivers,Tumor_Suppressor
B2M	CGC_genes
B4GALT3	Tarpey_drivers
BABAM1	Other
BAG3	DDD_genes
BAP1	Autosomal_Dominant,CGC_genes,Tarpey_drivers,Tumor_Suppressor
BARD1	CGC_genes,HR_core,FA,HR,Tumor_Suppressor
BAX	CGC_genes
BAZ1A	CGC_genes
BCAS2	Other
BCL10	CGC_genes,Tumor_Suppressor
BCL11A	CGC_genes,DDD_genes,Other_CancerGene
BCL11B	CGC_genes,DDD_genes,Other_CancerGene
BCL2	CGC_genes,Other_CancerGene
BCL2L12	CGC_genes
BCL3	CGC_genes,Other_CancerGene
BCL6	CGC_genes,Other_CancerGene
BCL7A	CGC_genes,Other_CancerGene
BCL9	CGC_genes,Other_CancerGene
BCL9L	CGC_genes,Tarpey_drivers
BCLAF1	CGC_genes
BCOR	CGC_genes,Other_CancerGene,Tarpey_drivers
BCORL1	CGC_genes
BCR	CGC_genes,Tumor_Suppressor
BFSP1	DDD_genes
BIRC3	CGC_genes,Other_CancerGene
BIRC6	CGC_genes
BLM	Autosomal_Recessive,CGC_genes,HR_core,FA,HR,Tumor_Suppressor
BMP4	Other_CancerGene
BMP5	CGC_genes
BMPR1A	Autosomal_Dominant,CGC_genes
BMPR2	DDD_genes
BRAF	Autosomal_Dominant,CGC_genes,DDD_genes,Kinase,Tarpey_drivers
BRCA1	ACMG,Autosomal_Dominant,CGC_genes,HR_core,FA,HR,Tarpey_drivers,Tumor_Suppressor
BRCA2	ACMG,Autosomal_Dominant,CGC_genes,HR_core,FA,HR,Tarpey_drivers,Tumor_Suppressor
BRCC3	Other
BRD3	CGC_genes,Other_CancerGene
BRD4	CGC_genes,Other_CancerGene
BRE	FA
BRIP1	Autosomal_Recessive,CGC_genes,HR_core,FA,HR
BSCL2	DDD_genes
BTG1	CGC_genes,Other_CancerGene
BTG2	CGC_genes
BTK	CGC_genes,Kinase
BTRC	DDD_genes
BUB1B	CGC_genes,Kinase,Tarpey_drivers,Tumor_Suppressor
C12orf10	DDD_genes
C15orf65	CGC_genes
C2orf44	Other_CancerGene
CACNA1A	DDD_genes
CACNA1C	DDD_genes
CACNA1D	CGC_genes
CACNA1E	DDD_genes
CACNA1G	DDD_genes
CADM1	DDD_genes
CALR	CGC_genes
CAMK2B	DDD_genes
CAMTA1	CGC_genes,Tumor_Suppressor
CAMTA2	DDD_genes
CANT1	CGC_genes,Other_CancerGene
CARD11	CGC_genes,Other_CancerGene
CARS	CGC_genes,Other_CancerGene
CASC5	Other_CancerGene
CASK	DDD_genes
CASP10	Other_CancerGene
CASP3	CGC_genes
CASP8	CGC_genes,Tarpey_drivers,Tumor_Suppressor
CASP9	CGC_genes
CBFA2T3	CGC_genes,Tumor_Suppressor
CBFB	CGC_genes,Other_CancerGene,Tarpey_drivers
CBL	Autosomal_Dominant,CGC_genes,DDD_genes
CBLB	CGC_genes,Other_CancerGene,Tarpey_drivers
CBLC	CGC_genes,Other_CancerGene
CBX3	DDD_genes
CCDC6	CGC_genes,Other_CancerGene
CCNB1IP1	CGC_genes,Other_CancerGene
CCNC	CGC_genes
CCND1	CGC_genes,Other_CancerGene,Tarpey_drivers
CCND2	CGC_genes,DDD_genes,Other_CancerGene
CCND3	CGC_genes,Other_CancerGene
CCNE1	CGC_genes,Other_CancerGene
CCNH	NER
CCR4	CGC_genes
CCR7	CGC_genes
CD209	CGC_genes
CD274	CGC_genes,Other_CancerGene
CD28	CGC_genes
CD74	CGC_genes,Other_CancerGene
CD79A	CGC_genes,Other_CancerGene
CD79B	CGC_genes,Other_CancerGene
CDC25A	Other_CancerGene,Other
CDC25B	Other
CDC25C	Other
CDC5L	Other
CDC73	Autosomal_Dominant,CGC_genes,Tumor_Suppressor
CDCA7L	DDD_genes
CDH1	Autosomal_Dominant,CGC_genes,Tarpey_drivers,Tumor_Suppressor
CDH10	CGC_genes
CDH11	CGC_genes,Tumor_Suppressor
CDH17	CGC_genes
CDK12	CGC_genes,Kinase,Other_CancerGene
CDK13	DDD_genes
CDK4	Autosomal_Dominant,CGC_genes,Kinase
CDK6	CGC_genes,Kinase,Other_CancerGene
CDK7	NER
CDK8	DDD_genes
CDKL5	DDD_genes
CDKN1A	CGC_genes,Tumor_Suppressor
CDKN1B	CGC_genes,Tarpey_drivers
CDKN1C	Autosomal_Dominant,Tumor_Suppressor
CDKN2A	Autosomal_Dominant,CGC_genes,Tarpey_drivers,Tumor_Suppressor
CDKN2C	CGC_genes,Tumor_Suppressor
CDX2	CGC_genes,Other_CancerGene
CEBPA	Autosomal_Dominant,CGC_genes,Tumor_Suppressor
CEP131	DDD_genes
CEP89	CGC_genes
CETN2	NER
CFAP100	DDD_genes
CHAF1A	Other
CHAMP1	DDD_genes
CHCHD7	CGC_genes,Other_CancerGene
CHD2	CGC_genes,DDD_genes
CHD3	DDD_genes
CHD4	CGC_genes
CHEK1	Others_core,Other
CHEK2	CGC_genes,Others_core,Kinase,Other,Tarpey_drivers,Tumor_Suppressor
CHIC2	CGC_genes,Other_CancerGene
CHN1	Other_CancerGene
CHST11	CGC_genes
CIC	CGC_genes,Other_CancerGene,Tarpey_drivers
CIITA	CGC_genes,Other_CancerGene
CLCN4	DDD_genes
CLCN7	DDD_genes
CLIP1	CGC_genes
CLK2	Other
CLP1	CGC_genes,Other_CancerGene
CLTC	CGC_genes,DDD_genes,Other_CancerGene
CLTCL1	CGC_genes,Other_CancerGene
CNBD1	CGC_genes
CNBP	CGC_genes,Other_CancerGene
CNOT3	CGC_genes,DDD_genes,Tarpey_drivers
CNTNAP2	CGC_genes
CNTRL	CGC_genes,Other_CancerGene
COG4	DDD_genes
COL1A1	CGC_genes,Other_CancerGene
COL24A1	DDD_genes
COL2A1	CGC_genes,DDD_genes
COL3A1	CGC_genes
COL4A3BP	DDD_genes
COL6A1	DDD_genes
COLCA2	Other_CancerGene
COX6C	CGC_genes,Other_CancerGene
CPEB3	CGC_genes
CPO	DDD_genes
CREB1	CGC_genes,Other_CancerGene
CREB3L1	CGC_genes,Other_CancerGene
CREB3L2	CGC_genes,Other_CancerGene
CREBBP	CGC_genes,DDD_genes,Tarpey_drivers,Tumor_Suppressor
CRIPAK	Tarpey_drivers
CRISP2	DDD_genes
CRLF2	CGC_genes,Other_CancerGene
CRNKL1	CGC_genes
CRTC1	CGC_genes,Other_CancerGene
CRTC3	CGC_genes,Other_CancerGene
CSF1R	CGC_genes
CSF3R	CGC_genes
CSMD3	CGC_genes
CSNK2A1	DDD_genes
CTBP1	DDD_genes
CTCF	CGC_genes,DDD_genes,Tarpey_drivers
CTNNA1	CGC_genes
CTNNA2	CGC_genes,DDD_genes
CTNNB1	CGC_genes,DDD_genes,Other_CancerGene,Tarpey_drivers
CTNND1	CGC_genes,DDD_genes
CTNND2	CGC_genes
CUL3	CGC_genes,NER
CUL4A	NER
CUL4B	DDD_genes
CUL5	NER_core,NER
CUX1	CGC_genes,Tarpey_drivers
CXCR2	Tarpey_drivers
CXCR4	CGC_genes
CYLD	CGC_genes,Tumor_Suppressor
CYP26B1	DDD_genes
CYP2C8	CGC_genes
CYSLTR2	CGC_genes
DAG1	DDD_genes
DAXX	CGC_genes,Other_CancerGene
DCAF12L2	CGC_genes
DCAF17	DDD_genes
DCC	CGC_genes
DCLRE1A	Other
DCLRE1B	Other
DCLRE1C	NHEJ
DCTN1	CGC_genes
DDB1	DDD_genes,NER
DDB2	Autosomal_Recessive,CGC_genes,NER
DDIT3	CGC_genes,Other_CancerGene
DDR2	CGC_genes
DDX10	CGC_genes,Other_CancerGene
DDX23	DDD_genes
DDX3X	CGC_genes,DDD_genes
DDX5	CGC_genes,Other_CancerGene
DDX6	CGC_genes,Other_CancerGene
DEAF1	DDD_genes
DEK	CGC_genes,Other_CancerGene
DGCR8	CGC_genes
DHDDS	DDD_genes
DHX30	DDD_genes
DICER1	Autosomal_Dominant,CGC_genes
DIP2B	Other_CancerGene
DIS3L2	Other_CancerGene
DKC1	Other_CancerGene
DLL1	DDD_genes
DMC1	HR
DNA2	HR
DNAH1	DDD_genes
DNAH5	Tarpey_drivers
DNAJB1	CGC_genes
DNM1	DDD_genes
DNM1L	DDD_genes
DNM2	CGC_genes,Other_CancerGene
DNMT3A	CGC_genes,DDD_genes,Other_CancerGene,Tarpey_drivers
DNTT	NHEJ
DPYSL5	DDD_genes
DROSHA	CGC_genes
DUSP10	Other_CancerGene
DUT	Other
DUX4L1	CGC_genes,Other_CancerGene
DYNC1H1	DDD_genes
DYRK1A	DDD_genes
EBF1	CGC_genes,Other_CancerGene
EBF3	DDD_genes
ECT2L	CGC_genes,Other_CancerGene,Tarpey_drivers
EED	CGC_genes
EEF1A2	DDD_genes
EFTUD2	DDD_genes
EGFR	CGC_genes,Kinase,Tarpey_drivers
EHMT1	DDD_genes
EID3	HR
EIF1AX	CGC_genes
EIF2AK2	DDD_genes
EIF3E	CGC_genes
EIF3H	Other_CancerGene
EIF4A2	CGC_genes,Other_CancerGene
ELANE	Other_CancerGene
ELF3	CGC_genes,Tarpey_drivers
ELF4	CGC_genes,Other_CancerGene
ELK4	CGC_genes,Other_CancerGene
ELL	CGC_genes,Other_CancerGene
ELMSAN1	DDD_genes
ELN	CGC_genes,Other_CancerGene
EME1	HR_core,HR
EME2	HR
EMILIN1	DDD_genes
EML4	CGC_genes,Other_CancerGene
ENDOV	Other
EP300	CGC_genes,DDD_genes,Other_CancerGene,Tarpey_drivers
EPAS1	CGC_genes
EPCAM	Autosomal_Dominant
EPHA3	CGC_genes,Tarpey_drivers
EPHA7	CGC_genes
EPPK1	Tarpey_drivers
EPS15	CGC_genes,Other_CancerGene
ERBB2	CGC_genes,Kinase,Tarpey_drivers
ERBB3	CGC_genes,Tarpey_drivers
ERBB4	CGC_genes,Tarpey_drivers
ERC1	CGC_genes
ERCC1	Autosomal_Recessive,NER_core,FA,HR,NER
ERCC2	Autosomal_Recessive,CGC_genes,NER_core,NER,Tarpey_drivers
ERCC3	Autosomal_Recessive,CGC_genes,NER
ERCC4	Autosomal_Recessive,CGC_genes,NER_core,FA,NER,Tarpey_drivers
ERCC5	Autosomal_Recessive,CGC_genes,NER_core,NER
ERCC6	NER_core,NER
ERCC8	NER
ERF	DDD_genes
ERG	CGC_genes,Other_CancerGene
ESR1	CGC_genes,Tarpey_drivers
ETNK1	CGC_genes
ETV1	CGC_genes,Other_CancerGene
ETV4	CGC_genes,Other_CancerGene
ETV5	CGC_genes,Other_CancerGene
ETV6	CGC_genes,Tumor_Suppressor
EWSR1	CGC_genes,Other_CancerGene
EXO1	MMR_core,HR,MMR
EXO5	Other
EXT1	CGC_genes,Tumor_Suppressor
EXT2	CGC_genes,Tumor_Suppressor
EZH2	CGC_genes,Other_CancerGene,Tarpey_drivers
EZR	CGC_genes,Other_CancerGene
FAAP100	FA
FAAP20	FA
FAAP24	FA
FAM111A	DDD_genes
FAM123B	Tarpey_drivers
FAM131B	CGC_genes
FAM135B	CGC_genes
FAM175A	NHEJ,Other_CancerGene
FAM46C	Other_CancerGene
FAM47C	CGC_genes
FAN1	FA
FANCA	Autosomal_Recessive,CGC_genes,FA_core,FA
FANCB	FA_core,FA,Other_CancerGene
FANCC	Autosomal_Recessive,CGC_genes,FA_core,FA
FANCD2	Autosomal_Recessive,CGC_genes,FA_core,FA
FANCE	Autosomal_Recessive,CGC_genes,FA
FANCF	Autosomal_Recessive,CGC_genes,FA
FANCG	Autosomal_Recessive,CGC_genes,FA,Tumor_Suppressor
FANCI	Autosomal_Recessive,FA_core,FA
FANCL	Autosomal_Recessive,FA_core,FA
FANCM	Autosomal_Recessive,FA_core,FA,HR
FAP	Other_CancerGene
FAS	CGC_genes
FAT1	CGC_genes
FAT3	CGC_genes
FAT4	CGC_genes
FBLN2	CGC_genes
FBN1	DDD_genes
FBXO11	CGC_genes,DDD_genes,Other_CancerGene
FBXW7	CGC_genes,DDD_genes,Tarpey_drivers,Tumor_Suppressor
FCGR2B	CGC_genes,Other_CancerGene
FCRL4	CGC_genes,Other_CancerGene
FEN1	BER,CGC_genes,BER_core,HR
FES	CGC_genes
FEV	CGC_genes,Other_CancerGene
FGF12	DDD_genes
FGFR1	CGC_genes,Kinase
FGFR1OP	CGC_genes,Other_CancerGene
FGFR2	CGC_genes,DDD_genes,Kinase,Tarpey_drivers
FGFR3	CGC_genes,DDD_genes,Kinase,Tarpey_drivers
FGFR4	CGC_genes
FGFRL1	DDD_genes
FH	Autosomal_Dominant,CGC_genes,Tumor_Suppressor
FHIT	CGC_genes,Tumor_Suppressor
FIP1L1	CGC_genes,Other_CancerGene
FKBP9	CGC_genes
FLCN	CGC_genes,Tumor_Suppressor
FLI1	CGC_genes,Other_CancerGene
FLNA	CGC_genes,Other_CancerGene
FLNC	DDD_genes
FLT3	CGC_genes,Kinase,Tarpey_drivers
FLT4	CGC_genes
FNBP1	CGC_genes,Other_CancerGene
FOXA1	CGC_genes,Tarpey_drivers
FOXD2	DDD_genes
FOXG1	DDD_genes
FOXK2	DDD_genes
FOXL2	CGC_genes,Other_CancerGene
FOXO1	CGC_genes,Tumor_Suppressor
FOXO3	CGC_genes,Tumor_Suppressor
FOXO4	CGC_genes,Tumor_Suppressor
FOXP1	CGC_genes,DDD_genes,Tarpey_drivers,Tumor_Suppressor
FOXR1	CGC_genes
FRG1	Other_CancerGene
FRG2	Other_CancerGene
FSTL3	CGC_genes,Other_CancerGene
FUBP1	CGC_genes,Other_CancerGene
FUS	CGC_genes,Other_CancerGene
G6PC3	Other_CancerGene
GABBR2	DDD_genes
GABRA1	DDD_genes
GABRG2	DDD_genes
GADD45A	Other
GADD45G	Other
GAR1	Other_CancerGene
GAS7	CGC_genes,Other_CancerGene
GATA1	CGC_genes,Other_CancerGene
GATA2	Autosomal_Dominant,CGC_genes
GATA3	CGC_genes,DDD_genes,Other_CancerGene,Tarpey_drivers
GATAD2B	DDD_genes
GEN1	HR_core,HR
GFAP	DDD_genes
GLI1	CGC_genes
GLYR1	DDD_genes
GMPS	CGC_genes,Other_CancerGene
GNA11	CGC_genes,Other_CancerGene
GNAI1	DDD_genes
GNAO1	DDD_genes
GNAQ	CGC_genes,Other_CancerGene
GNAS	CGC_genes,DDD_genes,Other_CancerGene,Tarpey_drivers
GNB1	DDD_genes
GOLGA5	CGC_genes,Other_CancerGene
GOPC	CGC_genes,Other_CancerGene
GPC3	CGC_genes,Tumor_Suppressor
GPC5	CGC_genes
GPHN	CGC_genes,Other_CancerGene
GPRC5D	DDD_genes
GPT	DDD_genes
GRAMD2A	DDD_genes
GREM1	Other_CancerGene
GRIN1	DDD_genes
GRIN2A	CGC_genes
GRIN2B	DDD_genes
GRM3	CGC_genes
GTF2H1	NER
GTF2H2	NER
GTF2H3	NER
GTF2H4	NER
GTF2H5	NER
H2AFX	HR
H3F3A	CGC_genes,DDD_genes,Other_CancerGene,Tarpey_drivers
H3F3B	CGC_genes,Tarpey_drivers
H3F3C	Tarpey_drivers
HAX1	Other_CancerGene
HDAC4	DDD_genes
HDAC8	DDD_genes
HECTD4	DDD_genes
HECW2	DDD_genes
HELQ	FA,HR
HERC2	Other
HERPUD1	CGC_genes,Other_CancerGene
HES1	FA
HEY1	CGC_genes,Other_CancerGene
HFM1	HR
HGF	Tarpey_drivers
HIF1A	CGC_genes
HIP1	CGC_genes,Other_CancerGene
HIST1H1E	DDD_genes
HIST1H3B	CGC_genes
HIST1H4E	DDD_genes
HIST1H4I	CGC_genes,DDD_genes,Other_CancerGene
HIVEP2	DDD_genes
HK1	DDD_genes
HLA-A	CGC_genes
HLF	CGC_genes,Other_CancerGene
HLTF	TLS
HMGA1	CGC_genes,Other_CancerGene
HMGA2	CGC_genes,Other_CancerGene
HMGB1	BER,MMR,TLS
HMGB2	BER
HMGN2P46	CGC_genes,Other_CancerGene
HMGXB3	DDD_genes
HNF1A	CGC_genes
HNF4A	DDD_genes
HNRNPA2B1	CGC_genes,Other_CancerGene
HNRNPD	DDD_genes
HOOK3	CGC_genes,Other_CancerGene
HOXA11	CGC_genes,Other_CancerGene
HOXA13	CGC_genes,Other_CancerGene
HOXA9	CGC_genes,Other_CancerGene
HOXB13	Tumor_Suppressor
HOXC11	CGC_genes,Other_CancerGene
HOXC13	CGC_genes,Other_CancerGene
HOXD11	CGC_genes,Other_CancerGene
HOXD13	CGC_genes,Other_CancerGene
HRAS	Autosomal_Dominant,CGC_genes,DDD_genes,Tarpey_drivers
HSD17B4	DDD_genes
HSP90AA1	CGC_genes,Other_CancerGene
HSP90AB1	CGC_genes,Other_CancerGene
HSPA12B	DDD_genes
HUS1	Other
HUWE1	DDD_genes
ID3	CGC_genes
IDH1	CGC_genes,Other,Tarpey_drivers,Tumor_Suppressor
IDH2	CGC_genes,Other_CancerGene,Tarpey_drivers
IFIH1	DDD_genes
IGF2BP2	CGC_genes
IGF2R	Tumor_Suppressor
IGH	CGC_genes,Other_CancerGene
IGK	CGC_genes,Other_CancerGene
IGL	CGC_genes,Other_CancerGene
IKBKB	CGC_genes
IKZF1	CGC_genes,Other_CancerGene
IKZF3	CGC_genes
IL2	CGC_genes,Other_CancerGene
IL21R	CGC_genes,Other_CancerGene
IL6ST	CGC_genes,Other_CancerGene
IL7R	CGC_genes,Other_CancerGene
INO80	HR
IQSEC2	DDD_genes
IRF2BPL	DDD_genes
IRF4	CGC_genes,Other_CancerGene
IRS4	CGC_genes
ISX	CGC_genes
ITGA3	DDD_genes
ITGAV	CGC_genes
ITK	CGC_genes,Kinase
ITPR1	DDD_genes
ITSN1	DDD_genes
JAK1	CGC_genes,Kinase
JAK2	CGC_genes,Kinase
JAK3	CGC_genes,Kinase
JAZF1	CGC_genes,Other_CancerGene
JUN	CGC_genes,Other_CancerGene
KANSL1	DDD_genes
KAT5	HR
KAT6A	CGC_genes,DDD_genes,Other_CancerGene
KAT6B	CGC_genes,DDD_genes,Other_CancerGene
KAT7	CGC_genes
KAT8	DDD_genes
KBTBD7	DDD_genes
KCNA1	DDD_genes
KCNA2	DDD_genes
KCNB1	DDD_genes
KCNC1	DDD_genes
KCNC3	DDD_genes
KCNH1	DDD_genes
KCNJ5	CGC_genes
KCNK3	DDD_genes
KCNK9	DDD_genes
KCNMA1	DDD_genes
KCNQ2	DDD_genes
KCNQ3	DDD_genes
KCNT1	DDD_genes
KDM5A	CGC_genes,Other_CancerGene
KDM5B	DDD_genes
KDM5C	CGC_genes,Other_CancerGene,Tarpey_drivers
KDM6A	CGC_genes,DDD_genes,Other_CancerGene,Tarpey_drivers
KDR	CGC_genes,Kinase
KDSR	CGC_genes,Other_CancerGene
KEAP1	CGC_genes,Tarpey_drivers
KIAA0100	DDD_genes
KIAA1549	CGC_genes,Other_CancerGene
KIF1A	DDD_genes
KIF22	DDD_genes
KIF5B	CGC_genes,Other_CancerGene
KIF5C	DDD_genes
KIT	CGC_genes,Kinase,Tarpey_drivers
KLF4	CGC_genes
KLF6	CGC_genes,Tumor_Suppressor
KLF7	DDD_genes
KLK2	CGC_genes,Other_CancerGene
KMT2A	CGC_genes,DDD_genes,Other_CancerGene
KMT2C	CGC_genes,DDD_genes,Other_CancerGene
KMT2D	CGC_genes,DDD_genes,Other_CancerGene
KMT2E	DDD_genes
KNL1	CGC_genes
KNSTRN	CGC_genes
KRAS	Autosomal_Dominant,CGC_genes,DDD_genes,Tarpey_drivers
KRTAP1-5	Tarpey_drivers
KTN1	CGC_genes,Other_CancerGene
LAMA5	Other_CancerGene
LAMB1	DDD_genes
LARP4B	CGC_genes
LAS1L	DDD_genes
LASP1	CGC_genes,Other_CancerGene
LATS1	CGC_genes
LATS2	CGC_genes
LCK	CGC_genes,Kinase
LCP1	CGC_genes,Other_CancerGene
LEF1	CGC_genes
LEPROTL1	CGC_genes
LHFP	Other_CancerGene
LHFPL6	CGC_genes
LIFR	CGC_genes,Other_CancerGene,Tarpey_drivers
LIG1	BER,HR,MMR,NER
LIG3	BER
LIG4	NHEJ_core,NHEJ
LMBRD2	DDD_genes
LMNA	CGC_genes
LMNB2	DDD_genes
LMO1	CGC_genes,Other_CancerGene
LMO2	CGC_genes,Other_CancerGene
LNPEP	DDD_genes
LPP	CGC_genes,Other_CancerGene
LRBA	DDD_genes
LRIG3	CGC_genes,Tumor_Suppressor
LRP1	DDD_genes
LRP1B	CGC_genes
LRRK2	Tarpey_drivers
LSM14A	CGC_genes
LYL1	CGC_genes,Other_CancerGene
LYN	CGC_genes
LZTR1	CGC_genes,DDD_genes
LZTS2	DDD_genes
MACC1	CGC_genes
MAD2L2	FA,TLS
MAF	CGC_genes,DDD_genes,Tumor_Suppressor
MAFB	CGC_genes,Tumor_Suppressor
MAGEL2	DDD_genes
MALAT1	CGC_genes,Other_CancerGene
MALT1	CGC_genes,DDD_genes,Other_CancerGene
MAML2	CGC_genes,Other_CancerGene
MAP2K1	Autosomal_Dominant,CGC_genes,DDD_genes,Kinase
MAP2K2	Autosomal_Dominant,CGC_genes,Kinase
MAP2K4	CGC_genes,Kinase,Tarpey_drivers,Tumor_Suppressor
MAP3K1	CGC_genes,Tarpey_drivers
MAP3K13	CGC_genes,Tarpey_drivers
MAP3K7	DDD_genes
MAP3K9	DDD_genes
MAP4K4	DDD_genes
MAPK1	CGC_genes
MAPK8IP1	Tarpey_drivers
MAPK8IP3	DDD_genes
MAST1	DDD_genes
MAST4	DDD_genes
MAX	Autosomal_Dominant,CGC_genes,DDD_genes
MB21D2	CGC_genes
MBD4	BER
MDC1	Others_core,Other
MDM2	CGC_genes,Other_CancerGene
MDM4	CGC_genes,Other_CancerGene
MDS2	CGC_genes,Other_CancerGene
MECOM	CGC_genes,Other_CancerGene,Tarpey_drivers
MECP2	DDD_genes
MED12	CGC_genes,Other_CancerGene
MED13L	DDD_genes
MED23	Tarpey_drivers
MEF2C	DDD_genes
MEN1	ACMG,Autosomal_Dominant,CGC_genes,Tarpey_drivers,Tumor_Suppressor
MET	CGC_genes,Kinase
MEX3B	DDD_genes
MFN2	DDD_genes,Other_CancerGene
MGMT	CGC_genes,DR_core,DR
MITF	CGC_genes,Other_CancerGene
MKL1	Other_CancerGene
MLF1	CGC_genes,Other_CancerGene
MLH1	ACMG,Autosomal_Dominant,CGC_genes,MMR_core,MMR,Tarpey_drivers,Tumor_Suppressor
MLH3	MMR_core,MMR
MLL2	Tarpey_drivers
MLL3	Tarpey_drivers
MLL4	Tarpey_drivers
MLLT1	CGC_genes,Other_CancerGene
MLLT10	CGC_genes,Other_CancerGene
MLLT11	CGC_genes,Other_CancerGene
MLLT3	CGC_genes,DDD_genes,Other_CancerGene
MLLT4	Other_CancerGene,Tarpey_drivers
MLLT6	CGC_genes,Other_CancerGene
MMGT1	DDD_genes
MMS19	NER
MN1	CGC_genes,DDD_genes,Tumor_Suppressor
MNAT1	NER
MNX1	CGC_genes,Other_CancerGene
MOBP	DDD_genes
MORC2	DDD_genes
MORF4L1	Other
MPG	BER
MPL	CGC_genes,Other_CancerGene
MPLKIP	Other
MPRIP	DDD_genes
MRE11A	HR_core,HR,NHEJ,Other_CancerGene
MRPL40	Other
MRTFA	CGC_genes
MSH2	ACMG,Autosomal_Dominant,CGC_genes,MMR_core,MMR,Tarpey_drivers,Tumor_Suppressor
MSH3	MMR_core,MMR
MSH6	ACMG,Autosomal_Dominant,CGC_genes,MMR_core,MMR
MSI2	CGC_genes,Other_CancerGene
MSN	CGC_genes,Other_CancerGene
MSS51	DDD_genes
MTCP1	CGC_genes,Other_CancerGene
MTF2	DDD_genes
MTOR	CGC_genes,DDD_genes,Tarpey_drivers
MUC1	CGC_genes,Tumor_Suppressor
MUC16	CGC_genes
MUC4	CGC_genes
MUC5B	DDD_genes
MUS81	HR_core,HR
MUTYH	ACMG,Autosomal_Recessive,BER,CGC_genes,Tarpey_drivers,Tumor_Suppressor
MVD	DDD_genes
MYB	CGC_genes,Other_CancerGene
MYC	CGC_genes,Other_CancerGene
MYCL	CGC_genes,Other_CancerGene
MYCN	CGC_genes,Other_CancerGene
MYD88	CGC_genes,Other_CancerGene
MYH11	CGC_genes
MYH9	CGC_genes
MYNN	Other_CancerGene
MYO5A	CGC_genes
MYOD1	CGC_genes
MYOF	DDD_genes
N4BP2	CGC_genes
NAA10	DDD_genes
NAB2	CGC_genes
NABP2	Other
NACA	CGC_genes,Other_CancerGene
NACC1	DDD_genes
NARS	DDD_genes
NAV3	Tarpey_drivers
NBEA	CGC_genes
NBN	Autosomal_Recessive,CGC_genes,HR_core,HR,NHEJ
NCKIPSD	CGC_genes,Other_CancerGene
NCOA1	CGC_genes,Other_CancerGene
NCOA2	CGC_genes,Other_CancerGene
NCOA4	CGC_genes,DDD_genes,Tumor_Suppressor
NCOR1	CGC_genes,Tarpey_drivers
NCOR2	CGC_genes
NDRG1	CGC_genes,Tumor_Suppressor
NEDD4L	DDD_genes
NEIL1	BER
NEIL2	BER
NEIL3	BER
NEXMIF	DDD_genes
NF1	Autosomal_Dominant,CGC_genes,DDD_genes,Tarpey_drivers,Tumor_Suppressor
NF2	ACMG,Autosomal_Dominant,CGC_genes,Tarpey_drivers,Tumor_Suppressor
NFATC2	CGC_genes
NFATC2IP	HR
NFE2L1	DDD_genes
NFE2L2	CGC_genes,Other_CancerGene,Tarpey_drivers
NFE2L3	Tarpey_drivers
NFIA	DDD_genes
NFIB	CGC_genes,Other_CancerGene
NFIX	DDD_genes
NFKB2	CGC_genes,Other_CancerGene
NFKBIE	CGC_genes
NHEJ1	NHEJ_core,NHEJ
NHP2	Autosomal_Recessive
NIN	CGC_genes,Other_CancerGene
NKX2-1	CGC_genes,Other_CancerGene
NOC2L	DDD_genes
NOC3L	DDD_genes
NOC4L	DDD_genes
NONO	CGC_genes,Other_CancerGene
NOP10	Autosomal_Recessive
NOTCH1	CGC_genes,Tarpey_drivers,Tumor_Suppressor
NOTCH2	CGC_genes,Other_CancerGene,Tarpey_drivers
NPAT	Other_CancerGene
NPM1	CGC_genes,Other_CancerGene,Tarpey_drivers
NR2F1	DDD_genes
NR4A3	CGC_genes,Tumor_Suppressor
NRAS	Autosomal_Dominant,CGC_genes,Tarpey_drivers
NRG1	CGC_genes
NSD1	CGC_genes,Other_CancerGene
NSD2	CGC_genes
NSD3	CGC_genes
NSMCE1	HR
NSMCE2	HR
NSMCE3	HR
NSMCE4A	HR
NT5C2	CGC_genes
NTHL1	BER,CGC_genes
NTRK1	CGC_genes,Kinase
NTRK2	DDD_genes
NTRK3	CGC_genes,Kinase
NUDT1	NP
NUDT15	NP
NUDT18	NP
NUMA1	CGC_genes,Other_CancerGene
NUP214	CGC_genes,Other_CancerGene
NUP98	CGC_genes,Other_CancerGene
NUTM1	CGC_genes,Other_CancerGene
NUTM2A	Other_CancerGene
NUTM2B	CGC_genes,Other_CancerGene
NUTM2D	CGC_genes
ODC1	DDD_genes
OGG1	BER
OGT	DDD_genes
OLIG2	CGC_genes,Other_CancerGene
OMD	CGC_genes,Other_CancerGene
ORAI1	DDD_genes
OTX2	Other_CancerGene
P2RY8	CGC_genes,Other_CancerGene
PABPC1	CGC_genes
PACS1	DDD_genes
PACS2	DDD_genes
PAFAH1B2	CGC_genes
PAK4	DDD_genes
PALB2	Autosomal_Dominant,CGC_genes,HR_core,FA,HR,Tarpey_drivers,Tumor_Suppressor
PALLD	Other_CancerGene
PARG	BER,HR,NHEJ
PARP1	BER,BER_core,HR,NHEJ
PARP2	BER,HR
PARP3	BER,NHEJ
PARP4	BER
PARPBP	HR
PATZ1	CGC_genes,Other_CancerGene
PAX2	DDD_genes
PAX3	CGC_genes,Other_CancerGene
PAX5	Autosomal_Dominant,CGC_genes,Tumor_Suppressor
PAX7	CGC_genes,Other_CancerGene
PAX8	CGC_genes,Other_CancerGene
PAXIP1	HR
PBRM1	CGC_genes,Tarpey_drivers,Tumor_Suppressor
PBX1	CGC_genes,DDD_genes,Other_CancerGene
PBX3	DDD_genes
PCBP1	CGC_genes,Tarpey_drivers
PCGF2	DDD_genes
PCM1	CGC_genes,Other_CancerGene
PCNA	BER,HR,MMR,NER,TLS
PCSK7	Other_CancerGene
PDCD1LG2	CGC_genes,Other_CancerGene
PDE4DIP	CGC_genes,Other_CancerGene
PDGFB	CGC_genes,Other_CancerGene
PDGFRA	CGC_genes,Kinase,Tarpey_drivers
PDGFRB	CGC_genes,DDD_genes,Kinase
PDHA1	DDD_genes
PELP1	DDD_genes
PER1	CGC_genes,Other_CancerGene,Other
PHF21A	DDD_genes
PHF6	CGC_genes,Tarpey_drivers,Tumor_Suppressor
PHOX2B	Autosomal_Dominant,CGC_genes
PICALM	CGC_genes,Other_CancerGene
PIK3CA	CGC_genes,DDD_genes,Kinase,Other_CancerGene,Tarpey_drivers
PIK3CB	CGC_genes
PIK3CG	Tarpey_drivers
PIK3R1	CGC_genes,DDD_genes,Kinase,Other_CancerGene,Tarpey_drivers
PIK3R2	DDD_genes
PIM1	CGC_genes,Kinase,Other_CancerGene
PINK1	Kinase,Other_CancerGene
PIP5K1C	DDD_genes
PKLR	DDD_genes
PLAG1	CGC_genes,Other_CancerGene
PLAU	DDD_genes
PLCG1	CGC_genes,Tarpey_drivers
PLK3	Other
PLRG1	Other
PLXNA1	DDD_genes
PMEL	Other_CancerGene
PML	CGC_genes,Tumor_Suppressor
PMS1	CGC_genes,MMR_core,MMR,Tumor_Suppressor
PMS2	ACMG,Autosomal_Dominant,CGC_genes,MMR_core,MMR,Tarpey_drivers,Tumor_Suppressor
PNKP	BER,NHEJ
POGZ	DDD_genes
POLA1	Other
POLB	BER,BER_core,NHEJ,TLS
POLD1	BER,CGC_genes,HR,MMR,NER,Other_CancerGene
POLD2	BER,HR,MMR,NER
POLD3	BER,HR,MMR,NER,Other_CancerGene
POLD4	BER,HR,MMR,NER
POLE	BER,CGC_genes,NER_core,NER,Other_CancerGene
POLE2	BER,NER
POLE3	BER,NER_core,NER
POLE4	BER,NER
POLG	CGC_genes,Other
POLH	HR,TLS
POLI	TLS
POLK	BER,TLS
POLL	BER,NHEJ_core,NHEJ
POLM	NHEJ_core,NHEJ,TLS
POLN	TLS_core,TLS
POLQ	CGC_genes,TLS_core,HR,Tarpey_drivers,TLS
POLR1A	DDD_genes
POLR2A	CGC_genes,DDD_genes
POM121L2	DDD_genes
POT1	CGC_genes,Other_CancerGene
POU2AF1	CGC_genes,Other_CancerGene
POU2F2	DDD_genes
POU3F3	DDD_genes
POU5F1	CGC_genes,Other_CancerGene
PPARG	CGC_genes,Other_CancerGene
PPARGC1B	DDD_genes
PPFIBP1	CGC_genes
PPM1D	CGC_genes,DDD_genes,Other_CancerGene
PPP1CB	DDD_genes
PPP2CA	DDD_genes
PPP2R1A	CGC_genes,DDD_genes,Other_CancerGene,Tarpey_drivers
PPP2R2B	DDD_genes
PPP2R5D	DDD_genes
PPP4C	HR
PPP4R1	HR
PPP4R2	HR
PPP4R4	HR
PPP6C	CGC_genes
PQLC1	DDD_genes
PRCC	CGC_genes,Other_CancerGene
PRDM1	CGC_genes,Tarpey_drivers,Tumor_Suppressor
PRDM16	CGC_genes,Other_CancerGene
PRDM2	CGC_genes
PREX2	CGC_genes,Tarpey_drivers
PRF1	CGC_genes,Other_CancerGene
PRKACA	CGC_genes
PRKAR1A	Autosomal_Dominant,CGC_genes,Kinase,Tumor_Suppressor
PRKAR1B	DDD_genes
PRKCB	CGC_genes
PRKD1	CGC_genes,DDD_genes
PRKDC	NHEJ_core,NHEJ
PROB1	DDD_genes
PRPF19	Other
PRPF40B	CGC_genes
PRPF8	DDD_genes
PRRX1	CGC_genes,Other_CancerGene
PRSS50	DDD_genes
PRX	Tarpey_drivers
PSIP1	CGC_genes,Other_CancerGene
PSMC5	DDD_genes
PTCH1	Autosomal_Dominant,CGC_genes,Tarpey_drivers,Tumor_Suppressor
PTCHD3	Tarpey_drivers
PTEN	Autosomal_Dominant,CGC_genes,DDD_genes,Other,Tarpey_drivers,Tumor_Suppressor
PTK6	CGC_genes
PTPN11	Autosomal_Dominant,CGC_genes,DDD_genes,Tarpey_drivers
PTPN13	CGC_genes
PTPN6	CGC_genes
PTPRB	CGC_genes,Tarpey_drivers
PTPRC	CGC_genes
PTPRD	CGC_genes
PTPRK	CGC_genes
PTPRT	CGC_genes,Tarpey_drivers
PURA	DDD_genes
PWWP2A	CGC_genes
PYGM	DDD_genes
QKI	CGC_genes
RAB11A	DDD_genes
RAB14	DDD_genes
RAB27A	Other_CancerGene
RABEP1	CGC_genes,Other_CancerGene
RAC1	CGC_genes,DDD_genes
RAD1	Other
RAD17	CGC_genes,Other
RAD18	TLS
RAD21	CGC_genes,Tarpey_drivers
RAD23A	NER
RAD23B	NER
RAD50	HR_core,HR,NHEJ,Other_CancerGene
RAD51	HR_core,FA,HR
RAD51B	CGC_genes,HR,Other_CancerGene
RAD51C	Autosomal_Recessive,FA,HR,Tumor_Suppressor
RAD51D	HR,Other_CancerGene
RAD52	HR_core,HR
RAD54B	HR
RAD54L	HR
RAD9A	Other
RAD9B	Other
RAF1	Autosomal_Dominant,CGC_genes,DDD_genes,Tarpey_drivers
RAG1	Other_CancerGene
RAG2	Other_CancerGene
RALGDS	CGC_genes,Other_CancerGene
RANBP17	Other_CancerGene
RANBP2	CGC_genes
RAP1GDS1	CGC_genes,Other_CancerGene
RARA	CGC_genes,Other_CancerGene
RB1	ACMG,Autosomal_Dominant,CGC_genes,Tarpey_drivers,Tumor_Suppressor
RBBP6	DDD_genes
RBBP8	HR_core,HR
RBM10	CGC_genes
RBM12	DDD_genes
RBM15	CGC_genes,Other_CancerGene
RBM8A	Other_CancerGene
RBMXL3	DDD_genes
RBX1	NER
RDM1	HR
RECQL	HR
RECQL4	Autosomal_Recessive,CGC_genes,HR
RECQL5	HR
REL	CGC_genes,Other_CancerGene
RET	ACMG,Autosomal_Dominant,CGC_genes,DDD_genes,Kinase
REV1	TLS_core,TLS
REV3L	TLS_core,TLS
RFC1	BER,HR,MMR,NER
RFC2	BER,HR,MMR,NER
RFC3	BER,HR,MMR,NER
RFC4	BER,HR,MMR,NER
RFC5	BER,HR,MMR,NER
RFWD3	CGC_genes
RGPD3	CGC_genes
RGS7	CGC_genes
RHBDF2	Other_CancerGene
RHOA	CGC_genes,Tarpey_drivers
RHOB	DDD_genes
RHOBTB2	DDD_genes
RHOH	CGC_genes,Other_CancerGene
RHPN2	Other_CancerGene
RIF1	NHEJ,Other
RIPK3	DDD_genes
RMI1	FA,HR
RMI2	CGC_genes,FA,HR,Other_CancerGene
RNF103	Tarpey_drivers
RNF168	NHEJ
RNF169	Other
RNF213	CGC_genes,Other_CancerGene
RNF4	Other
RNF43	CGC_genes
RNF8	NHEJ
RNMT	Others_core,Other
ROBO2	CGC_genes
ROS1	CGC_genes,Kinase
RPA1	HR,MMR,NER
RPA2	HR,MMR,NER
RPA3	HR,MMR,NER
RPA4	HR,MMR,NER
RPL10	CGC_genes
RPL11	Other_CancerGene
RPL22	CGC_genes,Other_CancerGene,Tarpey_drivers
RPL35A	Other_CancerGene
RPL5	CGC_genes,Other_CancerGene,Tarpey_drivers
RPN1	CGC_genes,Other_CancerGene
RPS17	Other_CancerGene
RPS19	Other_CancerGene
RPS24	Other_CancerGene
RPS7	Other_CancerGene
RRM1	NP
RRM2	NP
RRM2B	Other
RSPO2	CGC_genes
RSPO3	CGC_genes
RTEL1	HR,Other_CancerGene
RUNX1	Autosomal_Dominant,CGC_genes,Tarpey_drivers
RUNX1T1	CGC_genes
S100A7	CGC_genes
SALL4	CGC_genes
SAMD9	DDD_genes
SATB1	DDD_genes
SATB2	DDD_genes
SBDS	CGC_genes,Other_CancerGene
SCG5	Other_CancerGene
SCN1A	DDD_genes
SCN2A	DDD_genes
SCN3A	DDD_genes
SCN4A	DDD_genes
SCN8A	DDD_genes
SCN9A	Other_CancerGene
SDC4	CGC_genes,Other_CancerGene
SDHA	Autosomal_Dominant,CGC_genes,Tumor_Suppressor
SDHAF2	ACMG,Autosomal_Dominant,CGC_genes
SDHB	ACMG,Autosomal_Dominant,CGC_genes,Tumor_Suppressor
SDHC	ACMG,Autosomal_Dominant,CGC_genes
SDHD	ACMG,Autosomal_Dominant,CGC_genes,Tumor_Suppressor
SEPT2	DDD_genes
SEPT5	CGC_genes,DDD_genes,Other_CancerGene
SEPT6	CGC_genes,Other_CancerGene
SEPT9	CGC_genes,Other_CancerGene
SET	CGC_genes,DDD_genes,Other_CancerGene
SETBP1	CGC_genes,DDD_genes,Tarpey_drivers
SETD1A	DDD_genes
SETD1B	CGC_genes
SETD2	CGC_genes,DDD_genes,Other_CancerGene,Tarpey_drivers
SETD5	DDD_genes
SETDB1	CGC_genes
SETMAR	Other
SETX	DDD_genes
SF3B1	CGC_genes,Other_CancerGene,Tarpey_drivers
SFPQ	CGC_genes,Other_CancerGene
SFRP4	CGC_genes
SGK1	CGC_genes
SH2B3	Autosomal_Recessive,CGC_genes
SH2D1A	Other_CancerGene
SH3GL1	CGC_genes,Other_CancerGene
SHANK3	DDD_genes
SHFM1	HR_core,HR
SHOC2	Autosomal_Dominant,DDD_genes
SHPRH	TLS_core,TLS
SHROOM2	Other_CancerGene
SHTN1	CGC_genes
SIK3	DDD_genes
SIN3A	Tarpey_drivers
SIRPA	CGC_genes
SIX1	CGC_genes
SIX2	CGC_genes
SKI	CGC_genes
SLC13A2	DDD_genes
SLC18A3	DDD_genes
SLC24A4	DDD_genes
SLC34A2	CGC_genes,Other_CancerGene
SLC39A6	DDD_genes
SLC45A3	CGC_genes,Other_CancerGene
SLC6A1	DDD_genes
SLX1A	HR_core,FA,HR
SLX1B	HR
SLX4	FA,HR,Other
SMAD2	CGC_genes,Tarpey_drivers
SMAD3	CGC_genes,Tarpey_drivers
SMAD4	Autosomal_Dominant,CGC_genes,DDD_genes,Tarpey_drivers,Tumor_Suppressor
SMAD7	Other_CancerGene
SMARCA2	DDD_genes
SMARCA4	Autosomal_Dominant,CGC_genes,DDD_genes,Other,Tarpey_drivers,Tumor_Suppressor
SMARCAD1	HR
SMARCB1	Autosomal_Dominant,CGC_genes,DDD_genes,Tumor_Suppressor
SMARCC1	Other
SMARCD1	CGC_genes,Tarpey_drivers
SMARCE1	CGC_genes
SMC1A	CGC_genes,DDD_genes,Other_CancerGene,Tarpey_drivers
SMC3	DDD_genes,Tarpey_drivers
SMC5	HR
SMC6	HR
SMO	CGC_genes,Tumor_Suppressor
SMUG1	BER
SNAP25	DDD_genes
SND1	CGC_genes
SNX29	CGC_genes,Other_CancerGene
SOCS1	CGC_genes,Tumor_Suppressor
SON	DDD_genes
SOS1	Autosomal_Dominant,DDD_genes
SOX11	DDD_genes
SOX17	Tarpey_drivers
SOX2	CGC_genes,Other_CancerGene
SOX21	CGC_genes
SOX4	Other
SOX9	Tarpey_drivers
SP4	DDD_genes
SPECC1	CGC_genes,Other_CancerGene
SPEN	CGC_genes,Tarpey_drivers
SPO11	HR
SPOP	CGC_genes,Tarpey_drivers
SPRED1	Other_CancerGene
SPRTN	Other
SPTAN1	DDD_genes
SPTB	DDD_genes
SPTBN2	DDD_genes
SPTSSA	DDD_genes
SRC	CGC_genes
SRCAP	DDD_genes
SRGAP3	CGC_genes,Other_CancerGene
SRRM2	DDD_genes
SRSF2	CGC_genes,Other_CancerGene
SRSF3	CGC_genes,Other_CancerGene
SS18	CGC_genes,Other_CancerGene
SS18L1	CGC_genes,Other_CancerGene
SSX1	CGC_genes,Other_CancerGene
SSX2	CGC_genes,Other_CancerGene
SSX4	CGC_genes,Other_CancerGene
STAG1	CGC_genes,DDD_genes
STAG2	CGC_genes,Tarpey_drivers
STAT3	CGC_genes
STAT5B	CGC_genes
STAT6	CGC_genes
STIL	CGC_genes
STK11	ACMG,Autosomal_Dominant,CGC_genes,Kinase,Tarpey_drivers,Tumor_Suppressor
STMN2	DDD_genes
STRA13	FA
STRN	CGC_genes
STX11	Other_CancerGene
STX1B	DDD_genes
STXBP1	DDD_genes
STXBP2	Other_CancerGene
SUFU	Autosomal_Dominant,CGC_genes,Tarpey_drivers,Tumor_Suppressor
SUZ12	CGC_genes,Other_CancerGene
SWI5	Other
SWSAP1	HR
SYK	CGC_genes,Kinase,Tumor_Suppressor
SYNGAP1	DDD_genes
SYT1	DDD_genes
TAF1	Tarpey_drivers
TAF15	CGC_genes,Other_CancerGene
TAL1	CGC_genes,Other_CancerGene
TAL2	CGC_genes,Other_CancerGene
TAS1R3	DDD_genes
TBC1D16	DDD_genes
TBL1XR1	CGC_genes,DDD_genes,Tarpey_drivers
TBR1	DDD_genes
TBX3	CGC_genes,Tarpey_drivers
TCEA1	CGC_genes,NER,Other_CancerGene
TCEB1	NER
TCEB2	NER
TCEB3	NER
TCF12	CGC_genes,Other_CancerGene
TCF20	DDD_genes
TCF3	CGC_genes,Other_CancerGene
TCF4	DDD_genes
TCF7L1	Other_CancerGene
TCF7L2	CGC_genes,Tarpey_drivers,Tumor_Suppressor
TCL1A	CGC_genes,Other_CancerGene
TCL6	Other_CancerGene
TDG	BER,BER_core
TDP1	BER,BER_core
TDP2	Other
TEC	CGC_genes
TELO2	FA
TENT5C	CGC_genes
TERT	Autosomal_Recessive,CGC_genes
TET1	CGC_genes,Other_CancerGene
TET2	CGC_genes,Tarpey_drivers,Tumor_Suppressor
TFAP2A	DDD_genes
TFE3	CGC_genes,DDD_genes,Tumor_Suppressor
TFEB	CGC_genes
TFG	CGC_genes,Other_CancerGene
TFPT	CGC_genes,Other_CancerGene
TFRC	CGC_genes,Other_CancerGene
TGFBR1	Other_CancerGene
TGFBR2	CGC_genes,Other_CancerGene,Tarpey_drivers,Tumor_Suppressor
THEGL	DDD_genes
THRAP3	CGC_genes,Other_CancerGene
TINF2	Other_CancerGene
TLK2	DDD_genes
TLR4	Tarpey_drivers
TLX1	CGC_genes,Other_CancerGene
TLX3	CGC_genes,Other_CancerGene
TMEM106B	DDD_genes
TMEM127	Autosomal_Dominant,CGC_genes,Tumor_Suppressor
TMEM169	DDD_genes
TMPRSS2	CGC_genes,Other_CancerGene
TMSB4X	CGC_genes
TNC	CGC_genes
TNFAIP3	CGC_genes,Tumor_Suppressor
TNFRSF14	CGC_genes,Other_CancerGene
TNFRSF17	CGC_genes,Other_CancerGene
TNK2	DDD_genes
TNNC2	DDD_genes
TNS3	DDD_genes
TOP1	CGC_genes,Other_CancerGene
TOP3A	HR_core,FA,HR
TOP3B	FA,HR
TOPBP1	Others_core,Other
TP53	ACMG,Autosomal_Dominant,CGC_genes,Other,Tarpey_drivers,Tumor_Suppressor
TP53BP1	HR_core,HR,NHEJ,Tarpey_drivers
TP63	CGC_genes
TPM3	CGC_genes,Other_CancerGene
TPM4	CGC_genes,Other_CancerGene
TPO	DDD_genes
TPR	CGC_genes,Other_CancerGene
TRA	CGC_genes,Other_CancerGene
TRAF7	CGC_genes,DDD_genes
TRB	CGC_genes,Other_CancerGene
TRD	CGC_genes,Other_CancerGene
TREX1	Others_core,Other
TREX2	Other
TRG	Other_CancerGene
TRIM24	CGC_genes,Tumor_Suppressor
TRIM27	CGC_genes,Other_CancerGene
TRIM33	CGC_genes,Other_CancerGene
TRIO	DDD_genes
TRIP11	CGC_genes,Other_CancerGene
TRPM3	DDD_genes
TRRAP	CGC_genes,DDD_genes
TSC1	ACMG,Autosomal_Dominant,CGC_genes,Tarpey_drivers,Tumor_Suppressor
TSC2	ACMG,Autosomal_Dominant,CGC_genes,Tumor_Suppressor
TSHR	CGC_genes,Other_CancerGene
TSHZ2	Tarpey_drivers
TSHZ3	Tarpey_drivers
TTK	Other
TTL	Other_CancerGene
TUBB4A	DDD_genes
TUBB4B	DDD_genes
TXNDC5	DDD_genes
TYK2	Kinase
TYMS	Other
U2AF1	CGC_genes,Other_CancerGene,Tarpey_drivers
U2AF2	DDD_genes
UBE2A	MMR,TLS
UBE2B	TLS
UBE2N	TLS
UBE2T	FA_core,FA
UBE2V2	TLS
UBE3A	DDD_genes
UBR5	CGC_genes
UBTF	DDD_genes
UIMC1	HR
UNC13D	Other_CancerGene
UNG	BER,BER_core
UPF1	DDD_genes
USP1	FA,TLS
USP11	DDD_genes
USP44	CGC_genes
USP6	CGC_genes,Other_CancerGene
USP8	CGC_genes
USP9X	CGC_genes,DDD_genes,Tarpey_drivers
UVSSA	NER
VAV1	CGC_genes
VHL	ACMG,Autosomal_Dominant,CGC_genes,Tarpey_drivers,Tumor_Suppressor
VPS4A	DDD_genes
VTI1A	CGC_genes,Other_CancerGene
WAC	DDD_genes
WAS	CGC_genes,Other_CancerGene
WDCP	CGC_genes
WDR37	DDD_genes
WDR45	DDD_genes
WDR48	FA,TLS
WEE1	Other
WFS1	DDD_genes
WHSC1	Other_CancerGene
WIF1	CGC_genes,Tumor_Suppressor
WNK2	CGC_genes
WRAP53	Other_CancerGene
WRN	Autosomal_Recessive,BER,CGC_genes,HR
WRNIP1	DDD_genes
WT1	ACMG,Autosomal_Dominant,CGC_genes,Tumor_Suppressor
WWTR1	CGC_genes,Other_CancerGene
XAB2	NER
XBP1	Tarpey_drivers
XPA	Autosomal_Recessive,CGC_genes,NER_core,NER
XPC	Autosomal_Recessive,CGC_genes,NER_core,NER
XPO1	CGC_genes,Other_CancerGene
XPO7	DDD_genes
XRCC1	BER
XRCC2	HR_core,FA,HR,Other_CancerGene
XRCC3	HR_core,HR
XRCC4	NHEJ_core,NHEJ
XRCC5	NHEJ_core,NHEJ
XRCC6	NHEJ_core,NHEJ
YWHAB	Other
YWHAE	CGC_genes,Other_CancerGene,Other
YWHAG	DDD_genes,Other
ZBTB16	CGC_genes,Tumor_Suppressor
ZBTB47	DDD_genes
ZC4H2	DDD_genes
ZCCHC8	CGC_genes
ZEB1	CGC_genes
ZEB2	DDD_genes
ZFHX3	CGC_genes
ZFP36L1	Tarpey_drivers
ZFP64	DDD_genes
ZMYM2	CGC_genes,Other_CancerGene
ZMYM3	CGC_genes
ZMYND11	DDD_genes
ZNF148	DDD_genes
ZNF292	DDD_genes
ZNF331	CGC_genes,Other_CancerGene
ZNF384	CGC_genes,Other_CancerGene
ZNF429	CGC_genes
ZNF479	CGC_genes
ZNF521	CGC_genes,Other_CancerGene
ZNF750	DDD_genes
ZNRF3	CGC_genes
ZRSR2	CGC_genes,Other_CancerGene
ZSWIM7	HR
ZSWIM8	DDD_genes
ZYG11B	DDD_genes

## Sheet: Supplementary Table 4
Hugo_Symbol	NCBI_Build	Chromosome	Start_Position	End_Position	Strand	Variant_Classification	Variant_Type	Reference_Allele	Tumor_Seq_Allele1	Tumor_Seq_Allele2	dbSNP_RS	SampleID	Matched_Norm_Sample_Barcode	Match_Norm_Seq_Allele1	Match_Norm_Seq_Allele2	Transcript_ID	Exon_Number	t_depth	t_ref_count	t_alt_count	all_effects	Allele	Gene	Feature	Feature_type	Consequence	cDNA_position	CDS_position	Protein_position	Amino_acids	Codons	Existing_variation	ALLELE_NUM	DISTANCE	STRAND_VEP	SYMBOL	SYMBOL_SOURCE	HGNC_ID	BIOTYPE	CANONICAL	CCDS	ENSP	SWISSPROT	TREMBL	UNIPARC	EXON	INTRON	DOMAINS	IMPACT
A1CF	Mmul_10	9	87137087	87137088	+	Frame_Shift_Ins	INS	-	A	A	novel	25329	NORMAL	-	-	ENSMMUT00000009879	1/12	21	0	21	A1CF,frameshift_variant,,ENSMMUT00000009879,;A1CF,intron_variant,,ENSMMUT00000009880,;A1CF,intron_variant,,ENSMMUT00000091252,;	A	ENSMMUG00000007077	ENSMMUT00000009879	Transcript	frameshift_variant	69-70	69-70	23-24	-/X	-/A				1	A1CF	VGNC		protein_coding	YES		ENSMMUP00000009274		F7ESJ2.55	UPI001234A39E	1/12		Gene3D:3.30.70.330	HIGH
A1CF	Mmul_10	9	87137087	87137088	+	Frame_Shift_Ins	INS	-	-	A	novel	17573	NORMAL	-	-	ENSMMUT00000009879	1/12	29	14	15	A1CF,frameshift_variant,,ENSMMUT00000009879,;A1CF,intron_variant,,ENSMMUT00000009880,;A1CF,intron_variant,,ENSMMUT00000091252,;	A	ENSMMUG00000007077	ENSMMUT00000009879	Transcript	frameshift_variant	69-70	69-70	23-24	-/X	-/A				1	A1CF	VGNC		protein_coding	YES		ENSMMUP00000009274		F7ESJ2.55	UPI001234A39E	1/12		Gene3D:3.30.70.330	HIGH
A1CF	Mmul_10	9	87137087	87137088	+	Frame_Shift_Ins	INS	-	-	A	novel	17968	NORMAL	-	-	ENSMMUT00000009879	1/12	33	19	14	A1CF,frameshift_variant,,ENSMMUT00000009879,;A1CF,intron_variant,,ENSMMUT00000009880,;A1CF,intron_variant,,ENSMMUT00000091252,;	A	ENSMMUG00000007077	ENSMMUT00000009879	Transcript	frameshift_variant	69-70	69-70	23-24	-/X	-/A				1	A1CF	VGNC		protein_coding	YES		ENSMMUP00000009274		F7ESJ2.55	UPI001234A39E	1/12		Gene3D:3.30.70.330	HIGH
A1CF	Mmul_10	9	87137087	87137088	+	Frame_Shift_Ins	INS	-	-	A	novel	18111	NORMAL	-	-	ENSMMUT00000009879	1/12	18	8	10	A1CF,frameshift_variant,,ENSMMUT00000009879,;A1CF,intron_variant,,ENSMMUT00000009880,;A1CF,intron_variant,,ENSMMUT00000091252,;	A	ENSMMUG00000007077	ENSMMUT00000009879	Transcript	frameshift_variant	69-70	69-70	23-24	-/X	-/A				1	A1CF	VGNC		protein_coding	YES		ENSMMUP00000009274		F7ESJ2.55	UPI001234A39E	1/12		Gene3D:3.30.70.330	HIGH
A1CF	Mmul_10	9	87137087	87137088	+	Frame_Shift_Ins	INS	-	-	A	novel	18129	NORMAL	-	-	ENSMMUT00000009879	1/12	29	17	12	A1CF,frameshift_variant,,ENSMMUT00000009879,;A1CF,intron_variant,,ENSMMUT00000009880,;A1CF,intron_variant,,ENSMMUT00000091252,;	A	ENSMMUG00000007077	ENSMMUT00000009879	Transcript	frameshift_variant	69-70	69-70	23-24	-/X	-/A				1	A1CF	VGNC		protein_coding	YES		ENSMMUP00000009274		F7ESJ2.55	UPI001234A39E	1/12		Gene3D:3.30.70.330	HIGH
A1CF	Mmul_10	9	87137087	87137088	+	Frame_Shift_Ins	INS	-	-	A	novel	18167	NORMAL	-	-	ENSMMUT00000009879	1/12	27	11	16	A1CF,frameshift_variant,,ENSMMUT00000009879,;A1CF,intron_variant,,ENSMMUT00000009880,;A1CF,intron_variant,,ENSMMUT00000091252,;	A	ENSMMUG00000007077	ENSMMUT00000009879	Transcript	frameshift_variant	69-70	69-70	23-24	-/X	-/A				1	A1CF	VGNC		protein_coding	YES		ENSMMUP00000009274		F7ESJ2.55	UPI001234A39E	1/12		Gene3D:3.30.70.330	HIGH
A1CF	Mmul_10	9	87137087	87137088	+	Frame_Shift_Ins	INS	-	-	A	novel	18607	NORMAL	-	-	ENSMMUT00000009879	1/12	24	10	14	A1CF,frameshift_variant,,ENSMMUT00000009879,;A1CF,intron_variant,,ENSMMUT00000009880,;A1CF,intron_variant,,ENSMMUT00000091252,;	A	ENSMMUG00000007077	ENSMMUT00000009879	Transcript	frameshift_variant	69-70	69-70	23-24	-/X	-/A				1	A1CF	VGNC		protein_coding	YES		ENSMMUP00000009274		F7ESJ2.55	UPI001234A39E	1/12		Gene3D:3.30.70.330	HIGH
A1CF	Mmul_10	9	87137087	87137088	+	Frame_Shift_Ins	INS	-	-	A	novel	21847	NORMAL	-	-	ENSMMUT00000009879	1/12	20	11	9	A1CF,frameshift_variant,,ENSMMUT00000009879,;A1CF,intron_variant,,ENSMMUT00000009880,;A1CF,intron_variant,,ENSMMUT00000091252,;	A	ENSMMUG00000007077	ENSMMUT00000009879	Transcript	frameshift_variant	69-70	69-70	23-24	-/X	-/A				1	A1CF	VGNC		protein_coding	YES		ENSMMUP00000009274		F7ESJ2.55	UPI001234A39E	1/12		Gene3D:3.30.70.330	HIGH
A1CF	Mmul_10	9	87137087	87137088	+	Frame_Shift_Ins	INS	-	-	A	novel	22256	NORMAL	-	-	ENSMMUT00000009879	1/12	23	10	13	A1CF,frameshift_variant,,ENSMMUT00000009879,;A1CF,intron_variant,,ENSMMUT00000009880,;A1CF,intron_variant,,ENSMMUT00000091252,;	A	ENSMMUG00000007077	ENSMMUT00000009879	Transcript	frameshift_variant	69-70	69-70	23-24	-/X	-/A				1	A1CF	VGNC		protein_coding	YES		ENSMMUP00000009274		F7ESJ2.55	UPI001234A39E	1/12		Gene3D:3.30.70.330	HIGH
A1CF	Mmul_10	9	87137087	87137088	+	Frame_Shift_Ins	INS	-	-	A	novel	23665	NORMAL	-	-	ENSMMUT00000009879	1/12	21	8	13	A1CF,frameshift_variant,,ENSMMUT00000009879,;A1CF,intron_variant,,ENSMMUT00000009880,;A1CF,intron_variant,,ENSMMUT00000091252,;	A	ENSMMUG00000007077	ENSMMUT00000009879	Transcript	frameshift_variant	69-70	69-70	23-24	-/X	-/A				1	A1CF	VGNC		protein_coding	YES		ENSMMUP00000009274		F7ESJ2.55	UPI001234A39E	1/12		Gene3D:3.30.70.330	HIGH
A1CF	Mmul_10	9	87137087	87137088	+	Frame_Shift_Ins	INS	-	-	A	novel	25891	NORMAL	-	-	ENSMMUT00000009879	1/12	18	11	7	A1CF,frameshift_variant,,ENSMMUT00000009879,;A1CF,intron_variant,,ENSMMUT00000009880,;A1CF,intron_variant,,ENSMMUT00000091252,;	A	ENSMMUG00000007077	ENSMMUT00000009879	Transcript	frameshift_variant	69-70	69-70	23-24	-/X	-/A				1	A1CF	VGNC		protein_coding	YES		ENSMMUP00000009274		F7ESJ2.55	UPI001234A39E	1/12		Gene3D:3.30.70.330	HIGH
A1CF	Mmul_10	9	87137087	87137088	+	Frame_Shift_Ins	INS	-	-	A	novel	27521	NORMAL	-	-	ENSMMUT00000009879	1/12	22	9	13	A1CF,frameshift_variant,,ENSMMUT00000009879,;A1CF,intron_variant,,ENSMMUT00000009880,;A1CF,intron_variant,,ENSMMUT00000091252,;	A	ENSMMUG00000007077	ENSMMUT00000009879	Transcript	frameshift_variant	69-70	69-70	23-24	-/X	-/A				1	A1CF	VGNC		protein_coding	YES		ENSMMUP00000009274		F7ESJ2.55	UPI001234A39E	1/12		Gene3D:3.30.70.330	HIGH
ABCA4	Mmul_10	1	130063084	130063084	+	Missense_Mutation	SNP	G	G	A	novel	23001	NORMAL	G	G	ENSMMUT00000019452	5/50	24	15	9	ABCA4,missense_variant,,ENSMMUT00000019452,;	A	ENSMMUG00000013858	ENSMMUT00000019452	Transcript	missense_variant	455	455	152	R/Q	cGg/cAg				1	ABCA4	VGNC		protein_coding	YES		ENSMMUP00000018214		F6RLM8.57	UPI001237046C	5/50		Low_complexity_(Seg):seg,PANTHER:PTHR19229,PANTHER:PTHR19229:SF190,TIGRFAM:TIGR01257	MODERATE
ACKR3	Mmul_10	12	123979040	123979040	+	Missense_Mutation	SNP	G	G	A	novel	27151	NORMAL	G	G	ENSMMUT00000083317	3/3	24	10	14	ACKR3,missense_variant,,ENSMMUT00000083317,;ACKR3,missense_variant,,ENSMMUT00000107472,;	A	ENSMMUG00000060487	ENSMMUT00000083317	Transcript	missense_variant	792	565	189	V/I	Gtc/Atc				1	ACKR3	EntrezGene		protein_coding	YES		ENSMMUP00000068645		A0A5F7ZVH9.7	UPI0005F54572	3/3		Gene3D:1.20.1070.10,Pfam:PF00001,Prints:PR00237,PROSITE_profiles:PS50262,PANTHER:PTHR10489,PANTHER:PTHR10489:SF931,Superfamily:SSF81321,Transmembrane_helices:TMhelix,CDD:cd14987,Low_complexity_(Seg):seg	MODERATE
ACSL3	Mmul_10	12	110394784	110394784	+	Missense_Mutation	SNP	C	C	G	novel	18087	NORMAL	C	C	ENSMMUT00000090991	17/17	27	14	13	ACSL3,missense_variant,,ENSMMUT00000007589,;ACSL3,missense_variant,,ENSMMUT00000090991,;ACSL3,missense_variant,,ENSMMUT00000097244,;	G	ENSMMUG00000005393	ENSMMUT00000090991	Transcript	missense_variant	2545	2128	710	Q/E	Cag/Gag				1	ACSL3	VGNC		protein_coding	YES		ENSMMUP00000076488		F7GUH7.59	UPI00006D134D	17/17		PANTHER:PTHR43272,PANTHER:PTHR43272:SF13,Superfamily:SSF56801	MODERATE
ADAMTS12	Mmul_10	6	33710304	33710304	+	Missense_Mutation	SNP	T	T	C	novel	25891	NORMAL	T	T	ENSMMUT00000062084	18/24	30	13	17	ADAMTS12,missense_variant,,ENSMMUT00000062084,;	C	ENSMMUG00000016226	ENSMMUT00000062084	Transcript	missense_variant	2860	2860	954	S/G	Agt/Ggt				-1	ADAMTS12	VGNC		protein_coding	YES		ENSMMUP00000060924		A0A1D5RKT0.32	UPI0010A231C1	18/24		Gene3D:2.20.100.10,Pfam:PF19030,PROSITE_profiles:PS50092,PANTHER:PTHR13723,PANTHER:PTHR13723:SF189,SMART:SM00209,Superfamily:SSF82895	MODERATE
ADAMTS12	Mmul_10	6	33745846	33745846	+	Frame_Shift_Del	DEL	T	T	-	novel	18201	NORMAL	T	T	ENSMMUT00000062084	14/24	31	16	15	ADAMTS12,frameshift_variant,,ENSMMUT00000062084,;	-	ENSMMUG00000016226	ENSMMUT00000062084	Transcript	frameshift_variant	2129	2129	710	Q/X	cAg/cg				-1	ADAMTS12	VGNC		protein_coding	YES		ENSMMUP00000060924		A0A1D5RKT0.32	UPI0010A231C1	14/24		Gene3D:2.60.120.830,Pfam:PF05986,PANTHER:PTHR13723,PANTHER:PTHR13723:SF189	HIGH
ADAMTS12	Mmul_10	6	33745846	33745846	+	Frame_Shift_Del	DEL	T	T	-	novel	18210	NORMAL	T	T	ENSMMUT00000062084	14/24	32	15	17	ADAMTS12,frameshift_variant,,ENSMMUT00000062084,;	-	ENSMMUG00000016226	ENSMMUT00000062084	Transcript	frameshift_variant	2129	2129	710	Q/X	cAg/cg				-1	ADAMTS12	VGNC		protein_coding	YES		ENSMMUP00000060924		A0A1D5RKT0.32	UPI0010A231C1	14/24		Gene3D:2.60.120.830,Pfam:PF05986,PANTHER:PTHR13723,PANTHER:PTHR13723:SF189	HIGH
ADAMTS12	Mmul_10	6	33745891	33745891	+	Missense_Mutation	SNP	A	A	T	rs290949274	17943	NORMAL	A	A	ENSMMUT00000062084	14/24	27	15	12	ADAMTS12,missense_variant,,ENSMMUT00000062084,;	T	ENSMMUG00000016226	ENSMMUT00000062084	Transcript	missense_variant	2084	2084	695	L/Q	cTg/cAg	rs290949274			-1	ADAMTS12	VGNC		protein_coding	YES		ENSMMUP00000060924		A0A1D5RKT0.32	UPI0010A231C1	14/24		Gene3D:2.60.120.830,Prints:PR01857,PANTHER:PTHR13723,PANTHER:PTHR13723:SF189	MODERATE
ADAMTS12	Mmul_10	6	33760729	33760729	+	Missense_Mutation	SNP	G	G	C	rs284414398	18111	NORMAL	G	G	ENSMMUT00000062084	12/24	24	13	11	ADAMTS12,missense_variant,,ENSMMUT00000062084,;	C	ENSMMUG00000016226	ENSMMUT00000062084	Transcript	missense_variant	1885	1885	629	P/A	Cca/Gca	rs284414398			-1	ADAMTS12	VGNC		protein_coding	YES		ENSMMUP00000060924		A0A1D5RKT0.32	UPI0010A231C1	12/24		PANTHER:PTHR13723,PANTHER:PTHR13723:SF189	MODERATE
ADAMTS12	Mmul_10	6	33760729	33760729	+	Missense_Mutation	SNP	G	G	C	rs284414398	25329	NORMAL	G	G	ENSMMUT00000062084	12/24	18	11	7	ADAMTS12,missense_variant,,ENSMMUT00000062084,;	C	ENSMMUG00000016226	ENSMMUT00000062084	Transcript	missense_variant	1885	1885	629	P/A	Cca/Gca	rs284414398			-1	ADAMTS12	VGNC		protein_coding	YES		ENSMMUP00000060924		A0A1D5RKT0.32	UPI0010A231C1	12/24		PANTHER:PTHR13723,PANTHER:PTHR13723:SF189	MODERATE
ADAMTS12	Mmul_10	6	33760771	33760771	+	Missense_Mutation	SNP	G	G	A	novel	17573	NORMAL	G	G	ENSMMUT00000062084	12/24	24	17	7	ADAMTS12,missense_variant,,ENSMMUT00000062084,;	A	ENSMMUG00000016226	ENSMMUT00000062084	Transcript	missense_variant	1843	1843	615	P/S	Ccc/Tcc				-1	ADAMTS12	VGNC		protein_coding	YES		ENSMMUP00000060924		A0A1D5RKT0.32	UPI0010A231C1	12/24		PANTHER:PTHR13723,PANTHER:PTHR13723:SF189	MODERATE
ADAMTS12	Mmul_10	6	33760771	33760771	+	Missense_Mutation	SNP	G	G	A	novel	17943	NORMAL	G	G	ENSMMUT00000062084	12/24	29	14	15	ADAMTS12,missense_variant,,ENSMMUT00000062084,;	A	ENSMMUG00000016226	ENSMMUT00000062084	Transcript	missense_variant	1843	1843	615	P/S	Ccc/Tcc				-1	ADAMTS12	VGNC		protein_coding	YES		ENSMMUP00000060924		A0A1D5RKT0.32	UPI0010A231C1	12/24		PANTHER:PTHR13723,PANTHER:PTHR13723:SF189	MODERATE
ADAMTS12	Mmul_10	6	33878507	33878507	+	Missense_Mutation	SNP	T	T	G	rs299118825	17943	NORMAL	T	T	ENSMMUT00000062084	3/24	27	17	10	ADAMTS12,missense_variant,,ENSMMUT00000062084,;	G	ENSMMUG00000016226	ENSMMUT00000062084	Transcript	missense_variant	630	630	210	L/F	ttA/ttC	rs299118825			-1	ADAMTS12	VGNC		protein_coding	YES		ENSMMUP00000060924		A0A1D5RKT0.32	UPI0010A231C1	3/24		PANTHER:PTHR13723,PANTHER:PTHR13723:SF189	MODERATE
AFDN	Mmul_10	4	2694458	2694458	+	Missense_Mutation	SNP	G	G	A	novel	18133	NORMAL	G	G	ENSMMUT00000029596	31/33	21	9	12	AFDN,missense_variant,,ENSMMUT00000029596,;AFDN,intron_variant,,ENSMMUT00000029594,;AFDN,intron_variant,,ENSMMUT00000029595,;	A	ENSMMUG00000021044	ENSMMUT00000029596	Transcript	missense_variant	5306	5306	1769	P/L	cCg/cTg				-1	AFDN	VGNC		protein_coding	YES		ENSMMUP00000027697		F7HG05.64	UPI0012360EC8	31/33		PANTHER:PTHR10398,PANTHER:PTHR10398:SF2,MobiDB_lite:mobidb-lite,Low_complexity_(Seg):seg	MODERATE
AFDN	Mmul_10	4	2694563	2694565	+	In_Frame_Del	DEL	TCC	TCC	-	novel	18008	NORMAL	TCC	TCC	ENSMMUT00000029596	31/33	21	18	3	AFDN,inframe_deletion,,ENSMMUT00000029594,;AFDN,inframe_deletion,,ENSMMUT00000029595,;AFDN,inframe_deletion,,ENSMMUT00000029596,;	-	ENSMMUG00000021044	ENSMMUT00000029596	Transcript	inframe_deletion	5199-5201	5199-5201	1733-1734	ED/D	gaGGAc/gac				-1	AFDN	VGNC		protein_coding	YES		ENSMMUP00000027697		F7HG05.64	UPI0012360EC8	31/33		PANTHER:PTHR10398,PANTHER:PTHR10398:SF2,MobiDB_lite:mobidb-lite	MODERATE
AFDN	Mmul_10	4	2694563	2694565	+	In_Frame_Del	DEL	TCC	TCC	-	novel	23001	NORMAL	TCC	TCC	ENSMMUT00000029596	31/33	13	11	2	AFDN,inframe_deletion,,ENSMMUT00000029594,;AFDN,inframe_deletion,,ENSMMUT00000029595,;AFDN,inframe_deletion,,ENSMMUT00000029596,;	-	ENSMMUG00000021044	ENSMMUT00000029596	Transcript	inframe_deletion	5199-5201	5199-5201	1733-1734	ED/D	gaGGAc/gac				-1	AFDN	VGNC		protein_coding	YES		ENSMMUP00000027697		F7HG05.64	UPI0012360EC8	31/33		PANTHER:PTHR10398,PANTHER:PTHR10398:SF2,MobiDB_lite:mobidb-lite	MODERATE
AFDN	Mmul_10	4	2747984	2747984	+	Missense_Mutation	SNP	G	G	A	rs196717771	18129	NORMAL	G	G	ENSMMUT00000029596	14/33	21	13	8	AFDN,missense_variant,,ENSMMUT00000029594,;AFDN,missense_variant,,ENSMMUT00000029595,;AFDN,missense_variant,,ENSMMUT00000029596,;	A	ENSMMUG00000021044	ENSMMUT00000029596	Transcript	missense_variant	1912	1912	638	P/S	Cct/Tct	rs196717771			-1	AFDN	VGNC		protein_coding	YES		ENSMMUP00000027697		F7HG05.64	UPI0012360EC8	14/33		PANTHER:PTHR10398,PANTHER:PTHR10398:SF2,CDD:cd15471	MODERATE
AFDN	Mmul_10	4	2752188	2752188	+	Missense_Mutation	SNP	T	T	C	novel	27151	NORMAL	T	T	ENSMMUT00000029596	12/33	32	17	15	AFDN,missense_variant,,ENSMMUT00000029594,;AFDN,missense_variant,,ENSMMUT00000029595,;AFDN,missense_variant,,ENSMMUT00000029596,;	C	ENSMMUG00000021044	ENSMMUT00000029596	Transcript	missense_variant	1627	1627	543	S/G	Agc/Ggc				-1	AFDN	VGNC		protein_coding	YES		ENSMMUP00000027697		F7HG05.64	UPI0012360EC8	12/33		PANTHER:PTHR10398,PANTHER:PTHR10398:SF2,MobiDB_lite:mobidb-lite,MobiDB_lite:mobidb-lite	MODERATE
AFF1	Mmul_10	5	85438886	85438886	+	Missense_Mutation	SNP	A	A	G	rs1085254955	21847	NORMAL	A	A	ENSMMUT00000019764	3/20	28	12	16	AFF1,missense_variant,,ENSMMUT00000019764,;AFF1,missense_variant,,ENSMMUT00000055715,;AFF1,missense_variant,,ENSMMUT00000075221,;AFF1,missense_variant,,ENSMMUT00000075895,;	G	ENSMMUG00000014076	ENSMMUT00000019764	Transcript	missense_variant	245	209	70	N/S	aAc/aGc	rs1085254955			1	AFF1	VGNC		protein_coding	YES		ENSMMUP00000018502		F7CE41.48	UPI0000D9B15E	3/20		Pfam:PF05110,PANTHER:PTHR10528,PANTHER:PTHR10528:SF6	MODERATE
AFF1	Mmul_10	5	85438886	85438886	+	Missense_Mutation	SNP	A	A	G	rs1085254955	22256	NORMAL	A	A	ENSMMUT00000019764	3/20	30	18	12	AFF1,missense_variant,,ENSMMUT00000019764,;AFF1,missense_variant,,ENSMMUT00000055715,;AFF1,missense_variant,,ENSMMUT00000075221,;AFF1,missense_variant,,ENSMMUT00000075895,;	G	ENSMMUG00000014076	ENSMMUT00000019764	Transcript	missense_variant	245	209	70	N/S	aAc/aGc	rs1085254955			1	AFF1	VGNC		protein_coding	YES		ENSMMUP00000018502		F7CE41.48	UPI0000D9B15E	3/20		Pfam:PF05110,PANTHER:PTHR10528,PANTHER:PTHR10528:SF6	MODERATE
AFF1	Mmul_10	5	85438886	85438886	+	Missense_Mutation	SNP	A	A	G	rs1085254955	22523	NORMAL	A	A	ENSMMUT00000019764	3/20	14	8	6	AFF1,missense_variant,,ENSMMUT00000019764,;AFF1,missense_variant,,ENSMMUT00000055715,;AFF1,missense_variant,,ENSMMUT00000075221,;AFF1,missense_variant,,ENSMMUT00000075895,;	G	ENSMMUG00000014076	ENSMMUT00000019764	Transcript	missense_variant	245	209	70	N/S	aAc/aGc	rs1085254955			1	AFF1	VGNC		protein_coding	YES		ENSMMUP00000018502		F7CE41.48	UPI0000D9B15E	3/20		Pfam:PF05110,PANTHER:PTHR10528,PANTHER:PTHR10528:SF6	MODERATE
AFF1	Mmul_10	5	85438886	85438886	+	Missense_Mutation	SNP	A	A	G	rs1085254955	27516	NORMAL	A	A	ENSMMUT00000019764	3/20	17	10	7	AFF1,missense_variant,,ENSMMUT00000019764,;AFF1,missense_variant,,ENSMMUT00000055715,;AFF1,missense_variant,,ENSMMUT00000075221,;AFF1,missense_variant,,ENSMMUT00000075895,;	G	ENSMMUG00000014076	ENSMMUT00000019764	Transcript	missense_variant	245	209	70	N/S	aAc/aGc	rs1085254955			1	AFF1	VGNC		protein_coding	YES		ENSMMUP00000018502		F7CE41.48	UPI0000D9B15E	3/20		Pfam:PF05110,PANTHER:PTHR10528,PANTHER:PTHR10528:SF6	MODERATE
AFF1	Mmul_10	5	85438886	85438886	+	Missense_Mutation	SNP	A	A	G	rs1085254955	30186	NORMAL	A	A	ENSMMUT00000019764	3/20	28	15	13	AFF1,missense_variant,,ENSMMUT00000019764,;AFF1,missense_variant,,ENSMMUT00000055715,;AFF1,missense_variant,,ENSMMUT00000075221,;AFF1,missense_variant,,ENSMMUT00000075895,;	G	ENSMMUG00000014076	ENSMMUT00000019764	Transcript	missense_variant	245	209	70	N/S	aAc/aGc	rs1085254955			1	AFF1	VGNC		protein_coding	YES		ENSMMUP00000018502		F7CE41.48	UPI0000D9B15E	3/20		Pfam:PF05110,PANTHER:PTHR10528,PANTHER:PTHR10528:SF6	MODERATE
AKT1	Mmul_10	7	167097515	167097515	+	Missense_Mutation	SNP	G	G	T	novel	30325	NORMAL	G	G	ENSMMUT00000095927	8/13	14	12	2	AKT1,missense_variant,,ENSMMUT00000001488,;AKT1,missense_variant,,ENSMMUT00000039437,;AKT1,missense_variant,,ENSMMUT00000073465,;AKT1,missense_variant,,ENSMMUT00000095927,;	T	ENSMMUG00000001044	ENSMMUT00000095927	Transcript	missense_variant	840	781	261	L/M	Ctg/Atg				-1	AKT1	VGNC		protein_coding	YES		ENSMMUP00000061388		G7MWI7.7,A0A5F7Z7J5.5	UPI00006D3D79	8/13		PROSITE_profiles:PS50011,CDD:cd05594,PANTHER:PTHR24351,PANTHER:PTHR24351:SF200,Pfam:PF00069,Gene3D:1.10.510.10,Gene3D:3.30.200.20,SMART:SM00220,Superfamily:SSF56112	MODERATE
ALG13	Mmul_10	X	108441384	108441385	+	In_Frame_Ins	INS	-	-	ACC	novel	17745	NORMAL	-	-	ENSMMUT00000089126	24/27	9	6	3	ALG13,inframe_insertion,,ENSMMUT00000014587,;ALG13,inframe_insertion,,ENSMMUT00000089126,;	ACC	ENSMMUG00000010421	ENSMMUT00000089126	Transcript	inframe_insertion	2756-2757	2756-2757	919	L/LP	cta/ctACCa				1	ALG13	VGNC		protein_coding	YES		ENSMMUP00000080419		A0A5F8ASN1.6	UPI0003AB8674	24/27			MODERATE
ALG13	Mmul_10	X	108441384	108441385	+	In_Frame_Ins	INS	-	-	ACC	novel	17943	NORMAL	-	-	ENSMMUT00000089126	24/27	10	5	5	ALG13,inframe_insertion,,ENSMMUT00000014587,;ALG13,inframe_insertion,,ENSMMUT00000089126,;	ACC	ENSMMUG00000010421	ENSMMUT00000089126	Transcript	inframe_insertion	2756-2757	2756-2757	919	L/LP	cta/ctACCa				1	ALG13	VGNC		protein_coding	YES		ENSMMUP00000080419		A0A5F8ASN1.6	UPI0003AB8674	24/27			MODERATE
ALG13	Mmul_10	X	108441384	108441385	+	In_Frame_Ins	INS	-	-	ACC	novel	18090	NORMAL	-	-	ENSMMUT00000089126	24/27	7	4	3	ALG13,inframe_insertion,,ENSMMUT00000014587,;ALG13,inframe_insertion,,ENSMMUT00000089126,;	ACC	ENSMMUG00000010421	ENSMMUT00000089126	Transcript	inframe_insertion	2756-2757	2756-2757	919	L/LP	cta/ctACCa				1	ALG13	VGNC		protein_coding	YES		ENSMMUP00000080419		A0A5F8ASN1.6	UPI0003AB8674	24/27			MODERATE
ALG13	Mmul_10	X	108441384	108441385	+	In_Frame_Ins	INS	-	-	ACC	novel	18133	NORMAL	-	-	ENSMMUT00000089126	24/27	7	3	4	ALG13,inframe_insertion,,ENSMMUT00000014587,;ALG13,inframe_insertion,,ENSMMUT00000089126,;	ACC	ENSMMUG00000010421	ENSMMUT00000089126	Transcript	inframe_insertion	2756-2757	2756-2757	919	L/LP	cta/ctACCa				1	ALG13	VGNC		protein_coding	YES		ENSMMUP00000080419		A0A5F8ASN1.6	UPI0003AB8674	24/27			MODERATE
ALG13	Mmul_10	X	108441384	108441385	+	In_Frame_Ins	INS	-	-	ACC	novel	18201	NORMAL	-	-	ENSMMUT00000089126	24/27	12	6	6	ALG13,inframe_insertion,,ENSMMUT00000014587,;ALG13,inframe_insertion,,ENSMMUT00000089126,;	ACC	ENSMMUG00000010421	ENSMMUT00000089126	Transcript	inframe_insertion	2756-2757	2756-2757	919	L/LP	cta/ctACCa				1	ALG13	VGNC		protein_coding	YES		ENSMMUP00000080419		A0A5F8ASN1.6	UPI0003AB8674	24/27			MODERATE
ALG13	Mmul_10	X	108441384	108441385	+	In_Frame_Ins	INS	-	-	ACC	novel	18205	NORMAL	-	-	ENSMMUT00000089126	24/27	9	6	3	ALG13,inframe_insertion,,ENSMMUT00000014587,;ALG13,inframe_insertion,,ENSMMUT00000089126,;	ACC	ENSMMUG00000010421	ENSMMUT00000089126	Transcript	inframe_insertion	2756-2757	2756-2757	919	L/LP	cta/ctACCa				1	ALG13	VGNC		protein_coding	YES		ENSMMUP00000080419		A0A5F8ASN1.6	UPI0003AB8674	24/27			MODERATE
ALG13	Mmul_10	X	108441384	108441385	+	In_Frame_Ins	INS	-	-	ACC	novel	26661	NORMAL	-	-	ENSMMUT00000089126	24/27	11	3	8	ALG13,inframe_insertion,,ENSMMUT00000014587,;ALG13,inframe_insertion,,ENSMMUT00000089126,;	ACC	ENSMMUG00000010421	ENSMMUT00000089126	Transcript	inframe_insertion	2756-2757	2756-2757	919	L/LP	cta/ctACCa				1	ALG13	VGNC		protein_coding	YES		ENSMMUP00000080419		A0A5F8ASN1.6	UPI0003AB8674	24/27			MODERATE
ALK	Mmul_10	13	78996181	78996181	+	Missense_Mutation	SNP	C	C	A	novel	17694	NORMAL	C	C	ENSMMUT00000014350	1/29	29	19	10	ALK,missense_variant,,ENSMMUT00000014350,;	A	ENSMMUG00000010265	ENSMMUT00000014350	Transcript	missense_variant	290	290	97	P/Q	cCg/cAg				1	ALK	VGNC		protein_coding	YES		ENSMMUP00000013440		F6PVR5.65	UPI0010A2012A	1/29		Low_complexity_(Seg):seg	MODERATE
ALK	Mmul_10	13	79608325	79608325	+	Missense_Mutation	SNP	G	G	C	rs290686705	17857	NORMAL	G	G	ENSMMUT00000014350	6/29	26	15	11	ALK,missense_variant,,ENSMMUT00000014350,;	C	ENSMMUG00000010265	ENSMMUT00000014350	Transcript	missense_variant	1403	1403	468	S/T	aGc/aCc	rs290686705			1	ALK	VGNC		protein_coding	YES		ENSMMUP00000013440		F6PVR5.65	UPI0010A2012A	6/29		Gene3D:4.10.400.10,SMART:SM00192,Superfamily:SSF57424	MODERATE
ALK	Mmul_10	13	79608325	79608325	+	Missense_Mutation	SNP	G	G	C	rs290686705	17893	NORMAL	G	G	ENSMMUT00000014350	6/29	36	17	19	ALK,missense_variant,,ENSMMUT00000014350,;	C	ENSMMUG00000010265	ENSMMUT00000014350	Transcript	missense_variant	1403	1403	468	S/T	aGc/aCc	rs290686705			1	ALK	VGNC		protein_coding	YES		ENSMMUP00000013440		F6PVR5.65	UPI0010A2012A	6/29		Gene3D:4.10.400.10,SMART:SM00192,Superfamily:SSF57424	MODERATE
ALK	Mmul_10	13	79608325	79608325	+	Missense_Mutation	SNP	G	G	C	rs290686705	17944	NORMAL	G	G	ENSMMUT00000014350	6/29	34	15	19	ALK,missense_variant,,ENSMMUT00000014350,;	C	ENSMMUG00000010265	ENSMMUT00000014350	Transcript	missense_variant	1403	1403	468	S/T	aGc/aCc	rs290686705			1	ALK	VGNC		protein_coding	YES		ENSMMUP00000013440		F6PVR5.65	UPI0010A2012A	6/29		Gene3D:4.10.400.10,SMART:SM00192,Superfamily:SSF57424	MODERATE
ALK	Mmul_10	13	79608325	79608325	+	Missense_Mutation	SNP	G	G	C	rs290686705	18008	NORMAL	G	G	ENSMMUT00000014350	6/29	35	20	15	ALK,missense_variant,,ENSMMUT00000014350,;	C	ENSMMUG00000010265	ENSMMUT00000014350	Transcript	missense_variant	1403	1403	468	S/T	aGc/aCc	rs290686705			1	ALK	VGNC		protein_coding	YES		ENSMMUP00000013440		F6PVR5.65	UPI0010A2012A	6/29		Gene3D:4.10.400.10,SMART:SM00192,Superfamily:SSF57424	MODERATE
ALK	Mmul_10	13	79608325	79608325	+	Missense_Mutation	SNP	G	G	C	rs290686705	18100	NORMAL	G	G	ENSMMUT00000014350	6/29	33	18	15	ALK,missense_variant,,ENSMMUT00000014350,;	C	ENSMMUG00000010265	ENSMMUT00000014350	Transcript	missense_variant	1403	1403	468	S/T	aGc/aCc	rs290686705			1	ALK	VGNC		protein_coding	YES		ENSMMUP00000013440		F6PVR5.65	UPI0010A2012A	6/29		Gene3D:4.10.400.10,SMART:SM00192,Superfamily:SSF57424	MODERATE
ALK	Mmul_10	13	79608325	79608325	+	Missense_Mutation	SNP	G	G	C	rs290686705	18105	NORMAL	G	G	ENSMMUT00000014350	6/29	16	3	13	ALK,missense_variant,,ENSMMUT00000014350,;	C	ENSMMUG00000010265	ENSMMUT00000014350	Transcript	missense_variant	1403	1403	468	S/T	aGc/aCc	rs290686705			1	ALK	VGNC		protein_coding	YES		ENSMMUP00000013440		F6PVR5.65	UPI0010A2012A	6/29		Gene3D:4.10.400.10,SMART:SM00192,Superfamily:SSF57424	MODERATE
ALK	Mmul_10	13	79608325	79608325	+	Missense_Mutation	SNP	G	G	C	rs290686705	18112	NORMAL	G	G	ENSMMUT00000014350	6/29	33	13	20	ALK,missense_variant,,ENSMMUT00000014350,;	C	ENSMMUG00000010265	ENSMMUT00000014350	Transcript	missense_variant	1403	1403	468	S/T	aGc/aCc	rs290686705			1	ALK	VGNC		protein_coding	YES		ENSMMUP00000013440		F6PVR5.65	UPI0010A2012A	6/29		Gene3D:4.10.400.10,SMART:SM00192,Superfamily:SSF57424	MODERATE
ALK	Mmul_10	13	79608325	79608325	+	Missense_Mutation	SNP	G	G	C	rs290686705	18133	NORMAL	G	G	ENSMMUT00000014350	6/29	34	16	18	ALK,missense_variant,,ENSMMUT00000014350,;	C	ENSMMUG00000010265	ENSMMUT00000014350	Transcript	missense_variant	1403	1403	468	S/T	aGc/aCc	rs290686705			1	ALK	VGNC		protein_coding	YES		ENSMMUP00000013440		F6PVR5.65	UPI0010A2012A	6/29		Gene3D:4.10.400.10,SMART:SM00192,Superfamily:SSF57424	MODERATE
ALK	Mmul_10	13	79608325	79608325	+	Missense_Mutation	SNP	G	G	C	rs290686705	18167	NORMAL	G	G	ENSMMUT00000014350	6/29	28	17	11	ALK,missense_variant,,ENSMMUT00000014350,;	C	ENSMMUG00000010265	ENSMMUT00000014350	Transcript	missense_variant	1403	1403	468	S/T	aGc/aCc	rs290686705			1	ALK	VGNC		protein_coding	YES		ENSMMUP00000013440		F6PVR5.65	UPI0010A2012A	6/29		Gene3D:4.10.400.10,SMART:SM00192,Superfamily:SSF57424	MODERATE
ALK	Mmul_10	13	79608325	79608325	+	Missense_Mutation	SNP	G	G	C	rs290686705	27515	NORMAL	G	G	ENSMMUT00000014350	6/29	22	12	10	ALK,missense_variant,,ENSMMUT00000014350,;	C	ENSMMUG00000010265	ENSMMUT00000014350	Transcript	missense_variant	1403	1403	468	S/T	aGc/aCc	rs290686705			1	ALK	VGNC		protein_coding	YES		ENSMMUP00000013440		F6PVR5.65	UPI0010A2012A	6/29		Gene3D:4.10.400.10,SMART:SM00192,Superfamily:SSF57424	MODERATE
ALK	Mmul_10	13	79608325	79608325	+	Missense_Mutation	SNP	G	G	C	rs290686705	27536	NORMAL	G	G	ENSMMUT00000014350	6/29	39	26	13	ALK,missense_variant,,ENSMMUT00000014350,;	C	ENSMMUG00000010265	ENSMMUT00000014350	Transcript	missense_variant	1403	1403	468	S/T	aGc/aCc	rs290686705			1	ALK	VGNC		protein_coding	YES		ENSMMUP00000013440		F6PVR5.65	UPI0010A2012A	6/29		Gene3D:4.10.400.10,SMART:SM00192,Superfamily:SSF57424	MODERATE
ALK	Mmul_10	13	79608325	79608325	+	Missense_Mutation	SNP	G	G	C	rs290686705	30186	NORMAL	G	G	ENSMMUT00000014350	6/29	35	17	18	ALK,missense_variant,,ENSMMUT00000014350,;	C	ENSMMUG00000010265	ENSMMUT00000014350	Transcript	missense_variant	1403	1403	468	S/T	aGc/aCc	rs290686705			1	ALK	VGNC		protein_coding	YES		ENSMMUP00000013440		F6PVR5.65	UPI0010A2012A	6/29		Gene3D:4.10.400.10,SMART:SM00192,Superfamily:SSF57424	MODERATE
ALKBH3	Mmul_10	14	21867959	21867959	+	Missense_Mutation	SNP	T	T	C	rs301405153	17857	NORMAL	T	T	ENSMMUT00000104517	4/10	26	9	17	ALKBH3,missense_variant,,ENSMMUT00000104517,;ALKBH3,missense_variant,,ENSMMUT00000104994,;ALKBH3,intron_variant,,ENSMMUT00000024307,;	C	ENSMMUG00000017294	ENSMMUT00000104517	Transcript	missense_variant	400	209	70	Q/R	cAa/cGa	rs301405153			-1	ALKBH3	VGNC		protein_coding	YES		ENSMMUP00000069255		A0A5F7ZX83.6	UPI00006D139D	4/10		PANTHER:PTHR31212,PANTHER:PTHR31212:SF4,Gene3D:2.60.120.590	MODERATE
ALKBH3	Mmul_10	14	21867959	21867959	+	Missense_Mutation	SNP	T	T	C	rs301405153	17874	NORMAL	T	T	ENSMMUT00000104517	4/10	19	11	8	ALKBH3,missense_variant,,ENSMMUT00000104517,;ALKBH3,missense_variant,,ENSMMUT00000104994,;ALKBH3,intron_variant,,ENSMMUT00000024307,;	C	ENSMMUG00000017294	ENSMMUT00000104517	Transcript	missense_variant	400	209	70	Q/R	cAa/cGa	rs301405153			-1	ALKBH3	VGNC		protein_coding	YES		ENSMMUP00000069255		A0A5F7ZX83.6	UPI00006D139D	4/10		PANTHER:PTHR31212,PANTHER:PTHR31212:SF4,Gene3D:2.60.120.590	MODERATE
ALKBH3	Mmul_10	14	21867959	21867959	+	Missense_Mutation	SNP	T	T	C	rs301405153	17893	NORMAL	T	T	ENSMMUT00000104517	4/10	33	15	18	ALKBH3,missense_variant,,ENSMMUT00000104517,;ALKBH3,missense_variant,,ENSMMUT00000104994,;ALKBH3,intron_variant,,ENSMMUT00000024307,;	C	ENSMMUG00000017294	ENSMMUT00000104517	Transcript	missense_variant	400	209	70	Q/R	cAa/cGa	rs301405153			-1	ALKBH3	VGNC		protein_coding	YES		ENSMMUP00000069255		A0A5F7ZX83.6	UPI00006D139D	4/10		PANTHER:PTHR31212,PANTHER:PTHR31212:SF4,Gene3D:2.60.120.590	MODERATE
ALKBH3	Mmul_10	14	21867959	21867959	+	Missense_Mutation	SNP	T	T	C	rs301405153	17943	NORMAL	T	T	ENSMMUT00000104517	4/10	23	13	10	ALKBH3,missense_variant,,ENSMMUT00000104517,;ALKBH3,missense_variant,,ENSMMUT00000104994,;ALKBH3,intron_variant,,ENSMMUT00000024307,;	C	ENSMMUG00000017294	ENSMMUT00000104517	Transcript	missense_variant	400	209	70	Q/R	cAa/cGa	rs301405153			-1	ALKBH3	VGNC		protein_coding	YES		ENSMMUP00000069255		A0A5F7ZX83.6	UPI00006D139D	4/10		PANTHER:PTHR31212,PANTHER:PTHR31212:SF4,Gene3D:2.60.120.590	MODERATE
ALKBH3	Mmul_10	14	21867959	21867959	+	Missense_Mutation	SNP	T	T	C	rs301405153	17968	NORMAL	T	T	ENSMMUT00000104517	4/10	29	8	21	ALKBH3,missense_variant,,ENSMMUT00000104517,;ALKBH3,missense_variant,,ENSMMUT00000104994,;ALKBH3,intron_variant,,ENSMMUT00000024307,;	C	ENSMMUG00000017294	ENSMMUT00000104517	Transcript	missense_variant	400	209	70	Q/R	cAa/cGa	rs301405153			-1	ALKBH3	VGNC		protein_coding	YES		ENSMMUP00000069255		A0A5F7ZX83.6	UPI00006D139D	4/10		PANTHER:PTHR31212,PANTHER:PTHR31212:SF4,Gene3D:2.60.120.590	MODERATE
ALKBH3	Mmul_10	14	21867959	21867959	+	Missense_Mutation	SNP	T	T	C	rs301405153	18200	NORMAL	T	T	ENSMMUT00000104517	4/10	21	11	10	ALKBH3,missense_variant,,ENSMMUT00000104517,;ALKBH3,missense_variant,,ENSMMUT00000104994,;ALKBH3,intron_variant,,ENSMMUT00000024307,;	C	ENSMMUG00000017294	ENSMMUT00000104517	Transcript	missense_variant	400	209	70	Q/R	cAa/cGa	rs301405153			-1	ALKBH3	VGNC		protein_coding	YES		ENSMMUP00000069255		A0A5F7ZX83.6	UPI00006D139D	4/10		PANTHER:PTHR31212,PANTHER:PTHR31212:SF4,Gene3D:2.60.120.590	MODERATE
ALKBH3	Mmul_10	14	21867959	21867959	+	Missense_Mutation	SNP	T	T	C	rs301405153	18201	NORMAL	T	T	ENSMMUT00000104517	4/10	40	16	24	ALKBH3,missense_variant,,ENSMMUT00000104517,;ALKBH3,missense_variant,,ENSMMUT00000104994,;ALKBH3,intron_variant,,ENSMMUT00000024307,;	C	ENSMMUG00000017294	ENSMMUT00000104517	Transcript	missense_variant	400	209	70	Q/R	cAa/cGa	rs301405153			-1	ALKBH3	VGNC		protein_coding	YES		ENSMMUP00000069255		A0A5F7ZX83.6	UPI00006D139D	4/10		PANTHER:PTHR31212,PANTHER:PTHR31212:SF4,Gene3D:2.60.120.590	MODERATE
ALKBH3	Mmul_10	14	21867959	21867959	+	Missense_Mutation	SNP	T	T	C	rs301405153	18206	NORMAL	T	T	ENSMMUT00000104517	4/10	25	11	14	ALKBH3,missense_variant,,ENSMMUT00000104517,;ALKBH3,missense_variant,,ENSMMUT00000104994,;ALKBH3,intron_variant,,ENSMMUT00000024307,;	C	ENSMMUG00000017294	ENSMMUT00000104517	Transcript	missense_variant	400	209	70	Q/R	cAa/cGa	rs301405153			-1	ALKBH3	VGNC		protein_coding	YES		ENSMMUP00000069255		A0A5F7ZX83.6	UPI00006D139D	4/10		PANTHER:PTHR31212,PANTHER:PTHR31212:SF4,Gene3D:2.60.120.590	MODERATE
ALKBH3	Mmul_10	14	21867959	21867959	+	Missense_Mutation	SNP	T	T	C	rs301405153	18216	NORMAL	T	T	ENSMMUT00000104517	4/10	34	12	22	ALKBH3,missense_variant,,ENSMMUT00000104517,;ALKBH3,missense_variant,,ENSMMUT00000104994,;ALKBH3,intron_variant,,ENSMMUT00000024307,;	C	ENSMMUG00000017294	ENSMMUT00000104517	Transcript	missense_variant	400	209	70	Q/R	cAa/cGa	rs301405153			-1	ALKBH3	VGNC		protein_coding	YES		ENSMMUP00000069255		A0A5F7ZX83.6	UPI00006D139D	4/10		PANTHER:PTHR31212,PANTHER:PTHR31212:SF4,Gene3D:2.60.120.590	MODERATE
ALKBH3	Mmul_10	14	21867959	21867959	+	Missense_Mutation	SNP	T	T	C	rs301405153	18222	NORMAL	T	T	ENSMMUT00000104517	4/10	32	16	16	ALKBH3,missense_variant,,ENSMMUT00000104517,;ALKBH3,missense_variant,,ENSMMUT00000104994,;ALKBH3,intron_variant,,ENSMMUT00000024307,;	C	ENSMMUG00000017294	ENSMMUT00000104517	Transcript	missense_variant	400	209	70	Q/R	cAa/cGa	rs301405153			-1	ALKBH3	VGNC		protein_coding	YES		ENSMMUP00000069255		A0A5F7ZX83.6	UPI00006D139D	4/10		PANTHER:PTHR31212,PANTHER:PTHR31212:SF4,Gene3D:2.60.120.590	MODERATE
ALKBH3	Mmul_10	14	21867959	21867959	+	Missense_Mutation	SNP	T	T	C	rs301405153	18607	NORMAL	T	T	ENSMMUT00000104517	4/10	22	11	11	ALKBH3,missense_variant,,ENSMMUT00000104517,;ALKBH3,missense_variant,,ENSMMUT00000104994,;ALKBH3,intron_variant,,ENSMMUT00000024307,;	C	ENSMMUG00000017294	ENSMMUT00000104517	Transcript	missense_variant	400	209	70	Q/R	cAa/cGa	rs301405153			-1	ALKBH3	VGNC		protein_coding	YES		ENSMMUP00000069255		A0A5F7ZX83.6	UPI00006D139D	4/10		PANTHER:PTHR31212,PANTHER:PTHR31212:SF4,Gene3D:2.60.120.590	MODERATE
ALKBH3	Mmul_10	14	21867959	21867959	+	Missense_Mutation	SNP	T	T	C	rs301405153	22435	NORMAL	T	T	ENSMMUT00000104517	4/10	28	14	14	ALKBH3,missense_variant,,ENSMMUT00000104517,;ALKBH3,missense_variant,,ENSMMUT00000104994,;ALKBH3,intron_variant,,ENSMMUT00000024307,;	C	ENSMMUG00000017294	ENSMMUT00000104517	Transcript	missense_variant	400	209	70	Q/R	cAa/cGa	rs301405153			-1	ALKBH3	VGNC		protein_coding	YES		ENSMMUP00000069255		A0A5F7ZX83.6	UPI00006D139D	4/10		PANTHER:PTHR31212,PANTHER:PTHR31212:SF4,Gene3D:2.60.120.590	MODERATE
ALKBH3	Mmul_10	14	21867959	21867959	+	Missense_Mutation	SNP	T	T	C	rs301405153	25856	NORMAL	T	T	ENSMMUT00000104517	4/10	31	17	14	ALKBH3,missense_variant,,ENSMMUT00000104517,;ALKBH3,missense_variant,,ENSMMUT00000104994,;ALKBH3,intron_variant,,ENSMMUT00000024307,;	C	ENSMMUG00000017294	ENSMMUT00000104517	Transcript	missense_variant	400	209	70	Q/R	cAa/cGa	rs301405153			-1	ALKBH3	VGNC		protein_coding	YES		ENSMMUP00000069255		A0A5F7ZX83.6	UPI00006D139D	4/10		PANTHER:PTHR31212,PANTHER:PTHR31212:SF4,Gene3D:2.60.120.590	MODERATE
ALKBH3	Mmul_10	14	21867959	21867959	+	Missense_Mutation	SNP	T	T	C	rs301405153	26851	NORMAL	T	T	ENSMMUT00000104517	4/10	12	6	6	ALKBH3,missense_variant,,ENSMMUT00000104517,;ALKBH3,missense_variant,,ENSMMUT00000104994,;ALKBH3,intron_variant,,ENSMMUT00000024307,;	C	ENSMMUG00000017294	ENSMMUT00000104517	Transcript	missense_variant	400	209	70	Q/R	cAa/cGa	rs301405153			-1	ALKBH3	VGNC		protein_coding	YES		ENSMMUP00000069255		A0A5F7ZX83.6	UPI00006D139D	4/10		PANTHER:PTHR31212,PANTHER:PTHR31212:SF4,Gene3D:2.60.120.590	MODERATE
ALKBH3	Mmul_10	14	21867959	21867959	+	Missense_Mutation	SNP	T	T	C	rs301405153	27536	NORMAL	T	T	ENSMMUT00000104517	4/10	31	16	15	ALKBH3,missense_variant,,ENSMMUT00000104517,;ALKBH3,missense_variant,,ENSMMUT00000104994,;ALKBH3,intron_variant,,ENSMMUT00000024307,;	C	ENSMMUG00000017294	ENSMMUT00000104517	Transcript	missense_variant	400	209	70	Q/R	cAa/cGa	rs301405153			-1	ALKBH3	VGNC		protein_coding	YES		ENSMMUP00000069255		A0A5F7ZX83.6	UPI00006D139D	4/10		PANTHER:PTHR31212,PANTHER:PTHR31212:SF4,Gene3D:2.60.120.590	MODERATE
ALKBH3	Mmul_10	14	21867959	21867959	+	Missense_Mutation	SNP	T	T	C	rs301405153	30186	NORMAL	T	T	ENSMMUT00000104517	4/10	28	12	16	ALKBH3,missense_variant,,ENSMMUT00000104517,;ALKBH3,missense_variant,,ENSMMUT00000104994,;ALKBH3,intron_variant,,ENSMMUT00000024307,;	C	ENSMMUG00000017294	ENSMMUT00000104517	Transcript	missense_variant	400	209	70	Q/R	cAa/cGa	rs301405153			-1	ALKBH3	VGNC		protein_coding	YES		ENSMMUP00000069255		A0A5F7ZX83.6	UPI00006D139D	4/10		PANTHER:PTHR31212,PANTHER:PTHR31212:SF4,Gene3D:2.60.120.590	MODERATE
ANK1	Mmul_10	8	42239266	42239266	+	Missense_Mutation	SNP	C	C	T	rs287818000	17745	NORMAL	C	C	ENSMMUT00000097744	42/42	31	18	13	ANK1,missense_variant,,ENSMMUT00000083339,;ANK1,missense_variant,,ENSMMUT00000097744,;ANK1,intron_variant,,ENSMMUT00000020653,;ANK1,intron_variant,,ENSMMUT00000020655,;ANK1,intron_variant,,ENSMMUT00000020660,;ANK1,intron_variant,,ENSMMUT00000020661,;ANK1,intron_variant,,ENSMMUT00000039047,;ANK1,intron_variant,,ENSMMUT00000077432,;ANK1,intron_variant,,ENSMMUT00000108225,;,upstream_gene_variant,,EN…	T	ENSMMUG00000014726	ENSMMUT00000097744	Transcript	missense_variant	5756	5756	1919	R/Q	cGg/cAg	rs287818000			-1	ANK1	VGNC		protein_coding	YES		ENSMMUP00000063628		A0A5F7ZG76.6	UPI001234EAF4	42/42			MODERATE
ANK1	Mmul_10	8	42239266	42239266	+	Missense_Mutation	SNP	C	C	T	rs287818000	17979	NORMAL	C	C	ENSMMUT00000097744	42/42	26	15	11	ANK1,missense_variant,,ENSMMUT00000083339,;ANK1,missense_variant,,ENSMMUT00000097744,;ANK1,intron_variant,,ENSMMUT00000020653,;ANK1,intron_variant,,ENSMMUT00000020655,;ANK1,intron_variant,,ENSMMUT00000020660,;ANK1,intron_variant,,ENSMMUT00000020661,;ANK1,intron_variant,,ENSMMUT00000039047,;ANK1,intron_variant,,ENSMMUT00000077432,;ANK1,intron_variant,,ENSMMUT00000108225,;,upstream_gene_variant,,EN…	T	ENSMMUG00000014726	ENSMMUT00000097744	Transcript	missense_variant	5756	5756	1919	R/Q	cGg/cAg	rs287818000			-1	ANK1	VGNC		protein_coding	YES		ENSMMUP00000063628		A0A5F7ZG76.6	UPI001234EAF4	42/42			MODERATE
ANK1	Mmul_10	8	42239266	42239266	+	Missense_Mutation	SNP	C	C	T	rs287818000	18008	NORMAL	C	C	ENSMMUT00000097744	42/42	26	7	19	ANK1,missense_variant,,ENSMMUT00000083339,;ANK1,missense_variant,,ENSMMUT00000097744,;ANK1,intron_variant,,ENSMMUT00000020653,;ANK1,intron_variant,,ENSMMUT00000020655,;ANK1,intron_variant,,ENSMMUT00000020660,;ANK1,intron_variant,,ENSMMUT00000020661,;ANK1,intron_variant,,ENSMMUT00000039047,;ANK1,intron_variant,,ENSMMUT00000077432,;ANK1,intron_variant,,ENSMMUT00000108225,;,upstream_gene_variant,,EN…	T	ENSMMUG00000014726	ENSMMUT00000097744	Transcript	missense_variant	5756	5756	1919	R/Q	cGg/cAg	rs287818000			-1	ANK1	VGNC		protein_coding	YES		ENSMMUP00000063628		A0A5F7ZG76.6	UPI001234EAF4	42/42			MODERATE
ANK1	Mmul_10	8	42239266	42239266	+	Missense_Mutation	SNP	C	C	T	rs287818000	18105	NORMAL	C	C	ENSMMUT00000097744	42/42	10	4	6	ANK1,missense_variant,,ENSMMUT00000083339,;ANK1,missense_variant,,ENSMMUT00000097744,;ANK1,intron_variant,,ENSMMUT00000020653,;ANK1,intron_variant,,ENSMMUT00000020655,;ANK1,intron_variant,,ENSMMUT00000020660,;ANK1,intron_variant,,ENSMMUT00000020661,;ANK1,intron_variant,,ENSMMUT00000039047,;ANK1,intron_variant,,ENSMMUT00000077432,;ANK1,intron_variant,,ENSMMUT00000108225,;,upstream_gene_variant,,EN…	T	ENSMMUG00000014726	ENSMMUT00000097744	Transcript	missense_variant	5756	5756	1919	R/Q	cGg/cAg	rs287818000			-1	ANK1	VGNC		protein_coding	YES		ENSMMUP00000063628		A0A5F7ZG76.6	UPI001234EAF4	42/42			MODERATE
ANK1	Mmul_10	8	42239266	42239266	+	Missense_Mutation	SNP	C	C	T	rs287818000	18206	NORMAL	C	C	ENSMMUT00000097744	42/42	22	12	10	ANK1,missense_variant,,ENSMMUT00000083339,;ANK1,missense_variant,,ENSMMUT00000097744,;ANK1,intron_variant,,ENSMMUT00000020653,;ANK1,intron_variant,,ENSMMUT00000020655,;ANK1,intron_variant,,ENSMMUT00000020660,;ANK1,intron_variant,,ENSMMUT00000020661,;ANK1,intron_variant,,ENSMMUT00000039047,;ANK1,intron_variant,,ENSMMUT00000077432,;ANK1,intron_variant,,ENSMMUT00000108225,;,upstream_gene_variant,,EN…	T	ENSMMUG00000014726	ENSMMUT00000097744	Transcript	missense_variant	5756	5756	1919	R/Q	cGg/cAg	rs287818000			-1	ANK1	VGNC		protein_coding	YES		ENSMMUP00000063628		A0A5F7ZG76.6	UPI001234EAF4	42/42			MODERATE
ANK1	Mmul_10	8	42239266	42239266	+	Missense_Mutation	SNP	C	C	T	rs287818000	22256	NORMAL	C	C	ENSMMUT00000097744	42/42	37	16	21	ANK1,missense_variant,,ENSMMUT00000083339,;ANK1,missense_variant,,ENSMMUT00000097744,;ANK1,intron_variant,,ENSMMUT00000020653,;ANK1,intron_variant,,ENSMMUT00000020655,;ANK1,intron_variant,,ENSMMUT00000020660,;ANK1,intron_variant,,ENSMMUT00000020661,;ANK1,intron_variant,,ENSMMUT00000039047,;ANK1,intron_variant,,ENSMMUT00000077432,;ANK1,intron_variant,,ENSMMUT00000108225,;,upstream_gene_variant,,EN…	T	ENSMMUG00000014726	ENSMMUT00000097744	Transcript	missense_variant	5756	5756	1919	R/Q	cGg/cAg	rs287818000			-1	ANK1	VGNC		protein_coding	YES		ENSMMUP00000063628		A0A5F7ZG76.6	UPI001234EAF4	42/42			MODERATE
ANK1	Mmul_10	8	42239266	42239266	+	Missense_Mutation	SNP	C	C	T	rs287818000	22523	NORMAL	C	C	ENSMMUT00000097744	42/42	10	6	4	ANK1,missense_variant,,ENSMMUT00000083339,;ANK1,missense_variant,,ENSMMUT00000097744,;ANK1,intron_variant,,ENSMMUT00000020653,;ANK1,intron_variant,,ENSMMUT00000020655,;ANK1,intron_variant,,ENSMMUT00000020660,;ANK1,intron_variant,,ENSMMUT00000020661,;ANK1,intron_variant,,ENSMMUT00000039047,;ANK1,intron_variant,,ENSMMUT00000077432,;ANK1,intron_variant,,ENSMMUT00000108225,;,upstream_gene_variant,,EN…	T	ENSMMUG00000014726	ENSMMUT00000097744	Transcript	missense_variant	5756	5756	1919	R/Q	cGg/cAg	rs287818000			-1	ANK1	VGNC		protein_coding	YES		ENSMMUP00000063628		A0A5F7ZG76.6	UPI001234EAF4	42/42			MODERATE
ANK1	Mmul_10	8	42239266	42239266	+	Missense_Mutation	SNP	C	C	T	rs287818000	25856	NORMAL	C	C	ENSMMUT00000097744	42/42	36	14	22	ANK1,missense_variant,,ENSMMUT00000083339,;ANK1,missense_variant,,ENSMMUT00000097744,;ANK1,intron_variant,,ENSMMUT00000020653,;ANK1,intron_variant,,ENSMMUT00000020655,;ANK1,intron_variant,,ENSMMUT00000020660,;ANK1,intron_variant,,ENSMMUT00000020661,;ANK1,intron_variant,,ENSMMUT00000039047,;ANK1,intron_variant,,ENSMMUT00000077432,;ANK1,intron_variant,,ENSMMUT00000108225,;,upstream_gene_variant,,EN…	T	ENSMMUG00000014726	ENSMMUT00000097744	Transcript	missense_variant	5756	5756	1919	R/Q	cGg/cAg	rs287818000			-1	ANK1	VGNC		protein_coding	YES		ENSMMUP00000063628		A0A5F7ZG76.6	UPI001234EAF4	42/42			MODERATE
ANK1	Mmul_10	8	42239266	42239266	+	Missense_Mutation	SNP	C	C	T	rs287818000	25891	NORMAL	C	C	ENSMMUT00000097744	42/42	27	15	12	ANK1,missense_variant,,ENSMMUT00000083339,;ANK1,missense_variant,,ENSMMUT00000097744,;ANK1,intron_variant,,ENSMMUT00000020653,;ANK1,intron_variant,,ENSMMUT00000020655,;ANK1,intron_variant,,ENSMMUT00000020660,;ANK1,intron_variant,,ENSMMUT00000020661,;ANK1,intron_variant,,ENSMMUT00000039047,;ANK1,intron_variant,,ENSMMUT00000077432,;ANK1,intron_variant,,ENSMMUT00000108225,;,upstream_gene_variant,,EN…	T	ENSMMUG00000014726	ENSMMUT00000097744	Transcript	missense_variant	5756	5756	1919	R/Q	cGg/cAg	rs287818000			-1	ANK1	VGNC		protein_coding	YES		ENSMMUP00000063628		A0A5F7ZG76.6	UPI001234EAF4	42/42			MODERATE
ANK1	Mmul_10	8	42239266	42239266	+	Missense_Mutation	SNP	C	C	T	rs287818000	26851	NORMAL	C	C	ENSMMUT00000097744	42/42	7	2	5	ANK1,missense_variant,,ENSMMUT00000083339,;ANK1,missense_variant,,ENSMMUT00000097744,;ANK1,intron_variant,,ENSMMUT00000020653,;ANK1,intron_variant,,ENSMMUT00000020655,;ANK1,intron_variant,,ENSMMUT00000020660,;ANK1,intron_variant,,ENSMMUT00000020661,;ANK1,intron_variant,,ENSMMUT00000039047,;ANK1,intron_variant,,ENSMMUT00000077432,;ANK1,intron_variant,,ENSMMUT00000108225,;,upstream_gene_variant,,EN…	T	ENSMMUG00000014726	ENSMMUT00000097744	Transcript	missense_variant	5756	5756	1919	R/Q	cGg/cAg	rs287818000			-1	ANK1	VGNC		protein_coding	YES		ENSMMUP00000063628		A0A5F7ZG76.6	UPI001234EAF4	42/42			MODERATE
ANK1	Mmul_10	8	42239266	42239266	+	Missense_Mutation	SNP	C	C	T	rs287818000	30325	NORMAL	C	C	ENSMMUT00000097744	42/42	22	9	13	ANK1,missense_variant,,ENSMMUT00000083339,;ANK1,missense_variant,,ENSMMUT00000097744,;ANK1,intron_variant,,ENSMMUT00000020653,;ANK1,intron_variant,,ENSMMUT00000020655,;ANK1,intron_variant,,ENSMMUT00000020660,;ANK1,intron_variant,,ENSMMUT00000020661,;ANK1,intron_variant,,ENSMMUT00000039047,;ANK1,intron_variant,,ENSMMUT00000077432,;ANK1,intron_variant,,ENSMMUT00000108225,;,upstream_gene_variant,,EN…	T	ENSMMUG00000014726	ENSMMUT00000097744	Transcript	missense_variant	5756	5756	1919	R/Q	cGg/cAg	rs287818000			-1	ANK1	VGNC		protein_coding	YES		ENSMMUP00000063628		A0A5F7ZG76.6	UPI001234EAF4	42/42			MODERATE
ANKRD11	Mmul_10	20	76308990	76308990	+	Missense_Mutation	SNP	G	G	A	rs1079375511	18090	NORMAL	G	G	ENSMMUT00000098980	8/11	26	10	16	ANKRD11,missense_variant,,ENSMMUT00000024121,;ANKRD11,missense_variant,,ENSMMUT00000098980,;ANKRD11,missense_variant,,ENSMMUT00000109916,;	A	ENSMMUG00000017161	ENSMMUT00000098980	Transcript	missense_variant	5516	5372	1791	P/L	cCt/cTt	rs1079375511			-1	ANKRD11	VGNC		protein_coding	YES		ENSMMUP00000077607		A0A5F8AKX8.4	UPI0012363119	8/11		PANTHER:PTHR24145	MODERATE
ANKRD11	Mmul_10	20	76310819	76310819	+	Missense_Mutation	SNP	T	T	A	rs297290007	17686	NORMAL	T	T	ENSMMUT00000098980	8/11	29	18	11	ANKRD11,missense_variant,,ENSMMUT00000024121,;ANKRD11,missense_variant,,ENSMMUT00000098980,;ANKRD11,missense_variant,,ENSMMUT00000109916,;ANKRD11,downstream_gene_variant,,ENSMMUT00000086438,;ANKRD11,downstream_gene_variant,,ENSMMUT00000104964,;	A	ENSMMUG00000017161	ENSMMUT00000098980	Transcript	missense_variant	3687	3543	1181	E/D	gaA/gaT	rs297290007			-1	ANKRD11	VGNC		protein_coding	YES		ENSMMUP00000077607		A0A5F8AKX8.4	UPI0012363119	8/11		Low_complexity_(Seg):seg,MobiDB_lite:mobidb-lite,MobiDB_lite:mobidb-lite,PANTHER:PTHR24145	MODERATE
ANKRD11	Mmul_10	20	76310819	76310819	+	Missense_Mutation	SNP	T	T	A	rs297290007	17694	NORMAL	T	T	ENSMMUT00000098980	8/11	14	7	7	ANKRD11,missense_variant,,ENSMMUT00000024121,;ANKRD11,missense_variant,,ENSMMUT00000098980,;ANKRD11,missense_variant,,ENSMMUT00000109916,;ANKRD11,downstream_gene_variant,,ENSMMUT00000086438,;ANKRD11,downstream_gene_variant,,ENSMMUT00000104964,;	A	ENSMMUG00000017161	ENSMMUT00000098980	Transcript	missense_variant	3687	3543	1181	E/D	gaA/gaT	rs297290007			-1	ANKRD11	VGNC		protein_coding	YES		ENSMMUP00000077607		A0A5F8AKX8.4	UPI0012363119	8/11		Low_complexity_(Seg):seg,MobiDB_lite:mobidb-lite,MobiDB_lite:mobidb-lite,PANTHER:PTHR24145	MODERATE
ANKRD11	Mmul_10	20	76310819	76310819	+	Missense_Mutation	SNP	T	T	A	rs297290007	17893	NORMAL	T	T	ENSMMUT00000098980	8/11	26	12	14	ANKRD11,missense_variant,,ENSMMUT00000024121,;ANKRD11,missense_variant,,ENSMMUT00000098980,;ANKRD11,missense_variant,,ENSMMUT00000109916,;ANKRD11,downstream_gene_variant,,ENSMMUT00000086438,;ANKRD11,downstream_gene_variant,,ENSMMUT00000104964,;	A	ENSMMUG00000017161	ENSMMUT00000098980	Transcript	missense_variant	3687	3543	1181	E/D	gaA/gaT	rs297290007			-1	ANKRD11	VGNC		protein_coding	YES		ENSMMUP00000077607		A0A5F8AKX8.4	UPI0012363119	8/11		Low_complexity_(Seg):seg,MobiDB_lite:mobidb-lite,MobiDB_lite:mobidb-lite,PANTHER:PTHR24145	MODERATE
ANKRD11	Mmul_10	20	76310819	76310819	+	Missense_Mutation	SNP	T	T	A	rs297290007	17979	NORMAL	T	T	ENSMMUT00000098980	8/11	22	12	10	ANKRD11,missense_variant,,ENSMMUT00000024121,;ANKRD11,missense_variant,,ENSMMUT00000098980,;ANKRD11,missense_variant,,ENSMMUT00000109916,;ANKRD11,downstream_gene_variant,,ENSMMUT00000086438,;ANKRD11,downstream_gene_variant,,ENSMMUT00000104964,;	A	ENSMMUG00000017161	ENSMMUT00000098980	Transcript	missense_variant	3687	3543	1181	E/D	gaA/gaT	rs297290007			-1	ANKRD11	VGNC		protein_coding	YES		ENSMMUP00000077607		A0A5F8AKX8.4	UPI0012363119	8/11		Low_complexity_(Seg):seg,MobiDB_lite:mobidb-lite,MobiDB_lite:mobidb-lite,PANTHER:PTHR24145	MODERATE
ANKRD11	Mmul_10	20	76310819	76310819	+	Missense_Mutation	SNP	T	T	A	rs297290007	18087	NORMAL	T	T	ENSMMUT00000098980	8/11	25	15	10	ANKRD11,missense_variant,,ENSMMUT00000024121,;ANKRD11,missense_variant,,ENSMMUT00000098980,;ANKRD11,missense_variant,,ENSMMUT00000109916,;ANKRD11,downstream_gene_variant,,ENSMMUT00000086438,;ANKRD11,downstream_gene_variant,,ENSMMUT00000104964,;	A	ENSMMUG00000017161	ENSMMUT00000098980	Transcript	missense_variant	3687	3543	1181	E/D	gaA/gaT	rs297290007			-1	ANKRD11	VGNC		protein_coding	YES		ENSMMUP00000077607		A0A5F8AKX8.4	UPI0012363119	8/11		Low_complexity_(Seg):seg,MobiDB_lite:mobidb-lite,MobiDB_lite:mobidb-lite,PANTHER:PTHR24145	MODERATE
ANKRD11	Mmul_10	20	76310819	76310819	+	Missense_Mutation	SNP	T	T	A	rs297290007	18090	NORMAL	T	T	ENSMMUT00000098980	8/11	24	11	13	ANKRD11,missense_variant,,ENSMMUT00000024121,;ANKRD11,missense_variant,,ENSMMUT00000098980,;ANKRD11,missense_variant,,ENSMMUT00000109916,;ANKRD11,downstream_gene_variant,,ENSMMUT00000086438,;ANKRD11,downstream_gene_variant,,ENSMMUT00000104964,;	A	ENSMMUG00000017161	ENSMMUT00000098980	Transcript	missense_variant	3687	3543	1181	E/D	gaA/gaT	rs297290007			-1	ANKRD11	VGNC		protein_coding	YES		ENSMMUP00000077607		A0A5F8AKX8.4	UPI0012363119	8/11		Low_complexity_(Seg):seg,MobiDB_lite:mobidb-lite,MobiDB_lite:mobidb-lite,PANTHER:PTHR24145	MODERATE
ANKRD11	Mmul_10	20	76310819	76310819	+	Missense_Mutation	SNP	T	T	A	rs297290007	18111	NORMAL	T	T	ENSMMUT00000098980	8/11	25	12	13	ANKRD11,missense_variant,,ENSMMUT00000024121,;ANKRD11,missense_variant,,ENSMMUT00000098980,;ANKRD11,missense_variant,,ENSMMUT00000109916,;ANKRD11,downstream_gene_variant,,ENSMMUT00000086438,;ANKRD11,downstream_gene_variant,,ENSMMUT00000104964,;	A	ENSMMUG00000017161	ENSMMUT00000098980	Transcript	missense_variant	3687	3543	1181	E/D	gaA/gaT	rs297290007			-1	ANKRD11	VGNC		protein_coding	YES		ENSMMUP00000077607		A0A5F8AKX8.4	UPI0012363119	8/11		Low_complexity_(Seg):seg,MobiDB_lite:mobidb-lite,MobiDB_lite:mobidb-lite,PANTHER:PTHR24145	MODERATE
ANKRD11	Mmul_10	20	76310819	76310819	+	Missense_Mutation	SNP	T	T	A	rs297290007	18206	NORMAL	T	T	ENSMMUT00000098980	8/11	24	10	14	ANKRD11,missense_variant,,ENSMMUT00000024121,;ANKRD11,missense_variant,,ENSMMUT00000098980,;ANKRD11,missense_variant,,ENSMMUT00000109916,;ANKRD11,downstream_gene_variant,,ENSMMUT00000086438,;ANKRD11,downstream_gene_variant,,ENSMMUT00000104964,;	A	ENSMMUG00000017161	ENSMMUT00000098980	Transcript	missense_variant	3687	3543	1181	E/D	gaA/gaT	rs297290007			-1	ANKRD11	VGNC		protein_coding	YES		ENSMMUP00000077607		A0A5F8AKX8.4	UPI0012363119	8/11		Low_complexity_(Seg):seg,MobiDB_lite:mobidb-lite,MobiDB_lite:mobidb-lite,PANTHER:PTHR24145	MODERATE
ANKRD11	Mmul_10	20	76310819	76310819	+	Missense_Mutation	SNP	T	T	A	rs297290007	22256	NORMAL	T	T	ENSMMUT00000098980	8/11	27	13	14	ANKRD11,missense_variant,,ENSMMUT00000024121,;ANKRD11,missense_variant,,ENSMMUT00000098980,;ANKRD11,missense_variant,,ENSMMUT00000109916,;ANKRD11,downstream_gene_variant,,ENSMMUT00000086438,;ANKRD11,downstream_gene_variant,,ENSMMUT00000104964,;	A	ENSMMUG00000017161	ENSMMUT00000098980	Transcript	missense_variant	3687	3543	1181	E/D	gaA/gaT	rs297290007			-1	ANKRD11	VGNC		protein_coding	YES		ENSMMUP00000077607		A0A5F8AKX8.4	UPI0012363119	8/11		Low_complexity_(Seg):seg,MobiDB_lite:mobidb-lite,MobiDB_lite:mobidb-lite,PANTHER:PTHR24145	MODERATE
ANKRD11	Mmul_10	20	76310819	76310819	+	Missense_Mutation	SNP	T	T	A	rs297290007	25856	NORMAL	T	T	ENSMMUT00000098980	8/11	21	10	11	ANKRD11,missense_variant,,ENSMMUT00000024121,;ANKRD11,missense_variant,,ENSMMUT00000098980,;ANKRD11,missense_variant,,ENSMMUT00000109916,;ANKRD11,downstream_gene_variant,,ENSMMUT00000086438,;ANKRD11,downstream_gene_variant,,ENSMMUT00000104964,;	A	ENSMMUG00000017161	ENSMMUT00000098980	Transcript	missense_variant	3687	3543	1181	E/D	gaA/gaT	rs297290007			-1	ANKRD11	VGNC		protein_coding	YES		ENSMMUP00000077607		A0A5F8AKX8.4	UPI0012363119	8/11		Low_complexity_(Seg):seg,MobiDB_lite:mobidb-lite,MobiDB_lite:mobidb-lite,PANTHER:PTHR24145	MODERATE
ANKRD11	Mmul_10	20	76310819	76310819	+	Missense_Mutation	SNP	T	T	A	rs297290007	27515	NORMAL	T	T	ENSMMUT00000098980	8/11	20	6	14	ANKRD11,missense_variant,,ENSMMUT00000024121,;ANKRD11,missense_variant,,ENSMMUT00000098980,;ANKRD11,missense_variant,,ENSMMUT00000109916,;ANKRD11,downstream_gene_variant,,ENSMMUT00000086438,;ANKRD11,downstream_gene_variant,,ENSMMUT00000104964,;	A	ENSMMUG00000017161	ENSMMUT00000098980	Transcript	missense_variant	3687	3543	1181	E/D	gaA/gaT	rs297290007			-1	ANKRD11	VGNC		protein_coding	YES		ENSMMUP00000077607		A0A5F8AKX8.4	UPI0012363119	8/11		Low_complexity_(Seg):seg,MobiDB_lite:mobidb-lite,MobiDB_lite:mobidb-lite,PANTHER:PTHR24145	MODERATE
ANKRD11	Mmul_10	20	76310819	76310819	+	Missense_Mutation	SNP	T	T	A	rs297290007	27521	NORMAL	T	T	ENSMMUT00000098980	8/11	16	6	10	ANKRD11,missense_variant,,ENSMMUT00000024121,;ANKRD11,missense_variant,,ENSMMUT00000098980,;ANKRD11,missense_variant,,ENSMMUT00000109916,;ANKRD11,downstream_gene_variant,,ENSMMUT00000086438,;ANKRD11,downstream_gene_variant,,ENSMMUT00000104964,;	A	ENSMMUG00000017161	ENSMMUT00000098980	Transcript	missense_variant	3687	3543	1181	E/D	gaA/gaT	rs297290007			-1	ANKRD11	VGNC		protein_coding	YES		ENSMMUP00000077607		A0A5F8AKX8.4	UPI0012363119	8/11		Low_complexity_(Seg):seg,MobiDB_lite:mobidb-lite,MobiDB_lite:mobidb-lite,PANTHER:PTHR24145	MODERATE
ANKRD11	Mmul_10	20	76310819	76310819	+	Missense_Mutation	SNP	T	T	A	rs297290007	27536	NORMAL	T	T	ENSMMUT00000098980	8/11	25	11	14	ANKRD11,missense_variant,,ENSMMUT00000024121,;ANKRD11,missense_variant,,ENSMMUT00000098980,;ANKRD11,missense_variant,,ENSMMUT00000109916,;ANKRD11,downstream_gene_variant,,ENSMMUT00000086438,;ANKRD11,downstream_gene_variant,,ENSMMUT00000104964,;	A	ENSMMUG00000017161	ENSMMUT00000098980	Transcript	missense_variant	3687	3543	1181	E/D	gaA/gaT	rs297290007			-1	ANKRD11	VGNC		protein_coding	YES		ENSMMUP00000077607		A0A5F8AKX8.4	UPI0012363119	8/11		Low_complexity_(Seg):seg,MobiDB_lite:mobidb-lite,MobiDB_lite:mobidb-lite,PANTHER:PTHR24145	MODERATE
ANKRD11	Mmul_10	20	76310823	76310823	+	Missense_Mutation	SNP	T	T	C	novel	22435	NORMAL	T	T	ENSMMUT00000098980	8/11	22	11	11	ANKRD11,missense_variant,,ENSMMUT00000024121,;ANKRD11,missense_variant,,ENSMMUT00000098980,;ANKRD11,missense_variant,,ENSMMUT00000109916,;ANKRD11,downstream_gene_variant,,ENSMMUT00000086438,;ANKRD11,downstream_gene_variant,,ENSMMUT00000104964,;	C	ENSMMUG00000017161	ENSMMUT00000098980	Transcript	missense_variant	3683	3539	1180	K/R	aAg/aGg				-1	ANKRD11	VGNC		protein_coding	YES		ENSMMUP00000077607		A0A5F8AKX8.4	UPI0012363119	8/11		Low_complexity_(Seg):seg,MobiDB_lite:mobidb-lite,MobiDB_lite:mobidb-lite,PANTHER:PTHR24145	MODERATE
ANKRD11	Mmul_10	20	76311904	76311904	+	Missense_Mutation	SNP	T	T	C	rs1068697448	21742	NORMAL	T	T	ENSMMUT00000098980	8/11	36	19	17	ANKRD11,missense_variant,,ENSMMUT00000024121,;ANKRD11,missense_variant,,ENSMMUT00000098980,;ANKRD11,missense_variant,,ENSMMUT00000109916,;ANKRD11,downstream_gene_variant,,ENSMMUT00000086438,;ANKRD11,downstream_gene_variant,,ENSMMUT00000104964,;	C	ENSMMUG00000017161	ENSMMUT00000098980	Transcript	missense_variant	2602	2458	820	N/D	Aac/Gac	rs1068697448			-1	ANKRD11	VGNC		protein_coding	YES		ENSMMUP00000077607		A0A5F8AKX8.4	UPI0012363119	8/11		PANTHER:PTHR24145	MODERATE
ANKRD11	Mmul_10	20	76312801	76312801	+	Missense_Mutation	SNP	C	C	T	novel	22435	NORMAL	C	C	ENSMMUT00000098980	8/11	26	17	9	ANKRD11,missense_variant,,ENSMMUT00000024121,;ANKRD11,missense_variant,,ENSMMUT00000098980,;ANKRD11,missense_variant,,ENSMMUT00000109916,;ANKRD11,downstream_gene_variant,,ENSMMUT00000086438,;ANKRD11,downstream_gene_variant,,ENSMMUT00000104964,;	T	ENSMMUG00000017161	ENSMMUT00000098980	Transcript	missense_variant	1705	1561	521	A/T	Gcc/Acc				-1	ANKRD11	VGNC		protein_coding	YES		ENSMMUP00000077607		A0A5F8AKX8.4	UPI0012363119	8/11		Low_complexity_(Seg):seg,MobiDB_lite:mobidb-lite,MobiDB_lite:mobidb-lite,PANTHER:PTHR24145	MODERATE
ANKRD11	Mmul_10	20	76312999	76312999	+	Missense_Mutation	SNP	G	G	T	novel	22435	NORMAL	G	G	ENSMMUT00000098980	8/11	18	10	8	ANKRD11,missense_variant,,ENSMMUT00000024121,;ANKRD11,missense_variant,,ENSMMUT00000098980,;ANKRD11,missense_variant,,ENSMMUT00000109916,;ANKRD11,downstream_gene_variant,,ENSMMUT00000086438,;ANKRD11,downstream_gene_variant,,ENSMMUT00000104964,;	T	ENSMMUG00000017161	ENSMMUT00000098980	Transcript	missense_variant	1507	1363	455	L/I	Ctt/Att				-1	ANKRD11	VGNC		protein_coding	YES		ENSMMUP00000077607		A0A5F8AKX8.4	UPI0012363119	8/11		Low_complexity_(Seg):seg,MobiDB_lite:mobidb-lite,MobiDB_lite:mobidb-lite,PANTHER:PTHR24145	MODERATE
ANKRD11	Mmul_10	20	76313395	76313395	+	Nonsense_Mutation	SNP	C	C	A	novel	30325	NORMAL	C	C	ENSMMUT00000098980	8/11	16	13	3	ANKRD11,stop_gained,,ENSMMUT00000024121,;ANKRD11,stop_gained,,ENSMMUT00000098980,;ANKRD11,stop_gained,,ENSMMUT00000109916,;ANKRD11,downstream_gene_variant,,ENSMMUT00000086438,;ANKRD11,downstream_gene_variant,,ENSMMUT00000104964,;	A	ENSMMUG00000017161	ENSMMUT00000098980	Transcript	stop_gained	1111	967	323	E/*	Gag/Tag				-1	ANKRD11	VGNC		protein_coding	YES		ENSMMUP00000077607		A0A5F8AKX8.4	UPI0012363119	8/11		MobiDB_lite:mobidb-lite,MobiDB_lite:mobidb-lite,PANTHER:PTHR24145	HIGH
ANO5	Mmul_10	14	43311478	43311478	+	Missense_Mutation	SNP	T	T	G	novel	17686	NORMAL	T	T	ENSMMUT00000008653	10/22	28	10	18	ANO5,missense_variant,,ENSMMUT00000008653,;ANO5,missense_variant,,ENSMMUT00000081451,;ANO5,missense_variant,,ENSMMUT00000096242,;	G	ENSMMUG00000006183	ENSMMUT00000008653	Transcript	missense_variant	1800	1800	600	E/D	gaA/gaC				-1	ANO5	VGNC		protein_coding	YES		ENSMMUP00000008133		F7HQS3.54	UPI0010A24D65	10/22		Pfam:PF04547,PANTHER:PTHR12308,PANTHER:PTHR12308:SF23	MODERATE
ANO5	Mmul_10	14	43311478	43311478	+	Missense_Mutation	SNP	T	T	G	novel	18241	NORMAL	T	T	ENSMMUT00000008653	10/22	20	13	7	ANO5,missense_variant,,ENSMMUT00000008653,;ANO5,missense_variant,,ENSMMUT00000081451,;ANO5,missense_variant,,ENSMMUT00000096242,;	G	ENSMMUG00000006183	ENSMMUT00000008653	Transcript	missense_variant	1800	1800	600	E/D	gaA/gaC				-1	ANO5	VGNC		protein_coding	YES		ENSMMUP00000008133		F7HQS3.54	UPI0010A24D65	10/22		Pfam:PF04547,PANTHER:PTHR12308,PANTHER:PTHR12308:SF23	MODERATE
ANO5	Mmul_10	14	43371308	43371308	+	Missense_Mutation	SNP	C	C	T	novel	17686	NORMAL	C	C	ENSMMUT00000008653	1/22	26	11	15	ANO5,missense_variant,,ENSMMUT00000008653,;ANO5,missense_variant,,ENSMMUT00000081451,;	T	ENSMMUG00000006183	ENSMMUT00000008653	Transcript	missense_variant	752	752	251	R/H	cGc/cAc				-1	ANO5	VGNC		protein_coding	YES		ENSMMUP00000008133		F7HQS3.54	UPI0010A24D65	1/22			MODERATE
ANO5	Mmul_10	14	43371308	43371308	+	Missense_Mutation	SNP	C	C	T	novel	18241	NORMAL	C	C	ENSMMUT00000008653	1/22	39	22	17	ANO5,missense_variant,,ENSMMUT00000008653,;ANO5,missense_variant,,ENSMMUT00000081451,;	T	ENSMMUG00000006183	ENSMMUT00000008653	Transcript	missense_variant	752	752	251	R/H	cGc/cAc				-1	ANO5	VGNC		protein_coding	YES		ENSMMUP00000008133		F7HQS3.54	UPI0010A24D65	1/22			MODERATE
ANO5	Mmul_10	14	43371332	43371332	+	Missense_Mutation	SNP	C	C	A	novel	17686	NORMAL	C	C	ENSMMUT00000008653	1/22	25	11	14	ANO5,missense_variant,,ENSMMUT00000008653,;ANO5,missense_variant,,ENSMMUT00000081451,;	A	ENSMMUG00000006183	ENSMMUT00000008653	Transcript	missense_variant	728	728	243	R/I	aGa/aTa				-1	ANO5	VGNC		protein_coding	YES		ENSMMUP00000008133		F7HQS3.54	UPI0010A24D65	1/22			MODERATE
ANO5	Mmul_10	14	43371332	43371332	+	Missense_Mutation	SNP	C	C	A	novel	18241	NORMAL	C	C	ENSMMUT00000008653	1/22	35	19	16	ANO5,missense_variant,,ENSMMUT00000008653,;ANO5,missense_variant,,ENSMMUT00000081451,;	A	ENSMMUG00000006183	ENSMMUT00000008653	Transcript	missense_variant	728	728	243	R/I	aGa/aTa				-1	ANO5	VGNC		protein_coding	YES		ENSMMUP00000008133		F7HQS3.54	UPI0010A24D65	1/22			MODERATE
ANO5	Mmul_10	14	43371800	43371800	+	Missense_Mutation	SNP	T	T	C	novel	17943	NORMAL	T	T	ENSMMUT00000008653	1/22	19	9	10	ANO5,missense_variant,,ENSMMUT00000008653,;ANO5,missense_variant,,ENSMMUT00000081451,;	C	ENSMMUG00000006183	ENSMMUT00000008653	Transcript	missense_variant	260	260	87	E/G	gAg/gGg				-1	ANO5	VGNC		protein_coding	YES		ENSMMUP00000008133		F7HQS3.54	UPI0010A24D65	1/22		MobiDB_lite:mobidb-lite	MODERATE
ANO5	Mmul_10	14	43371834	43371834	+	Missense_Mutation	SNP	C	C	G	novel	22256	NORMAL	C	C	ENSMMUT00000008653	1/22	16	14	2	ANO5,missense_variant,,ENSMMUT00000008653,;ANO5,missense_variant,,ENSMMUT00000081451,;	G	ENSMMUG00000006183	ENSMMUT00000008653	Transcript	missense_variant	226	226	76	A/P	Gcc/Ccc				-1	ANO5	VGNC		protein_coding	YES		ENSMMUP00000008133		F7HQS3.54	UPI0010A24D65	1/22		MobiDB_lite:mobidb-lite	MODERATE
ANXA6	Mmul_10	6	148577141	148577141	+	Splice_Site	SNP	C	C	T	novel	18122	NORMAL	C	C	ENSMMUT00000068009		24	15	9	ANXA6,splice_donor_variant,,ENSMMUT00000029606,;ANXA6,splice_donor_variant,,ENSMMUT00000029607,;ANXA6,splice_donor_variant,,ENSMMUT00000068009,;	T	ENSMMUG00000021053	ENSMMUT00000068009	Transcript	splice_donor_variant									-1	ANXA6	VGNC		protein_coding	YES		ENSMMUP00000044833		H9ESF6.53	UPI00025745A2		13/25		HIGH
APC	Mmul_10	6	110360600	110360600	+	Missense_Mutation	SNP	G	G	T	rs294137360	17944	NORMAL	G	G	ENSMMUT00000098687	16/16	26	14	12	APC,missense_variant,,ENSMMUT00000000482,;APC,missense_variant,,ENSMMUT00000055989,;APC,missense_variant,,ENSMMUT00000064863,;APC,missense_variant,,ENSMMUT00000080720,;APC,missense_variant,,ENSMMUT00000089917,;APC,missense_variant,,ENSMMUT00000098687,;APC,missense_variant,,ENSMMUT00000104116,;	T	ENSMMUG00000000330	ENSMMUT00000098687	Transcript	missense_variant	2441	2441	814	R/L	cGt/cTt	rs294137360			1	APC	VGNC		protein_coding	YES		ENSMMUP00000069798		A0A5F7ZYR8.6	UPI0010A24383	16/16		Pfam:PF16629,PANTHER:PTHR12607,PANTHER:PTHR12607:SF11,MobiDB_lite:mobidb-lite	MODERATE
APC	Mmul_10	6	110360600	110360600	+	Missense_Mutation	SNP	G	G	T	rs294137360	18110	NORMAL	G	G	ENSMMUT00000098687	16/16	37	18	19	APC,missense_variant,,ENSMMUT00000000482,;APC,missense_variant,,ENSMMUT00000055989,;APC,missense_variant,,ENSMMUT00000064863,;APC,missense_variant,,ENSMMUT00000080720,;APC,missense_variant,,ENSMMUT00000089917,;APC,missense_variant,,ENSMMUT00000098687,;APC,missense_variant,,ENSMMUT00000104116,;	T	ENSMMUG00000000330	ENSMMUT00000098687	Transcript	missense_variant	2441	2441	814	R/L	cGt/cTt	rs294137360			1	APC	VGNC		protein_coding	YES		ENSMMUP00000069798		A0A5F7ZYR8.6	UPI0010A24383	16/16		Pfam:PF16629,PANTHER:PTHR12607,PANTHER:PTHR12607:SF11,MobiDB_lite:mobidb-lite	MODERATE
APC	Mmul_10	6	110360600	110360600	+	Missense_Mutation	SNP	G	G	T	rs294137360	26440	NORMAL	G	G	ENSMMUT00000098687	16/16	18	5	13	APC,missense_variant,,ENSMMUT00000000482,;APC,missense_variant,,ENSMMUT00000055989,;APC,missense_variant,,ENSMMUT00000064863,;APC,missense_variant,,ENSMMUT00000080720,;APC,missense_variant,,ENSMMUT00000089917,;APC,missense_variant,,ENSMMUT00000098687,;APC,missense_variant,,ENSMMUT00000104116,;	T	ENSMMUG00000000330	ENSMMUT00000098687	Transcript	missense_variant	2441	2441	814	R/L	cGt/cTt	rs294137360			1	APC	VGNC		protein_coding	YES		ENSMMUP00000069798		A0A5F7ZYR8.6	UPI0010A24383	16/16		Pfam:PF16629,PANTHER:PTHR12607,PANTHER:PTHR12607:SF11,MobiDB_lite:mobidb-lite	MODERATE
ARHGAP26	Mmul_10	6	140338566	140338566	+	Missense_Mutation	SNP	C	C	T	rs1067514163	17943	NORMAL	C	C	ENSMMUT00000101960	11/22	25	12	13	ARHGAP26,missense_variant,,ENSMMUT00000000613,;ARHGAP26,missense_variant,,ENSMMUT00000040918,;ARHGAP26,missense_variant,,ENSMMUT00000080198,;ARHGAP26,missense_variant,,ENSMMUT00000082072,;ARHGAP26,missense_variant,,ENSMMUT00000093423,;ARHGAP26,missense_variant,,ENSMMUT00000097058,;ARHGAP26,missense_variant,,ENSMMUT00000097966,;ARHGAP26,missense_variant,,ENSMMUT00000101960,;ARHGAP26,missense_varia…	T	ENSMMUG00000000419	ENSMMUT00000101960	Transcript	missense_variant,splice_region_variant	1030	1030	344	P/S	Cca/Tca	rs1067514163			1	ARHGAP26	VGNC		protein_coding	YES		ENSMMUP00000072055		A0A5F8A570.6	UPI00123515BE	11/22		Gene3D:2.30.29.30,Pfam:PF00169,PROSITE_profiles:PS50003,PANTHER:PTHR12552,PANTHER:PTHR12552:SF4,SMART:SM00233,Superfamily:SSF50729,CDD:cd01249	MODERATE
ARHGAP5	Mmul_10	7	94165326	94165326	+	Missense_Mutation	SNP	G	G	A	novel	21847	NORMAL	G	G	ENSMMUT00000039936	2/8	27	15	12	ARHGAP5,missense_variant,,ENSMMUT00000039936,;	A	ENSMMUG00000016346	ENSMMUT00000039936	Transcript	missense_variant	740	493	165	V/I	Gta/Ata				1	ARHGAP5	VGNC		protein_coding	YES		ENSMMUP00000032997		F7D700.59	UPI001235555F	2/8		Gene3D:3.40.50.300,Pfam:PF00071,PANTHER:PTHR46005,PANTHER:PTHR46005:SF2,Superfamily:SSF52540	MODERATE
ARHGAP5	Mmul_10	7	94165326	94165326	+	Missense_Mutation	SNP	G	G	A	novel	30186	NORMAL	G	G	ENSMMUT00000039936	2/8	19	9	10	ARHGAP5,missense_variant,,ENSMMUT00000039936,;	A	ENSMMUG00000016346	ENSMMUT00000039936	Transcript	missense_variant	740	493	165	V/I	Gta/Ata				1	ARHGAP5	VGNC		protein_coding	YES		ENSMMUP00000032997		F7D700.59	UPI001235555F	2/8		Gene3D:3.40.50.300,Pfam:PF00071,PANTHER:PTHR46005,PANTHER:PTHR46005:SF2,Superfamily:SSF52540	MODERATE
ARHGAP5	Mmul_10	7	94165815	94165815	+	Frame_Shift_Del	DEL	C	C	-	novel	17874	NORMAL	C	C	ENSMMUT00000039936	2/8	16	13	3	ARHGAP5,frameshift_variant,,ENSMMUT00000039936,;	-	ENSMMUG00000016346	ENSMMUT00000039936	Transcript	frameshift_variant	1229	982	328	Q/X	Cag/ag				1	ARHGAP5	VGNC		protein_coding	YES		ENSMMUP00000032997		F7D700.59	UPI001235555F	2/8		Gene3D:1.10.10.440,Coiled-coils_(Ncoils):Coil,Pfam:PF16512,PANTHER:PTHR46005,PANTHER:PTHR46005:SF2	HIGH
ARHGAP5	Mmul_10	7	94165816	94165816	+	Frame_Shift_Del	DEL	A	A	-	novel	18098	NORMAL	A	A	ENSMMUT00000039936	2/8	20	17	3	ARHGAP5,frameshift_variant,,ENSMMUT00000039936,;	-	ENSMMUG00000016346	ENSMMUT00000039936	Transcript	frameshift_variant	1230	983	328	Q/X	cAg/cg				1	ARHGAP5	VGNC		protein_coding	YES		ENSMMUP00000032997		F7D700.59	UPI001235555F	2/8		Gene3D:1.10.10.440,Coiled-coils_(Ncoils):Coil,Pfam:PF16512,PANTHER:PTHR46005,PANTHER:PTHR46005:SF2	HIGH
ARHGAP5	Mmul_10	7	94165816	94165816	+	Missense_Mutation	SNP	A	A	T	novel	17874	NORMAL	A	A	ENSMMUT00000039936	2/8	17	14	3	ARHGAP5,missense_variant,,ENSMMUT00000039936,;	T	ENSMMUG00000016346	ENSMMUT00000039936	Transcript	missense_variant	1230	983	328	Q/L	cAg/cTg				1	ARHGAP5	VGNC		protein_coding	YES		ENSMMUP00000032997		F7D700.59	UPI001235555F	2/8		Gene3D:1.10.10.440,Coiled-coils_(Ncoils):Coil,Pfam:PF16512,PANTHER:PTHR46005,PANTHER:PTHR46005:SF2	MODERATE
ARHGAP5	Mmul_10	7	94165977	94165977	+	Nonsense_Mutation	SNP	G	G	T	rs1069732702	22523	NORMAL	G	G	ENSMMUT00000039936	2/8	30	26	4	ARHGAP5,stop_gained,,ENSMMUT00000039936,;	T	ENSMMUG00000016346	ENSMMUT00000039936	Transcript	stop_gained	1391	1144	382	E/*	Gaa/Taa	rs1069732702			1	ARHGAP5	VGNC		protein_coding	YES		ENSMMUP00000032997		F7D700.59	UPI001235555F	2/8		PROSITE_profiles:PS51676,PANTHER:PTHR46005,PANTHER:PTHR46005:SF2,SMART:SM00441	HIGH
ARHGAP5	Mmul_10	7	94165977	94165977	+	Nonsense_Mutation	SNP	G	G	T	rs1069732702	30325	NORMAL	G	G	ENSMMUT00000039936	2/8	23	19	4	ARHGAP5,stop_gained,,ENSMMUT00000039936,;	T	ENSMMUG00000016346	ENSMMUT00000039936	Transcript	stop_gained	1391	1144	382	E/*	Gaa/Taa	rs1069732702			1	ARHGAP5	VGNC		protein_coding	YES		ENSMMUP00000032997		F7D700.59	UPI001235555F	2/8		PROSITE_profiles:PS51676,PANTHER:PTHR46005,PANTHER:PTHR46005:SF2,SMART:SM00441	HIGH
ARHGAP5	Mmul_10	7	94165990	94165990	+	Missense_Mutation	SNP	G	G	T	novel	18167	NORMAL	G	G	ENSMMUT00000039936	2/8	23	20	3	ARHGAP5,missense_variant,,ENSMMUT00000039936,;	T	ENSMMUG00000016346	ENSMMUT00000039936	Transcript	missense_variant	1404	1157	386	W/L	tGg/tTg				1	ARHGAP5	VGNC		protein_coding	YES		ENSMMUP00000032997		F7D700.59	UPI001235555F	2/8		PROSITE_profiles:PS51676,PANTHER:PTHR46005,PANTHER:PTHR46005:SF2,SMART:SM00441	MODERATE
ARHGAP5	Mmul_10	7	94165990	94165990	+	Missense_Mutation	SNP	G	G	T	novel	27513	NORMAL	G	G	ENSMMUT00000039936	2/8	41	35	6	ARHGAP5,missense_variant,,ENSMMUT00000039936,;	T	ENSMMUG00000016346	ENSMMUT00000039936	Transcript	missense_variant	1404	1157	386	W/L	tGg/tTg				1	ARHGAP5	VGNC		protein_coding	YES		ENSMMUP00000032997		F7D700.59	UPI001235555F	2/8		PROSITE_profiles:PS51676,PANTHER:PTHR46005,PANTHER:PTHR46005:SF2,SMART:SM00441	MODERATE
ARHGAP5	Mmul_10	7	94165990	94165990	+	Missense_Mutation	SNP	G	G	T	novel	27516	NORMAL	G	G	ENSMMUT00000039936	2/8	23	20	3	ARHGAP5,missense_variant,,ENSMMUT00000039936,;	T	ENSMMUG00000016346	ENSMMUT00000039936	Transcript	missense_variant	1404	1157	386	W/L	tGg/tTg				1	ARHGAP5	VGNC		protein_coding	YES		ENSMMUP00000032997		F7D700.59	UPI001235555F	2/8		PROSITE_profiles:PS51676,PANTHER:PTHR46005,PANTHER:PTHR46005:SF2,SMART:SM00441	MODERATE
ARHGAP5	Mmul_10	7	94165990	94165990	+	Missense_Mutation	SNP	G	G	T	novel	30325	NORMAL	G	G	ENSMMUT00000039936	2/8	24	21	3	ARHGAP5,missense_variant,,ENSMMUT00000039936,;	T	ENSMMUG00000016346	ENSMMUT00000039936	Transcript	missense_variant	1404	1157	386	W/L	tGg/tTg				1	ARHGAP5	VGNC		protein_coding	YES		ENSMMUP00000032997		F7D700.59	UPI001235555F	2/8		PROSITE_profiles:PS51676,PANTHER:PTHR46005,PANTHER:PTHR46005:SF2,SMART:SM00441	MODERATE
ARHGAP5	Mmul_10	7	94166046	94166046	+	Missense_Mutation	SNP	C	C	A	novel	17857	NORMAL	C	C	ENSMMUT00000039936	2/8	29	25	4	ARHGAP5,missense_variant,,ENSMMUT00000039936,;	A	ENSMMUG00000016346	ENSMMUT00000039936	Transcript	missense_variant	1460	1213	405	L/M	Ctg/Atg				1	ARHGAP5	VGNC		protein_coding	YES		ENSMMUP00000032997		F7D700.59	UPI001235555F	2/8		PROSITE_profiles:PS51676,PANTHER:PTHR46005,PANTHER:PTHR46005:SF2,SMART:SM00441	MODERATE
ARHGAP5	Mmul_10	7	94166046	94166046	+	Missense_Mutation	SNP	C	C	G	rs1082155961	17573	NORMAL	C	C	ENSMMUT00000039936	2/8	24	18	6	ARHGAP5,missense_variant,,ENSMMUT00000039936,;	G	ENSMMUG00000016346	ENSMMUT00000039936	Transcript	missense_variant	1460	1213	405	L/V	Ctg/Gtg	rs1082155961			1	ARHGAP5	VGNC		protein_coding	YES		ENSMMUP00000032997		F7D700.59	UPI001235555F	2/8		PROSITE_profiles:PS51676,PANTHER:PTHR46005,PANTHER:PTHR46005:SF2,SMART:SM00441	MODERATE
ARHGAP5	Mmul_10	7	94166046	94166046	+	Missense_Mutation	SNP	C	C	G	rs1082155961	17745	NORMAL	C	C	ENSMMUT00000039936	2/8	25	21	4	ARHGAP5,missense_variant,,ENSMMUT00000039936,;	G	ENSMMUG00000016346	ENSMMUT00000039936	Transcript	missense_variant	1460	1213	405	L/V	Ctg/Gtg	rs1082155961			1	ARHGAP5	VGNC		protein_coding	YES		ENSMMUP00000032997		F7D700.59	UPI001235555F	2/8		PROSITE_profiles:PS51676,PANTHER:PTHR46005,PANTHER:PTHR46005:SF2,SMART:SM00441	MODERATE
ARHGAP5	Mmul_10	7	94166046	94166046	+	Missense_Mutation	SNP	C	C	G	rs1082155961	17874	NORMAL	C	C	ENSMMUT00000039936	2/8	26	21	5	ARHGAP5,missense_variant,,ENSMMUT00000039936,;	G	ENSMMUG00000016346	ENSMMUT00000039936	Transcript	missense_variant	1460	1213	405	L/V	Ctg/Gtg	rs1082155961			1	ARHGAP5	VGNC		protein_coding	YES		ENSMMUP00000032997		F7D700.59	UPI001235555F	2/8		PROSITE_profiles:PS51676,PANTHER:PTHR46005,PANTHER:PTHR46005:SF2,SMART:SM00441	MODERATE
ARHGAP5	Mmul_10	7	94166046	94166046	+	Missense_Mutation	SNP	C	C	G	rs1082155961	17944	NORMAL	C	C	ENSMMUT00000039936	2/8	33	27	6	ARHGAP5,missense_variant,,ENSMMUT00000039936,;	G	ENSMMUG00000016346	ENSMMUT00000039936	Transcript	missense_variant	1460	1213	405	L/V	Ctg/Gtg	rs1082155961			1	ARHGAP5	VGNC		protein_coding	YES		ENSMMUP00000032997		F7D700.59	UPI001235555F	2/8		PROSITE_profiles:PS51676,PANTHER:PTHR46005,PANTHER:PTHR46005:SF2,SMART:SM00441	MODERATE
ARHGAP5	Mmul_10	7	94166046	94166046	+	Missense_Mutation	SNP	C	C	G	rs1082155961	18087	NORMAL	C	C	ENSMMUT00000039936	2/8	33	28	5	ARHGAP5,missense_variant,,ENSMMUT00000039936,;	G	ENSMMUG00000016346	ENSMMUT00000039936	Transcript	missense_variant	1460	1213	405	L/V	Ctg/Gtg	rs1082155961			1	ARHGAP5	VGNC		protein_coding	YES		ENSMMUP00000032997		F7D700.59	UPI001235555F	2/8		PROSITE_profiles:PS51676,PANTHER:PTHR46005,PANTHER:PTHR46005:SF2,SMART:SM00441	MODERATE
ARHGAP5	Mmul_10	7	94166046	94166046	+	Missense_Mutation	SNP	C	C	G	rs1082155961	18098	NORMAL	C	C	ENSMMUT00000039936	2/8	36	26	10	ARHGAP5,missense_variant,,ENSMMUT00000039936,;	G	ENSMMUG00000016346	ENSMMUT00000039936	Transcript	missense_variant	1460	1213	405	L/V	Ctg/Gtg	rs1082155961			1	ARHGAP5	VGNC		protein_coding	YES		ENSMMUP00000032997		F7D700.59	UPI001235555F	2/8		PROSITE_profiles:PS51676,PANTHER:PTHR46005,PANTHER:PTHR46005:SF2,SMART:SM00441	MODERATE
ARHGAP5	Mmul_10	7	94166046	94166046	+	Missense_Mutation	SNP	C	C	G	rs1082155961	18147	NORMAL	C	C	ENSMMUT00000039936	2/8	30	26	4	ARHGAP5,missense_variant,,ENSMMUT00000039936,;	G	ENSMMUG00000016346	ENSMMUT00000039936	Transcript	missense_variant	1460	1213	405	L/V	Ctg/Gtg	rs1082155961			1	ARHGAP5	VGNC		protein_coding	YES		ENSMMUP00000032997		F7D700.59	UPI001235555F	2/8		PROSITE_profiles:PS51676,PANTHER:PTHR46005,PANTHER:PTHR46005:SF2,SMART:SM00441	MODERATE
ARHGAP5	Mmul_10	7	94166046	94166046	+	Missense_Mutation	SNP	C	C	G	rs1082155961	18167	NORMAL	C	C	ENSMMUT00000039936	2/8	32	24	8	ARHGAP5,missense_variant,,ENSMMUT00000039936,;	G	ENSMMUG00000016346	ENSMMUT00000039936	Transcript	missense_variant	1460	1213	405	L/V	Ctg/Gtg	rs1082155961			1	ARHGAP5	VGNC		protein_coding	YES		ENSMMUP00000032997		F7D700.59	UPI001235555F	2/8		PROSITE_profiles:PS51676,PANTHER:PTHR46005,PANTHER:PTHR46005:SF2,SMART:SM00441	MODERATE
ARHGAP5	Mmul_10	7	94166046	94166046	+	Missense_Mutation	SNP	C	C	G	rs1082155961	18200	NORMAL	C	C	ENSMMUT00000039936	2/8	28	23	5	ARHGAP5,missense_variant,,ENSMMUT00000039936,;	G	ENSMMUG00000016346	ENSMMUT00000039936	Transcript	missense_variant	1460	1213	405	L/V	Ctg/Gtg	rs1082155961			1	ARHGAP5	VGNC		protein_coding	YES		ENSMMUP00000032997		F7D700.59	UPI001235555F	2/8		PROSITE_profiles:PS51676,PANTHER:PTHR46005,PANTHER:PTHR46005:SF2,SMART:SM00441	MODERATE
ARHGAP5	Mmul_10	7	94166046	94166046	+	Missense_Mutation	SNP	C	C	G	rs1082155961	18201	NORMAL	C	C	ENSMMUT00000039936	2/8	30	23	7	ARHGAP5,missense_variant,,ENSMMUT00000039936,;	G	ENSMMUG00000016346	ENSMMUT00000039936	Transcript	missense_variant	1460	1213	405	L/V	Ctg/Gtg	rs1082155961			1	ARHGAP5	VGNC		protein_coding	YES		ENSMMUP00000032997		F7D700.59	UPI001235555F	2/8		PROSITE_profiles:PS51676,PANTHER:PTHR46005,PANTHER:PTHR46005:SF2,SMART:SM00441	MODERATE
ARHGAP5	Mmul_10	7	94166046	94166046	+	Missense_Mutation	SNP	C	C	G	rs1082155961	21742	NORMAL	C	C	ENSMMUT00000039936	2/8	34	28	6	ARHGAP5,missense_variant,,ENSMMUT00000039936,;	G	ENSMMUG00000016346	ENSMMUT00000039936	Transcript	missense_variant	1460	1213	405	L/V	Ctg/Gtg	rs1082155961			1	ARHGAP5	VGNC		protein_coding	YES		ENSMMUP00000032997		F7D700.59	UPI001235555F	2/8		PROSITE_profiles:PS51676,PANTHER:PTHR46005,PANTHER:PTHR46005:SF2,SMART:SM00441	MODERATE
ARHGAP5	Mmul_10	7	94166046	94166046	+	Missense_Mutation	SNP	C	C	G	rs1082155961	22256	NORMAL	C	C	ENSMMUT00000039936	2/8	35	29	6	ARHGAP5,missense_variant,,ENSMMUT00000039936,;	G	ENSMMUG00000016346	ENSMMUT00000039936	Transcript	missense_variant	1460	1213	405	L/V	Ctg/Gtg	rs1082155961			1	ARHGAP5	VGNC		protein_coding	YES		ENSMMUP00000032997		F7D700.59	UPI001235555F	2/8		PROSITE_profiles:PS51676,PANTHER:PTHR46005,PANTHER:PTHR46005:SF2,SMART:SM00441	MODERATE
ARHGAP5	Mmul_10	7	94166046	94166046	+	Missense_Mutation	SNP	C	C	G	rs1082155961	22435	NORMAL	C	C	ENSMMUT00000039936	2/8	37	31	6	ARHGAP5,missense_variant,,ENSMMUT00000039936,;	G	ENSMMUG00000016346	ENSMMUT00000039936	Transcript	missense_variant	1460	1213	405	L/V	Ctg/Gtg	rs1082155961			1	ARHGAP5	VGNC		protein_coding	YES		ENSMMUP00000032997		F7D700.59	UPI001235555F	2/8		PROSITE_profiles:PS51676,PANTHER:PTHR46005,PANTHER:PTHR46005:SF2,SMART:SM00441	MODERATE
ARHGAP5	Mmul_10	7	94166046	94166046	+	Missense_Mutation	SNP	C	C	G	rs1082155961	22523	NORMAL	C	C	ENSMMUT00000039936	2/8	24	18	6	ARHGAP5,missense_variant,,ENSMMUT00000039936,;	G	ENSMMUG00000016346	ENSMMUT00000039936	Transcript	missense_variant	1460	1213	405	L/V	Ctg/Gtg	rs1082155961			1	ARHGAP5	VGNC		protein_coding	YES		ENSMMUP00000032997		F7D700.59	UPI001235555F	2/8		PROSITE_profiles:PS51676,PANTHER:PTHR46005,PANTHER:PTHR46005:SF2,SMART:SM00441	MODERATE
ARHGAP5	Mmul_10	7	94166046	94166046	+	Missense_Mutation	SNP	C	C	G	rs1082155961	23001	NORMAL	C	C	ENSMMUT00000039936	2/8	20	16	4	ARHGAP5,missense_variant,,ENSMMUT00000039936,;	G	ENSMMUG00000016346	ENSMMUT00000039936	Transcript	missense_variant	1460	1213	405	L/V	Ctg/Gtg	rs1082155961			1	ARHGAP5	VGNC		protein_coding	YES		ENSMMUP00000032997		F7D700.59	UPI001235555F	2/8		PROSITE_profiles:PS51676,PANTHER:PTHR46005,PANTHER:PTHR46005:SF2,SMART:SM00441	MODERATE
ARHGAP5	Mmul_10	7	94166046	94166046	+	Missense_Mutation	SNP	C	C	G	rs1082155961	23903	NORMAL	C	C	ENSMMUT00000039936	2/8	35	25	10	ARHGAP5,missense_variant,,ENSMMUT00000039936,;	G	ENSMMUG00000016346	ENSMMUT00000039936	Transcript	missense_variant	1460	1213	405	L/V	Ctg/Gtg	rs1082155961			1	ARHGAP5	VGNC		protein_coding	YES		ENSMMUP00000032997		F7D700.59	UPI001235555F	2/8		PROSITE_profiles:PS51676,PANTHER:PTHR46005,PANTHER:PTHR46005:SF2,SMART:SM00441	MODERATE
ARHGAP5	Mmul_10	7	94166046	94166046	+	Missense_Mutation	SNP	C	C	G	rs1082155961	25891	NORMAL	C	C	ENSMMUT00000039936	2/8	26	20	6	ARHGAP5,missense_variant,,ENSMMUT00000039936,;	G	ENSMMUG00000016346	ENSMMUT00000039936	Transcript	missense_variant	1460	1213	405	L/V	Ctg/Gtg	rs1082155961			1	ARHGAP5	VGNC		protein_coding	YES		ENSMMUP00000032997		F7D700.59	UPI001235555F	2/8		PROSITE_profiles:PS51676,PANTHER:PTHR46005,PANTHER:PTHR46005:SF2,SMART:SM00441	MODERATE
ARHGAP5	Mmul_10	7	94166046	94166046	+	Missense_Mutation	SNP	C	C	G	rs1082155961	26537	NORMAL	C	C	ENSMMUT00000039936	2/8	26	22	4	ARHGAP5,missense_variant,,ENSMMUT00000039936,;	G	ENSMMUG00000016346	ENSMMUT00000039936	Transcript	missense_variant	1460	1213	405	L/V	Ctg/Gtg	rs1082155961			1	ARHGAP5	VGNC		protein_coding	YES		ENSMMUP00000032997		F7D700.59	UPI001235555F	2/8		PROSITE_profiles:PS51676,PANTHER:PTHR46005,PANTHER:PTHR46005:SF2,SMART:SM00441	MODERATE
ARHGAP5	Mmul_10	7	94166046	94166046	+	Missense_Mutation	SNP	C	C	G	rs1082155961	27515	NORMAL	C	C	ENSMMUT00000039936	2/8	21	18	3	ARHGAP5,missense_variant,,ENSMMUT00000039936,;	G	ENSMMUG00000016346	ENSMMUT00000039936	Transcript	missense_variant	1460	1213	405	L/V	Ctg/Gtg	rs1082155961			1	ARHGAP5	VGNC		protein_coding	YES		ENSMMUP00000032997		F7D700.59	UPI001235555F	2/8		PROSITE_profiles:PS51676,PANTHER:PTHR46005,PANTHER:PTHR46005:SF2,SMART:SM00441	MODERATE
ARHGAP5	Mmul_10	7	94166046	94166046	+	Missense_Mutation	SNP	C	C	G	rs1082155961	27516	NORMAL	C	C	ENSMMUT00000039936	2/8	22	15	7	ARHGAP5,missense_variant,,ENSMMUT00000039936,;	G	ENSMMUG00000016346	ENSMMUT00000039936	Transcript	missense_variant	1460	1213	405	L/V	Ctg/Gtg	rs1082155961			1	ARHGAP5	VGNC		protein_coding	YES		ENSMMUP00000032997		F7D700.59	UPI001235555F	2/8		PROSITE_profiles:PS51676,PANTHER:PTHR46005,PANTHER:PTHR46005:SF2,SMART:SM00441	MODERATE
ARHGAP5	Mmul_10	7	94166046	94166046	+	Missense_Mutation	SNP	C	C	G	rs1082155961	30325	NORMAL	C	C	ENSMMUT00000039936	2/8	24	17	7	ARHGAP5,missense_variant,,ENSMMUT00000039936,;	G	ENSMMUG00000016346	ENSMMUT00000039936	Transcript	missense_variant	1460	1213	405	L/V	Ctg/Gtg	rs1082155961			1	ARHGAP5	VGNC		protein_coding	YES		ENSMMUP00000032997		F7D700.59	UPI001235555F	2/8		PROSITE_profiles:PS51676,PANTHER:PTHR46005,PANTHER:PTHR46005:SF2,SMART:SM00441	MODERATE
ARHGAP5	Mmul_10	7	94166308	94166308	+	Missense_Mutation	SNP	A	A	T	novel	17857	NORMAL	A	A	ENSMMUT00000039936	3/8	22	19	3	ARHGAP5,missense_variant,,ENSMMUT00000039936,;	T	ENSMMUG00000016346	ENSMMUT00000039936	Transcript	missense_variant	1721	1474	492	M/L	Atg/Ttg				1	ARHGAP5	VGNC		protein_coding	YES		ENSMMUP00000032997		F7D700.59	UPI001235555F	3/8		Gene3D:1.10.10.440,Pfam:PF01846,PROSITE_profiles:PS51676,PANTHER:PTHR46005,PANTHER:PTHR46005:SF2,SMART:SM00441	MODERATE
ARHGAP5	Mmul_10	7	94166308	94166308	+	Missense_Mutation	SNP	A	A	T	novel	18201	NORMAL	A	A	ENSMMUT00000039936	3/8	19	16	3	ARHGAP5,missense_variant,,ENSMMUT00000039936,;	T	ENSMMUG00000016346	ENSMMUT00000039936	Transcript	missense_variant	1721	1474	492	M/L	Atg/Ttg				1	ARHGAP5	VGNC		protein_coding	YES		ENSMMUP00000032997		F7D700.59	UPI001235555F	3/8		Gene3D:1.10.10.440,Pfam:PF01846,PROSITE_profiles:PS51676,PANTHER:PTHR46005,PANTHER:PTHR46005:SF2,SMART:SM00441	MODERATE
ARHGAP5	Mmul_10	7	94166375	94166375	+	Missense_Mutation	SNP	T	T	A	novel	18100	NORMAL	T	T	ENSMMUT00000039936	3/8	24	21	3	ARHGAP5,missense_variant,,ENSMMUT00000039936,;	A	ENSMMUG00000016346	ENSMMUT00000039936	Transcript	missense_variant	1788	1541	514	M/K	aTg/aAg				1	ARHGAP5	VGNC		protein_coding	YES		ENSMMUP00000032997		F7D700.59	UPI001235555F	3/8		Gene3D:1.10.10.440,Pfam:PF01846,PROSITE_profiles:PS51676,PANTHER:PTHR46005,PANTHER:PTHR46005:SF2,SMART:SM00441	MODERATE
ARHGAP5	Mmul_10	7	94166375	94166375	+	Missense_Mutation	SNP	T	T	A	novel	30325	NORMAL	T	T	ENSMMUT00000039936	3/8	24	21	3	ARHGAP5,missense_variant,,ENSMMUT00000039936,;	A	ENSMMUG00000016346	ENSMMUT00000039936	Transcript	missense_variant	1788	1541	514	M/K	aTg/aAg				1	ARHGAP5	VGNC		protein_coding	YES		ENSMMUP00000032997		F7D700.59	UPI001235555F	3/8		Gene3D:1.10.10.440,Pfam:PF01846,PROSITE_profiles:PS51676,PANTHER:PTHR46005,PANTHER:PTHR46005:SF2,SMART:SM00441	MODERATE
ARHGAP5	Mmul_10	7	94166377	94166377	+	Missense_Mutation	SNP	A	A	C	rs1083871160	18100	NORMAL	A	A	ENSMMUT00000039936	3/8	24	21	3	ARHGAP5,missense_variant,,ENSMMUT00000039936,;	C	ENSMMUG00000016346	ENSMMUT00000039936	Transcript	missense_variant	1790	1543	515	S/R	Agt/Cgt	rs1083871160			1	ARHGAP5	VGNC		protein_coding	YES		ENSMMUP00000032997		F7D700.59	UPI001235555F	3/8		Gene3D:1.10.10.440,Pfam:PF01846,PROSITE_profiles:PS51676,PANTHER:PTHR46005,PANTHER:PTHR46005:SF2,SMART:SM00441	MODERATE
ARHGAP5	Mmul_10	7	94166377	94166377	+	Missense_Mutation	SNP	A	A	C	rs1083871160	30325	NORMAL	A	A	ENSMMUT00000039936	3/8	24	21	3	ARHGAP5,missense_variant,,ENSMMUT00000039936,;	C	ENSMMUG00000016346	ENSMMUT00000039936	Transcript	missense_variant	1790	1543	515	S/R	Agt/Cgt	rs1083871160			1	ARHGAP5	VGNC		protein_coding	YES		ENSMMUP00000032997		F7D700.59	UPI001235555F	3/8		Gene3D:1.10.10.440,Pfam:PF01846,PROSITE_profiles:PS51676,PANTHER:PTHR46005,PANTHER:PTHR46005:SF2,SMART:SM00441	MODERATE
ARHGAP5	Mmul_10	7	94166410	94166410	+	Missense_Mutation	SNP	A	A	G	novel	18133	NORMAL	A	A	ENSMMUT00000039936	3/8	26	22	4	ARHGAP5,missense_variant,,ENSMMUT00000039936,;	G	ENSMMUG00000016346	ENSMMUT00000039936	Transcript	missense_variant	1823	1576	526	R/G	Aga/Gga				1	ARHGAP5	VGNC		protein_coding	YES		ENSMMUP00000032997		F7D700.59	UPI001235555F	3/8		Gene3D:1.10.10.440,Pfam:PF01846,PROSITE_profiles:PS51676,PANTHER:PTHR46005,PANTHER:PTHR46005:SF2,SMART:SM00441	MODERATE
ARHGAP5	Mmul_10	7	94168075	94168075	+	Missense_Mutation	SNP	C	C	G	rs1067859308	18110	NORMAL	C	C	ENSMMUT00000039936	3/8	26	16	10	ARHGAP5,missense_variant,,ENSMMUT00000039936,;	G	ENSMMUG00000016346	ENSMMUT00000039936	Transcript	missense_variant	3488	3241	1081	P/A	Cct/Gct	rs1067859308			1	ARHGAP5	VGNC		protein_coding	YES		ENSMMUP00000032997		F7D700.59	UPI001235555F	3/8		PANTHER:PTHR46005,PANTHER:PTHR46005:SF2	MODERATE
ARHGAP5	Mmul_10	7	94168075	94168075	+	Missense_Mutation	SNP	C	C	G	rs1067859308	26851	NORMAL	C	C	ENSMMUT00000039936	3/8	12	4	8	ARHGAP5,missense_variant,,ENSMMUT00000039936,;	G	ENSMMUG00000016346	ENSMMUT00000039936	Transcript	missense_variant	3488	3241	1081	P/A	Cct/Gct	rs1067859308			1	ARHGAP5	VGNC		protein_coding	YES		ENSMMUP00000032997		F7D700.59	UPI001235555F	3/8		PANTHER:PTHR46005,PANTHER:PTHR46005:SF2	MODERATE
ARHGAP5	Mmul_10	7	94168075	94168075	+	Missense_Mutation	SNP	C	C	G	rs1067859308	30325	NORMAL	C	C	ENSMMUT00000039936	3/8	18	8	10	ARHGAP5,missense_variant,,ENSMMUT00000039936,;	G	ENSMMUG00000016346	ENSMMUT00000039936	Transcript	missense_variant	3488	3241	1081	P/A	Cct/Gct	rs1067859308			1	ARHGAP5	VGNC		protein_coding	YES		ENSMMUP00000032997		F7D700.59	UPI001235555F	3/8		PANTHER:PTHR46005,PANTHER:PTHR46005:SF2	MODERATE
ARHGAP5	Mmul_10	7	94216999	94216999	+	Missense_Mutation	SNP	C	C	T	novel	17573	NORMAL	C	C	ENSMMUT00000039936	7/8	23	12	11	ARHGAP5,missense_variant,,ENSMMUT00000039936,;	T	ENSMMUG00000016346	ENSMMUT00000039936	Transcript	missense_variant	4340	4093	1365	R/C	Cgt/Tgt				1	ARHGAP5	VGNC		protein_coding	YES		ENSMMUP00000032997		F7D700.59	UPI001235555F	7/8		Gene3D:1.10.555.10,Pfam:PF00620,PROSITE_profiles:PS50238,PANTHER:PTHR46005,PANTHER:PTHR46005:SF2,SMART:SM00324,Superfamily:SSF48350,CDD:cd04373	MODERATE
ARHGEF10	Mmul_10	8	2365928	2365928	+	Missense_Mutation	SNP	A	A	G	rs291544365	17694	NORMAL	A	A	ENSMMUT00000082410	5/30	24	13	11	ARHGEF10,missense_variant,,ENSMMUT00000013221,;ARHGEF10,missense_variant,,ENSMMUT00000013222,;ARHGEF10,missense_variant,,ENSMMUT00000061434,;ARHGEF10,missense_variant,,ENSMMUT00000063057,;ARHGEF10,missense_variant,,ENSMMUT00000082410,;ARHGEF10,missense_variant,,ENSMMUT00000085940,;ARHGEF10,missense_variant,,ENSMMUT00000100808,;ARHGEF10,missense_variant,,ENSMMUT00000101599,;ARHGEF10,missense_varia…	G	ENSMMUG00000009472	ENSMMUT00000082410	Transcript	missense_variant	1065	217	73	K/E	Aaa/Gaa	rs291544365			1	ARHGEF10	VGNC		protein_coding	YES		ENSMMUP00000081193		A0A5F8A896.6	UPI0010A22289	5/30		PANTHER:PTHR12877,PANTHER:PTHR12877:SF14,MobiDB_lite:mobidb-lite	MODERATE
ARHGEF10	Mmul_10	8	2365928	2365928	+	Missense_Mutation	SNP	A	A	G	rs291544365	17857	NORMAL	A	A	ENSMMUT00000082410	5/30	35	21	14	ARHGEF10,missense_variant,,ENSMMUT00000013221,;ARHGEF10,missense_variant,,ENSMMUT00000013222,;ARHGEF10,missense_variant,,ENSMMUT00000061434,;ARHGEF10,missense_variant,,ENSMMUT00000063057,;ARHGEF10,missense_variant,,ENSMMUT00000082410,;ARHGEF10,missense_variant,,ENSMMUT00000085940,;ARHGEF10,missense_variant,,ENSMMUT00000100808,;ARHGEF10,missense_variant,,ENSMMUT00000101599,;ARHGEF10,missense_varia…	G	ENSMMUG00000009472	ENSMMUT00000082410	Transcript	missense_variant	1065	217	73	K/E	Aaa/Gaa	rs291544365			1	ARHGEF10	VGNC		protein_coding	YES		ENSMMUP00000081193		A0A5F8A896.6	UPI0010A22289	5/30		PANTHER:PTHR12877,PANTHER:PTHR12877:SF14,MobiDB_lite:mobidb-lite	MODERATE
ARHGEF10	Mmul_10	8	2365928	2365928	+	Missense_Mutation	SNP	A	A	G	rs291544365	17874	NORMAL	A	A	ENSMMUT00000082410	5/30	38	19	19	ARHGEF10,missense_variant,,ENSMMUT00000013221,;ARHGEF10,missense_variant,,ENSMMUT00000013222,;ARHGEF10,missense_variant,,ENSMMUT00000061434,;ARHGEF10,missense_variant,,ENSMMUT00000063057,;ARHGEF10,missense_variant,,ENSMMUT00000082410,;ARHGEF10,missense_variant,,ENSMMUT00000085940,;ARHGEF10,missense_variant,,ENSMMUT00000100808,;ARHGEF10,missense_variant,,ENSMMUT00000101599,;ARHGEF10,missense_varia…	G	ENSMMUG00000009472	ENSMMUT00000082410	Transcript	missense_variant	1065	217	73	K/E	Aaa/Gaa	rs291544365			1	ARHGEF10	VGNC		protein_coding	YES		ENSMMUP00000081193		A0A5F8A896.6	UPI0010A22289	5/30		PANTHER:PTHR12877,PANTHER:PTHR12877:SF14,MobiDB_lite:mobidb-lite	MODERATE
ARHGEF10	Mmul_10	8	2365928	2365928	+	Missense_Mutation	SNP	A	A	G	rs291544365	17944	NORMAL	A	A	ENSMMUT00000082410	5/30	22	8	14	ARHGEF10,missense_variant,,ENSMMUT00000013221,;ARHGEF10,missense_variant,,ENSMMUT00000013222,;ARHGEF10,missense_variant,,ENSMMUT00000061434,;ARHGEF10,missense_variant,,ENSMMUT00000063057,;ARHGEF10,missense_variant,,ENSMMUT00000082410,;ARHGEF10,missense_variant,,ENSMMUT00000085940,;ARHGEF10,missense_variant,,ENSMMUT00000100808,;ARHGEF10,missense_variant,,ENSMMUT00000101599,;ARHGEF10,missense_varia…	G	ENSMMUG00000009472	ENSMMUT00000082410	Transcript	missense_variant	1065	217	73	K/E	Aaa/Gaa	rs291544365			1	ARHGEF10	VGNC		protein_coding	YES		ENSMMUP00000081193		A0A5F8A896.6	UPI0010A22289	5/30		PANTHER:PTHR12877,PANTHER:PTHR12877:SF14,MobiDB_lite:mobidb-lite	MODERATE
ARHGEF10	Mmul_10	8	2365928	2365928	+	Missense_Mutation	SNP	A	A	G	rs291544365	17979	NORMAL	A	A	ENSMMUT00000082410	5/30	31	10	21	ARHGEF10,missense_variant,,ENSMMUT00000013221,;ARHGEF10,missense_variant,,ENSMMUT00000013222,;ARHGEF10,missense_variant,,ENSMMUT00000061434,;ARHGEF10,missense_variant,,ENSMMUT00000063057,;ARHGEF10,missense_variant,,ENSMMUT00000082410,;ARHGEF10,missense_variant,,ENSMMUT00000085940,;ARHGEF10,missense_variant,,ENSMMUT00000100808,;ARHGEF10,missense_variant,,ENSMMUT00000101599,;ARHGEF10,missense_varia…	G	ENSMMUG00000009472	ENSMMUT00000082410	Transcript	missense_variant	1065	217	73	K/E	Aaa/Gaa	rs291544365			1	ARHGEF10	VGNC		protein_coding	YES		ENSMMUP00000081193		A0A5F8A896.6	UPI0010A22289	5/30		PANTHER:PTHR12877,PANTHER:PTHR12877:SF14,MobiDB_lite:mobidb-lite	MODERATE
ARHGEF10	Mmul_10	8	2365928	2365928	+	Missense_Mutation	SNP	A	A	G	rs291544365	18057	NORMAL	A	A	ENSMMUT00000082410	5/30	41	21	20	ARHGEF10,missense_variant,,ENSMMUT00000013221,;ARHGEF10,missense_variant,,ENSMMUT00000013222,;ARHGEF10,missense_variant,,ENSMMUT00000061434,;ARHGEF10,missense_variant,,ENSMMUT00000063057,;ARHGEF10,missense_variant,,ENSMMUT00000082410,;ARHGEF10,missense_variant,,ENSMMUT00000085940,;ARHGEF10,missense_variant,,ENSMMUT00000100808,;ARHGEF10,missense_variant,,ENSMMUT00000101599,;ARHGEF10,missense_varia…	G	ENSMMUG00000009472	ENSMMUT00000082410	Transcript	missense_variant	1065	217	73	K/E	Aaa/Gaa	rs291544365			1	ARHGEF10	VGNC		protein_coding	YES		ENSMMUP00000081193		A0A5F8A896.6	UPI0010A22289	5/30		PANTHER:PTHR12877,PANTHER:PTHR12877:SF14,MobiDB_lite:mobidb-lite	MODERATE
ARHGEF10	Mmul_10	8	2365928	2365928	+	Missense_Mutation	SNP	A	A	G	rs291544365	18110	NORMAL	A	A	ENSMMUT00000082410	5/30	32	12	20	ARHGEF10,missense_variant,,ENSMMUT00000013221,;ARHGEF10,missense_variant,,ENSMMUT00000013222,;ARHGEF10,missense_variant,,ENSMMUT00000061434,;ARHGEF10,missense_variant,,ENSMMUT00000063057,;ARHGEF10,missense_variant,,ENSMMUT00000082410,;ARHGEF10,missense_variant,,ENSMMUT00000085940,;ARHGEF10,missense_variant,,ENSMMUT00000100808,;ARHGEF10,missense_variant,,ENSMMUT00000101599,;ARHGEF10,missense_varia…	G	ENSMMUG00000009472	ENSMMUT00000082410	Transcript	missense_variant	1065	217	73	K/E	Aaa/Gaa	rs291544365			1	ARHGEF10	VGNC		protein_coding	YES		ENSMMUP00000081193		A0A5F8A896.6	UPI0010A22289	5/30		PANTHER:PTHR12877,PANTHER:PTHR12877:SF14,MobiDB_lite:mobidb-lite	MODERATE
ARHGEF10	Mmul_10	8	2365928	2365928	+	Missense_Mutation	SNP	A	A	G	rs291544365	18113	NORMAL	A	A	ENSMMUT00000082410	5/30	38	14	24	ARHGEF10,missense_variant,,ENSMMUT00000013221,;ARHGEF10,missense_variant,,ENSMMUT00000013222,;ARHGEF10,missense_variant,,ENSMMUT00000061434,;ARHGEF10,missense_variant,,ENSMMUT00000063057,;ARHGEF10,missense_variant,,ENSMMUT00000082410,;ARHGEF10,missense_variant,,ENSMMUT00000085940,;ARHGEF10,missense_variant,,ENSMMUT00000100808,;ARHGEF10,missense_variant,,ENSMMUT00000101599,;ARHGEF10,missense_varia…	G	ENSMMUG00000009472	ENSMMUT00000082410	Transcript	missense_variant	1065	217	73	K/E	Aaa/Gaa	rs291544365			1	ARHGEF10	VGNC		protein_coding	YES		ENSMMUP00000081193		A0A5F8A896.6	UPI0010A22289	5/30		PANTHER:PTHR12877,PANTHER:PTHR12877:SF14,MobiDB_lite:mobidb-lite	MODERATE
ARHGEF10	Mmul_10	8	2365928	2365928	+	Missense_Mutation	SNP	A	A	G	rs291544365	18167	NORMAL	A	A	ENSMMUT00000082410	5/30	29	13	16	ARHGEF10,missense_variant,,ENSMMUT00000013221,;ARHGEF10,missense_variant,,ENSMMUT00000013222,;ARHGEF10,missense_variant,,ENSMMUT00000061434,;ARHGEF10,missense_variant,,ENSMMUT00000063057,;ARHGEF10,missense_variant,,ENSMMUT00000082410,;ARHGEF10,missense_variant,,ENSMMUT00000085940,;ARHGEF10,missense_variant,,ENSMMUT00000100808,;ARHGEF10,missense_variant,,ENSMMUT00000101599,;ARHGEF10,missense_varia…	G	ENSMMUG00000009472	ENSMMUT00000082410	Transcript	missense_variant	1065	217	73	K/E	Aaa/Gaa	rs291544365			1	ARHGEF10	VGNC		protein_coding	YES		ENSMMUP00000081193		A0A5F8A896.6	UPI0010A22289	5/30		PANTHER:PTHR12877,PANTHER:PTHR12877:SF14,MobiDB_lite:mobidb-lite	MODERATE
ARHGEF10	Mmul_10	8	2365928	2365928	+	Missense_Mutation	SNP	A	A	G	rs291544365	18206	NORMAL	A	A	ENSMMUT00000082410	5/30	39	14	25	ARHGEF10,missense_variant,,ENSMMUT00000013221,;ARHGEF10,missense_variant,,ENSMMUT00000013222,;ARHGEF10,missense_variant,,ENSMMUT00000061434,;ARHGEF10,missense_variant,,ENSMMUT00000063057,;ARHGEF10,missense_variant,,ENSMMUT00000082410,;ARHGEF10,missense_variant,,ENSMMUT00000085940,;ARHGEF10,missense_variant,,ENSMMUT00000100808,;ARHGEF10,missense_variant,,ENSMMUT00000101599,;ARHGEF10,missense_varia…	G	ENSMMUG00000009472	ENSMMUT00000082410	Transcript	missense_variant	1065	217	73	K/E	Aaa/Gaa	rs291544365			1	ARHGEF10	VGNC		protein_coding	YES		ENSMMUP00000081193		A0A5F8A896.6	UPI0010A22289	5/30		PANTHER:PTHR12877,PANTHER:PTHR12877:SF14,MobiDB_lite:mobidb-lite	MODERATE
ARHGEF10	Mmul_10	8	2365928	2365928	+	Missense_Mutation	SNP	A	A	G	rs291544365	18210	NORMAL	A	A	ENSMMUT00000082410	5/30	27	10	17	ARHGEF10,missense_variant,,ENSMMUT00000013221,;ARHGEF10,missense_variant,,ENSMMUT00000013222,;ARHGEF10,missense_variant,,ENSMMUT00000061434,;ARHGEF10,missense_variant,,ENSMMUT00000063057,;ARHGEF10,missense_variant,,ENSMMUT00000082410,;ARHGEF10,missense_variant,,ENSMMUT00000085940,;ARHGEF10,missense_variant,,ENSMMUT00000100808,;ARHGEF10,missense_variant,,ENSMMUT00000101599,;ARHGEF10,missense_varia…	G	ENSMMUG00000009472	ENSMMUT00000082410	Transcript	missense_variant	1065	217	73	K/E	Aaa/Gaa	rs291544365			1	ARHGEF10	VGNC		protein_coding	YES		ENSMMUP00000081193		A0A5F8A896.6	UPI0010A22289	5/30		PANTHER:PTHR12877,PANTHER:PTHR12877:SF14,MobiDB_lite:mobidb-lite	MODERATE
ARHGEF10	Mmul_10	8	2365928	2365928	+	Missense_Mutation	SNP	A	A	G	rs291544365	18216	NORMAL	A	A	ENSMMUT00000082410	5/30	35	21	14	ARHGEF10,missense_variant,,ENSMMUT00000013221,;ARHGEF10,missense_variant,,ENSMMUT00000013222,;ARHGEF10,missense_variant,,ENSMMUT00000061434,;ARHGEF10,missense_variant,,ENSMMUT00000063057,;ARHGEF10,missense_variant,,ENSMMUT00000082410,;ARHGEF10,missense_variant,,ENSMMUT00000085940,;ARHGEF10,missense_variant,,ENSMMUT00000100808,;ARHGEF10,missense_variant,,ENSMMUT00000101599,;ARHGEF10,missense_varia…	G	ENSMMUG00000009472	ENSMMUT00000082410	Transcript	missense_variant	1065	217	73	K/E	Aaa/Gaa	rs291544365			1	ARHGEF10	VGNC		protein_coding	YES		ENSMMUP00000081193		A0A5F8A896.6	UPI0010A22289	5/30		PANTHER:PTHR12877,PANTHER:PTHR12877:SF14,MobiDB_lite:mobidb-lite	MODERATE
ARHGEF10	Mmul_10	8	2365928	2365928	+	Missense_Mutation	SNP	A	A	G	rs291544365	22256	NORMAL	A	A	ENSMMUT00000082410	5/30	26	12	14	ARHGEF10,missense_variant,,ENSMMUT00000013221,;ARHGEF10,missense_variant,,ENSMMUT00000013222,;ARHGEF10,missense_variant,,ENSMMUT00000061434,;ARHGEF10,missense_variant,,ENSMMUT00000063057,;ARHGEF10,missense_variant,,ENSMMUT00000082410,;ARHGEF10,missense_variant,,ENSMMUT00000085940,;ARHGEF10,missense_variant,,ENSMMUT00000100808,;ARHGEF10,missense_variant,,ENSMMUT00000101599,;ARHGEF10,missense_varia…	G	ENSMMUG00000009472	ENSMMUT00000082410	Transcript	missense_variant	1065	217	73	K/E	Aaa/Gaa	rs291544365			1	ARHGEF10	VGNC		protein_coding	YES		ENSMMUP00000081193		A0A5F8A896.6	UPI0010A22289	5/30		PANTHER:PTHR12877,PANTHER:PTHR12877:SF14,MobiDB_lite:mobidb-lite	MODERATE
ARHGEF10	Mmul_10	8	2365928	2365928	+	Missense_Mutation	SNP	A	A	G	rs291544365	22523	NORMAL	A	A	ENSMMUT00000082410	5/30	21	11	10	ARHGEF10,missense_variant,,ENSMMUT00000013221,;ARHGEF10,missense_variant,,ENSMMUT00000013222,;ARHGEF10,missense_variant,,ENSMMUT00000061434,;ARHGEF10,missense_variant,,ENSMMUT00000063057,;ARHGEF10,missense_variant,,ENSMMUT00000082410,;ARHGEF10,missense_variant,,ENSMMUT00000085940,;ARHGEF10,missense_variant,,ENSMMUT00000100808,;ARHGEF10,missense_variant,,ENSMMUT00000101599,;ARHGEF10,missense_varia…	G	ENSMMUG00000009472	ENSMMUT00000082410	Transcript	missense_variant	1065	217	73	K/E	Aaa/Gaa	rs291544365			1	ARHGEF10	VGNC		protein_coding	YES		ENSMMUP00000081193		A0A5F8A896.6	UPI0010A22289	5/30		PANTHER:PTHR12877,PANTHER:PTHR12877:SF14,MobiDB_lite:mobidb-lite	MODERATE
ARHGEF10	Mmul_10	8	2365928	2365928	+	Missense_Mutation	SNP	A	A	G	rs291544365	26440	NORMAL	A	A	ENSMMUT00000082410	5/30	33	13	20	ARHGEF10,missense_variant,,ENSMMUT00000013221,;ARHGEF10,missense_variant,,ENSMMUT00000013222,;ARHGEF10,missense_variant,,ENSMMUT00000061434,;ARHGEF10,missense_variant,,ENSMMUT00000063057,;ARHGEF10,missense_variant,,ENSMMUT00000082410,;ARHGEF10,missense_variant,,ENSMMUT00000085940,;ARHGEF10,missense_variant,,ENSMMUT00000100808,;ARHGEF10,missense_variant,,ENSMMUT00000101599,;ARHGEF10,missense_varia…	G	ENSMMUG00000009472	ENSMMUT00000082410	Transcript	missense_variant	1065	217	73	K/E	Aaa/Gaa	rs291544365			1	ARHGEF10	VGNC		protein_coding	YES		ENSMMUP00000081193		A0A5F8A896.6	UPI0010A22289	5/30		PANTHER:PTHR12877,PANTHER:PTHR12877:SF14,MobiDB_lite:mobidb-lite	MODERATE
ARHGEF10	Mmul_10	8	2365928	2365928	+	Missense_Mutation	SNP	A	A	G	rs291544365	26537	NORMAL	A	A	ENSMMUT00000082410	5/30	24	13	11	ARHGEF10,missense_variant,,ENSMMUT00000013221,;ARHGEF10,missense_variant,,ENSMMUT00000013222,;ARHGEF10,missense_variant,,ENSMMUT00000061434,;ARHGEF10,missense_variant,,ENSMMUT00000063057,;ARHGEF10,missense_variant,,ENSMMUT00000082410,;ARHGEF10,missense_variant,,ENSMMUT00000085940,;ARHGEF10,missense_variant,,ENSMMUT00000100808,;ARHGEF10,missense_variant,,ENSMMUT00000101599,;ARHGEF10,missense_varia…	G	ENSMMUG00000009472	ENSMMUT00000082410	Transcript	missense_variant	1065	217	73	K/E	Aaa/Gaa	rs291544365			1	ARHGEF10	VGNC		protein_coding	YES		ENSMMUP00000081193		A0A5F8A896.6	UPI0010A22289	5/30		PANTHER:PTHR12877,PANTHER:PTHR12877:SF14,MobiDB_lite:mobidb-lite	MODERATE
ARHGEF10	Mmul_10	8	2365928	2365928	+	Missense_Mutation	SNP	A	A	G	rs291544365	26661	NORMAL	A	A	ENSMMUT00000082410	5/30	30	15	15	ARHGEF10,missense_variant,,ENSMMUT00000013221,;ARHGEF10,missense_variant,,ENSMMUT00000013222,;ARHGEF10,missense_variant,,ENSMMUT00000061434,;ARHGEF10,missense_variant,,ENSMMUT00000063057,;ARHGEF10,missense_variant,,ENSMMUT00000082410,;ARHGEF10,missense_variant,,ENSMMUT00000085940,;ARHGEF10,missense_variant,,ENSMMUT00000100808,;ARHGEF10,missense_variant,,ENSMMUT00000101599,;ARHGEF10,missense_varia…	G	ENSMMUG00000009472	ENSMMUT00000082410	Transcript	missense_variant	1065	217	73	K/E	Aaa/Gaa	rs291544365			1	ARHGEF10	VGNC		protein_coding	YES		ENSMMUP00000081193		A0A5F8A896.6	UPI0010A22289	5/30		PANTHER:PTHR12877,PANTHER:PTHR12877:SF14,MobiDB_lite:mobidb-lite	MODERATE
ARHGEF10	Mmul_10	8	2365928	2365928	+	Missense_Mutation	SNP	A	A	G	rs291544365	26851	NORMAL	A	A	ENSMMUT00000082410	5/30	20	12	8	ARHGEF10,missense_variant,,ENSMMUT00000013221,;ARHGEF10,missense_variant,,ENSMMUT00000013222,;ARHGEF10,missense_variant,,ENSMMUT00000061434,;ARHGEF10,missense_variant,,ENSMMUT00000063057,;ARHGEF10,missense_variant,,ENSMMUT00000082410,;ARHGEF10,missense_variant,,ENSMMUT00000085940,;ARHGEF10,missense_variant,,ENSMMUT00000100808,;ARHGEF10,missense_variant,,ENSMMUT00000101599,;ARHGEF10,missense_varia…	G	ENSMMUG00000009472	ENSMMUT00000082410	Transcript	missense_variant	1065	217	73	K/E	Aaa/Gaa	rs291544365			1	ARHGEF10	VGNC		protein_coding	YES		ENSMMUP00000081193		A0A5F8A896.6	UPI0010A22289	5/30		PANTHER:PTHR12877,PANTHER:PTHR12877:SF14,MobiDB_lite:mobidb-lite	MODERATE
ARHGEF10	Mmul_10	8	2365928	2365928	+	Missense_Mutation	SNP	A	A	G	rs291544365	27513	NORMAL	A	A	ENSMMUT00000082410	5/30	32	14	18	ARHGEF10,missense_variant,,ENSMMUT00000013221,;ARHGEF10,missense_variant,,ENSMMUT00000013222,;ARHGEF10,missense_variant,,ENSMMUT00000061434,;ARHGEF10,missense_variant,,ENSMMUT00000063057,;ARHGEF10,missense_variant,,ENSMMUT00000082410,;ARHGEF10,missense_variant,,ENSMMUT00000085940,;ARHGEF10,missense_variant,,ENSMMUT00000100808,;ARHGEF10,missense_variant,,ENSMMUT00000101599,;ARHGEF10,missense_varia…	G	ENSMMUG00000009472	ENSMMUT00000082410	Transcript	missense_variant	1065	217	73	K/E	Aaa/Gaa	rs291544365			1	ARHGEF10	VGNC		protein_coding	YES		ENSMMUP00000081193		A0A5F8A896.6	UPI0010A22289	5/30		PANTHER:PTHR12877,PANTHER:PTHR12877:SF14,MobiDB_lite:mobidb-lite	MODERATE
ARHGEF10	Mmul_10	8	2365928	2365928	+	Missense_Mutation	SNP	A	A	G	rs291544365	27516	NORMAL	A	A	ENSMMUT00000082410	5/30	20	8	12	ARHGEF10,missense_variant,,ENSMMUT00000013221,;ARHGEF10,missense_variant,,ENSMMUT00000013222,;ARHGEF10,missense_variant,,ENSMMUT00000061434,;ARHGEF10,missense_variant,,ENSMMUT00000063057,;ARHGEF10,missense_variant,,ENSMMUT00000082410,;ARHGEF10,missense_variant,,ENSMMUT00000085940,;ARHGEF10,missense_variant,,ENSMMUT00000100808,;ARHGEF10,missense_variant,,ENSMMUT00000101599,;ARHGEF10,missense_varia…	G	ENSMMUG00000009472	ENSMMUT00000082410	Transcript	missense_variant	1065	217	73	K/E	Aaa/Gaa	rs291544365			1	ARHGEF10	VGNC		protein_coding	YES		ENSMMUP00000081193		A0A5F8A896.6	UPI0010A22289	5/30		PANTHER:PTHR12877,PANTHER:PTHR12877:SF14,MobiDB_lite:mobidb-lite	MODERATE
ARHGEF10	Mmul_10	8	2365928	2365928	+	Missense_Mutation	SNP	A	A	G	rs291544365	27521	NORMAL	A	A	ENSMMUT00000082410	5/30	37	22	15	ARHGEF10,missense_variant,,ENSMMUT00000013221,;ARHGEF10,missense_variant,,ENSMMUT00000013222,;ARHGEF10,missense_variant,,ENSMMUT00000061434,;ARHGEF10,missense_variant,,ENSMMUT00000063057,;ARHGEF10,missense_variant,,ENSMMUT00000082410,;ARHGEF10,missense_variant,,ENSMMUT00000085940,;ARHGEF10,missense_variant,,ENSMMUT00000100808,;ARHGEF10,missense_variant,,ENSMMUT00000101599,;ARHGEF10,missense_varia…	G	ENSMMUG00000009472	ENSMMUT00000082410	Transcript	missense_variant	1065	217	73	K/E	Aaa/Gaa	rs291544365			1	ARHGEF10	VGNC		protein_coding	YES		ENSMMUP00000081193		A0A5F8A896.6	UPI0010A22289	5/30		PANTHER:PTHR12877,PANTHER:PTHR12877:SF14,MobiDB_lite:mobidb-lite	MODERATE
ARHGEF10	Mmul_10	8	2365928	2365928	+	Missense_Mutation	SNP	A	A	G	rs291544365	27536	NORMAL	A	A	ENSMMUT00000082410	5/30	25	19	6	ARHGEF10,missense_variant,,ENSMMUT00000013221,;ARHGEF10,missense_variant,,ENSMMUT00000013222,;ARHGEF10,missense_variant,,ENSMMUT00000061434,;ARHGEF10,missense_variant,,ENSMMUT00000063057,;ARHGEF10,missense_variant,,ENSMMUT00000082410,;ARHGEF10,missense_variant,,ENSMMUT00000085940,;ARHGEF10,missense_variant,,ENSMMUT00000100808,;ARHGEF10,missense_variant,,ENSMMUT00000101599,;ARHGEF10,missense_varia…	G	ENSMMUG00000009472	ENSMMUT00000082410	Transcript	missense_variant	1065	217	73	K/E	Aaa/Gaa	rs291544365			1	ARHGEF10	VGNC		protein_coding	YES		ENSMMUP00000081193		A0A5F8A896.6	UPI0010A22289	5/30		PANTHER:PTHR12877,PANTHER:PTHR12877:SF14,MobiDB_lite:mobidb-lite	MODERATE
ARHGEF10	Mmul_10	8	2365928	2365928	+	Missense_Mutation	SNP	A	A	G	rs291544365	30186	NORMAL	A	A	ENSMMUT00000082410	5/30	32	18	14	ARHGEF10,missense_variant,,ENSMMUT00000013221,;ARHGEF10,missense_variant,,ENSMMUT00000013222,;ARHGEF10,missense_variant,,ENSMMUT00000061434,;ARHGEF10,missense_variant,,ENSMMUT00000063057,;ARHGEF10,missense_variant,,ENSMMUT00000082410,;ARHGEF10,missense_variant,,ENSMMUT00000085940,;ARHGEF10,missense_variant,,ENSMMUT00000100808,;ARHGEF10,missense_variant,,ENSMMUT00000101599,;ARHGEF10,missense_varia…	G	ENSMMUG00000009472	ENSMMUT00000082410	Transcript	missense_variant	1065	217	73	K/E	Aaa/Gaa	rs291544365			1	ARHGEF10	VGNC		protein_coding	YES		ENSMMUP00000081193		A0A5F8A896.6	UPI0010A22289	5/30		PANTHER:PTHR12877,PANTHER:PTHR12877:SF14,MobiDB_lite:mobidb-lite	MODERATE
ARHGEF10	Mmul_10	8	2365931	2365931	+	Missense_Mutation	SNP	G	G	A	rs1081906873	17694	NORMAL	G	G	ENSMMUT00000082410	5/30	25	13	12	ARHGEF10,missense_variant,,ENSMMUT00000013221,;ARHGEF10,missense_variant,,ENSMMUT00000013222,;ARHGEF10,missense_variant,,ENSMMUT00000061434,;ARHGEF10,missense_variant,,ENSMMUT00000063057,;ARHGEF10,missense_variant,,ENSMMUT00000082410,;ARHGEF10,missense_variant,,ENSMMUT00000085940,;ARHGEF10,missense_variant,,ENSMMUT00000100808,;ARHGEF10,missense_variant,,ENSMMUT00000101599,;ARHGEF10,missense_varia…	A	ENSMMUG00000009472	ENSMMUT00000082410	Transcript	missense_variant	1068	220	74	A/T	Gcc/Acc	rs1081906873			1	ARHGEF10	VGNC		protein_coding	YES		ENSMMUP00000081193		A0A5F8A896.6	UPI0010A22289	5/30		PANTHER:PTHR12877,PANTHER:PTHR12877:SF14,MobiDB_lite:mobidb-lite	MODERATE
ARHGEF10	Mmul_10	8	2365931	2365931	+	Missense_Mutation	SNP	G	G	A	rs1081906873	17857	NORMAL	G	G	ENSMMUT00000082410	5/30	35	14	21	ARHGEF10,missense_variant,,ENSMMUT00000013221,;ARHGEF10,missense_variant,,ENSMMUT00000013222,;ARHGEF10,missense_variant,,ENSMMUT00000061434,;ARHGEF10,missense_variant,,ENSMMUT00000063057,;ARHGEF10,missense_variant,,ENSMMUT00000082410,;ARHGEF10,missense_variant,,ENSMMUT00000085940,;ARHGEF10,missense_variant,,ENSMMUT00000100808,;ARHGEF10,missense_variant,,ENSMMUT00000101599,;ARHGEF10,missense_varia…	A	ENSMMUG00000009472	ENSMMUT00000082410	Transcript	missense_variant	1068	220	74	A/T	Gcc/Acc	rs1081906873			1	ARHGEF10	VGNC		protein_coding	YES		ENSMMUP00000081193		A0A5F8A896.6	UPI0010A22289	5/30		PANTHER:PTHR12877,PANTHER:PTHR12877:SF14,MobiDB_lite:mobidb-lite	MODERATE
ARHGEF10	Mmul_10	8	2365931	2365931	+	Missense_Mutation	SNP	G	G	A	rs1081906873	17874	NORMAL	G	G	ENSMMUT00000082410	5/30	38	20	18	ARHGEF10,missense_variant,,ENSMMUT00000013221,;ARHGEF10,missense_variant,,ENSMMUT00000013222,;ARHGEF10,missense_variant,,ENSMMUT00000061434,;ARHGEF10,missense_variant,,ENSMMUT00000063057,;ARHGEF10,missense_variant,,ENSMMUT00000082410,;ARHGEF10,missense_variant,,ENSMMUT00000085940,;ARHGEF10,missense_variant,,ENSMMUT00000100808,;ARHGEF10,missense_variant,,ENSMMUT00000101599,;ARHGEF10,missense_varia…	A	ENSMMUG00000009472	ENSMMUT00000082410	Transcript	missense_variant	1068	220	74	A/T	Gcc/Acc	rs1081906873			1	ARHGEF10	VGNC		protein_coding	YES		ENSMMUP00000081193		A0A5F8A896.6	UPI0010A22289	5/30		PANTHER:PTHR12877,PANTHER:PTHR12877:SF14,MobiDB_lite:mobidb-lite	MODERATE
ARHGEF10	Mmul_10	8	2365931	2365931	+	Missense_Mutation	SNP	G	G	A	rs1081906873	17944	NORMAL	G	G	ENSMMUT00000082410	5/30	22	14	8	ARHGEF10,missense_variant,,ENSMMUT00000013221,;ARHGEF10,missense_variant,,ENSMMUT00000013222,;ARHGEF10,missense_variant,,ENSMMUT00000061434,;ARHGEF10,missense_variant,,ENSMMUT00000063057,;ARHGEF10,missense_variant,,ENSMMUT00000082410,;ARHGEF10,missense_variant,,ENSMMUT00000085940,;ARHGEF10,missense_variant,,ENSMMUT00000100808,;ARHGEF10,missense_variant,,ENSMMUT00000101599,;ARHGEF10,missense_varia…	A	ENSMMUG00000009472	ENSMMUT00000082410	Transcript	missense_variant	1068	220	74	A/T	Gcc/Acc	rs1081906873			1	ARHGEF10	VGNC		protein_coding	YES		ENSMMUP00000081193		A0A5F8A896.6	UPI0010A22289	5/30		PANTHER:PTHR12877,PANTHER:PTHR12877:SF14,MobiDB_lite:mobidb-lite	MODERATE
ARHGEF10	Mmul_10	8	2365931	2365931	+	Missense_Mutation	SNP	G	G	A	rs1081906873	17968	NORMAL	G	G	ENSMMUT00000082410	5/30	31	17	14	ARHGEF10,missense_variant,,ENSMMUT00000013221,;ARHGEF10,missense_variant,,ENSMMUT00000013222,;ARHGEF10,missense_variant,,ENSMMUT00000061434,;ARHGEF10,missense_variant,,ENSMMUT00000063057,;ARHGEF10,missense_variant,,ENSMMUT00000082410,;ARHGEF10,missense_variant,,ENSMMUT00000085940,;ARHGEF10,missense_variant,,ENSMMUT00000100808,;ARHGEF10,missense_variant,,ENSMMUT00000101599,;ARHGEF10,missense_varia…	A	ENSMMUG00000009472	ENSMMUT00000082410	Transcript	missense_variant	1068	220	74	A/T	Gcc/Acc	rs1081906873			1	ARHGEF10	VGNC		protein_coding	YES		ENSMMUP00000081193		A0A5F8A896.6	UPI0010A22289	5/30		PANTHER:PTHR12877,PANTHER:PTHR12877:SF14,MobiDB_lite:mobidb-lite	MODERATE
ARHGEF10	Mmul_10	8	2365931	2365931	+	Missense_Mutation	SNP	G	G	A	rs1081906873	17979	NORMAL	G	G	ENSMMUT00000082410	5/30	31	21	10	ARHGEF10,missense_variant,,ENSMMUT00000013221,;ARHGEF10,missense_variant,,ENSMMUT00000013222,;ARHGEF10,missense_variant,,ENSMMUT00000061434,;ARHGEF10,missense_variant,,ENSMMUT00000063057,;ARHGEF10,missense_variant,,ENSMMUT00000082410,;ARHGEF10,missense_variant,,ENSMMUT00000085940,;ARHGEF10,missense_variant,,ENSMMUT00000100808,;ARHGEF10,missense_variant,,ENSMMUT00000101599,;ARHGEF10,missense_varia…	A	ENSMMUG00000009472	ENSMMUT00000082410	Transcript	missense_variant	1068	220	74	A/T	Gcc/Acc	rs1081906873			1	ARHGEF10	VGNC		protein_coding	YES		ENSMMUP00000081193		A0A5F8A896.6	UPI0010A22289	5/30		PANTHER:PTHR12877,PANTHER:PTHR12877:SF14,MobiDB_lite:mobidb-lite	MODERATE
ARHGEF10	Mmul_10	8	2365931	2365931	+	Missense_Mutation	SNP	G	G	A	rs1081906873	18057	NORMAL	G	G	ENSMMUT00000082410	5/30	40	20	20	ARHGEF10,missense_variant,,ENSMMUT00000013221,;ARHGEF10,missense_variant,,ENSMMUT00000013222,;ARHGEF10,missense_variant,,ENSMMUT00000061434,;ARHGEF10,missense_variant,,ENSMMUT00000063057,;ARHGEF10,missense_variant,,ENSMMUT00000082410,;ARHGEF10,missense_variant,,ENSMMUT00000085940,;ARHGEF10,missense_variant,,ENSMMUT00000100808,;ARHGEF10,missense_variant,,ENSMMUT00000101599,;ARHGEF10,missense_varia…	A	ENSMMUG00000009472	ENSMMUT00000082410	Transcript	missense_variant	1068	220	74	A/T	Gcc/Acc	rs1081906873			1	ARHGEF10	VGNC		protein_coding	YES		ENSMMUP00000081193		A0A5F8A896.6	UPI0010A22289	5/30		PANTHER:PTHR12877,PANTHER:PTHR12877:SF14,MobiDB_lite:mobidb-lite	MODERATE
ARHGEF10	Mmul_10	8	2365931	2365931	+	Missense_Mutation	SNP	G	G	A	rs1081906873	18110	NORMAL	G	G	ENSMMUT00000082410	5/30	32	20	12	ARHGEF10,missense_variant,,ENSMMUT00000013221,;ARHGEF10,missense_variant,,ENSMMUT00000013222,;ARHGEF10,missense_variant,,ENSMMUT00000061434,;ARHGEF10,missense_variant,,ENSMMUT00000063057,;ARHGEF10,missense_variant,,ENSMMUT00000082410,;ARHGEF10,missense_variant,,ENSMMUT00000085940,;ARHGEF10,missense_variant,,ENSMMUT00000100808,;ARHGEF10,missense_variant,,ENSMMUT00000101599,;ARHGEF10,missense_varia…	A	ENSMMUG00000009472	ENSMMUT00000082410	Transcript	missense_variant	1068	220	74	A/T	Gcc/Acc	rs1081906873			1	ARHGEF10	VGNC		protein_coding	YES		ENSMMUP00000081193		A0A5F8A896.6	UPI0010A22289	5/30		PANTHER:PTHR12877,PANTHER:PTHR12877:SF14,MobiDB_lite:mobidb-lite	MODERATE
ARHGEF10	Mmul_10	8	2365931	2365931	+	Missense_Mutation	SNP	G	G	A	rs1081906873	18113	NORMAL	G	G	ENSMMUT00000082410	5/30	38	24	14	ARHGEF10,missense_variant,,ENSMMUT00000013221,;ARHGEF10,missense_variant,,ENSMMUT00000013222,;ARHGEF10,missense_variant,,ENSMMUT00000061434,;ARHGEF10,missense_variant,,ENSMMUT00000063057,;ARHGEF10,missense_variant,,ENSMMUT00000082410,;ARHGEF10,missense_variant,,ENSMMUT00000085940,;ARHGEF10,missense_variant,,ENSMMUT00000100808,;ARHGEF10,missense_variant,,ENSMMUT00000101599,;ARHGEF10,missense_varia…	A	ENSMMUG00000009472	ENSMMUT00000082410	Transcript	missense_variant	1068	220	74	A/T	Gcc/Acc	rs1081906873			1	ARHGEF10	VGNC		protein_coding	YES		ENSMMUP00000081193		A0A5F8A896.6	UPI0010A22289	5/30		PANTHER:PTHR12877,PANTHER:PTHR12877:SF14,MobiDB_lite:mobidb-lite	MODERATE
ARHGEF10	Mmul_10	8	2365931	2365931	+	Missense_Mutation	SNP	G	G	A	rs1081906873	18167	NORMAL	G	G	ENSMMUT00000082410	5/30	29	16	13	ARHGEF10,missense_variant,,ENSMMUT00000013221,;ARHGEF10,missense_variant,,ENSMMUT00000013222,;ARHGEF10,missense_variant,,ENSMMUT00000061434,;ARHGEF10,missense_variant,,ENSMMUT00000063057,;ARHGEF10,missense_variant,,ENSMMUT00000082410,;ARHGEF10,missense_variant,,ENSMMUT00000085940,;ARHGEF10,missense_variant,,ENSMMUT00000100808,;ARHGEF10,missense_variant,,ENSMMUT00000101599,;ARHGEF10,missense_varia…	A	ENSMMUG00000009472	ENSMMUT00000082410	Transcript	missense_variant	1068	220	74	A/T	Gcc/Acc	rs1081906873			1	ARHGEF10	VGNC		protein_coding	YES		ENSMMUP00000081193		A0A5F8A896.6	UPI0010A22289	5/30		PANTHER:PTHR12877,PANTHER:PTHR12877:SF14,MobiDB_lite:mobidb-lite	MODERATE
ARHGEF10	Mmul_10	8	2365931	2365931	+	Missense_Mutation	SNP	G	G	A	rs1081906873	18206	NORMAL	G	G	ENSMMUT00000082410	5/30	39	25	14	ARHGEF10,missense_variant,,ENSMMUT00000013221,;ARHGEF10,missense_variant,,ENSMMUT00000013222,;ARHGEF10,missense_variant,,ENSMMUT00000061434,;ARHGEF10,missense_variant,,ENSMMUT00000063057,;ARHGEF10,missense_variant,,ENSMMUT00000082410,;ARHGEF10,missense_variant,,ENSMMUT00000085940,;ARHGEF10,missense_variant,,ENSMMUT00000100808,;ARHGEF10,missense_variant,,ENSMMUT00000101599,;ARHGEF10,missense_varia…	A	ENSMMUG00000009472	ENSMMUT00000082410	Transcript	missense_variant	1068	220	74	A/T	Gcc/Acc	rs1081906873			1	ARHGEF10	VGNC		protein_coding	YES		ENSMMUP00000081193		A0A5F8A896.6	UPI0010A22289	5/30		PANTHER:PTHR12877,PANTHER:PTHR12877:SF14,MobiDB_lite:mobidb-lite	MODERATE
ARHGEF10	Mmul_10	8	2365931	2365931	+	Missense_Mutation	SNP	G	G	A	rs1081906873	18210	NORMAL	G	G	ENSMMUT00000082410	5/30	28	18	10	ARHGEF10,missense_variant,,ENSMMUT00000013221,;ARHGEF10,missense_variant,,ENSMMUT00000013222,;ARHGEF10,missense_variant,,ENSMMUT00000061434,;ARHGEF10,missense_variant,,ENSMMUT00000063057,;ARHGEF10,missense_variant,,ENSMMUT00000082410,;ARHGEF10,missense_variant,,ENSMMUT00000085940,;ARHGEF10,missense_variant,,ENSMMUT00000100808,;ARHGEF10,missense_variant,,ENSMMUT00000101599,;ARHGEF10,missense_varia…	A	ENSMMUG00000009472	ENSMMUT00000082410	Transcript	missense_variant	1068	220	74	A/T	Gcc/Acc	rs1081906873			1	ARHGEF10	VGNC		protein_coding	YES		ENSMMUP00000081193		A0A5F8A896.6	UPI0010A22289	5/30		PANTHER:PTHR12877,PANTHER:PTHR12877:SF14,MobiDB_lite:mobidb-lite	MODERATE
ARHGEF10	Mmul_10	8	2365931	2365931	+	Missense_Mutation	SNP	G	G	A	rs1081906873	18216	NORMAL	G	G	ENSMMUT00000082410	5/30	32	14	18	ARHGEF10,missense_variant,,ENSMMUT00000013221,;ARHGEF10,missense_variant,,ENSMMUT00000013222,;ARHGEF10,missense_variant,,ENSMMUT00000061434,;ARHGEF10,missense_variant,,ENSMMUT00000063057,;ARHGEF10,missense_variant,,ENSMMUT00000082410,;ARHGEF10,missense_variant,,ENSMMUT00000085940,;ARHGEF10,missense_variant,,ENSMMUT00000100808,;ARHGEF10,missense_variant,,ENSMMUT00000101599,;ARHGEF10,missense_varia…	A	ENSMMUG00000009472	ENSMMUT00000082410	Transcript	missense_variant	1068	220	74	A/T	Gcc/Acc	rs1081906873			1	ARHGEF10	VGNC		protein_coding	YES		ENSMMUP00000081193		A0A5F8A896.6	UPI0010A22289	5/30		PANTHER:PTHR12877,PANTHER:PTHR12877:SF14,MobiDB_lite:mobidb-lite	MODERATE
ARHGEF10	Mmul_10	8	2365931	2365931	+	Missense_Mutation	SNP	G	G	A	rs1081906873	22256	NORMAL	G	G	ENSMMUT00000082410	5/30	26	14	12	ARHGEF10,missense_variant,,ENSMMUT00000013221,;ARHGEF10,missense_variant,,ENSMMUT00000013222,;ARHGEF10,missense_variant,,ENSMMUT00000061434,;ARHGEF10,missense_variant,,ENSMMUT00000063057,;ARHGEF10,missense_variant,,ENSMMUT00000082410,;ARHGEF10,missense_variant,,ENSMMUT00000085940,;ARHGEF10,missense_variant,,ENSMMUT00000100808,;ARHGEF10,missense_variant,,ENSMMUT00000101599,;ARHGEF10,missense_varia…	A	ENSMMUG00000009472	ENSMMUT00000082410	Transcript	missense_variant	1068	220	74	A/T	Gcc/Acc	rs1081906873			1	ARHGEF10	VGNC		protein_coding	YES		ENSMMUP00000081193		A0A5F8A896.6	UPI0010A22289	5/30		PANTHER:PTHR12877,PANTHER:PTHR12877:SF14,MobiDB_lite:mobidb-lite	MODERATE
ARHGEF10	Mmul_10	8	2365931	2365931	+	Missense_Mutation	SNP	G	G	A	rs1081906873	22523	NORMAL	G	G	ENSMMUT00000082410	5/30	21	10	11	ARHGEF10,missense_variant,,ENSMMUT00000013221,;ARHGEF10,missense_variant,,ENSMMUT00000013222,;ARHGEF10,missense_variant,,ENSMMUT00000061434,;ARHGEF10,missense_variant,,ENSMMUT00000063057,;ARHGEF10,missense_variant,,ENSMMUT00000082410,;ARHGEF10,missense_variant,,ENSMMUT00000085940,;ARHGEF10,missense_variant,,ENSMMUT00000100808,;ARHGEF10,missense_variant,,ENSMMUT00000101599,;ARHGEF10,missense_varia…	A	ENSMMUG00000009472	ENSMMUT00000082410	Transcript	missense_variant	1068	220	74	A/T	Gcc/Acc	rs1081906873			1	ARHGEF10	VGNC		protein_coding	YES		ENSMMUP00000081193		A0A5F8A896.6	UPI0010A22289	5/30		PANTHER:PTHR12877,PANTHER:PTHR12877:SF14,MobiDB_lite:mobidb-lite	MODERATE
ARHGEF10	Mmul_10	8	2365931	2365931	+	Missense_Mutation	SNP	G	G	A	rs1081906873	26440	NORMAL	G	G	ENSMMUT00000082410	5/30	31	19	12	ARHGEF10,missense_variant,,ENSMMUT00000013221,;ARHGEF10,missense_variant,,ENSMMUT00000013222,;ARHGEF10,missense_variant,,ENSMMUT00000061434,;ARHGEF10,missense_variant,,ENSMMUT00000063057,;ARHGEF10,missense_variant,,ENSMMUT00000082410,;ARHGEF10,missense_variant,,ENSMMUT00000085940,;ARHGEF10,missense_variant,,ENSMMUT00000100808,;ARHGEF10,missense_variant,,ENSMMUT00000101599,;ARHGEF10,missense_varia…	A	ENSMMUG00000009472	ENSMMUT00000082410	Transcript	missense_variant	1068	220	74	A/T	Gcc/Acc	rs1081906873			1	ARHGEF10	VGNC		protein_coding	YES		ENSMMUP00000081193		A0A5F8A896.6	UPI0010A22289	5/30		PANTHER:PTHR12877,PANTHER:PTHR12877:SF14,MobiDB_lite:mobidb-lite	MODERATE
ARHGEF10	Mmul_10	8	2365931	2365931	+	Missense_Mutation	SNP	G	G	A	rs1081906873	26537	NORMAL	G	G	ENSMMUT00000082410	5/30	24	11	13	ARHGEF10,missense_variant,,ENSMMUT00000013221,;ARHGEF10,missense_variant,,ENSMMUT00000013222,;ARHGEF10,missense_variant,,ENSMMUT00000061434,;ARHGEF10,missense_variant,,ENSMMUT00000063057,;ARHGEF10,missense_variant,,ENSMMUT00000082410,;ARHGEF10,missense_variant,,ENSMMUT00000085940,;ARHGEF10,missense_variant,,ENSMMUT00000100808,;ARHGEF10,missense_variant,,ENSMMUT00000101599,;ARHGEF10,missense_varia…	A	ENSMMUG00000009472	ENSMMUT00000082410	Transcript	missense_variant	1068	220	74	A/T	Gcc/Acc	rs1081906873			1	ARHGEF10	VGNC		protein_coding	YES		ENSMMUP00000081193		A0A5F8A896.6	UPI0010A22289	5/30		PANTHER:PTHR12877,PANTHER:PTHR12877:SF14,MobiDB_lite:mobidb-lite	MODERATE
ARHGEF10	Mmul_10	8	2365931	2365931	+	Missense_Mutation	SNP	G	G	A	rs1081906873	26661	NORMAL	G	G	ENSMMUT00000082410	5/30	30	15	15	ARHGEF10,missense_variant,,ENSMMUT00000013221,;ARHGEF10,missense_variant,,ENSMMUT00000013222,;ARHGEF10,missense_variant,,ENSMMUT00000061434,;ARHGEF10,missense_variant,,ENSMMUT00000063057,;ARHGEF10,missense_variant,,ENSMMUT00000082410,;ARHGEF10,missense_variant,,ENSMMUT00000085940,;ARHGEF10,missense_variant,,ENSMMUT00000100808,;ARHGEF10,missense_variant,,ENSMMUT00000101599,;ARHGEF10,missense_varia…	A	ENSMMUG00000009472	ENSMMUT00000082410	Transcript	missense_variant	1068	220	74	A/T	Gcc/Acc	rs1081906873			1	ARHGEF10	VGNC		protein_coding	YES		ENSMMUP00000081193		A0A5F8A896.6	UPI0010A22289	5/30		PANTHER:PTHR12877,PANTHER:PTHR12877:SF14,MobiDB_lite:mobidb-lite	MODERATE
ARHGEF10	Mmul_10	8	2365931	2365931	+	Missense_Mutation	SNP	G	G	A	rs1081906873	26851	NORMAL	G	G	ENSMMUT00000082410	5/30	20	8	12	ARHGEF10,missense_variant,,ENSMMUT00000013221,;ARHGEF10,missense_variant,,ENSMMUT00000013222,;ARHGEF10,missense_variant,,ENSMMUT00000061434,;ARHGEF10,missense_variant,,ENSMMUT00000063057,;ARHGEF10,missense_variant,,ENSMMUT00000082410,;ARHGEF10,missense_variant,,ENSMMUT00000085940,;ARHGEF10,missense_variant,,ENSMMUT00000100808,;ARHGEF10,missense_variant,,ENSMMUT00000101599,;ARHGEF10,missense_varia…	A	ENSMMUG00000009472	ENSMMUT00000082410	Transcript	missense_variant	1068	220	74	A/T	Gcc/Acc	rs1081906873			1	ARHGEF10	VGNC		protein_coding	YES		ENSMMUP00000081193		A0A5F8A896.6	UPI0010A22289	5/30		PANTHER:PTHR12877,PANTHER:PTHR12877:SF14,MobiDB_lite:mobidb-lite	MODERATE
ARHGEF10	Mmul_10	8	2365931	2365931	+	Missense_Mutation	SNP	G	G	A	rs1081906873	27513	NORMAL	G	G	ENSMMUT00000082410	5/30	33	19	14	ARHGEF10,missense_variant,,ENSMMUT00000013221,;ARHGEF10,missense_variant,,ENSMMUT00000013222,;ARHGEF10,missense_variant,,ENSMMUT00000061434,;ARHGEF10,missense_variant,,ENSMMUT00000063057,;ARHGEF10,missense_variant,,ENSMMUT00000082410,;ARHGEF10,missense_variant,,ENSMMUT00000085940,;ARHGEF10,missense_variant,,ENSMMUT00000100808,;ARHGEF10,missense_variant,,ENSMMUT00000101599,;ARHGEF10,missense_varia…	A	ENSMMUG00000009472	ENSMMUT00000082410	Transcript	missense_variant	1068	220	74	A/T	Gcc/Acc	rs1081906873			1	ARHGEF10	VGNC		protein_coding	YES		ENSMMUP00000081193		A0A5F8A896.6	UPI0010A22289	5/30		PANTHER:PTHR12877,PANTHER:PTHR12877:SF14,MobiDB_lite:mobidb-lite	MODERATE
ARHGEF10	Mmul_10	8	2365931	2365931	+	Missense_Mutation	SNP	G	G	A	rs1081906873	27516	NORMAL	G	G	ENSMMUT00000082410	5/30	21	12	9	ARHGEF10,missense_variant,,ENSMMUT00000013221,;ARHGEF10,missense_variant,,ENSMMUT00000013222,;ARHGEF10,missense_variant,,ENSMMUT00000061434,;ARHGEF10,missense_variant,,ENSMMUT00000063057,;ARHGEF10,missense_variant,,ENSMMUT00000082410,;ARHGEF10,missense_variant,,ENSMMUT00000085940,;ARHGEF10,missense_variant,,ENSMMUT00000100808,;ARHGEF10,missense_variant,,ENSMMUT00000101599,;ARHGEF10,missense_varia…	A	ENSMMUG00000009472	ENSMMUT00000082410	Transcript	missense_variant	1068	220	74	A/T	Gcc/Acc	rs1081906873			1	ARHGEF10	VGNC		protein_coding	YES		ENSMMUP00000081193		A0A5F8A896.6	UPI0010A22289	5/30		PANTHER:PTHR12877,PANTHER:PTHR12877:SF14,MobiDB_lite:mobidb-lite	MODERATE
ARHGEF10	Mmul_10	8	2365931	2365931	+	Missense_Mutation	SNP	G	G	A	rs1081906873	27521	NORMAL	G	G	ENSMMUT00000082410	5/30	38	16	22	ARHGEF10,missense_variant,,ENSMMUT00000013221,;ARHGEF10,missense_variant,,ENSMMUT00000013222,;ARHGEF10,missense_variant,,ENSMMUT00000061434,;ARHGEF10,missense_variant,,ENSMMUT00000063057,;ARHGEF10,missense_variant,,ENSMMUT00000082410,;ARHGEF10,missense_variant,,ENSMMUT00000085940,;ARHGEF10,missense_variant,,ENSMMUT00000100808,;ARHGEF10,missense_variant,,ENSMMUT00000101599,;ARHGEF10,missense_varia…	A	ENSMMUG00000009472	ENSMMUT00000082410	Transcript	missense_variant	1068	220	74	A/T	Gcc/Acc	rs1081906873			1	ARHGEF10	VGNC		protein_coding	YES		ENSMMUP00000081193		A0A5F8A896.6	UPI0010A22289	5/30		PANTHER:PTHR12877,PANTHER:PTHR12877:SF14,MobiDB_lite:mobidb-lite	MODERATE
ARHGEF10	Mmul_10	8	2365931	2365931	+	Missense_Mutation	SNP	G	G	A	rs1081906873	27536	NORMAL	G	G	ENSMMUT00000082410	5/30	25	6	19	ARHGEF10,missense_variant,,ENSMMUT00000013221,;ARHGEF10,missense_variant,,ENSMMUT00000013222,;ARHGEF10,missense_variant,,ENSMMUT00000061434,;ARHGEF10,missense_variant,,ENSMMUT00000063057,;ARHGEF10,missense_variant,,ENSMMUT00000082410,;ARHGEF10,missense_variant,,ENSMMUT00000085940,;ARHGEF10,missense_variant,,ENSMMUT00000100808,;ARHGEF10,missense_variant,,ENSMMUT00000101599,;ARHGEF10,missense_varia…	A	ENSMMUG00000009472	ENSMMUT00000082410	Transcript	missense_variant	1068	220	74	A/T	Gcc/Acc	rs1081906873			1	ARHGEF10	VGNC		protein_coding	YES		ENSMMUP00000081193		A0A5F8A896.6	UPI0010A22289	5/30		PANTHER:PTHR12877,PANTHER:PTHR12877:SF14,MobiDB_lite:mobidb-lite	MODERATE
ARHGEF10	Mmul_10	8	2365931	2365931	+	Missense_Mutation	SNP	G	G	A	rs1081906873	30186	NORMAL	G	G	ENSMMUT00000082410	5/30	32	14	18	ARHGEF10,missense_variant,,ENSMMUT00000013221,;ARHGEF10,missense_variant,,ENSMMUT00000013222,;ARHGEF10,missense_variant,,ENSMMUT00000061434,;ARHGEF10,missense_variant,,ENSMMUT00000063057,;ARHGEF10,missense_variant,,ENSMMUT00000082410,;ARHGEF10,missense_variant,,ENSMMUT00000085940,;ARHGEF10,missense_variant,,ENSMMUT00000100808,;ARHGEF10,missense_variant,,ENSMMUT00000101599,;ARHGEF10,missense_varia…	A	ENSMMUG00000009472	ENSMMUT00000082410	Transcript	missense_variant	1068	220	74	A/T	Gcc/Acc	rs1081906873			1	ARHGEF10	VGNC		protein_coding	YES		ENSMMUP00000081193		A0A5F8A896.6	UPI0010A22289	5/30		PANTHER:PTHR12877,PANTHER:PTHR12877:SF14,MobiDB_lite:mobidb-lite	MODERATE
ARHGEF10	Mmul_10	8	2365971	2365971	+	Missense_Mutation	SNP	T	T	C	novel	17943	NORMAL	T	T	ENSMMUT00000082410	5/30	24	12	12	ARHGEF10,missense_variant,,ENSMMUT00000013221,;ARHGEF10,missense_variant,,ENSMMUT00000013222,;ARHGEF10,missense_variant,,ENSMMUT00000061434,;ARHGEF10,missense_variant,,ENSMMUT00000063057,;ARHGEF10,missense_variant,,ENSMMUT00000082410,;ARHGEF10,missense_variant,,ENSMMUT00000085940,;ARHGEF10,missense_variant,,ENSMMUT00000100808,;ARHGEF10,missense_variant,,ENSMMUT00000101599,;ARHGEF10,missense_varia…	C	ENSMMUG00000009472	ENSMMUT00000082410	Transcript	missense_variant	1108	260	87	V/A	gTg/gCg				1	ARHGEF10	VGNC		protein_coding	YES		ENSMMUP00000081193		A0A5F8A896.6	UPI0010A22289	5/30		PANTHER:PTHR12877,PANTHER:PTHR12877:SF14	MODERATE
ARHGEF10	Mmul_10	8	2412204	2412204	+	Missense_Mutation	SNP	G	G	A	rs291934728	17943	NORMAL	G	G	ENSMMUT00000082410	18/30	28	13	15	ARHGEF10,missense_variant,,ENSMMUT00000013221,;ARHGEF10,missense_variant,,ENSMMUT00000013222,;ARHGEF10,missense_variant,,ENSMMUT00000061434,;ARHGEF10,missense_variant,,ENSMMUT00000063057,;ARHGEF10,missense_variant,,ENSMMUT00000082410,;ARHGEF10,missense_variant,,ENSMMUT00000085940,;ARHGEF10,missense_variant,,ENSMMUT00000100808,;ARHGEF10,missense_variant,,ENSMMUT00000101599,;ARHGEF10,missense_varia…	A	ENSMMUG00000009472	ENSMMUT00000082410	Transcript	missense_variant	2808	1960	654	V/I	Gtc/Atc	rs291934728			1	ARHGEF10	VGNC		protein_coding	YES		ENSMMUP00000081193		A0A5F8A896.6	UPI0010A22289	18/30		Pfam:PF19057,PANTHER:PTHR12877,PANTHER:PTHR12877:SF14,Superfamily:SSF50729	MODERATE
ARHGEF10L	Mmul_10	1	207049890	207049890	+	Missense_Mutation	SNP	C	C	T	novel	18206	NORMAL	C	C	ENSMMUT00000099866	29/29	41	22	19	ARHGEF10L,missense_variant,,ENSMMUT00000015176,;ARHGEF10L,missense_variant,,ENSMMUT00000015177,;ARHGEF10L,missense_variant,,ENSMMUT00000015178,;ARHGEF10L,missense_variant,,ENSMMUT00000083537,;ARHGEF10L,missense_variant,,ENSMMUT00000085171,;ARHGEF10L,missense_variant,,ENSMMUT00000099866,;ARHGEF10L,missense_variant,,ENSMMUT00000106163,;	T	ENSMMUG00000010849	ENSMMUT00000099866	Transcript	missense_variant	4443	3758	1253	G/D	gGc/gAc				-1	ARHGEF10L	VGNC		protein_coding	YES		ENSMMUP00000063474		F7G3F9.59	UPI0010A2807E	29/29		PANTHER:PTHR12877:SF16,PANTHER:PTHR12877,Pfam:PF19056	MODERATE
ARHGEF10L	Mmul_10	1	207139876	207139876	+	Missense_Mutation	SNP	C	C	T	novel	17591	NORMAL	C	C	ENSMMUT00000099866	7/29	28	11	17	ARHGEF10L,missense_variant,,ENSMMUT00000015176,;ARHGEF10L,missense_variant,,ENSMMUT00000015177,;ARHGEF10L,missense_variant,,ENSMMUT00000015178,;ARHGEF10L,missense_variant,,ENSMMUT00000085171,;ARHGEF10L,missense_variant,,ENSMMUT00000099866,;ARHGEF10L,missense_variant,,ENSMMUT00000106163,;	T	ENSMMUG00000010849	ENSMMUT00000099866	Transcript	missense_variant	1253	568	190	E/K	Gag/Aag				-1	ARHGEF10L	VGNC		protein_coding	YES		ENSMMUP00000063474		F7G3F9.59	UPI0010A2807E	7/29		MobiDB_lite:mobidb-lite,MobiDB_lite:mobidb-lite,PANTHER:PTHR12877:SF16,PANTHER:PTHR12877	MODERATE
ARHGEF10L	Mmul_10	1	207139876	207139876	+	Missense_Mutation	SNP	C	C	T	novel	18216	NORMAL	C	C	ENSMMUT00000099866	7/29	36	18	18	ARHGEF10L,missense_variant,,ENSMMUT00000015176,;ARHGEF10L,missense_variant,,ENSMMUT00000015177,;ARHGEF10L,missense_variant,,ENSMMUT00000015178,;ARHGEF10L,missense_variant,,ENSMMUT00000085171,;ARHGEF10L,missense_variant,,ENSMMUT00000099866,;ARHGEF10L,missense_variant,,ENSMMUT00000106163,;	T	ENSMMUG00000010849	ENSMMUT00000099866	Transcript	missense_variant	1253	568	190	E/K	Gag/Aag				-1	ARHGEF10L	VGNC		protein_coding	YES		ENSMMUP00000063474		F7G3F9.59	UPI0010A2807E	7/29		MobiDB_lite:mobidb-lite,MobiDB_lite:mobidb-lite,PANTHER:PTHR12877:SF16,PANTHER:PTHR12877	MODERATE
ARHGEF10L	Mmul_10	1	207139876	207139876	+	Missense_Mutation	SNP	C	C	T	novel	18222	NORMAL	C	C	ENSMMUT00000099866	7/29	30	18	12	ARHGEF10L,missense_variant,,ENSMMUT00000015176,;ARHGEF10L,missense_variant,,ENSMMUT00000015177,;ARHGEF10L,missense_variant,,ENSMMUT00000015178,;ARHGEF10L,missense_variant,,ENSMMUT00000085171,;ARHGEF10L,missense_variant,,ENSMMUT00000099866,;ARHGEF10L,missense_variant,,ENSMMUT00000106163,;	T	ENSMMUG00000010849	ENSMMUT00000099866	Transcript	missense_variant	1253	568	190	E/K	Gag/Aag				-1	ARHGEF10L	VGNC		protein_coding	YES		ENSMMUP00000063474		F7G3F9.59	UPI0010A2807E	7/29		MobiDB_lite:mobidb-lite,MobiDB_lite:mobidb-lite,PANTHER:PTHR12877:SF16,PANTHER:PTHR12877	MODERATE
ARID1B	Mmul_10	4	63092065	63092066	+	In_Frame_Ins	INS	-	-	GCCGCCGCC	novel	27536	NORMAL	-	-	ENSMMUT00000003217	1/22	12	7	5	ARID1B,inframe_insertion,,ENSMMUT00000003216,;ARID1B,inframe_insertion,,ENSMMUT00000003217,;ARID1B,inframe_insertion,,ENSMMUT00000079690,;ARID1B,inframe_insertion,,ENSMMUT00000082148,;ARID1B,inframe_insertion,,ENSMMUT00000097107,;ARID1B,inframe_insertion,,ENSMMUT00000098588,;ARID1B,inframe_insertion,,ENSMMUT00000099057,;	GCCGCCGCC	ENSMMUG00000002270	ENSMMUT00000003217	Transcript	inframe_insertion	264-265	264-265	88-89	-/AAA	-/GCCGCCGCC				1	ARID1B	VGNC		protein_coding	YES		ENSMMUP00000003037		F7B475.53	UPI001236650F	1/22		Low_complexity_(Seg):seg	MODERATE
ARID1B	Mmul_10	4	63092147	63092149	+	In_Frame_Del	DEL	TCC	TCC	-	novel	17745	NORMAL	TCC	TCC	ENSMMUT00000003217	1/22	10	8	2	ARID1B,inframe_deletion,,ENSMMUT00000003216,;ARID1B,inframe_deletion,,ENSMMUT00000003217,;ARID1B,inframe_deletion,,ENSMMUT00000079690,;ARID1B,inframe_deletion,,ENSMMUT00000082148,;ARID1B,inframe_deletion,,ENSMMUT00000097107,;ARID1B,inframe_deletion,,ENSMMUT00000098588,;ARID1B,inframe_deletion,,ENSMMUT00000099057,;	-	ENSMMUG00000002270	ENSMMUT00000003217	Transcript	inframe_deletion	346-348	346-348	116	S/-	TCC/-				1	ARID1B	VGNC		protein_coding	YES		ENSMMUP00000003037		F7B475.53	UPI001236650F	1/22		Low_complexity_(Seg):seg	MODERATE
ARID1B	Mmul_10	4	63092380	63092381	+	In_Frame_Ins	INS	-	CAGCAGCAGCAG	CAGCAGCAGCAG	novel	18057	NORMAL	-	-	ENSMMUT00000003217	1/22	18	0	18	ARID1B,inframe_insertion,,ENSMMUT00000003216,;ARID1B,inframe_insertion,,ENSMMUT00000003217,;ARID1B,inframe_insertion,,ENSMMUT00000079690,;ARID1B,inframe_insertion,,ENSMMUT00000082148,;ARID1B,inframe_insertion,,ENSMMUT00000097107,;ARID1B,inframe_insertion,,ENSMMUT00000098588,;ARID1B,inframe_insertion,,ENSMMUT00000099057,;	CAGCAGCAGCAG	ENSMMUG00000002270	ENSMMUT00000003217	Transcript	inframe_insertion	579-580	579-580	193-194	-/QQQQ	-/CAGCAGCAGCAG				1	ARID1B	VGNC		protein_coding	YES		ENSMMUP00000003037		F7B475.53	UPI001236650F	1/22		Coiled-coils_(Ncoils):Coil,MobiDB_lite:mobidb-lite,MobiDB_lite:mobidb-lite,Low_complexity_(Seg):seg	MODERATE
ARID1B	Mmul_10	4	63092380	63092381	+	In_Frame_Ins	INS	-	CAGCAGCAGCAG	CAGCAGCAGCAG	novel	26661	NORMAL	-	-	ENSMMUT00000003217	1/22	21	0	21	ARID1B,inframe_insertion,,ENSMMUT00000003216,;ARID1B,inframe_insertion,,ENSMMUT00000003217,;ARID1B,inframe_insertion,,ENSMMUT00000079690,;ARID1B,inframe_insertion,,ENSMMUT00000082148,;ARID1B,inframe_insertion,,ENSMMUT00000097107,;ARID1B,inframe_insertion,,ENSMMUT00000098588,;ARID1B,inframe_insertion,,ENSMMUT00000099057,;	CAGCAGCAGCAG	ENSMMUG00000002270	ENSMMUT00000003217	Transcript	inframe_insertion	579-580	579-580	193-194	-/QQQQ	-/CAGCAGCAGCAG				1	ARID1B	VGNC		protein_coding	YES		ENSMMUP00000003037		F7B475.53	UPI001236650F	1/22		Coiled-coils_(Ncoils):Coil,MobiDB_lite:mobidb-lite,MobiDB_lite:mobidb-lite,Low_complexity_(Seg):seg	MODERATE
ARID1B	Mmul_10	4	63092380	63092381	+	In_Frame_Ins	INS	-	CAGCAGCAGCAG	CAGCAGCAG	novel	17686	NORMAL	-	-	ENSMMUT00000003217	1/22	14	0	8	ARID1B,inframe_insertion,,ENSMMUT00000003216,;ARID1B,inframe_insertion,,ENSMMUT00000003216,;ARID1B,inframe_insertion,,ENSMMUT00000003217,;ARID1B,inframe_insertion,,ENSMMUT00000003217,;ARID1B,inframe_insertion,,ENSMMUT00000079690,;ARID1B,inframe_insertion,,ENSMMUT00000079690,;ARID1B,inframe_insertion,,ENSMMUT00000082148,;ARID1B,inframe_insertion,,ENSMMUT00000082148,;ARID1B,inframe_insertion,,ENSMM…	CAGCAGCAG	ENSMMUG00000002270	ENSMMUT00000003217	Transcript	inframe_insertion	579-580	579-580	193-194	-/QQQ	-/CAGCAGCAG				1	ARID1B	VGNC		protein_coding	YES		ENSMMUP00000003037		F7B475.53	UPI001236650F	1/22		Coiled-coils_(Ncoils):Coil,MobiDB_lite:mobidb-lite,MobiDB_lite:mobidb-lite,Low_complexity_(Seg):seg	MODERATE
ARID1B	Mmul_10	4	63092380	63092381	+	In_Frame_Ins	INS	-	CAGCAGCAGCAG	CAGCAGCAG	novel	18200	NORMAL	-	-	ENSMMUT00000003217	1/22	10	0	6	ARID1B,inframe_insertion,,ENSMMUT00000003216,;ARID1B,inframe_insertion,,ENSMMUT00000003216,;ARID1B,inframe_insertion,,ENSMMUT00000003217,;ARID1B,inframe_insertion,,ENSMMUT00000003217,;ARID1B,inframe_insertion,,ENSMMUT00000079690,;ARID1B,inframe_insertion,,ENSMMUT00000079690,;ARID1B,inframe_insertion,,ENSMMUT00000082148,;ARID1B,inframe_insertion,,ENSMMUT00000082148,;ARID1B,inframe_insertion,,ENSMM…	CAGCAGCAG	ENSMMUG00000002270	ENSMMUT00000003217	Transcript	inframe_insertion	579-580	579-580	193-194	-/QQQ	-/CAGCAGCAG				1	ARID1B	VGNC		protein_coding	YES		ENSMMUP00000003037		F7B475.53	UPI001236650F	1/22		Coiled-coils_(Ncoils):Coil,MobiDB_lite:mobidb-lite,MobiDB_lite:mobidb-lite,Low_complexity_(Seg):seg	MODERATE
ARID1B	Mmul_10	4	63092380	63092381	+	In_Frame_Ins	INS	-	CAGCAGCAGCAG	CAGCAGCAG	novel	18201	NORMAL	-	-	ENSMMUT00000003217	1/22	14	0	5	ARID1B,inframe_insertion,,ENSMMUT00000003216,;ARID1B,inframe_insertion,,ENSMMUT00000003216,;ARID1B,inframe_insertion,,ENSMMUT00000003217,;ARID1B,inframe_insertion,,ENSMMUT00000003217,;ARID1B,inframe_insertion,,ENSMMUT00000079690,;ARID1B,inframe_insertion,,ENSMMUT00000079690,;ARID1B,inframe_insertion,,ENSMMUT00000082148,;ARID1B,inframe_insertion,,ENSMMUT00000082148,;ARID1B,inframe_insertion,,ENSMM…	CAGCAGCAG	ENSMMUG00000002270	ENSMMUT00000003217	Transcript	inframe_insertion	579-580	579-580	193-194	-/QQQ	-/CAGCAGCAG				1	ARID1B	VGNC		protein_coding	YES		ENSMMUP00000003037		F7B475.53	UPI001236650F	1/22		Coiled-coils_(Ncoils):Coil,MobiDB_lite:mobidb-lite,MobiDB_lite:mobidb-lite,Low_complexity_(Seg):seg	MODERATE
ARID1B	Mmul_10	4	63092380	63092381	+	In_Frame_Ins	INS	-	CAGCAGCAGCAG	CAGCAGCAG	novel	18208	NORMAL	-	-	ENSMMUT00000003217	1/22	18	0	10	ARID1B,inframe_insertion,,ENSMMUT00000003216,;ARID1B,inframe_insertion,,ENSMMUT00000003216,;ARID1B,inframe_insertion,,ENSMMUT00000003217,;ARID1B,inframe_insertion,,ENSMMUT00000003217,;ARID1B,inframe_insertion,,ENSMMUT00000079690,;ARID1B,inframe_insertion,,ENSMMUT00000079690,;ARID1B,inframe_insertion,,ENSMMUT00000082148,;ARID1B,inframe_insertion,,ENSMMUT00000082148,;ARID1B,inframe_insertion,,ENSMM…	CAGCAGCAG	ENSMMUG00000002270	ENSMMUT00000003217	Transcript	inframe_insertion	579-580	579-580	193-194	-/QQQ	-/CAGCAGCAG				1	ARID1B	VGNC		protein_coding	YES		ENSMMUP00000003037		F7B475.53	UPI001236650F	1/22		Coiled-coils_(Ncoils):Coil,MobiDB_lite:mobidb-lite,MobiDB_lite:mobidb-lite,Low_complexity_(Seg):seg	MODERATE
ARID1B	Mmul_10	4	63092380	63092381	+	In_Frame_Ins	INS	-	-	CAGCAGCAGCAGCAGCAG	novel	17857	NORMAL	-	-	ENSMMUT00000003217	1/22	17	8	9	ARID1B,inframe_insertion,,ENSMMUT00000003216,;ARID1B,inframe_insertion,,ENSMMUT00000003217,;ARID1B,inframe_insertion,,ENSMMUT00000079690,;ARID1B,inframe_insertion,,ENSMMUT00000082148,;ARID1B,inframe_insertion,,ENSMMUT00000097107,;ARID1B,inframe_insertion,,ENSMMUT00000098588,;ARID1B,inframe_insertion,,ENSMMUT00000099057,;	CAGCAGCAGCAGCAGCAG	ENSMMUG00000002270	ENSMMUT00000003217	Transcript	inframe_insertion	579-580	579-580	193-194	-/QQQQQQ	-/CAGCAGCAGCAGCAGCAG				1	ARID1B	VGNC		protein_coding	YES		ENSMMUP00000003037		F7B475.53	UPI001236650F	1/22		Coiled-coils_(Ncoils):Coil,MobiDB_lite:mobidb-lite,MobiDB_lite:mobidb-lite,Low_complexity_(Seg):seg	MODERATE
ARID1B	Mmul_10	4	63092380	63092381	+	In_Frame_Ins	INS	-	-	CAGCAGCAGCAG	novel	17944	NORMAL	-	-	ENSMMUT00000003217	1/22	14	6	8	ARID1B,inframe_insertion,,ENSMMUT00000003216,;ARID1B,inframe_insertion,,ENSMMUT00000003217,;ARID1B,inframe_insertion,,ENSMMUT00000079690,;ARID1B,inframe_insertion,,ENSMMUT00000082148,;ARID1B,inframe_insertion,,ENSMMUT00000097107,;ARID1B,inframe_insertion,,ENSMMUT00000098588,;ARID1B,inframe_insertion,,ENSMMUT00000099057,;	CAGCAGCAGCAG	ENSMMUG00000002270	ENSMMUT00000003217	Transcript	inframe_insertion	579-580	579-580	193-194	-/QQQQ	-/CAGCAGCAGCAG				1	ARID1B	VGNC		protein_coding	YES		ENSMMUP00000003037		F7B475.53	UPI001236650F	1/22		Coiled-coils_(Ncoils):Coil,MobiDB_lite:mobidb-lite,MobiDB_lite:mobidb-lite,Low_complexity_(Seg):seg	MODERATE
ARID1B	Mmul_10	4	63092380	63092381	+	In_Frame_Ins	INS	-	-	CAGCAGCAGCAG	novel	21847	NORMAL	-	-	ENSMMUT00000003217	1/22	19	12	7	ARID1B,inframe_insertion,,ENSMMUT00000003216,;ARID1B,inframe_insertion,,ENSMMUT00000003217,;ARID1B,inframe_insertion,,ENSMMUT00000079690,;ARID1B,inframe_insertion,,ENSMMUT00000082148,;ARID1B,inframe_insertion,,ENSMMUT00000097107,;ARID1B,inframe_insertion,,ENSMMUT00000098588,;ARID1B,inframe_insertion,,ENSMMUT00000099057,;	CAGCAGCAGCAG	ENSMMUG00000002270	ENSMMUT00000003217	Transcript	inframe_insertion	579-580	579-580	193-194	-/QQQQ	-/CAGCAGCAGCAG				1	ARID1B	VGNC		protein_coding	YES		ENSMMUP00000003037		F7B475.53	UPI001236650F	1/22		Coiled-coils_(Ncoils):Coil,MobiDB_lite:mobidb-lite,MobiDB_lite:mobidb-lite,Low_complexity_(Seg):seg	MODERATE
ARID1B	Mmul_10	4	63092380	63092381	+	In_Frame_Ins	INS	-	-	CAGCAGCAGCAG	novel	23813	NORMAL	-	-	ENSMMUT00000003217	1/22	16	3	13	ARID1B,inframe_insertion,,ENSMMUT00000003216,;ARID1B,inframe_insertion,,ENSMMUT00000003217,;ARID1B,inframe_insertion,,ENSMMUT00000079690,;ARID1B,inframe_insertion,,ENSMMUT00000082148,;ARID1B,inframe_insertion,,ENSMMUT00000097107,;ARID1B,inframe_insertion,,ENSMMUT00000098588,;ARID1B,inframe_insertion,,ENSMMUT00000099057,;	CAGCAGCAGCAG	ENSMMUG00000002270	ENSMMUT00000003217	Transcript	inframe_insertion	579-580	579-580	193-194	-/QQQQ	-/CAGCAGCAGCAG				1	ARID1B	VGNC		protein_coding	YES		ENSMMUP00000003037		F7B475.53	UPI001236650F	1/22		Coiled-coils_(Ncoils):Coil,MobiDB_lite:mobidb-lite,MobiDB_lite:mobidb-lite,Low_complexity_(Seg):seg	MODERATE
ARID1B	Mmul_10	4	63092380	63092381	+	In_Frame_Ins	INS	-	-	CAGCAGCAGCAG	novel	25329	NORMAL	-	-	ENSMMUT00000003217	1/22	8	3	5	ARID1B,inframe_insertion,,ENSMMUT00000003216,;ARID1B,inframe_insertion,,ENSMMUT00000003217,;ARID1B,inframe_insertion,,ENSMMUT00000079690,;ARID1B,inframe_insertion,,ENSMMUT00000082148,;ARID1B,inframe_insertion,,ENSMMUT00000097107,;ARID1B,inframe_insertion,,ENSMMUT00000098588,;ARID1B,inframe_insertion,,ENSMMUT00000099057,;	CAGCAGCAGCAG	ENSMMUG00000002270	ENSMMUT00000003217	Transcript	inframe_insertion	579-580	579-580	193-194	-/QQQQ	-/CAGCAGCAGCAG				1	ARID1B	VGNC		protein_coding	YES		ENSMMUP00000003037		F7B475.53	UPI001236650F	1/22		Coiled-coils_(Ncoils):Coil,MobiDB_lite:mobidb-lite,MobiDB_lite:mobidb-lite,Low_complexity_(Seg):seg	MODERATE
ARID1B	Mmul_10	4	63092380	63092381	+	In_Frame_Ins	INS	-	-	CAGCAGCAGCAG	novel	27151	NORMAL	-	-	ENSMMUT00000003217	1/22	8	5	3	ARID1B,inframe_insertion,,ENSMMUT00000003216,;ARID1B,inframe_insertion,,ENSMMUT00000003217,;ARID1B,inframe_insertion,,ENSMMUT00000079690,;ARID1B,inframe_insertion,,ENSMMUT00000082148,;ARID1B,inframe_insertion,,ENSMMUT00000097107,;ARID1B,inframe_insertion,,ENSMMUT00000098588,;ARID1B,inframe_insertion,,ENSMMUT00000099057,;	CAGCAGCAGCAG	ENSMMUG00000002270	ENSMMUT00000003217	Transcript	inframe_insertion	579-580	579-580	193-194	-/QQQQ	-/CAGCAGCAGCAG				1	ARID1B	VGNC		protein_coding	YES		ENSMMUP00000003037		F7B475.53	UPI001236650F	1/22		Coiled-coils_(Ncoils):Coil,MobiDB_lite:mobidb-lite,MobiDB_lite:mobidb-lite,Low_complexity_(Seg):seg	MODERATE
ARID1B	Mmul_10	4	63092380	63092381	+	In_Frame_Ins	INS	-	-	CAGCAGCAGCAG	novel	27513	NORMAL	-	-	ENSMMUT00000003217	1/22	21	12	9	ARID1B,inframe_insertion,,ENSMMUT00000003216,;ARID1B,inframe_insertion,,ENSMMUT00000003217,;ARID1B,inframe_insertion,,ENSMMUT00000079690,;ARID1B,inframe_insertion,,ENSMMUT00000082148,;ARID1B,inframe_insertion,,ENSMMUT00000097107,;ARID1B,inframe_insertion,,ENSMMUT00000098588,;ARID1B,inframe_insertion,,ENSMMUT00000099057,;	CAGCAGCAGCAG	ENSMMUG00000002270	ENSMMUT00000003217	Transcript	inframe_insertion	579-580	579-580	193-194	-/QQQQ	-/CAGCAGCAGCAG				1	ARID1B	VGNC		protein_coding	YES		ENSMMUP00000003037		F7B475.53	UPI001236650F	1/22		Coiled-coils_(Ncoils):Coil,MobiDB_lite:mobidb-lite,MobiDB_lite:mobidb-lite,Low_complexity_(Seg):seg	MODERATE
ARID1B	Mmul_10	4	63092380	63092381	+	In_Frame_Ins	INS	-	-	CAGCAGCAGCAG	novel	27515	NORMAL	-	-	ENSMMUT00000003217	1/22	5	1	4	ARID1B,inframe_insertion,,ENSMMUT00000003216,;ARID1B,inframe_insertion,,ENSMMUT00000003217,;ARID1B,inframe_insertion,,ENSMMUT00000079690,;ARID1B,inframe_insertion,,ENSMMUT00000082148,;ARID1B,inframe_insertion,,ENSMMUT00000097107,;ARID1B,inframe_insertion,,ENSMMUT00000098588,;ARID1B,inframe_insertion,,ENSMMUT00000099057,;	CAGCAGCAGCAG	ENSMMUG00000002270	ENSMMUT00000003217	Transcript	inframe_insertion	579-580	579-580	193-194	-/QQQQ	-/CAGCAGCAGCAG				1	ARID1B	VGNC		protein_coding	YES		ENSMMUP00000003037		F7B475.53	UPI001236650F	1/22		Coiled-coils_(Ncoils):Coil,MobiDB_lite:mobidb-lite,MobiDB_lite:mobidb-lite,Low_complexity_(Seg):seg	MODERATE
ARID1B	Mmul_10	4	63092380	63092381	+	In_Frame_Ins	INS	-	-	CAGCAGCAG	novel	17745	NORMAL	-	-	ENSMMUT00000003217	1/22	16	8	8	ARID1B,inframe_insertion,,ENSMMUT00000003216,;ARID1B,inframe_insertion,,ENSMMUT00000003217,;ARID1B,inframe_insertion,,ENSMMUT00000079690,;ARID1B,inframe_insertion,,ENSMMUT00000082148,;ARID1B,inframe_insertion,,ENSMMUT00000097107,;ARID1B,inframe_insertion,,ENSMMUT00000098588,;ARID1B,inframe_insertion,,ENSMMUT00000099057,;	CAGCAGCAG	ENSMMUG00000002270	ENSMMUT00000003217	Transcript	inframe_insertion	579-580	579-580	193-194	-/QQQ	-/CAGCAGCAG				1	ARID1B	VGNC		protein_coding	YES		ENSMMUP00000003037		F7B475.53	UPI001236650F	1/22		Coiled-coils_(Ncoils):Coil,MobiDB_lite:mobidb-lite,MobiDB_lite:mobidb-lite,Low_complexity_(Seg):seg	MODERATE
ARID1B	Mmul_10	4	63092380	63092381	+	In_Frame_Ins	INS	-	-	CAGCAGCAG	novel	18167	NORMAL	-	-	ENSMMUT00000003217	1/22	14	6	8	ARID1B,inframe_insertion,,ENSMMUT00000003216,;ARID1B,inframe_insertion,,ENSMMUT00000003217,;ARID1B,inframe_insertion,,ENSMMUT00000079690,;ARID1B,inframe_insertion,,ENSMMUT00000082148,;ARID1B,inframe_insertion,,ENSMMUT00000097107,;ARID1B,inframe_insertion,,ENSMMUT00000098588,;ARID1B,inframe_insertion,,ENSMMUT00000099057,;	CAGCAGCAG	ENSMMUG00000002270	ENSMMUT00000003217	Transcript	inframe_insertion	579-580	579-580	193-194	-/QQQ	-/CAGCAGCAG				1	ARID1B	VGNC		protein_coding	YES		ENSMMUP00000003037		F7B475.53	UPI001236650F	1/22		Coiled-coils_(Ncoils):Coil,MobiDB_lite:mobidb-lite,MobiDB_lite:mobidb-lite,Low_complexity_(Seg):seg	MODERATE
ARID1B	Mmul_10	4	63092380	63092381	+	In_Frame_Ins	INS	-	-	CAGCAGCAG	novel	18205	NORMAL	-	-	ENSMMUT00000003217	1/22	13	5	8	ARID1B,inframe_insertion,,ENSMMUT00000003216,;ARID1B,inframe_insertion,,ENSMMUT00000003217,;ARID1B,inframe_insertion,,ENSMMUT00000079690,;ARID1B,inframe_insertion,,ENSMMUT00000082148,;ARID1B,inframe_insertion,,ENSMMUT00000097107,;ARID1B,inframe_insertion,,ENSMMUT00000098588,;ARID1B,inframe_insertion,,ENSMMUT00000099057,;	CAGCAGCAG	ENSMMUG00000002270	ENSMMUT00000003217	Transcript	inframe_insertion	579-580	579-580	193-194	-/QQQ	-/CAGCAGCAG				1	ARID1B	VGNC		protein_coding	YES		ENSMMUP00000003037		F7B475.53	UPI001236650F	1/22		Coiled-coils_(Ncoils):Coil,MobiDB_lite:mobidb-lite,MobiDB_lite:mobidb-lite,Low_complexity_(Seg):seg	MODERATE
ARID1B	Mmul_10	4	63092380	63092381	+	In_Frame_Ins	INS	-	-	CAGCAGCAG	novel	18210	NORMAL	-	-	ENSMMUT00000003217	1/22	17	9	8	ARID1B,inframe_insertion,,ENSMMUT00000003216,;ARID1B,inframe_insertion,,ENSMMUT00000003217,;ARID1B,inframe_insertion,,ENSMMUT00000079690,;ARID1B,inframe_insertion,,ENSMMUT00000082148,;ARID1B,inframe_insertion,,ENSMMUT00000097107,;ARID1B,inframe_insertion,,ENSMMUT00000098588,;ARID1B,inframe_insertion,,ENSMMUT00000099057,;	CAGCAGCAG	ENSMMUG00000002270	ENSMMUT00000003217	Transcript	inframe_insertion	579-580	579-580	193-194	-/QQQ	-/CAGCAGCAG				1	ARID1B	VGNC		protein_coding	YES		ENSMMUP00000003037		F7B475.53	UPI001236650F	1/22		Coiled-coils_(Ncoils):Coil,MobiDB_lite:mobidb-lite,MobiDB_lite:mobidb-lite,Low_complexity_(Seg):seg	MODERATE
ARID1B	Mmul_10	4	63092380	63092381	+	In_Frame_Ins	INS	-	-	CAGCAGCAG	novel	18607	NORMAL	-	-	ENSMMUT00000003217	1/22	10	8	2	ARID1B,inframe_insertion,,ENSMMUT00000003216,;ARID1B,inframe_insertion,,ENSMMUT00000003217,;ARID1B,inframe_insertion,,ENSMMUT00000079690,;ARID1B,inframe_insertion,,ENSMMUT00000082148,;ARID1B,inframe_insertion,,ENSMMUT00000097107,;ARID1B,inframe_insertion,,ENSMMUT00000098588,;ARID1B,inframe_insertion,,ENSMMUT00000099057,;	CAGCAGCAG	ENSMMUG00000002270	ENSMMUT00000003217	Transcript	inframe_insertion	579-580	579-580	193-194	-/QQQ	-/CAGCAGCAG				1	ARID1B	VGNC		protein_coding	YES		ENSMMUP00000003037		F7B475.53	UPI001236650F	1/22		Coiled-coils_(Ncoils):Coil,MobiDB_lite:mobidb-lite,MobiDB_lite:mobidb-lite,Low_complexity_(Seg):seg	MODERATE
ARID1B	Mmul_10	4	63092380	63092381	+	In_Frame_Ins	INS	-	-	CAGCAGCAG	novel	27536	NORMAL	-	-	ENSMMUT00000003217	1/22	12	8	4	ARID1B,inframe_insertion,,ENSMMUT00000003216,;ARID1B,inframe_insertion,,ENSMMUT00000003217,;ARID1B,inframe_insertion,,ENSMMUT00000079690,;ARID1B,inframe_insertion,,ENSMMUT00000082148,;ARID1B,inframe_insertion,,ENSMMUT00000097107,;ARID1B,inframe_insertion,,ENSMMUT00000098588,;ARID1B,inframe_insertion,,ENSMMUT00000099057,;	CAGCAGCAG	ENSMMUG00000002270	ENSMMUT00000003217	Transcript	inframe_insertion	579-580	579-580	193-194	-/QQQ	-/CAGCAGCAG				1	ARID1B	VGNC		protein_coding	YES		ENSMMUP00000003037		F7B475.53	UPI001236650F	1/22		Coiled-coils_(Ncoils):Coil,MobiDB_lite:mobidb-lite,MobiDB_lite:mobidb-lite,Low_complexity_(Seg):seg	MODERATE
ARID1B	Mmul_10	4	63092380	63092381	+	In_Frame_Ins	INS	-	-	CAG	novel	17943	NORMAL	-	-	ENSMMUT00000003217	1/22	22	13	9	ARID1B,inframe_insertion,,ENSMMUT00000003216,;ARID1B,inframe_insertion,,ENSMMUT00000003217,;ARID1B,inframe_insertion,,ENSMMUT00000079690,;ARID1B,inframe_insertion,,ENSMMUT00000082148,;ARID1B,inframe_insertion,,ENSMMUT00000097107,;ARID1B,inframe_insertion,,ENSMMUT00000098588,;ARID1B,inframe_insertion,,ENSMMUT00000099057,;	CAG	ENSMMUG00000002270	ENSMMUT00000003217	Transcript	inframe_insertion	579-580	579-580	193-194	-/Q	-/CAG				1	ARID1B	VGNC		protein_coding	YES		ENSMMUP00000003037		F7B475.53	UPI001236650F	1/22		Coiled-coils_(Ncoils):Coil,MobiDB_lite:mobidb-lite,MobiDB_lite:mobidb-lite,Low_complexity_(Seg):seg	MODERATE
ARID2	Mmul_10	11	45360606	45360606	+	Missense_Mutation	SNP	C	C	A	novel	17694	NORMAL	C	C	ENSMMUT00000022445	15/21	20	7	13	ARID2,missense_variant,,ENSMMUT00000022445,;ARID2,missense_variant,,ENSMMUT00000022446,;	A	ENSMMUG00000015962	ENSMMUT00000022445	Transcript	missense_variant	3921	3769	1257	H/N	Cat/Aat				1	ARID2	VGNC		protein_coding	YES		ENSMMUP00000020998		F7DCH3.68	UPI0010A23916	15/21		PANTHER:PTHR22970	MODERATE
ARPP21	Mmul_10	2	11960092	11960092	+	Missense_Mutation	SNP	C	C	T	novel	17943	NORMAL	C	C	ENSMMUT00000022441	22/22	29	12	17	ARPP21,missense_variant,,ENSMMUT00000022441,;ARPP21,missense_variant,,ENSMMUT00000022443,;ARPP21,missense_variant,,ENSMMUT00000062230,;ARPP21,missense_variant,,ENSMMUT00000086043,;ARPP21,missense_variant,,ENSMMUT00000102073,;	T	ENSMMUG00000015959	ENSMMUT00000022441	Transcript	missense_variant,splice_region_variant	2664	2287	763	V/M	Gtg/Atg				-1	ARPP21	VGNC		protein_coding	YES		ENSMMUP00000020994		F7DCJ5.52	UPI0003AB9318	22/22		PANTHER:PTHR15672,PANTHER:PTHR15672:SF14	MODERATE
ARPP21	Mmul_10	2	12014349	12014349	+	Missense_Mutation	SNP	C	C	T	rs1073814916	18022	NORMAL	C	C	ENSMMUT00000022441	19/22	43	21	22	ARPP21,missense_variant,,ENSMMUT00000022441,;ARPP21,missense_variant,,ENSMMUT00000022443,;ARPP21,missense_variant,,ENSMMUT00000062230,;ARPP21,missense_variant,,ENSMMUT00000086043,;ARPP21,missense_variant,,ENSMMUT00000102073,;	T	ENSMMUG00000015959	ENSMMUT00000022441	Transcript	missense_variant	2136	1759	587	V/M	Gtg/Atg	rs1073814916			-1	ARPP21	VGNC		protein_coding	YES		ENSMMUP00000020994		F7DCJ5.52	UPI0003AB9318	19/22		PANTHER:PTHR15672,PANTHER:PTHR15672:SF14	MODERATE
ARPP21	Mmul_10	2	12014349	12014349	+	Missense_Mutation	SNP	C	C	T	rs1073814916	18206	NORMAL	C	C	ENSMMUT00000022441	19/22	15	7	8	ARPP21,missense_variant,,ENSMMUT00000022441,;ARPP21,missense_variant,,ENSMMUT00000022443,;ARPP21,missense_variant,,ENSMMUT00000062230,;ARPP21,missense_variant,,ENSMMUT00000086043,;ARPP21,missense_variant,,ENSMMUT00000102073,;	T	ENSMMUG00000015959	ENSMMUT00000022441	Transcript	missense_variant	2136	1759	587	V/M	Gtg/Atg	rs1073814916			-1	ARPP21	VGNC		protein_coding	YES		ENSMMUP00000020994		F7DCJ5.52	UPI0003AB9318	19/22		PANTHER:PTHR15672,PANTHER:PTHR15672:SF14	MODERATE
ARPP21	Mmul_10	2	12014349	12014349	+	Missense_Mutation	SNP	C	C	T	rs1073814916	21742	NORMAL	C	C	ENSMMUT00000022441	19/22	20	8	12	ARPP21,missense_variant,,ENSMMUT00000022441,;ARPP21,missense_variant,,ENSMMUT00000022443,;ARPP21,missense_variant,,ENSMMUT00000062230,;ARPP21,missense_variant,,ENSMMUT00000086043,;ARPP21,missense_variant,,ENSMMUT00000102073,;	T	ENSMMUG00000015959	ENSMMUT00000022441	Transcript	missense_variant	2136	1759	587	V/M	Gtg/Atg	rs1073814916			-1	ARPP21	VGNC		protein_coding	YES		ENSMMUP00000020994		F7DCJ5.52	UPI0003AB9318	19/22		PANTHER:PTHR15672,PANTHER:PTHR15672:SF14	MODERATE
ARPP21	Mmul_10	2	12014349	12014349	+	Missense_Mutation	SNP	C	C	T	rs1073814916	21847	NORMAL	C	C	ENSMMUT00000022441	19/22	28	19	9	ARPP21,missense_variant,,ENSMMUT00000022441,;ARPP21,missense_variant,,ENSMMUT00000022443,;ARPP21,missense_variant,,ENSMMUT00000062230,;ARPP21,missense_variant,,ENSMMUT00000086043,;ARPP21,missense_variant,,ENSMMUT00000102073,;	T	ENSMMUG00000015959	ENSMMUT00000022441	Transcript	missense_variant	2136	1759	587	V/M	Gtg/Atg	rs1073814916			-1	ARPP21	VGNC		protein_coding	YES		ENSMMUP00000020994		F7DCJ5.52	UPI0003AB9318	19/22		PANTHER:PTHR15672,PANTHER:PTHR15672:SF14	MODERATE
ARPP21	Mmul_10	2	12014349	12014349	+	Missense_Mutation	SNP	C	C	T	rs1073814916	22256	NORMAL	C	C	ENSMMUT00000022441	19/22	33	14	19	ARPP21,missense_variant,,ENSMMUT00000022441,;ARPP21,missense_variant,,ENSMMUT00000022443,;ARPP21,missense_variant,,ENSMMUT00000062230,;ARPP21,missense_variant,,ENSMMUT00000086043,;ARPP21,missense_variant,,ENSMMUT00000102073,;	T	ENSMMUG00000015959	ENSMMUT00000022441	Transcript	missense_variant	2136	1759	587	V/M	Gtg/Atg	rs1073814916			-1	ARPP21	VGNC		protein_coding	YES		ENSMMUP00000020994		F7DCJ5.52	UPI0003AB9318	19/22		PANTHER:PTHR15672,PANTHER:PTHR15672:SF14	MODERATE
ARPP21	Mmul_10	2	12014349	12014349	+	Missense_Mutation	SNP	C	C	T	rs1073814916	22523	NORMAL	C	C	ENSMMUT00000022441	19/22	28	18	10	ARPP21,missense_variant,,ENSMMUT00000022441,;ARPP21,missense_variant,,ENSMMUT00000022443,;ARPP21,missense_variant,,ENSMMUT00000062230,;ARPP21,missense_variant,,ENSMMUT00000086043,;ARPP21,missense_variant,,ENSMMUT00000102073,;	T	ENSMMUG00000015959	ENSMMUT00000022441	Transcript	missense_variant	2136	1759	587	V/M	Gtg/Atg	rs1073814916			-1	ARPP21	VGNC		protein_coding	YES		ENSMMUP00000020994		F7DCJ5.52	UPI0003AB9318	19/22		PANTHER:PTHR15672,PANTHER:PTHR15672:SF14	MODERATE
ARPP21	Mmul_10	2	12014349	12014349	+	Missense_Mutation	SNP	C	C	T	rs1073814916	27516	NORMAL	C	C	ENSMMUT00000022441	19/22	13	7	6	ARPP21,missense_variant,,ENSMMUT00000022441,;ARPP21,missense_variant,,ENSMMUT00000022443,;ARPP21,missense_variant,,ENSMMUT00000062230,;ARPP21,missense_variant,,ENSMMUT00000086043,;ARPP21,missense_variant,,ENSMMUT00000102073,;	T	ENSMMUG00000015959	ENSMMUT00000022441	Transcript	missense_variant	2136	1759	587	V/M	Gtg/Atg	rs1073814916			-1	ARPP21	VGNC		protein_coding	YES		ENSMMUP00000020994		F7DCJ5.52	UPI0003AB9318	19/22		PANTHER:PTHR15672,PANTHER:PTHR15672:SF14	MODERATE
ARPP21	Mmul_10	2	12014349	12014349	+	Missense_Mutation	SNP	C	C	T	rs1073814916	30186	NORMAL	C	C	ENSMMUT00000022441	19/22	34	20	14	ARPP21,missense_variant,,ENSMMUT00000022441,;ARPP21,missense_variant,,ENSMMUT00000022443,;ARPP21,missense_variant,,ENSMMUT00000062230,;ARPP21,missense_variant,,ENSMMUT00000086043,;ARPP21,missense_variant,,ENSMMUT00000102073,;	T	ENSMMUG00000015959	ENSMMUT00000022441	Transcript	missense_variant	2136	1759	587	V/M	Gtg/Atg	rs1073814916			-1	ARPP21	VGNC		protein_coding	YES		ENSMMUP00000020994		F7DCJ5.52	UPI0003AB9318	19/22		PANTHER:PTHR15672,PANTHER:PTHR15672:SF14	MODERATE
ARPP21	Mmul_10	2	12024347	12024347	+	Missense_Mutation	SNP	G	G	T	rs1078397308	27515	NORMAL	G	G	ENSMMUT00000022441	16/22	21	16	5	ARPP21,missense_variant,,ENSMMUT00000022441,;ARPP21,missense_variant,,ENSMMUT00000022443,;ARPP21,missense_variant,,ENSMMUT00000062230,;ARPP21,missense_variant,,ENSMMUT00000086043,;ARPP21,missense_variant,,ENSMMUT00000102073,;	T	ENSMMUG00000015959	ENSMMUT00000022441	Transcript	missense_variant	1757	1380	460	S/R	agC/agA	rs1078397308			-1	ARPP21	VGNC		protein_coding	YES		ENSMMUP00000020994		F7DCJ5.52	UPI0003AB9318	16/22		PANTHER:PTHR15672,PANTHER:PTHR15672:SF14	MODERATE
ARPP21	Mmul_10	2	12024347	12024347	+	Missense_Mutation	SNP	G	G	T	rs1078397308	27521	NORMAL	G	G	ENSMMUT00000022441	16/22	33	20	13	ARPP21,missense_variant,,ENSMMUT00000022441,;ARPP21,missense_variant,,ENSMMUT00000022443,;ARPP21,missense_variant,,ENSMMUT00000062230,;ARPP21,missense_variant,,ENSMMUT00000086043,;ARPP21,missense_variant,,ENSMMUT00000102073,;	T	ENSMMUG00000015959	ENSMMUT00000022441	Transcript	missense_variant	1757	1380	460	S/R	agC/agA	rs1078397308			-1	ARPP21	VGNC		protein_coding	YES		ENSMMUP00000020994		F7DCJ5.52	UPI0003AB9318	16/22		PANTHER:PTHR15672,PANTHER:PTHR15672:SF14	MODERATE
ARPP21	Mmul_10	2	12024357	12024357	+	Missense_Mutation	SNP	A	A	G	novel	17943	NORMAL	A	A	ENSMMUT00000022441	16/22	24	9	15	ARPP21,missense_variant,,ENSMMUT00000022441,;ARPP21,missense_variant,,ENSMMUT00000022443,;ARPP21,missense_variant,,ENSMMUT00000062230,;ARPP21,missense_variant,,ENSMMUT00000086043,;ARPP21,missense_variant,,ENSMMUT00000102073,;	G	ENSMMUG00000015959	ENSMMUT00000022441	Transcript	missense_variant	1747	1370	457	V/A	gTt/gCt				-1	ARPP21	VGNC		protein_coding	YES		ENSMMUP00000020994		F7DCJ5.52	UPI0003AB9318	16/22		PANTHER:PTHR15672,PANTHER:PTHR15672:SF14	MODERATE
ASCC3	Mmul_10	4	72647142	72647142	+	Missense_Mutation	SNP	G	G	A	rs1074560104	18206	NORMAL	G	G	ENSMMUT00000031353	17/42	33	16	17	ASCC3,missense_variant,,ENSMMUT00000031353,;ASCC3,missense_variant,,ENSMMUT00000031354,;ASCC3,missense_variant,,ENSMMUT00000081695,;ASCC3,missense_variant,,ENSMMUT00000088155,;ASCC3,missense_variant,,ENSMMUT00000097177,;ASCC3,missense_variant,,ENSMMUT00000101364,;	A	ENSMMUG00000022287	ENSMMUT00000031353	Transcript	missense_variant	3136	2815	939	A/T	Gct/Act	rs1074560104			1	ASCC3	VGNC		protein_coding	YES		ENSMMUP00000029337		F6X804.66	UPI00025A21F3	17/42		PANTHER:PTHR24075:SF6,PANTHER:PTHR24075,PIRSF:PIRSF039073,Gene3D:1.10.10.2530,Superfamily:SSF46785	MODERATE
ASCC3	Mmul_10	4	72647142	72647142	+	Missense_Mutation	SNP	G	G	A	rs1074560104	18216	NORMAL	G	G	ENSMMUT00000031353	17/42	25	11	14	ASCC3,missense_variant,,ENSMMUT00000031353,;ASCC3,missense_variant,,ENSMMUT00000031354,;ASCC3,missense_variant,,ENSMMUT00000081695,;ASCC3,missense_variant,,ENSMMUT00000088155,;ASCC3,missense_variant,,ENSMMUT00000097177,;ASCC3,missense_variant,,ENSMMUT00000101364,;	A	ENSMMUG00000022287	ENSMMUT00000031353	Transcript	missense_variant	3136	2815	939	A/T	Gct/Act	rs1074560104			1	ASCC3	VGNC		protein_coding	YES		ENSMMUP00000029337		F6X804.66	UPI00025A21F3	17/42		PANTHER:PTHR24075:SF6,PANTHER:PTHR24075,PIRSF:PIRSF039073,Gene3D:1.10.10.2530,Superfamily:SSF46785	MODERATE
ASCC3	Mmul_10	4	72647142	72647142	+	Missense_Mutation	SNP	G	G	A	rs1074560104	25856	NORMAL	G	G	ENSMMUT00000031353	17/42	37	17	20	ASCC3,missense_variant,,ENSMMUT00000031353,;ASCC3,missense_variant,,ENSMMUT00000031354,;ASCC3,missense_variant,,ENSMMUT00000081695,;ASCC3,missense_variant,,ENSMMUT00000088155,;ASCC3,missense_variant,,ENSMMUT00000097177,;ASCC3,missense_variant,,ENSMMUT00000101364,;	A	ENSMMUG00000022287	ENSMMUT00000031353	Transcript	missense_variant	3136	2815	939	A/T	Gct/Act	rs1074560104			1	ASCC3	VGNC		protein_coding	YES		ENSMMUP00000029337		F6X804.66	UPI00025A21F3	17/42		PANTHER:PTHR24075:SF6,PANTHER:PTHR24075,PIRSF:PIRSF039073,Gene3D:1.10.10.2530,Superfamily:SSF46785	MODERATE
ASCC3	Mmul_10	4	72647142	72647142	+	Missense_Mutation	SNP	G	G	A	rs1074560104	26537	NORMAL	G	G	ENSMMUT00000031353	17/42	24	12	12	ASCC3,missense_variant,,ENSMMUT00000031353,;ASCC3,missense_variant,,ENSMMUT00000031354,;ASCC3,missense_variant,,ENSMMUT00000081695,;ASCC3,missense_variant,,ENSMMUT00000088155,;ASCC3,missense_variant,,ENSMMUT00000097177,;ASCC3,missense_variant,,ENSMMUT00000101364,;	A	ENSMMUG00000022287	ENSMMUT00000031353	Transcript	missense_variant	3136	2815	939	A/T	Gct/Act	rs1074560104			1	ASCC3	VGNC		protein_coding	YES		ENSMMUP00000029337		F6X804.66	UPI00025A21F3	17/42		PANTHER:PTHR24075:SF6,PANTHER:PTHR24075,PIRSF:PIRSF039073,Gene3D:1.10.10.2530,Superfamily:SSF46785	MODERATE
ASIC3	Mmul_10	3	177050971	177050971	+	Missense_Mutation	SNP	G	G	A	novel	17944	NORMAL	G	G	ENSMMUT00000028774	1/11	26	11	15	ASIC3,missense_variant,,ENSMMUT00000028774,;ABCB8,downstream_gene_variant,,ENSMMUT00000028769,;CDK5,downstream_gene_variant,,ENSMMUT00000028778,;CDK5,downstream_gene_variant,,ENSMMUT00000028779,;ABCB8,downstream_gene_variant,,ENSMMUT00000041551,;ABCB8,downstream_gene_variant,,ENSMMUT00000041552,;	A	ENSMMUG00000045082	ENSMMUT00000028774	Transcript	missense_variant	53	53	18	R/H	cGc/cAc				1	ASIC3	VGNC		protein_coding	YES		ENSMMUP00000026926		F6W6L6.53	UPI00006D3784	1/11		PANTHER:PTHR11690,PANTHER:PTHR11690:SF228	MODERATE
ASIC3	Mmul_10	3	177053339	177053340	+	Nonsense_Mutation	INS	-	CGCGTGAGCTGTGCGGGGCGGGCGGGCTCCTC	CGCGTGAGCTGTGCGGGGCGGGCGGGCTCCTC	novel	17893	NORMAL	-	-	ENSMMUT00000028774	6/11	34	0	34	ASIC3,stop_gained,,ENSMMUT00000028774,;CDK5,downstream_gene_variant,,ENSMMUT00000028778,;CDK5,downstream_gene_variant,,ENSMMUT00000028779,;	CGCGTGAGCTGTGCGGGGCGGGCGGGCTCCTC	ENSMMUG00000045082	ENSMMUT00000028774	Transcript	stop_gained,frameshift_variant	1205-1206	1205-1206	402	I/IA*AVRGGRAPX	atc/atCGCGTGAGCTGTGCGGGGCGGGCGGGCTCCTCc				1	ASIC3	VGNC		protein_coding	YES		ENSMMUP00000026926		F6W6L6.53	UPI00006D3784	6/11		Gene3D:1.10.287.770,Gene3D:2.60.470.10,Pfam:PF00858,PANTHER:PTHR11690,PANTHER:PTHR11690:SF228,TIGRFAM:TIGR00859	HIGH
ASIC3	Mmul_10	3	177053339	177053340	+	Nonsense_Mutation	INS	-	CGCGTGAGCTGTGCGGGGCGGGCGGGCTCCTC	CGCGTGAGCTGTGCGGGGCGGGCGGGCTCCTC	novel	17943	NORMAL	-	-	ENSMMUT00000028774	6/11	33	0	33	ASIC3,stop_gained,,ENSMMUT00000028774,;CDK5,downstream_gene_variant,,ENSMMUT00000028778,;CDK5,downstream_gene_variant,,ENSMMUT00000028779,;	CGCGTGAGCTGTGCGGGGCGGGCGGGCTCCTC	ENSMMUG00000045082	ENSMMUT00000028774	Transcript	stop_gained,frameshift_variant	1205-1206	1205-1206	402	I/IA*AVRGGRAPX	atc/atCGCGTGAGCTGTGCGGGGCGGGCGGGCTCCTCc				1	ASIC3	VGNC		protein_coding	YES		ENSMMUP00000026926		F6W6L6.53	UPI00006D3784	6/11		Gene3D:1.10.287.770,Gene3D:2.60.470.10,Pfam:PF00858,PANTHER:PTHR11690,PANTHER:PTHR11690:SF228,TIGRFAM:TIGR00859	HIGH
ASIC3	Mmul_10	3	177053339	177053340	+	Nonsense_Mutation	INS	-	CGCGTGAGCTGTGCGGGGCGGGCGGGCTCCTC	CGCGTGAGCTGTGCGGGGCGGGCGGGCTCCTC	novel	17944	NORMAL	-	-	ENSMMUT00000028774	6/11	34	0	34	ASIC3,stop_gained,,ENSMMUT00000028774,;CDK5,downstream_gene_variant,,ENSMMUT00000028778,;CDK5,downstream_gene_variant,,ENSMMUT00000028779,;	CGCGTGAGCTGTGCGGGGCGGGCGGGCTCCTC	ENSMMUG00000045082	ENSMMUT00000028774	Transcript	stop_gained,frameshift_variant	1205-1206	1205-1206	402	I/IA*AVRGGRAPX	atc/atCGCGTGAGCTGTGCGGGGCGGGCGGGCTCCTCc				1	ASIC3	VGNC		protein_coding	YES		ENSMMUP00000026926		F6W6L6.53	UPI00006D3784	6/11		Gene3D:1.10.287.770,Gene3D:2.60.470.10,Pfam:PF00858,PANTHER:PTHR11690,PANTHER:PTHR11690:SF228,TIGRFAM:TIGR00859	HIGH
ASIC3	Mmul_10	3	177053339	177053340	+	Nonsense_Mutation	INS	-	CGCGTGAGCTGTGCGGGGCGGGCGGGCTCCTC	CGCGTGAGCTGTGCGGGGCGGGCGGGCTCCTC	novel	17979	NORMAL	-	-	ENSMMUT00000028774	6/11	24	0	24	ASIC3,stop_gained,,ENSMMUT00000028774,;CDK5,downstream_gene_variant,,ENSMMUT00000028778,;CDK5,downstream_gene_variant,,ENSMMUT00000028779,;	CGCGTGAGCTGTGCGGGGCGGGCGGGCTCCTC	ENSMMUG00000045082	ENSMMUT00000028774	Transcript	stop_gained,frameshift_variant	1205-1206	1205-1206	402	I/IA*AVRGGRAPX	atc/atCGCGTGAGCTGTGCGGGGCGGGCGGGCTCCTCc				1	ASIC3	VGNC		protein_coding	YES		ENSMMUP00000026926		F6W6L6.53	UPI00006D3784	6/11		Gene3D:1.10.287.770,Gene3D:2.60.470.10,Pfam:PF00858,PANTHER:PTHR11690,PANTHER:PTHR11690:SF228,TIGRFAM:TIGR00859	HIGH
ASIC3	Mmul_10	3	177053339	177053340	+	Nonsense_Mutation	INS	-	CGCGTGAGCTGTGCGGGGCGGGCGGGCTCCTC	CGCGTGAGCTGTGCGGGGCGGGCGGGCTCCTC	novel	18095	NORMAL	-	-	ENSMMUT00000028774	6/11	54	0	54	ASIC3,stop_gained,,ENSMMUT00000028774,;CDK5,downstream_gene_variant,,ENSMMUT00000028778,;CDK5,downstream_gene_variant,,ENSMMUT00000028779,;	CGCGTGAGCTGTGCGGGGCGGGCGGGCTCCTC	ENSMMUG00000045082	ENSMMUT00000028774	Transcript	stop_gained,frameshift_variant	1205-1206	1205-1206	402	I/IA*AVRGGRAPX	atc/atCGCGTGAGCTGTGCGGGGCGGGCGGGCTCCTCc				1	ASIC3	VGNC		protein_coding	YES		ENSMMUP00000026926		F6W6L6.53	UPI00006D3784	6/11		Gene3D:1.10.287.770,Gene3D:2.60.470.10,Pfam:PF00858,PANTHER:PTHR11690,PANTHER:PTHR11690:SF228,TIGRFAM:TIGR00859	HIGH
ASIC3	Mmul_10	3	177053339	177053340	+	Nonsense_Mutation	INS	-	CGCGTGAGCTGTGCGGGGCGGGCGGGCTCCTC	CGCGTGAGCTGTGCGGGGCGGGCGGGCTCCTC	novel	18100	NORMAL	-	-	ENSMMUT00000028774	6/11	32	0	32	ASIC3,stop_gained,,ENSMMUT00000028774,;CDK5,downstream_gene_variant,,ENSMMUT00000028778,;CDK5,downstream_gene_variant,,ENSMMUT00000028779,;	CGCGTGAGCTGTGCGGGGCGGGCGGGCTCCTC	ENSMMUG00000045082	ENSMMUT00000028774	Transcript	stop_gained,frameshift_variant	1205-1206	1205-1206	402	I/IA*AVRGGRAPX	atc/atCGCGTGAGCTGTGCGGGGCGGGCGGGCTCCTCc				1	ASIC3	VGNC		protein_coding	YES		ENSMMUP00000026926		F6W6L6.53	UPI00006D3784	6/11		Gene3D:1.10.287.770,Gene3D:2.60.470.10,Pfam:PF00858,PANTHER:PTHR11690,PANTHER:PTHR11690:SF228,TIGRFAM:TIGR00859	HIGH
ASIC3	Mmul_10	3	177053339	177053340	+	Nonsense_Mutation	INS	-	CGCGTGAGCTGTGCGGGGCGGGCGGGCTCCTC	CGCGTGAGCTGTGCGGGGCGGGCGGGCTCCTC	novel	18111	NORMAL	-	-	ENSMMUT00000028774	6/11	25	0	25	ASIC3,stop_gained,,ENSMMUT00000028774,;CDK5,downstream_gene_variant,,ENSMMUT00000028778,;CDK5,downstream_gene_variant,,ENSMMUT00000028779,;	CGCGTGAGCTGTGCGGGGCGGGCGGGCTCCTC	ENSMMUG00000045082	ENSMMUT00000028774	Transcript	stop_gained,frameshift_variant	1205-1206	1205-1206	402	I/IA*AVRGGRAPX	atc/atCGCGTGAGCTGTGCGGGGCGGGCGGGCTCCTCc				1	ASIC3	VGNC		protein_coding	YES		ENSMMUP00000026926		F6W6L6.53	UPI00006D3784	6/11		Gene3D:1.10.287.770,Gene3D:2.60.470.10,Pfam:PF00858,PANTHER:PTHR11690,PANTHER:PTHR11690:SF228,TIGRFAM:TIGR00859	HIGH
ASIC3	Mmul_10	3	177053339	177053340	+	Nonsense_Mutation	INS	-	CGCGTGAGCTGTGCGGGGCGGGCGGGCTCCTC	CGCGTGAGCTGTGCGGGGCGGGCGGGCTCCTC	novel	18129	NORMAL	-	-	ENSMMUT00000028774	6/11	37	0	37	ASIC3,stop_gained,,ENSMMUT00000028774,;CDK5,downstream_gene_variant,,ENSMMUT00000028778,;CDK5,downstream_gene_variant,,ENSMMUT00000028779,;	CGCGTGAGCTGTGCGGGGCGGGCGGGCTCCTC	ENSMMUG00000045082	ENSMMUT00000028774	Transcript	stop_gained,frameshift_variant	1205-1206	1205-1206	402	I/IA*AVRGGRAPX	atc/atCGCGTGAGCTGTGCGGGGCGGGCGGGCTCCTCc				1	ASIC3	VGNC		protein_coding	YES		ENSMMUP00000026926		F6W6L6.53	UPI00006D3784	6/11		Gene3D:1.10.287.770,Gene3D:2.60.470.10,Pfam:PF00858,PANTHER:PTHR11690,PANTHER:PTHR11690:SF228,TIGRFAM:TIGR00859	HIGH
ASIC3	Mmul_10	3	177053339	177053340	+	Nonsense_Mutation	INS	-	CGCGTGAGCTGTGCGGGGCGGGCGGGCTCCTC	CGCGTGAGCTGTGCGGGGCGGGCGGGCTCCTC	novel	18133	NORMAL	-	-	ENSMMUT00000028774	6/11	28	0	28	ASIC3,stop_gained,,ENSMMUT00000028774,;CDK5,downstream_gene_variant,,ENSMMUT00000028778,;CDK5,downstream_gene_variant,,ENSMMUT00000028779,;	CGCGTGAGCTGTGCGGGGCGGGCGGGCTCCTC	ENSMMUG00000045082	ENSMMUT00000028774	Transcript	stop_gained,frameshift_variant	1205-1206	1205-1206	402	I/IA*AVRGGRAPX	atc/atCGCGTGAGCTGTGCGGGGCGGGCGGGCTCCTCc				1	ASIC3	VGNC		protein_coding	YES		ENSMMUP00000026926		F6W6L6.53	UPI00006D3784	6/11		Gene3D:1.10.287.770,Gene3D:2.60.470.10,Pfam:PF00858,PANTHER:PTHR11690,PANTHER:PTHR11690:SF228,TIGRFAM:TIGR00859	HIGH
ASIC3	Mmul_10	3	177053339	177053340	+	Nonsense_Mutation	INS	-	CGCGTGAGCTGTGCGGGGCGGGCGGGCTCCTC	CGCGTGAGCTGTGCGGGGCGGGCGGGCTCCTC	novel	18147	NORMAL	-	-	ENSMMUT00000028774	6/11	24	0	24	ASIC3,stop_gained,,ENSMMUT00000028774,;CDK5,downstream_gene_variant,,ENSMMUT00000028778,;CDK5,downstream_gene_variant,,ENSMMUT00000028779,;	CGCGTGAGCTGTGCGGGGCGGGCGGGCTCCTC	ENSMMUG00000045082	ENSMMUT00000028774	Transcript	stop_gained,frameshift_variant	1205-1206	1205-1206	402	I/IA*AVRGGRAPX	atc/atCGCGTGAGCTGTGCGGGGCGGGCGGGCTCCTCc				1	ASIC3	VGNC		protein_coding	YES		ENSMMUP00000026926		F6W6L6.53	UPI00006D3784	6/11		Gene3D:1.10.287.770,Gene3D:2.60.470.10,Pfam:PF00858,PANTHER:PTHR11690,PANTHER:PTHR11690:SF228,TIGRFAM:TIGR00859	HIGH
ASIC3	Mmul_10	3	177053339	177053340	+	Nonsense_Mutation	INS	-	CGCGTGAGCTGTGCGGGGCGGGCGGGCTCCTC	CGCGTGAGCTGTGCGGGGCGGGCGGGCTCCTC	novel	18201	NORMAL	-	-	ENSMMUT00000028774	6/11	41	0	41	ASIC3,stop_gained,,ENSMMUT00000028774,;CDK5,downstream_gene_variant,,ENSMMUT00000028778,;CDK5,downstream_gene_variant,,ENSMMUT00000028779,;	CGCGTGAGCTGTGCGGGGCGGGCGGGCTCCTC	ENSMMUG00000045082	ENSMMUT00000028774	Transcript	stop_gained,frameshift_variant	1205-1206	1205-1206	402	I/IA*AVRGGRAPX	atc/atCGCGTGAGCTGTGCGGGGCGGGCGGGCTCCTCc				1	ASIC3	VGNC		protein_coding	YES		ENSMMUP00000026926		F6W6L6.53	UPI00006D3784	6/11		Gene3D:1.10.287.770,Gene3D:2.60.470.10,Pfam:PF00858,PANTHER:PTHR11690,PANTHER:PTHR11690:SF228,TIGRFAM:TIGR00859	HIGH
ASIC3	Mmul_10	3	177053339	177053340	+	Nonsense_Mutation	INS	-	CGCGTGAGCTGTGCGGGGCGGGCGGGCTCCTC	CGCGTGAGCTGTGCGGGGCGGGCGGGCTCCTC	novel	18210	NORMAL	-	-	ENSMMUT00000028774	6/11	23	0	23	ASIC3,stop_gained,,ENSMMUT00000028774,;CDK5,downstream_gene_variant,,ENSMMUT00000028778,;CDK5,downstream_gene_variant,,ENSMMUT00000028779,;	CGCGTGAGCTGTGCGGGGCGGGCGGGCTCCTC	ENSMMUG00000045082	ENSMMUT00000028774	Transcript	stop_gained,frameshift_variant	1205-1206	1205-1206	402	I/IA*AVRGGRAPX	atc/atCGCGTGAGCTGTGCGGGGCGGGCGGGCTCCTCc				1	ASIC3	VGNC		protein_coding	YES		ENSMMUP00000026926		F6W6L6.53	UPI00006D3784	6/11		Gene3D:1.10.287.770,Gene3D:2.60.470.10,Pfam:PF00858,PANTHER:PTHR11690,PANTHER:PTHR11690:SF228,TIGRFAM:TIGR00859	HIGH
ASIC3	Mmul_10	3	177053339	177053340	+	Nonsense_Mutation	INS	-	CGCGTGAGCTGTGCGGGGCGGGCGGGCTCCTC	CGCGTGAGCTGTGCGGGGCGGGCGGGCTCCTC	novel	21847	NORMAL	-	-	ENSMMUT00000028774	6/11	29	0	29	ASIC3,stop_gained,,ENSMMUT00000028774,;CDK5,downstream_gene_variant,,ENSMMUT00000028778,;CDK5,downstream_gene_variant,,ENSMMUT00000028779,;	CGCGTGAGCTGTGCGGGGCGGGCGGGCTCCTC	ENSMMUG00000045082	ENSMMUT00000028774	Transcript	stop_gained,frameshift_variant	1205-1206	1205-1206	402	I/IA*AVRGGRAPX	atc/atCGCGTGAGCTGTGCGGGGCGGGCGGGCTCCTCc				1	ASIC3	VGNC		protein_coding	YES		ENSMMUP00000026926		F6W6L6.53	UPI00006D3784	6/11		Gene3D:1.10.287.770,Gene3D:2.60.470.10,Pfam:PF00858,PANTHER:PTHR11690,PANTHER:PTHR11690:SF228,TIGRFAM:TIGR00859	HIGH
ASIC3	Mmul_10	3	177053339	177053340	+	Nonsense_Mutation	INS	-	CGCGTGAGCTGTGCGGGGCGGGCGGGCTCCTC	CGCGTGAGCTGTGCGGGGCGGGCGGGCTCCTC	novel	23813	NORMAL	-	-	ENSMMUT00000028774	6/11	34	0	34	ASIC3,stop_gained,,ENSMMUT00000028774,;CDK5,downstream_gene_variant,,ENSMMUT00000028778,;CDK5,downstream_gene_variant,,ENSMMUT00000028779,;	CGCGTGAGCTGTGCGGGGCGGGCGGGCTCCTC	ENSMMUG00000045082	ENSMMUT00000028774	Transcript	stop_gained,frameshift_variant	1205-1206	1205-1206	402	I/IA*AVRGGRAPX	atc/atCGCGTGAGCTGTGCGGGGCGGGCGGGCTCCTCc				1	ASIC3	VGNC		protein_coding	YES		ENSMMUP00000026926		F6W6L6.53	UPI00006D3784	6/11		Gene3D:1.10.287.770,Gene3D:2.60.470.10,Pfam:PF00858,PANTHER:PTHR11690,PANTHER:PTHR11690:SF228,TIGRFAM:TIGR00859	HIGH
ASIC3	Mmul_10	3	177053339	177053340	+	Nonsense_Mutation	INS	-	CGCGTGAGCTGTGCGGGGCGGGCGGGCTCCTC	CGCGTGAGCTGTGCGGGGCGGGCGGGCTCCTC	novel	25329	NORMAL	-	-	ENSMMUT00000028774	6/11	26	0	26	ASIC3,stop_gained,,ENSMMUT00000028774,;CDK5,downstream_gene_variant,,ENSMMUT00000028778,;CDK5,downstream_gene_variant,,ENSMMUT00000028779,;	CGCGTGAGCTGTGCGGGGCGGGCGGGCTCCTC	ENSMMUG00000045082	ENSMMUT00000028774	Transcript	stop_gained,frameshift_variant	1205-1206	1205-1206	402	I/IA*AVRGGRAPX	atc/atCGCGTGAGCTGTGCGGGGCGGGCGGGCTCCTCc				1	ASIC3	VGNC		protein_coding	YES		ENSMMUP00000026926		F6W6L6.53	UPI00006D3784	6/11		Gene3D:1.10.287.770,Gene3D:2.60.470.10,Pfam:PF00858,PANTHER:PTHR11690,PANTHER:PTHR11690:SF228,TIGRFAM:TIGR00859	HIGH
ASIC3	Mmul_10	3	177053339	177053340	+	Nonsense_Mutation	INS	-	CGCGTGAGCTGTGCGGGGCGGGCGGGCTCCTC	CGCGTGAGCTGTGCGGGGCGGGCGGGCTCCTC	novel	25856	NORMAL	-	-	ENSMMUT00000028774	6/11	41	0	41	ASIC3,stop_gained,,ENSMMUT00000028774,;CDK5,downstream_gene_variant,,ENSMMUT00000028778,;CDK5,downstream_gene_variant,,ENSMMUT00000028779,;	CGCGTGAGCTGTGCGGGGCGGGCGGGCTCCTC	ENSMMUG00000045082	ENSMMUT00000028774	Transcript	stop_gained,frameshift_variant	1205-1206	1205-1206	402	I/IA*AVRGGRAPX	atc/atCGCGTGAGCTGTGCGGGGCGGGCGGGCTCCTCc				1	ASIC3	VGNC		protein_coding	YES		ENSMMUP00000026926		F6W6L6.53	UPI00006D3784	6/11		Gene3D:1.10.287.770,Gene3D:2.60.470.10,Pfam:PF00858,PANTHER:PTHR11690,PANTHER:PTHR11690:SF228,TIGRFAM:TIGR00859	HIGH
ASIC3	Mmul_10	3	177053339	177053340	+	Nonsense_Mutation	INS	-	CGCGTGAGCTGTGCGGGGCGGGCGGGCTCCTC	CGCGTGAGCTGTGCGGGGCGGGCGGGCTCCTC	novel	27513	NORMAL	-	-	ENSMMUT00000028774	6/11	33	0	33	ASIC3,stop_gained,,ENSMMUT00000028774,;CDK5,downstream_gene_variant,,ENSMMUT00000028778,;CDK5,downstream_gene_variant,,ENSMMUT00000028779,;	CGCGTGAGCTGTGCGGGGCGGGCGGGCTCCTC	ENSMMUG00000045082	ENSMMUT00000028774	Transcript	stop_gained,frameshift_variant	1205-1206	1205-1206	402	I/IA*AVRGGRAPX	atc/atCGCGTGAGCTGTGCGGGGCGGGCGGGCTCCTCc				1	ASIC3	VGNC		protein_coding	YES		ENSMMUP00000026926		F6W6L6.53	UPI00006D3784	6/11		Gene3D:1.10.287.770,Gene3D:2.60.470.10,Pfam:PF00858,PANTHER:PTHR11690,PANTHER:PTHR11690:SF228,TIGRFAM:TIGR00859	HIGH
ASIC3	Mmul_10	3	177053339	177053340	+	Nonsense_Mutation	INS	-	CGCGTGAGCTGTGCGGGGCGGGCGGGCTCCTC	CGCGTGAGCTGTGCGGGGCGGGCGGGCTCCTC	novel	27536	NORMAL	-	-	ENSMMUT00000028774	6/11	30	0	30	ASIC3,stop_gained,,ENSMMUT00000028774,;CDK5,downstream_gene_variant,,ENSMMUT00000028778,;CDK5,downstream_gene_variant,,ENSMMUT00000028779,;	CGCGTGAGCTGTGCGGGGCGGGCGGGCTCCTC	ENSMMUG00000045082	ENSMMUT00000028774	Transcript	stop_gained,frameshift_variant	1205-1206	1205-1206	402	I/IA*AVRGGRAPX	atc/atCGCGTGAGCTGTGCGGGGCGGGCGGGCTCCTCc				1	ASIC3	VGNC		protein_coding	YES		ENSMMUP00000026926		F6W6L6.53	UPI00006D3784	6/11		Gene3D:1.10.287.770,Gene3D:2.60.470.10,Pfam:PF00858,PANTHER:PTHR11690,PANTHER:PTHR11690:SF228,TIGRFAM:TIGR00859	HIGH
ASIC3	Mmul_10	3	177053339	177053340	+	Nonsense_Mutation	INS	-	CGCGTGAGCTGTGCGGGGCGGGCGGGCTCCTC	CGCGTGAGCTGTGCGGGGCGGGCGGGCTCCTC	novel	29976	NORMAL	-	-	ENSMMUT00000028774	6/11	26	0	26	ASIC3,stop_gained,,ENSMMUT00000028774,;CDK5,downstream_gene_variant,,ENSMMUT00000028778,;CDK5,downstream_gene_variant,,ENSMMUT00000028779,;	CGCGTGAGCTGTGCGGGGCGGGCGGGCTCCTC	ENSMMUG00000045082	ENSMMUT00000028774	Transcript	stop_gained,frameshift_variant	1205-1206	1205-1206	402	I/IA*AVRGGRAPX	atc/atCGCGTGAGCTGTGCGGGGCGGGCGGGCTCCTCc				1	ASIC3	VGNC		protein_coding	YES		ENSMMUP00000026926		F6W6L6.53	UPI00006D3784	6/11		Gene3D:1.10.287.770,Gene3D:2.60.470.10,Pfam:PF00858,PANTHER:PTHR11690,PANTHER:PTHR11690:SF228,TIGRFAM:TIGR00859	HIGH
ASIC3	Mmul_10	3	177053339	177053340	+	Nonsense_Mutation	INS	-	CGCGTGAGCTGTGCGGGGCGGGCGGGCTCCTC	CGCGTGAGCTGTGCGGGGCGGGCGGGCTCCTC	novel	30186	NORMAL	-	-	ENSMMUT00000028774	6/11	41	0	41	ASIC3,stop_gained,,ENSMMUT00000028774,;CDK5,downstream_gene_variant,,ENSMMUT00000028778,;CDK5,downstream_gene_variant,,ENSMMUT00000028779,;	CGCGTGAGCTGTGCGGGGCGGGCGGGCTCCTC	ENSMMUG00000045082	ENSMMUT00000028774	Transcript	stop_gained,frameshift_variant	1205-1206	1205-1206	402	I/IA*AVRGGRAPX	atc/atCGCGTGAGCTGTGCGGGGCGGGCGGGCTCCTCc				1	ASIC3	VGNC		protein_coding	YES		ENSMMUP00000026926		F6W6L6.53	UPI00006D3784	6/11		Gene3D:1.10.287.770,Gene3D:2.60.470.10,Pfam:PF00858,PANTHER:PTHR11690,PANTHER:PTHR11690:SF228,TIGRFAM:TIGR00859	HIGH
ASIC3	Mmul_10	3	177053339	177053340	+	Nonsense_Mutation	INS	-	-	CGCGTGAGCTGTGCGGGGCGGGCGGGCTCCTC	novel	17573	NORMAL	-	-	ENSMMUT00000028774	6/11	24	12	12	ASIC3,stop_gained,,ENSMMUT00000028774,;CDK5,downstream_gene_variant,,ENSMMUT00000028778,;CDK5,downstream_gene_variant,,ENSMMUT00000028779,;	CGCGTGAGCTGTGCGGGGCGGGCGGGCTCCTC	ENSMMUG00000045082	ENSMMUT00000028774	Transcript	stop_gained,frameshift_variant	1205-1206	1205-1206	402	I/IA*AVRGGRAPX	atc/atCGCGTGAGCTGTGCGGGGCGGGCGGGCTCCTCc				1	ASIC3	VGNC		protein_coding	YES		ENSMMUP00000026926		F6W6L6.53	UPI00006D3784	6/11		Gene3D:1.10.287.770,Gene3D:2.60.470.10,Pfam:PF00858,PANTHER:PTHR11690,PANTHER:PTHR11690:SF228,TIGRFAM:TIGR00859	HIGH
ASIC3	Mmul_10	3	177053339	177053340	+	Nonsense_Mutation	INS	-	-	CGCGTGAGCTGTGCGGGGCGGGCGGGCTCCTC	novel	17694	NORMAL	-	-	ENSMMUT00000028774	6/11	30	14	16	ASIC3,stop_gained,,ENSMMUT00000028774,;CDK5,downstream_gene_variant,,ENSMMUT00000028778,;CDK5,downstream_gene_variant,,ENSMMUT00000028779,;	CGCGTGAGCTGTGCGGGGCGGGCGGGCTCCTC	ENSMMUG00000045082	ENSMMUT00000028774	Transcript	stop_gained,frameshift_variant	1205-1206	1205-1206	402	I/IA*AVRGGRAPX	atc/atCGCGTGAGCTGTGCGGGGCGGGCGGGCTCCTCc				1	ASIC3	VGNC		protein_coding	YES		ENSMMUP00000026926		F6W6L6.53	UPI00006D3784	6/11		Gene3D:1.10.287.770,Gene3D:2.60.470.10,Pfam:PF00858,PANTHER:PTHR11690,PANTHER:PTHR11690:SF228,TIGRFAM:TIGR00859	HIGH
ASIC3	Mmul_10	3	177053339	177053340	+	Nonsense_Mutation	INS	-	-	CGCGTGAGCTGTGCGGGGCGGGCGGGCTCCTC	novel	17874	NORMAL	-	-	ENSMMUT00000028774	6/11	26	11	15	ASIC3,stop_gained,,ENSMMUT00000028774,;CDK5,downstream_gene_variant,,ENSMMUT00000028778,;CDK5,downstream_gene_variant,,ENSMMUT00000028779,;	CGCGTGAGCTGTGCGGGGCGGGCGGGCTCCTC	ENSMMUG00000045082	ENSMMUT00000028774	Transcript	stop_gained,frameshift_variant	1205-1206	1205-1206	402	I/IA*AVRGGRAPX	atc/atCGCGTGAGCTGTGCGGGGCGGGCGGGCTCCTCc				1	ASIC3	VGNC		protein_coding	YES		ENSMMUP00000026926		F6W6L6.53	UPI00006D3784	6/11		Gene3D:1.10.287.770,Gene3D:2.60.470.10,Pfam:PF00858,PANTHER:PTHR11690,PANTHER:PTHR11690:SF228,TIGRFAM:TIGR00859	HIGH
ASIC3	Mmul_10	3	177053339	177053340	+	Nonsense_Mutation	INS	-	-	CGCGTGAGCTGTGCGGGGCGGGCGGGCTCCTC	novel	18008	NORMAL	-	-	ENSMMUT00000028774	6/11	31	14	17	ASIC3,stop_gained,,ENSMMUT00000028774,;CDK5,downstream_gene_variant,,ENSMMUT00000028778,;CDK5,downstream_gene_variant,,ENSMMUT00000028779,;	CGCGTGAGCTGTGCGGGGCGGGCGGGCTCCTC	ENSMMUG00000045082	ENSMMUT00000028774	Transcript	stop_gained,frameshift_variant	1205-1206	1205-1206	402	I/IA*AVRGGRAPX	atc/atCGCGTGAGCTGTGCGGGGCGGGCGGGCTCCTCc				1	ASIC3	VGNC		protein_coding	YES		ENSMMUP00000026926		F6W6L6.53	UPI00006D3784	6/11		Gene3D:1.10.287.770,Gene3D:2.60.470.10,Pfam:PF00858,PANTHER:PTHR11690,PANTHER:PTHR11690:SF228,TIGRFAM:TIGR00859	HIGH
ASIC3	Mmul_10	3	177053339	177053340	+	Nonsense_Mutation	INS	-	-	CGCGTGAGCTGTGCGGGGCGGGCGGGCTCCTC	novel	18022	NORMAL	-	-	ENSMMUT00000028774	6/11	35	17	18	ASIC3,stop_gained,,ENSMMUT00000028774,;CDK5,downstream_gene_variant,,ENSMMUT00000028778,;CDK5,downstream_gene_variant,,ENSMMUT00000028779,;	CGCGTGAGCTGTGCGGGGCGGGCGGGCTCCTC	ENSMMUG00000045082	ENSMMUT00000028774	Transcript	stop_gained,frameshift_variant	1205-1206	1205-1206	402	I/IA*AVRGGRAPX	atc/atCGCGTGAGCTGTGCGGGGCGGGCGGGCTCCTCc				1	ASIC3	VGNC		protein_coding	YES		ENSMMUP00000026926		F6W6L6.53	UPI00006D3784	6/11		Gene3D:1.10.287.770,Gene3D:2.60.470.10,Pfam:PF00858,PANTHER:PTHR11690,PANTHER:PTHR11690:SF228,TIGRFAM:TIGR00859	HIGH
ASIC3	Mmul_10	3	177053339	177053340	+	Nonsense_Mutation	INS	-	-	CGCGTGAGCTGTGCGGGGCGGGCGGGCTCCTC	novel	18057	NORMAL	-	-	ENSMMUT00000028774	6/11	33	13	20	ASIC3,stop_gained,,ENSMMUT00000028774,;CDK5,downstream_gene_variant,,ENSMMUT00000028778,;CDK5,downstream_gene_variant,,ENSMMUT00000028779,;	CGCGTGAGCTGTGCGGGGCGGGCGGGCTCCTC	ENSMMUG00000045082	ENSMMUT00000028774	Transcript	stop_gained,frameshift_variant	1205-1206	1205-1206	402	I/IA*AVRGGRAPX	atc/atCGCGTGAGCTGTGCGGGGCGGGCGGGCTCCTCc				1	ASIC3	VGNC		protein_coding	YES		ENSMMUP00000026926		F6W6L6.53	UPI00006D3784	6/11		Gene3D:1.10.287.770,Gene3D:2.60.470.10,Pfam:PF00858,PANTHER:PTHR11690,PANTHER:PTHR11690:SF228,TIGRFAM:TIGR00859	HIGH
ASIC3	Mmul_10	3	177053339	177053340	+	Nonsense_Mutation	INS	-	-	CGCGTGAGCTGTGCGGGGCGGGCGGGCTCCTC	novel	18087	NORMAL	-	-	ENSMMUT00000028774	6/11	20	8	12	ASIC3,stop_gained,,ENSMMUT00000028774,;CDK5,downstream_gene_variant,,ENSMMUT00000028778,;CDK5,downstream_gene_variant,,ENSMMUT00000028779,;	CGCGTGAGCTGTGCGGGGCGGGCGGGCTCCTC	ENSMMUG00000045082	ENSMMUT00000028774	Transcript	stop_gained,frameshift_variant	1205-1206	1205-1206	402	I/IA*AVRGGRAPX	atc/atCGCGTGAGCTGTGCGGGGCGGGCGGGCTCCTCc				1	ASIC3	VGNC		protein_coding	YES		ENSMMUP00000026926		F6W6L6.53	UPI00006D3784	6/11		Gene3D:1.10.287.770,Gene3D:2.60.470.10,Pfam:PF00858,PANTHER:PTHR11690,PANTHER:PTHR11690:SF228,TIGRFAM:TIGR00859	HIGH
ASIC3	Mmul_10	3	177053339	177053340	+	Nonsense_Mutation	INS	-	-	CGCGTGAGCTGTGCGGGGCGGGCGGGCTCCTC	novel	18090	NORMAL	-	-	ENSMMUT00000028774	6/11	34	14	20	ASIC3,stop_gained,,ENSMMUT00000028774,;CDK5,downstream_gene_variant,,ENSMMUT00000028778,;CDK5,downstream_gene_variant,,ENSMMUT00000028779,;	CGCGTGAGCTGTGCGGGGCGGGCGGGCTCCTC	ENSMMUG00000045082	ENSMMUT00000028774	Transcript	stop_gained,frameshift_variant	1205-1206	1205-1206	402	I/IA*AVRGGRAPX	atc/atCGCGTGAGCTGTGCGGGGCGGGCGGGCTCCTCc				1	ASIC3	VGNC		protein_coding	YES		ENSMMUP00000026926		F6W6L6.53	UPI00006D3784	6/11		Gene3D:1.10.287.770,Gene3D:2.60.470.10,Pfam:PF00858,PANTHER:PTHR11690,PANTHER:PTHR11690:SF228,TIGRFAM:TIGR00859	HIGH
ASIC3	Mmul_10	3	177053339	177053340	+	Nonsense_Mutation	INS	-	-	CGCGTGAGCTGTGCGGGGCGGGCGGGCTCCTC	novel	18098	NORMAL	-	-	ENSMMUT00000028774	6/11	21	5	16	ASIC3,stop_gained,,ENSMMUT00000028774,;CDK5,downstream_gene_variant,,ENSMMUT00000028778,;CDK5,downstream_gene_variant,,ENSMMUT00000028779,;	CGCGTGAGCTGTGCGGGGCGGGCGGGCTCCTC	ENSMMUG00000045082	ENSMMUT00000028774	Transcript	stop_gained,frameshift_variant	1205-1206	1205-1206	402	I/IA*AVRGGRAPX	atc/atCGCGTGAGCTGTGCGGGGCGGGCGGGCTCCTCc				1	ASIC3	VGNC		protein_coding	YES		ENSMMUP00000026926		F6W6L6.53	UPI00006D3784	6/11		Gene3D:1.10.287.770,Gene3D:2.60.470.10,Pfam:PF00858,PANTHER:PTHR11690,PANTHER:PTHR11690:SF228,TIGRFAM:TIGR00859	HIGH
ASIC3	Mmul_10	3	177053339	177053340	+	Nonsense_Mutation	INS	-	-	CGCGTGAGCTGTGCGGGGCGGGCGGGCTCCTC	novel	18112	NORMAL	-	-	ENSMMUT00000028774	6/11	30	12	18	ASIC3,stop_gained,,ENSMMUT00000028774,;CDK5,downstream_gene_variant,,ENSMMUT00000028778,;CDK5,downstream_gene_variant,,ENSMMUT00000028779,;	CGCGTGAGCTGTGCGGGGCGGGCGGGCTCCTC	ENSMMUG00000045082	ENSMMUT00000028774	Transcript	stop_gained,frameshift_variant	1205-1206	1205-1206	402	I/IA*AVRGGRAPX	atc/atCGCGTGAGCTGTGCGGGGCGGGCGGGCTCCTCc				1	ASIC3	VGNC		protein_coding	YES		ENSMMUP00000026926		F6W6L6.53	UPI00006D3784	6/11		Gene3D:1.10.287.770,Gene3D:2.60.470.10,Pfam:PF00858,PANTHER:PTHR11690,PANTHER:PTHR11690:SF228,TIGRFAM:TIGR00859	HIGH
ASIC3	Mmul_10	3	177053339	177053340	+	Nonsense_Mutation	INS	-	-	CGCGTGAGCTGTGCGGGGCGGGCGGGCTCCTC	novel	18113	NORMAL	-	-	ENSMMUT00000028774	6/11	32	17	15	ASIC3,stop_gained,,ENSMMUT00000028774,;CDK5,downstream_gene_variant,,ENSMMUT00000028778,;CDK5,downstream_gene_variant,,ENSMMUT00000028779,;	CGCGTGAGCTGTGCGGGGCGGGCGGGCTCCTC	ENSMMUG00000045082	ENSMMUT00000028774	Transcript	stop_gained,frameshift_variant	1205-1206	1205-1206	402	I/IA*AVRGGRAPX	atc/atCGCGTGAGCTGTGCGGGGCGGGCGGGCTCCTCc				1	ASIC3	VGNC		protein_coding	YES		ENSMMUP00000026926		F6W6L6.53	UPI00006D3784	6/11		Gene3D:1.10.287.770,Gene3D:2.60.470.10,Pfam:PF00858,PANTHER:PTHR11690,PANTHER:PTHR11690:SF228,TIGRFAM:TIGR00859	HIGH
ASIC3	Mmul_10	3	177053339	177053340	+	Nonsense_Mutation	INS	-	-	CGCGTGAGCTGTGCGGGGCGGGCGGGCTCCTC	novel	18122	NORMAL	-	-	ENSMMUT00000028774	6/11	26	14	12	ASIC3,stop_gained,,ENSMMUT00000028774,;CDK5,downstream_gene_variant,,ENSMMUT00000028778,;CDK5,downstream_gene_variant,,ENSMMUT00000028779,;	CGCGTGAGCTGTGCGGGGCGGGCGGGCTCCTC	ENSMMUG00000045082	ENSMMUT00000028774	Transcript	stop_gained,frameshift_variant	1205-1206	1205-1206	402	I/IA*AVRGGRAPX	atc/atCGCGTGAGCTGTGCGGGGCGGGCGGGCTCCTCc				1	ASIC3	VGNC		protein_coding	YES		ENSMMUP00000026926		F6W6L6.53	UPI00006D3784	6/11		Gene3D:1.10.287.770,Gene3D:2.60.470.10,Pfam:PF00858,PANTHER:PTHR11690,PANTHER:PTHR11690:SF228,TIGRFAM:TIGR00859	HIGH
ASIC3	Mmul_10	3	177053339	177053340	+	Nonsense_Mutation	INS	-	-	CGCGTGAGCTGTGCGGGGCGGGCGGGCTCCTC	novel	18167	NORMAL	-	-	ENSMMUT00000028774	6/11	23	12	11	ASIC3,stop_gained,,ENSMMUT00000028774,;CDK5,downstream_gene_variant,,ENSMMUT00000028778,;CDK5,downstream_gene_variant,,ENSMMUT00000028779,;	CGCGTGAGCTGTGCGGGGCGGGCGGGCTCCTC	ENSMMUG00000045082	ENSMMUT00000028774	Transcript	stop_gained,frameshift_variant	1205-1206	1205-1206	402	I/IA*AVRGGRAPX	atc/atCGCGTGAGCTGTGCGGGGCGGGCGGGCTCCTCc				1	ASIC3	VGNC		protein_coding	YES		ENSMMUP00000026926		F6W6L6.53	UPI00006D3784	6/11		Gene3D:1.10.287.770,Gene3D:2.60.470.10,Pfam:PF00858,PANTHER:PTHR11690,PANTHER:PTHR11690:SF228,TIGRFAM:TIGR00859	HIGH
ASIC3	Mmul_10	3	177053339	177053340	+	Nonsense_Mutation	INS	-	-	CGCGTGAGCTGTGCGGGGCGGGCGGGCTCCTC	novel	18200	NORMAL	-	-	ENSMMUT00000028774	6/11	18	6	12	ASIC3,stop_gained,,ENSMMUT00000028774,;CDK5,downstream_gene_variant,,ENSMMUT00000028778,;CDK5,downstream_gene_variant,,ENSMMUT00000028779,;	CGCGTGAGCTGTGCGGGGCGGGCGGGCTCCTC	ENSMMUG00000045082	ENSMMUT00000028774	Transcript	stop_gained,frameshift_variant	1205-1206	1205-1206	402	I/IA*AVRGGRAPX	atc/atCGCGTGAGCTGTGCGGGGCGGGCGGGCTCCTCc				1	ASIC3	VGNC		protein_coding	YES		ENSMMUP00000026926		F6W6L6.53	UPI00006D3784	6/11		Gene3D:1.10.287.770,Gene3D:2.60.470.10,Pfam:PF00858,PANTHER:PTHR11690,PANTHER:PTHR11690:SF228,TIGRFAM:TIGR00859	HIGH
ASIC3	Mmul_10	3	177053339	177053340	+	Nonsense_Mutation	INS	-	-	CGCGTGAGCTGTGCGGGGCGGGCGGGCTCCTC	novel	18205	NORMAL	-	-	ENSMMUT00000028774	6/11	14	7	7	ASIC3,stop_gained,,ENSMMUT00000028774,;CDK5,downstream_gene_variant,,ENSMMUT00000028778,;CDK5,downstream_gene_variant,,ENSMMUT00000028779,;	CGCGTGAGCTGTGCGGGGCGGGCGGGCTCCTC	ENSMMUG00000045082	ENSMMUT00000028774	Transcript	stop_gained,frameshift_variant	1205-1206	1205-1206	402	I/IA*AVRGGRAPX	atc/atCGCGTGAGCTGTGCGGGGCGGGCGGGCTCCTCc				1	ASIC3	VGNC		protein_coding	YES		ENSMMUP00000026926		F6W6L6.53	UPI00006D3784	6/11		Gene3D:1.10.287.770,Gene3D:2.60.470.10,Pfam:PF00858,PANTHER:PTHR11690,PANTHER:PTHR11690:SF228,TIGRFAM:TIGR00859	HIGH
ASIC3	Mmul_10	3	177053339	177053340	+	Nonsense_Mutation	INS	-	-	CGCGTGAGCTGTGCGGGGCGGGCGGGCTCCTC	novel	18206	NORMAL	-	-	ENSMMUT00000028774	6/11	33	13	20	ASIC3,stop_gained,,ENSMMUT00000028774,;CDK5,downstream_gene_variant,,ENSMMUT00000028778,;CDK5,downstream_gene_variant,,ENSMMUT00000028779,;	CGCGTGAGCTGTGCGGGGCGGGCGGGCTCCTC	ENSMMUG00000045082	ENSMMUT00000028774	Transcript	stop_gained,frameshift_variant	1205-1206	1205-1206	402	I/IA*AVRGGRAPX	atc/atCGCGTGAGCTGTGCGGGGCGGGCGGGCTCCTCc				1	ASIC3	VGNC		protein_coding	YES		ENSMMUP00000026926		F6W6L6.53	UPI00006D3784	6/11		Gene3D:1.10.287.770,Gene3D:2.60.470.10,Pfam:PF00858,PANTHER:PTHR11690,PANTHER:PTHR11690:SF228,TIGRFAM:TIGR00859	HIGH
ASIC3	Mmul_10	3	177053339	177053340	+	Nonsense_Mutation	INS	-	-	CGCGTGAGCTGTGCGGGGCGGGCGGGCTCCTC	novel	18216	NORMAL	-	-	ENSMMUT00000028774	6/11	32	14	18	ASIC3,stop_gained,,ENSMMUT00000028774,;CDK5,downstream_gene_variant,,ENSMMUT00000028778,;CDK5,downstream_gene_variant,,ENSMMUT00000028779,;	CGCGTGAGCTGTGCGGGGCGGGCGGGCTCCTC	ENSMMUG00000045082	ENSMMUT00000028774	Transcript	stop_gained,frameshift_variant	1205-1206	1205-1206	402	I/IA*AVRGGRAPX	atc/atCGCGTGAGCTGTGCGGGGCGGGCGGGCTCCTCc				1	ASIC3	VGNC		protein_coding	YES		ENSMMUP00000026926		F6W6L6.53	UPI00006D3784	6/11		Gene3D:1.10.287.770,Gene3D:2.60.470.10,Pfam:PF00858,PANTHER:PTHR11690,PANTHER:PTHR11690:SF228,TIGRFAM:TIGR00859	HIGH
ASIC3	Mmul_10	3	177053339	177053340	+	Nonsense_Mutation	INS	-	-	CGCGTGAGCTGTGCGGGGCGGGCGGGCTCCTC	novel	18222	NORMAL	-	-	ENSMMUT00000028774	6/11	26	8	18	ASIC3,stop_gained,,ENSMMUT00000028774,;CDK5,downstream_gene_variant,,ENSMMUT00000028778,;CDK5,downstream_gene_variant,,ENSMMUT00000028779,;	CGCGTGAGCTGTGCGGGGCGGGCGGGCTCCTC	ENSMMUG00000045082	ENSMMUT00000028774	Transcript	stop_gained,frameshift_variant	1205-1206	1205-1206	402	I/IA*AVRGGRAPX	atc/atCGCGTGAGCTGTGCGGGGCGGGCGGGCTCCTCc				1	ASIC3	VGNC		protein_coding	YES		ENSMMUP00000026926		F6W6L6.53	UPI00006D3784	6/11		Gene3D:1.10.287.770,Gene3D:2.60.470.10,Pfam:PF00858,PANTHER:PTHR11690,PANTHER:PTHR11690:SF228,TIGRFAM:TIGR00859	HIGH
ASIC3	Mmul_10	3	177053339	177053340	+	Nonsense_Mutation	INS	-	-	CGCGTGAGCTGTGCGGGGCGGGCGGGCTCCTC	novel	18241	NORMAL	-	-	ENSMMUT00000028774	6/11	47	25	22	ASIC3,stop_gained,,ENSMMUT00000028774,;CDK5,downstream_gene_variant,,ENSMMUT00000028778,;CDK5,downstream_gene_variant,,ENSMMUT00000028779,;	CGCGTGAGCTGTGCGGGGCGGGCGGGCTCCTC	ENSMMUG00000045082	ENSMMUT00000028774	Transcript	stop_gained,frameshift_variant	1205-1206	1205-1206	402	I/IA*AVRGGRAPX	atc/atCGCGTGAGCTGTGCGGGGCGGGCGGGCTCCTCc				1	ASIC3	VGNC		protein_coding	YES		ENSMMUP00000026926		F6W6L6.53	UPI00006D3784	6/11		Gene3D:1.10.287.770,Gene3D:2.60.470.10,Pfam:PF00858,PANTHER:PTHR11690,PANTHER:PTHR11690:SF228,TIGRFAM:TIGR00859	HIGH
ASIC3	Mmul_10	3	177053339	177053340	+	Nonsense_Mutation	INS	-	-	CGCGTGAGCTGTGCGGGGCGGGCGGGCTCCTC	novel	21742	NORMAL	-	-	ENSMMUT00000028774	6/11	37	11	26	ASIC3,stop_gained,,ENSMMUT00000028774,;CDK5,downstream_gene_variant,,ENSMMUT00000028778,;CDK5,downstream_gene_variant,,ENSMMUT00000028779,;	CGCGTGAGCTGTGCGGGGCGGGCGGGCTCCTC	ENSMMUG00000045082	ENSMMUT00000028774	Transcript	stop_gained,frameshift_variant	1205-1206	1205-1206	402	I/IA*AVRGGRAPX	atc/atCGCGTGAGCTGTGCGGGGCGGGCGGGCTCCTCc				1	ASIC3	VGNC		protein_coding	YES		ENSMMUP00000026926		F6W6L6.53	UPI00006D3784	6/11		Gene3D:1.10.287.770,Gene3D:2.60.470.10,Pfam:PF00858,PANTHER:PTHR11690,PANTHER:PTHR11690:SF228,TIGRFAM:TIGR00859	HIGH
ASIC3	Mmul_10	3	177053339	177053340	+	Nonsense_Mutation	INS	-	-	CGCGTGAGCTGTGCGGGGCGGGCGGGCTCCTC	novel	22256	NORMAL	-	-	ENSMMUT00000028774	6/11	36	16	20	ASIC3,stop_gained,,ENSMMUT00000028774,;CDK5,downstream_gene_variant,,ENSMMUT00000028778,;CDK5,downstream_gene_variant,,ENSMMUT00000028779,;	CGCGTGAGCTGTGCGGGGCGGGCGGGCTCCTC	ENSMMUG00000045082	ENSMMUT00000028774	Transcript	stop_gained,frameshift_variant	1205-1206	1205-1206	402	I/IA*AVRGGRAPX	atc/atCGCGTGAGCTGTGCGGGGCGGGCGGGCTCCTCc				1	ASIC3	VGNC		protein_coding	YES		ENSMMUP00000026926		F6W6L6.53	UPI00006D3784	6/11		Gene3D:1.10.287.770,Gene3D:2.60.470.10,Pfam:PF00858,PANTHER:PTHR11690,PANTHER:PTHR11690:SF228,TIGRFAM:TIGR00859	HIGH
ASIC3	Mmul_10	3	177053339	177053340	+	Nonsense_Mutation	INS	-	-	CGCGTGAGCTGTGCGGGGCGGGCGGGCTCCTC	novel	22523	NORMAL	-	-	ENSMMUT00000028774	6/11	27	15	12	ASIC3,stop_gained,,ENSMMUT00000028774,;CDK5,downstream_gene_variant,,ENSMMUT00000028778,;CDK5,downstream_gene_variant,,ENSMMUT00000028779,;	CGCGTGAGCTGTGCGGGGCGGGCGGGCTCCTC	ENSMMUG00000045082	ENSMMUT00000028774	Transcript	stop_gained,frameshift_variant	1205-1206	1205-1206	402	I/IA*AVRGGRAPX	atc/atCGCGTGAGCTGTGCGGGGCGGGCGGGCTCCTCc				1	ASIC3	VGNC		protein_coding	YES		ENSMMUP00000026926		F6W6L6.53	UPI00006D3784	6/11		Gene3D:1.10.287.770,Gene3D:2.60.470.10,Pfam:PF00858,PANTHER:PTHR11690,PANTHER:PTHR11690:SF228,TIGRFAM:TIGR00859	HIGH
ASIC3	Mmul_10	3	177053339	177053340	+	Nonsense_Mutation	INS	-	-	CGCGTGAGCTGTGCGGGGCGGGCGGGCTCCTC	novel	23001	NORMAL	-	-	ENSMMUT00000028774	6/11	28	11	17	ASIC3,stop_gained,,ENSMMUT00000028774,;CDK5,downstream_gene_variant,,ENSMMUT00000028778,;CDK5,downstream_gene_variant,,ENSMMUT00000028779,;	CGCGTGAGCTGTGCGGGGCGGGCGGGCTCCTC	ENSMMUG00000045082	ENSMMUT00000028774	Transcript	stop_gained,frameshift_variant	1205-1206	1205-1206	402	I/IA*AVRGGRAPX	atc/atCGCGTGAGCTGTGCGGGGCGGGCGGGCTCCTCc				1	ASIC3	VGNC		protein_coding	YES		ENSMMUP00000026926		F6W6L6.53	UPI00006D3784	6/11		Gene3D:1.10.287.770,Gene3D:2.60.470.10,Pfam:PF00858,PANTHER:PTHR11690,PANTHER:PTHR11690:SF228,TIGRFAM:TIGR00859	HIGH
ASIC3	Mmul_10	3	177053339	177053340	+	Nonsense_Mutation	INS	-	-	CGCGTGAGCTGTGCGGGGCGGGCGGGCTCCTC	novel	23903	NORMAL	-	-	ENSMMUT00000028774	6/11	33	16	17	ASIC3,stop_gained,,ENSMMUT00000028774,;CDK5,downstream_gene_variant,,ENSMMUT00000028778,;CDK5,downstream_gene_variant,,ENSMMUT00000028779,;	CGCGTGAGCTGTGCGGGGCGGGCGGGCTCCTC	ENSMMUG00000045082	ENSMMUT00000028774	Transcript	stop_gained,frameshift_variant	1205-1206	1205-1206	402	I/IA*AVRGGRAPX	atc/atCGCGTGAGCTGTGCGGGGCGGGCGGGCTCCTCc				1	ASIC3	VGNC		protein_coding	YES		ENSMMUP00000026926		F6W6L6.53	UPI00006D3784	6/11		Gene3D:1.10.287.770,Gene3D:2.60.470.10,Pfam:PF00858,PANTHER:PTHR11690,PANTHER:PTHR11690:SF228,TIGRFAM:TIGR00859	HIGH
ASIC3	Mmul_10	3	177053339	177053340	+	Nonsense_Mutation	INS	-	-	CGCGTGAGCTGTGCGGGGCGGGCGGGCTCCTC	novel	25891	NORMAL	-	-	ENSMMUT00000028774	6/11	34	20	14	ASIC3,stop_gained,,ENSMMUT00000028774,;CDK5,downstream_gene_variant,,ENSMMUT00000028778,;CDK5,downstream_gene_variant,,ENSMMUT00000028779,;	CGCGTGAGCTGTGCGGGGCGGGCGGGCTCCTC	ENSMMUG00000045082	ENSMMUT00000028774	Transcript	stop_gained,frameshift_variant	1205-1206	1205-1206	402	I/IA*AVRGGRAPX	atc/atCGCGTGAGCTGTGCGGGGCGGGCGGGCTCCTCc				1	ASIC3	VGNC		protein_coding	YES		ENSMMUP00000026926		F6W6L6.53	UPI00006D3784	6/11		Gene3D:1.10.287.770,Gene3D:2.60.470.10,Pfam:PF00858,PANTHER:PTHR11690,PANTHER:PTHR11690:SF228,TIGRFAM:TIGR00859	HIGH
ASIC3	Mmul_10	3	177053339	177053340	+	Nonsense_Mutation	INS	-	-	CGCGTGAGCTGTGCGGGGCGGGCGGGCTCCTC	novel	26440	NORMAL	-	-	ENSMMUT00000028774	6/11	27	13	14	ASIC3,stop_gained,,ENSMMUT00000028774,;CDK5,downstream_gene_variant,,ENSMMUT00000028778,;CDK5,downstream_gene_variant,,ENSMMUT00000028779,;	CGCGTGAGCTGTGCGGGGCGGGCGGGCTCCTC	ENSMMUG00000045082	ENSMMUT00000028774	Transcript	stop_gained,frameshift_variant	1205-1206	1205-1206	402	I/IA*AVRGGRAPX	atc/atCGCGTGAGCTGTGCGGGGCGGGCGGGCTCCTCc				1	ASIC3	VGNC		protein_coding	YES		ENSMMUP00000026926		F6W6L6.53	UPI00006D3784	6/11		Gene3D:1.10.287.770,Gene3D:2.60.470.10,Pfam:PF00858,PANTHER:PTHR11690,PANTHER:PTHR11690:SF228,TIGRFAM:TIGR00859	HIGH
ASIC3	Mmul_10	3	177053339	177053340	+	Nonsense_Mutation	INS	-	-	CGCGTGAGCTGTGCGGGGCGGGCGGGCTCCTC	novel	26537	NORMAL	-	-	ENSMMUT00000028774	6/11	15	8	7	ASIC3,stop_gained,,ENSMMUT00000028774,;CDK5,downstream_gene_variant,,ENSMMUT00000028778,;CDK5,downstream_gene_variant,,ENSMMUT00000028779,;	CGCGTGAGCTGTGCGGGGCGGGCGGGCTCCTC	ENSMMUG00000045082	ENSMMUT00000028774	Transcript	stop_gained,frameshift_variant	1205-1206	1205-1206	402	I/IA*AVRGGRAPX	atc/atCGCGTGAGCTGTGCGGGGCGGGCGGGCTCCTCc				1	ASIC3	VGNC		protein_coding	YES		ENSMMUP00000026926		F6W6L6.53	UPI00006D3784	6/11		Gene3D:1.10.287.770,Gene3D:2.60.470.10,Pfam:PF00858,PANTHER:PTHR11690,PANTHER:PTHR11690:SF228,TIGRFAM:TIGR00859	HIGH
ASIC3	Mmul_10	3	177053339	177053340	+	Nonsense_Mutation	INS	-	-	CGCGTGAGCTGTGCGGGGCGGGCGGGCTCCTC	novel	26851	NORMAL	-	-	ENSMMUT00000028774	6/11	14	8	6	ASIC3,stop_gained,,ENSMMUT00000028774,;CDK5,downstream_gene_variant,,ENSMMUT00000028778,;CDK5,downstream_gene_variant,,ENSMMUT00000028779,;	CGCGTGAGCTGTGCGGGGCGGGCGGGCTCCTC	ENSMMUG00000045082	ENSMMUT00000028774	Transcript	stop_gained,frameshift_variant	1205-1206	1205-1206	402	I/IA*AVRGGRAPX	atc/atCGCGTGAGCTGTGCGGGGCGGGCGGGCTCCTCc				1	ASIC3	VGNC		protein_coding	YES		ENSMMUP00000026926		F6W6L6.53	UPI00006D3784	6/11		Gene3D:1.10.287.770,Gene3D:2.60.470.10,Pfam:PF00858,PANTHER:PTHR11690,PANTHER:PTHR11690:SF228,TIGRFAM:TIGR00859	HIGH
ASIC3	Mmul_10	3	177053339	177053340	+	Nonsense_Mutation	INS	-	-	CGCGTGAGCTGTGCGGGGCGGGCGGGCTCCTC	novel	27151	NORMAL	-	-	ENSMMUT00000028774	6/11	24	11	13	ASIC3,stop_gained,,ENSMMUT00000028774,;CDK5,downstream_gene_variant,,ENSMMUT00000028778,;CDK5,downstream_gene_variant,,ENSMMUT00000028779,;	CGCGTGAGCTGTGCGGGGCGGGCGGGCTCCTC	ENSMMUG00000045082	ENSMMUT00000028774	Transcript	stop_gained,frameshift_variant	1205-1206	1205-1206	402	I/IA*AVRGGRAPX	atc/atCGCGTGAGCTGTGCGGGGCGGGCGGGCTCCTCc				1	ASIC3	VGNC		protein_coding	YES		ENSMMUP00000026926		F6W6L6.53	UPI00006D3784	6/11		Gene3D:1.10.287.770,Gene3D:2.60.470.10,Pfam:PF00858,PANTHER:PTHR11690,PANTHER:PTHR11690:SF228,TIGRFAM:TIGR00859	HIGH
ASIC3	Mmul_10	3	177053339	177053340	+	Nonsense_Mutation	INS	-	-	CGCGTGAGCTGTGCGGGGCGGGCGGGCTCCTC	novel	27515	NORMAL	-	-	ENSMMUT00000028774	6/11	27	11	16	ASIC3,stop_gained,,ENSMMUT00000028774,;CDK5,downstream_gene_variant,,ENSMMUT00000028778,;CDK5,downstream_gene_variant,,ENSMMUT00000028779,;	CGCGTGAGCTGTGCGGGGCGGGCGGGCTCCTC	ENSMMUG00000045082	ENSMMUT00000028774	Transcript	stop_gained,frameshift_variant	1205-1206	1205-1206	402	I/IA*AVRGGRAPX	atc/atCGCGTGAGCTGTGCGGGGCGGGCGGGCTCCTCc				1	ASIC3	VGNC		protein_coding	YES		ENSMMUP00000026926		F6W6L6.53	UPI00006D3784	6/11		Gene3D:1.10.287.770,Gene3D:2.60.470.10,Pfam:PF00858,PANTHER:PTHR11690,PANTHER:PTHR11690:SF228,TIGRFAM:TIGR00859	HIGH
ASIC3	Mmul_10	3	177053339	177053340	+	Nonsense_Mutation	INS	-	-	CGCGTGAGCTGTGCGGGGCGGGCGGGCTCCTC	novel	27516	NORMAL	-	-	ENSMMUT00000028774	6/11	19	7	12	ASIC3,stop_gained,,ENSMMUT00000028774,;CDK5,downstream_gene_variant,,ENSMMUT00000028778,;CDK5,downstream_gene_variant,,ENSMMUT00000028779,;	CGCGTGAGCTGTGCGGGGCGGGCGGGCTCCTC	ENSMMUG00000045082	ENSMMUT00000028774	Transcript	stop_gained,frameshift_variant	1205-1206	1205-1206	402	I/IA*AVRGGRAPX	atc/atCGCGTGAGCTGTGCGGGGCGGGCGGGCTCCTCc				1	ASIC3	VGNC		protein_coding	YES		ENSMMUP00000026926		F6W6L6.53	UPI00006D3784	6/11		Gene3D:1.10.287.770,Gene3D:2.60.470.10,Pfam:PF00858,PANTHER:PTHR11690,PANTHER:PTHR11690:SF228,TIGRFAM:TIGR00859	HIGH
ASIC3	Mmul_10	3	177053339	177053340	+	Nonsense_Mutation	INS	-	-	CGCGTGAGCTGTGCGGGGCGGGCGGGCTCCTC	novel	27521	NORMAL	-	-	ENSMMUT00000028774	6/11	26	14	12	ASIC3,stop_gained,,ENSMMUT00000028774,;CDK5,downstream_gene_variant,,ENSMMUT00000028778,;CDK5,downstream_gene_variant,,ENSMMUT00000028779,;	CGCGTGAGCTGTGCGGGGCGGGCGGGCTCCTC	ENSMMUG00000045082	ENSMMUT00000028774	Transcript	stop_gained,frameshift_variant	1205-1206	1205-1206	402	I/IA*AVRGGRAPX	atc/atCGCGTGAGCTGTGCGGGGCGGGCGGGCTCCTCc				1	ASIC3	VGNC		protein_coding	YES		ENSMMUP00000026926		F6W6L6.53	UPI00006D3784	6/11		Gene3D:1.10.287.770,Gene3D:2.60.470.10,Pfam:PF00858,PANTHER:PTHR11690,PANTHER:PTHR11690:SF228,TIGRFAM:TIGR00859	HIGH
ASPSCR1	Mmul_10	16	78325805	78325805	+	Missense_Mutation	SNP	G	G	A	novel	18167	NORMAL	G	G	ENSMMUT00000015243	13/16	21	13	8	ASPSCR1,missense_variant,,ENSMMUT00000015240,;ASPSCR1,missense_variant,,ENSMMUT00000015243,;ASPSCR1,missense_variant,,ENSMMUT00000057141,;ASPSCR1,missense_variant,,ENSMMUT00000076750,;ASPSCR1,missense_variant,,ENSMMUT00000104553,;ASPSCR1,3_prime_UTR_variant,,ENSMMUT00000015246,;ASPSCR1,3_prime_UTR_variant,,ENSMMUT00000093437,;ASPSCR1,3_prime_UTR_variant,,ENSMMUT00000107419,;,downstream_gene_varia…	A	ENSMMUG00000010887	ENSMMUT00000015243	Transcript	missense_variant	1564	1564	522	A/T	Gct/Act				1	ASPSCR1	VGNC		protein_coding	YES		ENSMMUP00000014285		F7FSZ5.39	UPI001235A8CE	13/16		Gene3D:3.10.20.90,Pfam:PF00789,PROSITE_profiles:PS50033,PANTHER:PTHR46467,Superfamily:SSF54236,CDD:cd16118	MODERATE
ASXL1	Mmul_10	10	67668932	67668932	+	Missense_Mutation	SNP	A	A	C	rs291871348	17943	NORMAL	A	A	ENSMMUT00000056929	12/12	22	14	8	ASXL1,missense_variant,,ENSMMUT00000009931,;ASXL1,missense_variant,,ENSMMUT00000056929,;ASXL1,missense_variant,,ENSMMUT00000075088,;	C	ENSMMUG00000007117	ENSMMUT00000056929	Transcript	missense_variant	2658	2658	886	K/N	aaA/aaC	rs291871348			1	ASXL1	VGNC		protein_coding	YES		ENSMMUP00000053692		A0A1D5R059.22	UPI0012365252	12/12		PANTHER:PTHR13578,PANTHER:PTHR13578:SF19	MODERATE
ASXL1	Mmul_10	10	67669548	67669548	+	Missense_Mutation	SNP	A	A	T	rs1081571930	18122	NORMAL	A	A	ENSMMUT00000056929	12/12	32	14	18	ASXL1,missense_variant,,ENSMMUT00000009931,;ASXL1,missense_variant,,ENSMMUT00000056929,;ASXL1,missense_variant,,ENSMMUT00000075088,;	T	ENSMMUG00000007117	ENSMMUT00000056929	Transcript	missense_variant	3274	3274	1092	M/L	Atg/Ttg	rs1081571930			1	ASXL1	VGNC		protein_coding	YES		ENSMMUP00000053692		A0A1D5R059.22	UPI0012365252	12/12		PANTHER:PTHR13578,PANTHER:PTHR13578:SF19	MODERATE
ASXL3	Mmul_10	18	48746270	48746270	+	Missense_Mutation	SNP	C	C	T	rs1078268247	23813	NORMAL	C	C	ENSMMUT00000048244	12/12	25	16	9	ASXL3,missense_variant,,ENSMMUT00000048244,;	T	ENSMMUG00000014451	ENSMMUT00000048244	Transcript	missense_variant	5545	5545	1849	V/M	Gtg/Atg	rs1078268247			-1	ASXL3	VGNC		protein_coding	YES		ENSMMUP00000041283		F7CF96.43	UPI001235C1F9	12/12		PANTHER:PTHR13578:SF18,PANTHER:PTHR13578	MODERATE
ASXL3	Mmul_10	18	48746545	48746545	+	Missense_Mutation	SNP	T	T	C	novel	18122	NORMAL	T	T	ENSMMUT00000048244	12/12	23	12	11	ASXL3,missense_variant,,ENSMMUT00000048244,;	C	ENSMMUG00000014451	ENSMMUT00000048244	Transcript	missense_variant	5270	5270	1757	N/S	aAc/aGc				-1	ASXL3	VGNC		protein_coding	YES		ENSMMUP00000041283		F7CF96.43	UPI001235C1F9	12/12		PANTHER:PTHR13578:SF18,PANTHER:PTHR13578	MODERATE
ASXL3	Mmul_10	18	48751759	48751759	+	Missense_Mutation	SNP	G	G	A	novel	26661	NORMAL	G	G	ENSMMUT00000048244	11/12	18	10	8	ASXL3,missense_variant,,ENSMMUT00000048244,;	A	ENSMMUG00000014451	ENSMMUT00000048244	Transcript	missense_variant	2726	2726	909	S/L	tCa/tTa				-1	ASXL3	VGNC		protein_coding	YES		ENSMMUP00000041283		F7CF96.43	UPI001235C1F9	11/12		MobiDB_lite:mobidb-lite,MobiDB_lite:mobidb-lite,PANTHER:PTHR13578:SF18,PANTHER:PTHR13578	MODERATE
ATIC	Mmul_10	12	102718511	102718511	+	Missense_Mutation	SNP	G	G	A	rs1082167120	18105	NORMAL	G	G	ENSMMUT00000084525	13/16	10	5	5	ATIC,missense_variant,,ENSMMUT00000017264,;ATIC,missense_variant,,ENSMMUT00000084525,;Metazoa_SRP,downstream_gene_variant,,ENSMMUT00000092750,;	A	ENSMMUG00000012318	ENSMMUT00000084525	Transcript	missense_variant	1331	1243	415	V/I	Gtc/Atc	rs1082167120			1	ATIC	VGNC		protein_coding	YES		ENSMMUP00000070071		A0A5F7ZWN5.6,G7N8U6.39	UPI000242E8CA	13/16		Gene3D:3.40.140.20,HAMAP:MF_00139,Pfam:PF01808,PIRSF:PIRSF000414,PANTHER:PTHR11692,PANTHER:PTHR11692:SF0,SMART:SM00798,Superfamily:SSF53927,TIGRFAM:TIGR00355	MODERATE
ATIC	Mmul_10	12	102718511	102718511	+	Missense_Mutation	SNP	G	G	A	rs1082167120	21742	NORMAL	G	G	ENSMMUT00000084525	13/16	25	12	13	ATIC,missense_variant,,ENSMMUT00000017264,;ATIC,missense_variant,,ENSMMUT00000084525,;Metazoa_SRP,downstream_gene_variant,,ENSMMUT00000092750,;	A	ENSMMUG00000012318	ENSMMUT00000084525	Transcript	missense_variant	1331	1243	415	V/I	Gtc/Atc	rs1082167120			1	ATIC	VGNC		protein_coding	YES		ENSMMUP00000070071		A0A5F7ZWN5.6,G7N8U6.39	UPI000242E8CA	13/16		Gene3D:3.40.140.20,HAMAP:MF_00139,Pfam:PF01808,PIRSF:PIRSF000414,PANTHER:PTHR11692,PANTHER:PTHR11692:SF0,SMART:SM00798,Superfamily:SSF53927,TIGRFAM:TIGR00355	MODERATE
ATIC	Mmul_10	12	102720628	102720628	+	Missense_Mutation	SNP	G	G	A	novel	17745	NORMAL	G	G	ENSMMUT00000084525	14/16	29	16	13	ATIC,missense_variant,,ENSMMUT00000017264,;ATIC,missense_variant,,ENSMMUT00000084525,;Metazoa_SRP,upstream_gene_variant,,ENSMMUT00000092750,;	A	ENSMMUG00000012318	ENSMMUT00000084525	Transcript	missense_variant	1562	1474	492	D/N	Gat/Aat				1	ATIC	VGNC		protein_coding	YES		ENSMMUP00000070071		A0A5F7ZWN5.6,G7N8U6.39	UPI000242E8CA	14/16		Gene3D:1.10.287.440,Gene3D:3.40.140.20,HAMAP:MF_00139,PIRSF:PIRSF000414,PANTHER:PTHR11692,PANTHER:PTHR11692:SF0,Superfamily:SSF53927,TIGRFAM:TIGR00355	MODERATE
ATIC	Mmul_10	12	102723310	102723310	+	Missense_Mutation	SNP	G	G	A	rs293229980	17943	NORMAL	G	G	ENSMMUT00000084525	16/16	31	15	16	ATIC,missense_variant,,ENSMMUT00000017264,;ATIC,missense_variant,,ENSMMUT00000084525,;Metazoa_SRP,upstream_gene_variant,,ENSMMUT00000092750,;	A	ENSMMUG00000012318	ENSMMUT00000084525	Transcript	missense_variant	1796	1708	570	V/I	Gtt/Att	rs293229980			1	ATIC	VGNC		protein_coding	YES		ENSMMUP00000070071		A0A5F7ZWN5.6,G7N8U6.39	UPI000242E8CA	16/16		Gene3D:3.40.140.20,HAMAP:MF_00139,PIRSF:PIRSF000414,PANTHER:PTHR11692,PANTHER:PTHR11692:SF0,Superfamily:SSF53927	MODERATE
ATIC	Mmul_10	12	102723310	102723310	+	Missense_Mutation	SNP	G	G	A	rs293229980	18087	NORMAL	G	G	ENSMMUT00000084525	16/16	37	14	23	ATIC,missense_variant,,ENSMMUT00000017264,;ATIC,missense_variant,,ENSMMUT00000084525,;Metazoa_SRP,upstream_gene_variant,,ENSMMUT00000092750,;	A	ENSMMUG00000012318	ENSMMUT00000084525	Transcript	missense_variant	1796	1708	570	V/I	Gtt/Att	rs293229980			1	ATIC	VGNC		protein_coding	YES		ENSMMUP00000070071		A0A5F7ZWN5.6,G7N8U6.39	UPI000242E8CA	16/16		Gene3D:3.40.140.20,HAMAP:MF_00139,PIRSF:PIRSF000414,PANTHER:PTHR11692,PANTHER:PTHR11692:SF0,Superfamily:SSF53927	MODERATE
ATM	Mmul_10	14	101576389	101576389	+	Missense_Mutation	SNP	C	C	G	rs1074835789	17979	NORMAL	C	C	ENSMMUT00000005904	52/62	35	17	18	ATM,missense_variant,,ENSMMUT00000005904,;ATM,missense_variant,,ENSMMUT00000043730,;ATM,missense_variant,,ENSMMUT00000089520,;ATM,missense_variant,,ENSMMUT00000095601,;ATM,missense_variant,,ENSMMUT00000100720,;ATM,missense_variant,,ENSMMUT00000101025,;ATM,missense_variant,,ENSMMUT00000109536,;NPAT,intron_variant,,ENSMMUT00000043736,;	G	ENSMMUG00000004153	ENSMMUT00000005904	Transcript	missense_variant	7933	7907	2636	T/S	aCt/aGt	rs1074835789			1	ATM	VGNC		protein_coding	YES		ENSMMUP00000005561		F6XCB4.77	UPI0010A23212	52/62		PANTHER:PTHR11139:SF72,PANTHER:PTHR11139,Superfamily:SSF56112	MODERATE
ATP1A1	Mmul_10	1	107868906	107868906	+	Missense_Mutation	SNP	G	G	A	novel	30186	NORMAL	G	G	ENSMMUT00000054218	9/23	37	16	21	ATP1A1,missense_variant,,ENSMMUT00000011389,;ATP1A1,missense_variant,,ENSMMUT00000045558,;ATP1A1,missense_variant,,ENSMMUT00000054218,;	A	ENSMMUG00000008151	ENSMMUT00000054218	Transcript	missense_variant	1136	1136	379	S/L	tCg/tTg				-1	ATP1A1	VGNC		protein_coding	YES		ENSMMUP00000051806		A0A1D5QUS6.25	UPI00085B6057	9/23		Gene3D:1.20.1110.10,Gene3D:3.40.50.1000,Prints:PR00119,Prints:PR00121,PANTHER:PTHR43294,PANTHER:PTHR43294:SF9,SFLD:SFLDF00027,SFLD:SFLDG00002,Superfamily:SSF56784,Superfamily:SSF81665,TIGRFAM:TIGR01106,TIGRFAM:TIGR01494,CDD:cd02608	MODERATE
ATP2B3	Mmul_10	X	149528842	149528842	+	Missense_Mutation	SNP	G	G	T	novel	17874	NORMAL	G	G	ENSMMUT00000016072	11/21	32	15	17	ATP2B3,missense_variant,,ENSMMUT00000016072,;ATP2B3,missense_variant,,ENSMMUT00000016073,;ATP2B3,missense_variant,,ENSMMUT00000029697,;	T	ENSMMUG00000011478	ENSMMUT00000016072	Transcript	missense_variant	2278	1763	588	R/L	cGc/cTc				1	ATP2B3	VGNC		protein_coding	YES		ENSMMUP00000015063		F7ADY0.69	UPI0010A21734	11/21		SFLD:SFLDG00002,SFLD:SFLDF00027,CDD:cd02081,Pfam:PF13246,Gene3D:3.40.50.1000,Gene3D:1.20.1110.10,TIGRFAM:TIGR01517,Gene3D:3.40.1110.10,Superfamily:SSF56784,Superfamily:SSF81660,Superfamily:SSF81665,PANTHER:PTHR24093,PANTHER:PTHR24093:SF284	MODERATE
ATP2B3	Mmul_10	X	149528842	149528842	+	Missense_Mutation	SNP	G	G	T	novel	18022	NORMAL	G	G	ENSMMUT00000016072	11/21	43	19	24	ATP2B3,missense_variant,,ENSMMUT00000016072,;ATP2B3,missense_variant,,ENSMMUT00000016073,;ATP2B3,missense_variant,,ENSMMUT00000029697,;	T	ENSMMUG00000011478	ENSMMUT00000016072	Transcript	missense_variant	2278	1763	588	R/L	cGc/cTc				1	ATP2B3	VGNC		protein_coding	YES		ENSMMUP00000015063		F7ADY0.69	UPI0010A21734	11/21		SFLD:SFLDG00002,SFLD:SFLDF00027,CDD:cd02081,Pfam:PF13246,Gene3D:3.40.50.1000,Gene3D:1.20.1110.10,TIGRFAM:TIGR01517,Gene3D:3.40.1110.10,Superfamily:SSF56784,Superfamily:SSF81660,Superfamily:SSF81665,PANTHER:PTHR24093,PANTHER:PTHR24093:SF284	MODERATE
ATP2B3	Mmul_10	X	149528842	149528842	+	Missense_Mutation	SNP	G	G	T	novel	26661	NORMAL	G	G	ENSMMUT00000016072	11/21	37	18	19	ATP2B3,missense_variant,,ENSMMUT00000016072,;ATP2B3,missense_variant,,ENSMMUT00000016073,;ATP2B3,missense_variant,,ENSMMUT00000029697,;	T	ENSMMUG00000011478	ENSMMUT00000016072	Transcript	missense_variant	2278	1763	588	R/L	cGc/cTc				1	ATP2B3	VGNC		protein_coding	YES		ENSMMUP00000015063		F7ADY0.69	UPI0010A21734	11/21		SFLD:SFLDG00002,SFLD:SFLDF00027,CDD:cd02081,Pfam:PF13246,Gene3D:3.40.50.1000,Gene3D:1.20.1110.10,TIGRFAM:TIGR01517,Gene3D:3.40.1110.10,Superfamily:SSF56784,Superfamily:SSF81660,Superfamily:SSF81665,PANTHER:PTHR24093,PANTHER:PTHR24093:SF284	MODERATE
ATP2B3	Mmul_10	X	149541560	149541560	+	Missense_Mutation	SNP	C	C	T	novel	27151	NORMAL	C	C	ENSMMUT00000016072	19/21	34	16	18	ATP2B3,missense_variant,,ENSMMUT00000016072,;ATP2B3,missense_variant,,ENSMMUT00000016073,;ATP2B3,missense_variant,,ENSMMUT00000029697,;	T	ENSMMUG00000011478	ENSMMUT00000016072	Transcript	missense_variant	3619	3104	1035	T/M	aCg/aTg				1	ATP2B3	VGNC		protein_coding	YES		ENSMMUP00000015063		F7ADY0.69	UPI0010A21734	19/21		Gene3D:1.20.1110.10,Pfam:PF00689,TIGRFAM:TIGR01517,Superfamily:SSF81665,PANTHER:PTHR24093,PANTHER:PTHR24093:SF284	MODERATE
ATP7B	Mmul_10	17	30397858	30397858	+	Missense_Mutation	SNP	G	G	C	novel	27151	NORMAL	G	G	ENSMMUT00000068925	16/21	17	10	7	ATP7B,missense_variant,,ENSMMUT00000018059,;ATP7B,missense_variant,,ENSMMUT00000068925,;	C	ENSMMUG00000016520	ENSMMUT00000068925	Transcript	missense_variant	3632	3632	1211	S/C	tCt/tGt				-1	ATP7B	VGNC		protein_coding	YES		ENSMMUP00000056345		A0A1D5R7Q5.25	UPI0010A23E39	16/21		Gene3D:3.40.1110.10,Pfam:PF00702,PANTHER:PTHR43520,PANTHER:PTHR43520:SF9,SFLD:SFLDF00027,SFLD:SFLDS00003,Superfamily:SSF56784,TIGRFAM:TIGR01525,CDD:cd02094	MODERATE
ATP7B	Mmul_10	17	30399039	30399039	+	Missense_Mutation	SNP	T	C	C	rs1076095393	25329	NORMAL	T	T	ENSMMUT00000068925	15/21	25	2	23	ATP7B,missense_variant,,ENSMMUT00000018059,;ATP7B,missense_variant,,ENSMMUT00000068925,;	C	ENSMMUG00000016520	ENSMMUT00000068925	Transcript	missense_variant	3601	3601	1201	T/A	Aca/Gca	rs1076095393			-1	ATP7B	VGNC		protein_coding	YES		ENSMMUP00000056345		A0A1D5R7Q5.25	UPI0010A23E39	15/21		Gene3D:3.40.1110.10,Pfam:PF00702,PANTHER:PTHR43520,PANTHER:PTHR43520:SF9,SFLD:SFLDF00027,SFLD:SFLDS00003,Superfamily:SSF56784,TIGRFAM:TIGR01525,CDD:cd02094	MODERATE
ATP7B	Mmul_10	17	30399039	30399039	+	Missense_Mutation	SNP	T	T	C	rs1076095393	17944	NORMAL	T	T	ENSMMUT00000068925	15/21	30	12	18	ATP7B,missense_variant,,ENSMMUT00000018059,;ATP7B,missense_variant,,ENSMMUT00000068925,;	C	ENSMMUG00000016520	ENSMMUT00000068925	Transcript	missense_variant	3601	3601	1201	T/A	Aca/Gca	rs1076095393			-1	ATP7B	VGNC		protein_coding	YES		ENSMMUP00000056345		A0A1D5R7Q5.25	UPI0010A23E39	15/21		Gene3D:3.40.1110.10,Pfam:PF00702,PANTHER:PTHR43520,PANTHER:PTHR43520:SF9,SFLD:SFLDF00027,SFLD:SFLDS00003,Superfamily:SSF56784,TIGRFAM:TIGR01525,CDD:cd02094	MODERATE
ATP7B	Mmul_10	17	30399039	30399039	+	Missense_Mutation	SNP	T	T	C	rs1076095393	18095	NORMAL	T	T	ENSMMUT00000068925	15/21	34	18	16	ATP7B,missense_variant,,ENSMMUT00000018059,;ATP7B,missense_variant,,ENSMMUT00000068925,;	C	ENSMMUG00000016520	ENSMMUT00000068925	Transcript	missense_variant	3601	3601	1201	T/A	Aca/Gca	rs1076095393			-1	ATP7B	VGNC		protein_coding	YES		ENSMMUP00000056345		A0A1D5R7Q5.25	UPI0010A23E39	15/21		Gene3D:3.40.1110.10,Pfam:PF00702,PANTHER:PTHR43520,PANTHER:PTHR43520:SF9,SFLD:SFLDF00027,SFLD:SFLDS00003,Superfamily:SSF56784,TIGRFAM:TIGR01525,CDD:cd02094	MODERATE
ATP7B	Mmul_10	17	30399039	30399039	+	Missense_Mutation	SNP	T	T	C	rs1076095393	18098	NORMAL	T	T	ENSMMUT00000068925	15/21	36	13	23	ATP7B,missense_variant,,ENSMMUT00000018059,;ATP7B,missense_variant,,ENSMMUT00000068925,;	C	ENSMMUG00000016520	ENSMMUT00000068925	Transcript	missense_variant	3601	3601	1201	T/A	Aca/Gca	rs1076095393			-1	ATP7B	VGNC		protein_coding	YES		ENSMMUP00000056345		A0A1D5R7Q5.25	UPI0010A23E39	15/21		Gene3D:3.40.1110.10,Pfam:PF00702,PANTHER:PTHR43520,PANTHER:PTHR43520:SF9,SFLD:SFLDF00027,SFLD:SFLDS00003,Superfamily:SSF56784,TIGRFAM:TIGR01525,CDD:cd02094	MODERATE
ATP7B	Mmul_10	17	30399039	30399039	+	Missense_Mutation	SNP	T	T	C	rs1076095393	18110	NORMAL	T	T	ENSMMUT00000068925	15/21	35	16	19	ATP7B,missense_variant,,ENSMMUT00000018059,;ATP7B,missense_variant,,ENSMMUT00000068925,;	C	ENSMMUG00000016520	ENSMMUT00000068925	Transcript	missense_variant	3601	3601	1201	T/A	Aca/Gca	rs1076095393			-1	ATP7B	VGNC		protein_coding	YES		ENSMMUP00000056345		A0A1D5R7Q5.25	UPI0010A23E39	15/21		Gene3D:3.40.1110.10,Pfam:PF00702,PANTHER:PTHR43520,PANTHER:PTHR43520:SF9,SFLD:SFLDF00027,SFLD:SFLDS00003,Superfamily:SSF56784,TIGRFAM:TIGR01525,CDD:cd02094	MODERATE
ATP7B	Mmul_10	17	30399039	30399039	+	Missense_Mutation	SNP	T	T	C	rs1076095393	18111	NORMAL	T	T	ENSMMUT00000068925	15/21	32	19	13	ATP7B,missense_variant,,ENSMMUT00000018059,;ATP7B,missense_variant,,ENSMMUT00000068925,;	C	ENSMMUG00000016520	ENSMMUT00000068925	Transcript	missense_variant	3601	3601	1201	T/A	Aca/Gca	rs1076095393			-1	ATP7B	VGNC		protein_coding	YES		ENSMMUP00000056345		A0A1D5R7Q5.25	UPI0010A23E39	15/21		Gene3D:3.40.1110.10,Pfam:PF00702,PANTHER:PTHR43520,PANTHER:PTHR43520:SF9,SFLD:SFLDF00027,SFLD:SFLDS00003,Superfamily:SSF56784,TIGRFAM:TIGR01525,CDD:cd02094	MODERATE
ATP7B	Mmul_10	17	30399039	30399039	+	Missense_Mutation	SNP	T	T	C	rs1076095393	18113	NORMAL	T	T	ENSMMUT00000068925	15/21	34	21	13	ATP7B,missense_variant,,ENSMMUT00000018059,;ATP7B,missense_variant,,ENSMMUT00000068925,;	C	ENSMMUG00000016520	ENSMMUT00000068925	Transcript	missense_variant	3601	3601	1201	T/A	Aca/Gca	rs1076095393			-1	ATP7B	VGNC		protein_coding	YES		ENSMMUP00000056345		A0A1D5R7Q5.25	UPI0010A23E39	15/21		Gene3D:3.40.1110.10,Pfam:PF00702,PANTHER:PTHR43520,PANTHER:PTHR43520:SF9,SFLD:SFLDF00027,SFLD:SFLDS00003,Superfamily:SSF56784,TIGRFAM:TIGR01525,CDD:cd02094	MODERATE
ATP7B	Mmul_10	17	30399039	30399039	+	Missense_Mutation	SNP	T	T	C	rs1076095393	18201	NORMAL	T	T	ENSMMUT00000068925	15/21	27	15	12	ATP7B,missense_variant,,ENSMMUT00000018059,;ATP7B,missense_variant,,ENSMMUT00000068925,;	C	ENSMMUG00000016520	ENSMMUT00000068925	Transcript	missense_variant	3601	3601	1201	T/A	Aca/Gca	rs1076095393			-1	ATP7B	VGNC		protein_coding	YES		ENSMMUP00000056345		A0A1D5R7Q5.25	UPI0010A23E39	15/21		Gene3D:3.40.1110.10,Pfam:PF00702,PANTHER:PTHR43520,PANTHER:PTHR43520:SF9,SFLD:SFLDF00027,SFLD:SFLDS00003,Superfamily:SSF56784,TIGRFAM:TIGR01525,CDD:cd02094	MODERATE
ATP7B	Mmul_10	17	30399039	30399039	+	Missense_Mutation	SNP	T	T	C	rs1076095393	18205	NORMAL	T	T	ENSMMUT00000068925	15/21	20	8	12	ATP7B,missense_variant,,ENSMMUT00000018059,;ATP7B,missense_variant,,ENSMMUT00000068925,;	C	ENSMMUG00000016520	ENSMMUT00000068925	Transcript	missense_variant	3601	3601	1201	T/A	Aca/Gca	rs1076095393			-1	ATP7B	VGNC		protein_coding	YES		ENSMMUP00000056345		A0A1D5R7Q5.25	UPI0010A23E39	15/21		Gene3D:3.40.1110.10,Pfam:PF00702,PANTHER:PTHR43520,PANTHER:PTHR43520:SF9,SFLD:SFLDF00027,SFLD:SFLDS00003,Superfamily:SSF56784,TIGRFAM:TIGR01525,CDD:cd02094	MODERATE
ATP7B	Mmul_10	17	30399039	30399039	+	Missense_Mutation	SNP	T	T	C	rs1076095393	18210	NORMAL	T	T	ENSMMUT00000068925	15/21	29	10	19	ATP7B,missense_variant,,ENSMMUT00000018059,;ATP7B,missense_variant,,ENSMMUT00000068925,;	C	ENSMMUG00000016520	ENSMMUT00000068925	Transcript	missense_variant	3601	3601	1201	T/A	Aca/Gca	rs1076095393			-1	ATP7B	VGNC		protein_coding	YES		ENSMMUP00000056345		A0A1D5R7Q5.25	UPI0010A23E39	15/21		Gene3D:3.40.1110.10,Pfam:PF00702,PANTHER:PTHR43520,PANTHER:PTHR43520:SF9,SFLD:SFLDF00027,SFLD:SFLDS00003,Superfamily:SSF56784,TIGRFAM:TIGR01525,CDD:cd02094	MODERATE
ATP7B	Mmul_10	17	30399039	30399039	+	Missense_Mutation	SNP	T	T	C	rs1076095393	18216	NORMAL	T	T	ENSMMUT00000068925	15/21	33	8	25	ATP7B,missense_variant,,ENSMMUT00000018059,;ATP7B,missense_variant,,ENSMMUT00000068925,;	C	ENSMMUG00000016520	ENSMMUT00000068925	Transcript	missense_variant	3601	3601	1201	T/A	Aca/Gca	rs1076095393			-1	ATP7B	VGNC		protein_coding	YES		ENSMMUP00000056345		A0A1D5R7Q5.25	UPI0010A23E39	15/21		Gene3D:3.40.1110.10,Pfam:PF00702,PANTHER:PTHR43520,PANTHER:PTHR43520:SF9,SFLD:SFLDF00027,SFLD:SFLDS00003,Superfamily:SSF56784,TIGRFAM:TIGR01525,CDD:cd02094	MODERATE
ATP7B	Mmul_10	17	30399039	30399039	+	Missense_Mutation	SNP	T	T	C	rs1076095393	18222	NORMAL	T	T	ENSMMUT00000068925	15/21	26	13	13	ATP7B,missense_variant,,ENSMMUT00000018059,;ATP7B,missense_variant,,ENSMMUT00000068925,;	C	ENSMMUG00000016520	ENSMMUT00000068925	Transcript	missense_variant	3601	3601	1201	T/A	Aca/Gca	rs1076095393			-1	ATP7B	VGNC		protein_coding	YES		ENSMMUP00000056345		A0A1D5R7Q5.25	UPI0010A23E39	15/21		Gene3D:3.40.1110.10,Pfam:PF00702,PANTHER:PTHR43520,PANTHER:PTHR43520:SF9,SFLD:SFLDF00027,SFLD:SFLDS00003,Superfamily:SSF56784,TIGRFAM:TIGR01525,CDD:cd02094	MODERATE
ATP7B	Mmul_10	17	30399039	30399039	+	Missense_Mutation	SNP	T	T	C	rs1076095393	23665	NORMAL	T	T	ENSMMUT00000068925	15/21	25	9	16	ATP7B,missense_variant,,ENSMMUT00000018059,;ATP7B,missense_variant,,ENSMMUT00000068925,;	C	ENSMMUG00000016520	ENSMMUT00000068925	Transcript	missense_variant	3601	3601	1201	T/A	Aca/Gca	rs1076095393			-1	ATP7B	VGNC		protein_coding	YES		ENSMMUP00000056345		A0A1D5R7Q5.25	UPI0010A23E39	15/21		Gene3D:3.40.1110.10,Pfam:PF00702,PANTHER:PTHR43520,PANTHER:PTHR43520:SF9,SFLD:SFLDF00027,SFLD:SFLDS00003,Superfamily:SSF56784,TIGRFAM:TIGR01525,CDD:cd02094	MODERATE
ATP7B	Mmul_10	17	30399039	30399039	+	Missense_Mutation	SNP	T	T	C	rs1076095393	23903	NORMAL	T	T	ENSMMUT00000068925	15/21	20	9	11	ATP7B,missense_variant,,ENSMMUT00000018059,;ATP7B,missense_variant,,ENSMMUT00000068925,;	C	ENSMMUG00000016520	ENSMMUT00000068925	Transcript	missense_variant	3601	3601	1201	T/A	Aca/Gca	rs1076095393			-1	ATP7B	VGNC		protein_coding	YES		ENSMMUP00000056345		A0A1D5R7Q5.25	UPI0010A23E39	15/21		Gene3D:3.40.1110.10,Pfam:PF00702,PANTHER:PTHR43520,PANTHER:PTHR43520:SF9,SFLD:SFLDF00027,SFLD:SFLDS00003,Superfamily:SSF56784,TIGRFAM:TIGR01525,CDD:cd02094	MODERATE
ATP7B	Mmul_10	17	30399039	30399039	+	Missense_Mutation	SNP	T	T	C	rs1076095393	25856	NORMAL	T	T	ENSMMUT00000068925	15/21	35	17	18	ATP7B,missense_variant,,ENSMMUT00000018059,;ATP7B,missense_variant,,ENSMMUT00000068925,;	C	ENSMMUG00000016520	ENSMMUT00000068925	Transcript	missense_variant	3601	3601	1201	T/A	Aca/Gca	rs1076095393			-1	ATP7B	VGNC		protein_coding	YES		ENSMMUP00000056345		A0A1D5R7Q5.25	UPI0010A23E39	15/21		Gene3D:3.40.1110.10,Pfam:PF00702,PANTHER:PTHR43520,PANTHER:PTHR43520:SF9,SFLD:SFLDF00027,SFLD:SFLDS00003,Superfamily:SSF56784,TIGRFAM:TIGR01525,CDD:cd02094	MODERATE
ATP7B	Mmul_10	17	30450729	30450729	+	Missense_Mutation	SNP	T	T	C	novel	17943	NORMAL	T	T	ENSMMUT00000068925	1/21	37	16	21	ATP7B,missense_variant,,ENSMMUT00000068925,;ATP7B,intron_variant,,ENSMMUT00000018059,;	C	ENSMMUG00000016520	ENSMMUT00000068925	Transcript	missense_variant	238	238	80	S/G	Agt/Ggt				-1	ATP7B	VGNC		protein_coding	YES		ENSMMUP00000056345		A0A1D5R7Q5.25	UPI0010A23E39	1/21			MODERATE
ATR	Mmul_10	2	44612612	44612612	+	Missense_Mutation	SNP	C	C	T	novel	17573	NORMAL	C	C	ENSMMUT00000011100	35/47	30	20	10	ATR,missense_variant,,ENSMMUT00000011100,;ATR,missense_variant,,ENSMMUT00000094893,;ATR,missense_variant,,ENSMMUT00000104898,;	T	ENSMMUG00000007927	ENSMMUT00000011100	Transcript	missense_variant	6004	6004	2002	A/T	Gct/Act				-1	ATR	VGNC		protein_coding	YES		ENSMMUP00000010409		F7HT00.64	UPI0010A29FAC	35/47		Gene3D:1.25.40.10,Pfam:PF02259,PROSITE_profiles:PS51189,PANTHER:PTHR11139,PANTHER:PTHR11139:SF69	MODERATE
ATR	Mmul_10	2	44655001	44655001	+	Missense_Mutation	SNP	T	T	A	rs307512346	18167	NORMAL	T	T	ENSMMUT00000011100	19/47	29	13	16	ATR,missense_variant,,ENSMMUT00000011100,;ATR,missense_variant,,ENSMMUT00000094893,;ATR,missense_variant,,ENSMMUT00000104898,;	A	ENSMMUG00000007927	ENSMMUT00000011100	Transcript	missense_variant	3614	3614	1205	H/L	cAt/cTt	rs307512346			-1	ATR	VGNC		protein_coding	YES		ENSMMUP00000010409		F7HT00.64	UPI0010A29FAC	19/47		Pfam:PF08064,PANTHER:PTHR11139,PANTHER:PTHR11139:SF69,SMART:SM00802,Superfamily:SSF48371	MODERATE
AUTS2	Mmul_10	3	50070492	50070492	+	Missense_Mutation	SNP	G	G	C	novel	17857	NORMAL	G	G	ENSMMUT00000024846	2/18	28	12	16	AUTS2,missense_variant,,ENSMMUT00000024846,;	C	ENSMMUG00000017675	ENSMMUT00000024846	Transcript	missense_variant	419	419	140	S/T	aGc/aCc				1	AUTS2	VGNC		protein_coding	YES		ENSMMUP00000023254		F6UAV9.45	UPI001236C55A	2/18		PANTHER:PTHR14429,PANTHER:PTHR14429:SF5,MobiDB_lite:mobidb-lite	MODERATE
AUTS2	Mmul_10	3	50932989	50932989	+	Missense_Mutation	SNP	C	C	A	rs283147243	17745	NORMAL	C	C	ENSMMUT00000024846	6/18	30	19	11	AUTS2,missense_variant,,ENSMMUT00000024846,;	A	ENSMMUG00000017675	ENSMMUT00000024846	Transcript	missense_variant	829	829	277	P/T	Ccg/Acg	rs283147243			1	AUTS2	VGNC		protein_coding	YES		ENSMMUP00000023254		F6UAV9.45	UPI001236C55A	6/18		PANTHER:PTHR14429,PANTHER:PTHR14429:SF5,MobiDB_lite:mobidb-lite,MobiDB_lite:mobidb-lite,Low_complexity_(Seg):seg	MODERATE
AUTS2	Mmul_10	3	50932989	50932989	+	Missense_Mutation	SNP	C	C	A	rs283147243	17857	NORMAL	C	C	ENSMMUT00000024846	6/18	33	18	15	AUTS2,missense_variant,,ENSMMUT00000024846,;	A	ENSMMUG00000017675	ENSMMUT00000024846	Transcript	missense_variant	829	829	277	P/T	Ccg/Acg	rs283147243			1	AUTS2	VGNC		protein_coding	YES		ENSMMUP00000023254		F6UAV9.45	UPI001236C55A	6/18		PANTHER:PTHR14429,PANTHER:PTHR14429:SF5,MobiDB_lite:mobidb-lite,MobiDB_lite:mobidb-lite,Low_complexity_(Seg):seg	MODERATE
AUTS2	Mmul_10	3	50932989	50932989	+	Missense_Mutation	SNP	C	C	A	rs283147243	17968	NORMAL	C	C	ENSMMUT00000024846	6/18	33	21	12	AUTS2,missense_variant,,ENSMMUT00000024846,;	A	ENSMMUG00000017675	ENSMMUT00000024846	Transcript	missense_variant	829	829	277	P/T	Ccg/Acg	rs283147243			1	AUTS2	VGNC		protein_coding	YES		ENSMMUP00000023254		F6UAV9.45	UPI001236C55A	6/18		PANTHER:PTHR14429,PANTHER:PTHR14429:SF5,MobiDB_lite:mobidb-lite,MobiDB_lite:mobidb-lite,Low_complexity_(Seg):seg	MODERATE
AUTS2	Mmul_10	3	50932989	50932989	+	Missense_Mutation	SNP	C	C	A	rs283147243	18008	NORMAL	C	C	ENSMMUT00000024846	6/18	26	11	15	AUTS2,missense_variant,,ENSMMUT00000024846,;	A	ENSMMUG00000017675	ENSMMUT00000024846	Transcript	missense_variant	829	829	277	P/T	Ccg/Acg	rs283147243			1	AUTS2	VGNC		protein_coding	YES		ENSMMUP00000023254		F6UAV9.45	UPI001236C55A	6/18		PANTHER:PTHR14429,PANTHER:PTHR14429:SF5,MobiDB_lite:mobidb-lite,MobiDB_lite:mobidb-lite,Low_complexity_(Seg):seg	MODERATE
AUTS2	Mmul_10	3	50932989	50932989	+	Missense_Mutation	SNP	C	C	A	rs283147243	18022	NORMAL	C	C	ENSMMUT00000024846	6/18	34	16	18	AUTS2,missense_variant,,ENSMMUT00000024846,;	A	ENSMMUG00000017675	ENSMMUT00000024846	Transcript	missense_variant	829	829	277	P/T	Ccg/Acg	rs283147243			1	AUTS2	VGNC		protein_coding	YES		ENSMMUP00000023254		F6UAV9.45	UPI001236C55A	6/18		PANTHER:PTHR14429,PANTHER:PTHR14429:SF5,MobiDB_lite:mobidb-lite,MobiDB_lite:mobidb-lite,Low_complexity_(Seg):seg	MODERATE
AUTS2	Mmul_10	3	50932989	50932989	+	Missense_Mutation	SNP	C	C	A	rs283147243	18087	NORMAL	C	C	ENSMMUT00000024846	6/18	44	22	22	AUTS2,missense_variant,,ENSMMUT00000024846,;	A	ENSMMUG00000017675	ENSMMUT00000024846	Transcript	missense_variant	829	829	277	P/T	Ccg/Acg	rs283147243			1	AUTS2	VGNC		protein_coding	YES		ENSMMUP00000023254		F6UAV9.45	UPI001236C55A	6/18		PANTHER:PTHR14429,PANTHER:PTHR14429:SF5,MobiDB_lite:mobidb-lite,MobiDB_lite:mobidb-lite,Low_complexity_(Seg):seg	MODERATE
AUTS2	Mmul_10	3	50932989	50932989	+	Missense_Mutation	SNP	C	C	A	rs283147243	18090	NORMAL	C	C	ENSMMUT00000024846	6/18	36	19	17	AUTS2,missense_variant,,ENSMMUT00000024846,;	A	ENSMMUG00000017675	ENSMMUT00000024846	Transcript	missense_variant	829	829	277	P/T	Ccg/Acg	rs283147243			1	AUTS2	VGNC		protein_coding	YES		ENSMMUP00000023254		F6UAV9.45	UPI001236C55A	6/18		PANTHER:PTHR14429,PANTHER:PTHR14429:SF5,MobiDB_lite:mobidb-lite,MobiDB_lite:mobidb-lite,Low_complexity_(Seg):seg	MODERATE
AUTS2	Mmul_10	3	50932989	50932989	+	Missense_Mutation	SNP	C	C	A	rs283147243	18095	NORMAL	C	C	ENSMMUT00000024846	6/18	28	17	11	AUTS2,missense_variant,,ENSMMUT00000024846,;	A	ENSMMUG00000017675	ENSMMUT00000024846	Transcript	missense_variant	829	829	277	P/T	Ccg/Acg	rs283147243			1	AUTS2	VGNC		protein_coding	YES		ENSMMUP00000023254		F6UAV9.45	UPI001236C55A	6/18		PANTHER:PTHR14429,PANTHER:PTHR14429:SF5,MobiDB_lite:mobidb-lite,MobiDB_lite:mobidb-lite,Low_complexity_(Seg):seg	MODERATE
AUTS2	Mmul_10	3	50932989	50932989	+	Missense_Mutation	SNP	C	C	A	rs283147243	18098	NORMAL	C	C	ENSMMUT00000024846	6/18	31	15	16	AUTS2,missense_variant,,ENSMMUT00000024846,;	A	ENSMMUG00000017675	ENSMMUT00000024846	Transcript	missense_variant	829	829	277	P/T	Ccg/Acg	rs283147243			1	AUTS2	VGNC		protein_coding	YES		ENSMMUP00000023254		F6UAV9.45	UPI001236C55A	6/18		PANTHER:PTHR14429,PANTHER:PTHR14429:SF5,MobiDB_lite:mobidb-lite,MobiDB_lite:mobidb-lite,Low_complexity_(Seg):seg	MODERATE
AUTS2	Mmul_10	3	50932989	50932989	+	Missense_Mutation	SNP	C	C	A	rs283147243	18100	NORMAL	C	C	ENSMMUT00000024846	6/18	29	9	20	AUTS2,missense_variant,,ENSMMUT00000024846,;	A	ENSMMUG00000017675	ENSMMUT00000024846	Transcript	missense_variant	829	829	277	P/T	Ccg/Acg	rs283147243			1	AUTS2	VGNC		protein_coding	YES		ENSMMUP00000023254		F6UAV9.45	UPI001236C55A	6/18		PANTHER:PTHR14429,PANTHER:PTHR14429:SF5,MobiDB_lite:mobidb-lite,MobiDB_lite:mobidb-lite,Low_complexity_(Seg):seg	MODERATE
AUTS2	Mmul_10	3	50932989	50932989	+	Missense_Mutation	SNP	C	C	A	rs283147243	18105	NORMAL	C	C	ENSMMUT00000024846	6/18	6	3	3	AUTS2,missense_variant,,ENSMMUT00000024846,;	A	ENSMMUG00000017675	ENSMMUT00000024846	Transcript	missense_variant	829	829	277	P/T	Ccg/Acg	rs283147243			1	AUTS2	VGNC		protein_coding	YES		ENSMMUP00000023254		F6UAV9.45	UPI001236C55A	6/18		PANTHER:PTHR14429,PANTHER:PTHR14429:SF5,MobiDB_lite:mobidb-lite,MobiDB_lite:mobidb-lite,Low_complexity_(Seg):seg	MODERATE
AUTS2	Mmul_10	3	50932989	50932989	+	Missense_Mutation	SNP	C	C	A	rs283147243	18110	NORMAL	C	C	ENSMMUT00000024846	6/18	23	10	13	AUTS2,missense_variant,,ENSMMUT00000024846,;	A	ENSMMUG00000017675	ENSMMUT00000024846	Transcript	missense_variant	829	829	277	P/T	Ccg/Acg	rs283147243			1	AUTS2	VGNC		protein_coding	YES		ENSMMUP00000023254		F6UAV9.45	UPI001236C55A	6/18		PANTHER:PTHR14429,PANTHER:PTHR14429:SF5,MobiDB_lite:mobidb-lite,MobiDB_lite:mobidb-lite,Low_complexity_(Seg):seg	MODERATE
AUTS2	Mmul_10	3	50932989	50932989	+	Missense_Mutation	SNP	C	C	A	rs283147243	18111	NORMAL	C	C	ENSMMUT00000024846	6/18	19	13	6	AUTS2,missense_variant,,ENSMMUT00000024846,;	A	ENSMMUG00000017675	ENSMMUT00000024846	Transcript	missense_variant	829	829	277	P/T	Ccg/Acg	rs283147243			1	AUTS2	VGNC		protein_coding	YES		ENSMMUP00000023254		F6UAV9.45	UPI001236C55A	6/18		PANTHER:PTHR14429,PANTHER:PTHR14429:SF5,MobiDB_lite:mobidb-lite,MobiDB_lite:mobidb-lite,Low_complexity_(Seg):seg	MODERATE
AUTS2	Mmul_10	3	50932989	50932989	+	Missense_Mutation	SNP	C	C	A	rs283147243	18112	NORMAL	C	C	ENSMMUT00000024846	6/18	29	12	17	AUTS2,missense_variant,,ENSMMUT00000024846,;	A	ENSMMUG00000017675	ENSMMUT00000024846	Transcript	missense_variant	829	829	277	P/T	Ccg/Acg	rs283147243			1	AUTS2	VGNC		protein_coding	YES		ENSMMUP00000023254		F6UAV9.45	UPI001236C55A	6/18		PANTHER:PTHR14429,PANTHER:PTHR14429:SF5,MobiDB_lite:mobidb-lite,MobiDB_lite:mobidb-lite,Low_complexity_(Seg):seg	MODERATE
AUTS2	Mmul_10	3	50932989	50932989	+	Missense_Mutation	SNP	C	C	A	rs283147243	18113	NORMAL	C	C	ENSMMUT00000024846	6/18	36	15	21	AUTS2,missense_variant,,ENSMMUT00000024846,;	A	ENSMMUG00000017675	ENSMMUT00000024846	Transcript	missense_variant	829	829	277	P/T	Ccg/Acg	rs283147243			1	AUTS2	VGNC		protein_coding	YES		ENSMMUP00000023254		F6UAV9.45	UPI001236C55A	6/18		PANTHER:PTHR14429,PANTHER:PTHR14429:SF5,MobiDB_lite:mobidb-lite,MobiDB_lite:mobidb-lite,Low_complexity_(Seg):seg	MODERATE
AUTS2	Mmul_10	3	50932989	50932989	+	Missense_Mutation	SNP	C	C	A	rs283147243	18129	NORMAL	C	C	ENSMMUT00000024846	6/18	32	18	14	AUTS2,missense_variant,,ENSMMUT00000024846,;	A	ENSMMUG00000017675	ENSMMUT00000024846	Transcript	missense_variant	829	829	277	P/T	Ccg/Acg	rs283147243			1	AUTS2	VGNC		protein_coding	YES		ENSMMUP00000023254		F6UAV9.45	UPI001236C55A	6/18		PANTHER:PTHR14429,PANTHER:PTHR14429:SF5,MobiDB_lite:mobidb-lite,MobiDB_lite:mobidb-lite,Low_complexity_(Seg):seg	MODERATE
AUTS2	Mmul_10	3	50932989	50932989	+	Missense_Mutation	SNP	C	C	A	rs283147243	18147	NORMAL	C	C	ENSMMUT00000024846	6/18	26	9	17	AUTS2,missense_variant,,ENSMMUT00000024846,;	A	ENSMMUG00000017675	ENSMMUT00000024846	Transcript	missense_variant	829	829	277	P/T	Ccg/Acg	rs283147243			1	AUTS2	VGNC		protein_coding	YES		ENSMMUP00000023254		F6UAV9.45	UPI001236C55A	6/18		PANTHER:PTHR14429,PANTHER:PTHR14429:SF5,MobiDB_lite:mobidb-lite,MobiDB_lite:mobidb-lite,Low_complexity_(Seg):seg	MODERATE
AUTS2	Mmul_10	3	50932989	50932989	+	Missense_Mutation	SNP	C	C	A	rs283147243	18167	NORMAL	C	C	ENSMMUT00000024846	6/18	27	9	18	AUTS2,missense_variant,,ENSMMUT00000024846,;	A	ENSMMUG00000017675	ENSMMUT00000024846	Transcript	missense_variant	829	829	277	P/T	Ccg/Acg	rs283147243			1	AUTS2	VGNC		protein_coding	YES		ENSMMUP00000023254		F6UAV9.45	UPI001236C55A	6/18		PANTHER:PTHR14429,PANTHER:PTHR14429:SF5,MobiDB_lite:mobidb-lite,MobiDB_lite:mobidb-lite,Low_complexity_(Seg):seg	MODERATE
AUTS2	Mmul_10	3	50932989	50932989	+	Missense_Mutation	SNP	C	C	A	rs283147243	18205	NORMAL	C	C	ENSMMUT00000024846	6/18	23	10	13	AUTS2,missense_variant,,ENSMMUT00000024846,;	A	ENSMMUG00000017675	ENSMMUT00000024846	Transcript	missense_variant	829	829	277	P/T	Ccg/Acg	rs283147243			1	AUTS2	VGNC		protein_coding	YES		ENSMMUP00000023254		F6UAV9.45	UPI001236C55A	6/18		PANTHER:PTHR14429,PANTHER:PTHR14429:SF5,MobiDB_lite:mobidb-lite,MobiDB_lite:mobidb-lite,Low_complexity_(Seg):seg	MODERATE
AUTS2	Mmul_10	3	50932989	50932989	+	Missense_Mutation	SNP	C	C	A	rs283147243	18208	NORMAL	C	C	ENSMMUT00000024846	6/18	46	26	20	AUTS2,missense_variant,,ENSMMUT00000024846,;	A	ENSMMUG00000017675	ENSMMUT00000024846	Transcript	missense_variant	829	829	277	P/T	Ccg/Acg	rs283147243			1	AUTS2	VGNC		protein_coding	YES		ENSMMUP00000023254		F6UAV9.45	UPI001236C55A	6/18		PANTHER:PTHR14429,PANTHER:PTHR14429:SF5,MobiDB_lite:mobidb-lite,MobiDB_lite:mobidb-lite,Low_complexity_(Seg):seg	MODERATE
AUTS2	Mmul_10	3	50932989	50932989	+	Missense_Mutation	SNP	C	C	A	rs283147243	21742	NORMAL	C	C	ENSMMUT00000024846	6/18	39	15	24	AUTS2,missense_variant,,ENSMMUT00000024846,;	A	ENSMMUG00000017675	ENSMMUT00000024846	Transcript	missense_variant	829	829	277	P/T	Ccg/Acg	rs283147243			1	AUTS2	VGNC		protein_coding	YES		ENSMMUP00000023254		F6UAV9.45	UPI001236C55A	6/18		PANTHER:PTHR14429,PANTHER:PTHR14429:SF5,MobiDB_lite:mobidb-lite,MobiDB_lite:mobidb-lite,Low_complexity_(Seg):seg	MODERATE
AUTS2	Mmul_10	3	50932989	50932989	+	Missense_Mutation	SNP	C	C	A	rs283147243	22435	NORMAL	C	C	ENSMMUT00000024846	6/18	32	19	13	AUTS2,missense_variant,,ENSMMUT00000024846,;	A	ENSMMUG00000017675	ENSMMUT00000024846	Transcript	missense_variant	829	829	277	P/T	Ccg/Acg	rs283147243			1	AUTS2	VGNC		protein_coding	YES		ENSMMUP00000023254		F6UAV9.45	UPI001236C55A	6/18		PANTHER:PTHR14429,PANTHER:PTHR14429:SF5,MobiDB_lite:mobidb-lite,MobiDB_lite:mobidb-lite,Low_complexity_(Seg):seg	MODERATE
AUTS2	Mmul_10	3	50932989	50932989	+	Missense_Mutation	SNP	C	C	A	rs283147243	22523	NORMAL	C	C	ENSMMUT00000024846	6/18	28	13	15	AUTS2,missense_variant,,ENSMMUT00000024846,;	A	ENSMMUG00000017675	ENSMMUT00000024846	Transcript	missense_variant	829	829	277	P/T	Ccg/Acg	rs283147243			1	AUTS2	VGNC		protein_coding	YES		ENSMMUP00000023254		F6UAV9.45	UPI001236C55A	6/18		PANTHER:PTHR14429,PANTHER:PTHR14429:SF5,MobiDB_lite:mobidb-lite,MobiDB_lite:mobidb-lite,Low_complexity_(Seg):seg	MODERATE
AUTS2	Mmul_10	3	50932989	50932989	+	Missense_Mutation	SNP	C	C	A	rs283147243	23001	NORMAL	C	C	ENSMMUT00000024846	6/18	26	15	11	AUTS2,missense_variant,,ENSMMUT00000024846,;	A	ENSMMUG00000017675	ENSMMUT00000024846	Transcript	missense_variant	829	829	277	P/T	Ccg/Acg	rs283147243			1	AUTS2	VGNC		protein_coding	YES		ENSMMUP00000023254		F6UAV9.45	UPI001236C55A	6/18		PANTHER:PTHR14429,PANTHER:PTHR14429:SF5,MobiDB_lite:mobidb-lite,MobiDB_lite:mobidb-lite,Low_complexity_(Seg):seg	MODERATE
AUTS2	Mmul_10	3	50932989	50932989	+	Missense_Mutation	SNP	C	C	A	rs283147243	26661	NORMAL	C	C	ENSMMUT00000024846	6/18	38	21	17	AUTS2,missense_variant,,ENSMMUT00000024846,;	A	ENSMMUG00000017675	ENSMMUT00000024846	Transcript	missense_variant	829	829	277	P/T	Ccg/Acg	rs283147243			1	AUTS2	VGNC		protein_coding	YES		ENSMMUP00000023254		F6UAV9.45	UPI001236C55A	6/18		PANTHER:PTHR14429,PANTHER:PTHR14429:SF5,MobiDB_lite:mobidb-lite,MobiDB_lite:mobidb-lite,Low_complexity_(Seg):seg	MODERATE
AUTS2	Mmul_10	3	50932989	50932989	+	Missense_Mutation	SNP	C	C	A	rs283147243	27515	NORMAL	C	C	ENSMMUT00000024846	6/18	20	14	6	AUTS2,missense_variant,,ENSMMUT00000024846,;	A	ENSMMUG00000017675	ENSMMUT00000024846	Transcript	missense_variant	829	829	277	P/T	Ccg/Acg	rs283147243			1	AUTS2	VGNC		protein_coding	YES		ENSMMUP00000023254		F6UAV9.45	UPI001236C55A	6/18		PANTHER:PTHR14429,PANTHER:PTHR14429:SF5,MobiDB_lite:mobidb-lite,MobiDB_lite:mobidb-lite,Low_complexity_(Seg):seg	MODERATE
AUTS2	Mmul_10	3	50932989	50932989	+	Missense_Mutation	SNP	C	C	A	rs283147243	27521	NORMAL	C	C	ENSMMUT00000024846	6/18	30	13	17	AUTS2,missense_variant,,ENSMMUT00000024846,;	A	ENSMMUG00000017675	ENSMMUT00000024846	Transcript	missense_variant	829	829	277	P/T	Ccg/Acg	rs283147243			1	AUTS2	VGNC		protein_coding	YES		ENSMMUP00000023254		F6UAV9.45	UPI001236C55A	6/18		PANTHER:PTHR14429,PANTHER:PTHR14429:SF5,MobiDB_lite:mobidb-lite,MobiDB_lite:mobidb-lite,Low_complexity_(Seg):seg	MODERATE
AUTS2	Mmul_10	3	50932989	50932989	+	Missense_Mutation	SNP	C	C	A	rs283147243	30325	NORMAL	C	C	ENSMMUT00000024846	6/18	20	10	10	AUTS2,missense_variant,,ENSMMUT00000024846,;	A	ENSMMUG00000017675	ENSMMUT00000024846	Transcript	missense_variant	829	829	277	P/T	Ccg/Acg	rs283147243			1	AUTS2	VGNC		protein_coding	YES		ENSMMUP00000023254		F6UAV9.45	UPI001236C55A	6/18		PANTHER:PTHR14429,PANTHER:PTHR14429:SF5,MobiDB_lite:mobidb-lite,MobiDB_lite:mobidb-lite,Low_complexity_(Seg):seg	MODERATE
AXIN2	Mmul_10	16	61932058	61932058	+	Missense_Mutation	SNP	G	G	A	novel	17874	NORMAL	G	G	ENSMMUT00000080252	9/12	26	13	13	AXIN2,missense_variant,,ENSMMUT00000080252,;AXIN2,missense_variant,,ENSMMUT00000091776,;AXIN2,missense_variant,,ENSMMUT00000092031,;AXIN2,missense_variant,,ENSMMUT00000092660,;AXIN2,missense_variant,,ENSMMUT00000099906,;	A	ENSMMUG00000060015	ENSMMUT00000080252	Transcript	missense_variant	2689	2080	694	R/C	Cgt/Tgt				-1	AXIN2	HGNC	HGNC:904	protein_coding	YES		ENSMMUP00000076172		A0A5F8AE66.5	UPI0003AB7954	9/12		PANTHER:PTHR46102:SF1,PANTHER:PTHR46102	MODERATE
AXIN2	Mmul_10	16	61932058	61932058	+	Missense_Mutation	SNP	G	G	A	novel	18206	NORMAL	G	G	ENSMMUT00000080252	9/12	33	20	13	AXIN2,missense_variant,,ENSMMUT00000080252,;AXIN2,missense_variant,,ENSMMUT00000091776,;AXIN2,missense_variant,,ENSMMUT00000092031,;AXIN2,missense_variant,,ENSMMUT00000092660,;AXIN2,missense_variant,,ENSMMUT00000099906,;	A	ENSMMUG00000060015	ENSMMUT00000080252	Transcript	missense_variant	2689	2080	694	R/C	Cgt/Tgt				-1	AXIN2	HGNC	HGNC:904	protein_coding	YES		ENSMMUP00000076172		A0A5F8AE66.5	UPI0003AB7954	9/12		PANTHER:PTHR46102:SF1,PANTHER:PTHR46102	MODERATE
AXIN2	Mmul_10	16	61933228	61933230	+	In_Frame_Del	DEL	TGG	TGG	-	novel	23903	NORMAL	TGG	TGG	ENSMMUT00000080252	7/12	25	22	3	AXIN2,inframe_deletion,,ENSMMUT00000080252,;AXIN2,inframe_deletion,,ENSMMUT00000091776,;AXIN2,inframe_deletion,,ENSMMUT00000092031,;AXIN2,inframe_deletion,,ENSMMUT00000092660,;AXIN2,inframe_deletion,,ENSMMUT00000099906,;	-	ENSMMUG00000060015	ENSMMUT00000080252	Transcript	inframe_deletion	2085-2087	1476-1478	492-493	HH/H	caCCAt/cat				-1	AXIN2	HGNC	HGNC:904	protein_coding	YES		ENSMMUP00000076172		A0A5F8AE66.5	UPI0003AB7954	7/12		Low_complexity_(Seg):seg,MobiDB_lite:mobidb-lite,PANTHER:PTHR46102:SF1,PANTHER:PTHR46102	MODERATE
AXIN2	Mmul_10	16	61933804	61933804	+	Missense_Mutation	SNP	G	G	A	novel	17874	NORMAL	G	G	ENSMMUT00000080252	6/12	34	12	22	AXIN2,missense_variant,,ENSMMUT00000080252,;AXIN2,missense_variant,,ENSMMUT00000091776,;AXIN2,missense_variant,,ENSMMUT00000092031,;AXIN2,missense_variant,,ENSMMUT00000092660,;AXIN2,missense_variant,,ENSMMUT00000099906,;	A	ENSMMUG00000060015	ENSMMUT00000080252	Transcript	missense_variant	1825	1216	406	R/C	Cgc/Tgc				-1	AXIN2	HGNC	HGNC:904	protein_coding	YES		ENSMMUP00000076172		A0A5F8AE66.5	UPI0003AB7954	6/12		Low_complexity_(Seg):seg,Coiled-coils_(Ncoils):Coil,PANTHER:PTHR46102:SF1,PANTHER:PTHR46102	MODERATE
AXIN2	Mmul_10	16	61933804	61933804	+	Missense_Mutation	SNP	G	G	A	novel	18206	NORMAL	G	G	ENSMMUT00000080252	6/12	31	12	19	AXIN2,missense_variant,,ENSMMUT00000080252,;AXIN2,missense_variant,,ENSMMUT00000091776,;AXIN2,missense_variant,,ENSMMUT00000092031,;AXIN2,missense_variant,,ENSMMUT00000092660,;AXIN2,missense_variant,,ENSMMUT00000099906,;	A	ENSMMUG00000060015	ENSMMUT00000080252	Transcript	missense_variant	1825	1216	406	R/C	Cgc/Tgc				-1	AXIN2	HGNC	HGNC:904	protein_coding	YES		ENSMMUP00000076172		A0A5F8AE66.5	UPI0003AB7954	6/12		Low_complexity_(Seg):seg,Coiled-coils_(Ncoils):Coil,PANTHER:PTHR46102:SF1,PANTHER:PTHR46102	MODERATE
AXIN2	Mmul_10	16	61933804	61933804	+	Missense_Mutation	SNP	G	G	A	novel	26440	NORMAL	G	G	ENSMMUT00000080252	6/12	20	13	7	AXIN2,missense_variant,,ENSMMUT00000080252,;AXIN2,missense_variant,,ENSMMUT00000091776,;AXIN2,missense_variant,,ENSMMUT00000092031,;AXIN2,missense_variant,,ENSMMUT00000092660,;AXIN2,missense_variant,,ENSMMUT00000099906,;	A	ENSMMUG00000060015	ENSMMUT00000080252	Transcript	missense_variant	1825	1216	406	R/C	Cgc/Tgc				-1	AXIN2	HGNC	HGNC:904	protein_coding	YES		ENSMMUP00000076172		A0A5F8AE66.5	UPI0003AB7954	6/12		Low_complexity_(Seg):seg,Coiled-coils_(Ncoils):Coil,PANTHER:PTHR46102:SF1,PANTHER:PTHR46102	MODERATE
BARD1	Mmul_10	12	102155916	102155916	+	Missense_Mutation	SNP	G	G	C	rs304660551	17694	NORMAL	G	G	ENSMMUT00000008002	4/11	32	14	18	BARD1,missense_variant,,ENSMMUT00000008002,;	C	ENSMMUG00000005700	ENSMMUT00000008002	Transcript	missense_variant	1309	922	308	L/V	Ctt/Gtt	rs304660551			-1	BARD1	VGNC		protein_coding	YES		ENSMMUP00000007521		F6U4Z0.68	UPI0010A2A3CE	4/11		PANTHER:PTHR24171	MODERATE
BARD1	Mmul_10	12	102155916	102155916	+	Missense_Mutation	SNP	G	G	C	rs304660551	18022	NORMAL	G	G	ENSMMUT00000008002	4/11	25	14	11	BARD1,missense_variant,,ENSMMUT00000008002,;	C	ENSMMUG00000005700	ENSMMUT00000008002	Transcript	missense_variant	1309	922	308	L/V	Ctt/Gtt	rs304660551			-1	BARD1	VGNC		protein_coding	YES		ENSMMUP00000007521		F6U4Z0.68	UPI0010A2A3CE	4/11		PANTHER:PTHR24171	MODERATE
BARD1	Mmul_10	12	102155916	102155916	+	Missense_Mutation	SNP	G	G	C	rs304660551	18090	NORMAL	G	G	ENSMMUT00000008002	4/11	30	18	12	BARD1,missense_variant,,ENSMMUT00000008002,;	C	ENSMMUG00000005700	ENSMMUT00000008002	Transcript	missense_variant	1309	922	308	L/V	Ctt/Gtt	rs304660551			-1	BARD1	VGNC		protein_coding	YES		ENSMMUP00000007521		F6U4Z0.68	UPI0010A2A3CE	4/11		PANTHER:PTHR24171	MODERATE
BARD1	Mmul_10	12	102155916	102155916	+	Missense_Mutation	SNP	G	G	C	rs304660551	18122	NORMAL	G	G	ENSMMUT00000008002	4/11	27	16	11	BARD1,missense_variant,,ENSMMUT00000008002,;	C	ENSMMUG00000005700	ENSMMUT00000008002	Transcript	missense_variant	1309	922	308	L/V	Ctt/Gtt	rs304660551			-1	BARD1	VGNC		protein_coding	YES		ENSMMUP00000007521		F6U4Z0.68	UPI0010A2A3CE	4/11		PANTHER:PTHR24171	MODERATE
BARD1	Mmul_10	12	102155916	102155916	+	Missense_Mutation	SNP	G	G	C	rs304660551	18200	NORMAL	G	G	ENSMMUT00000008002	4/11	26	11	15	BARD1,missense_variant,,ENSMMUT00000008002,;	C	ENSMMUG00000005700	ENSMMUT00000008002	Transcript	missense_variant	1309	922	308	L/V	Ctt/Gtt	rs304660551			-1	BARD1	VGNC		protein_coding	YES		ENSMMUP00000007521		F6U4Z0.68	UPI0010A2A3CE	4/11		PANTHER:PTHR24171	MODERATE
BARD1	Mmul_10	12	102155916	102155916	+	Missense_Mutation	SNP	G	G	C	rs304660551	22523	NORMAL	G	G	ENSMMUT00000008002	4/11	20	9	11	BARD1,missense_variant,,ENSMMUT00000008002,;	C	ENSMMUG00000005700	ENSMMUT00000008002	Transcript	missense_variant	1309	922	308	L/V	Ctt/Gtt	rs304660551			-1	BARD1	VGNC		protein_coding	YES		ENSMMUP00000007521		F6U4Z0.68	UPI0010A2A3CE	4/11		PANTHER:PTHR24171	MODERATE
BARD1	Mmul_10	12	102155916	102155916	+	Missense_Mutation	SNP	G	G	C	rs304660551	25329	NORMAL	G	G	ENSMMUT00000008002	4/11	26	11	15	BARD1,missense_variant,,ENSMMUT00000008002,;	C	ENSMMUG00000005700	ENSMMUT00000008002	Transcript	missense_variant	1309	922	308	L/V	Ctt/Gtt	rs304660551			-1	BARD1	VGNC		protein_coding	YES		ENSMMUP00000007521		F6U4Z0.68	UPI0010A2A3CE	4/11		PANTHER:PTHR24171	MODERATE
BARD1	Mmul_10	12	102155916	102155916	+	Missense_Mutation	SNP	G	G	C	rs304660551	25856	NORMAL	G	G	ENSMMUT00000008002	4/11	35	14	21	BARD1,missense_variant,,ENSMMUT00000008002,;	C	ENSMMUG00000005700	ENSMMUT00000008002	Transcript	missense_variant	1309	922	308	L/V	Ctt/Gtt	rs304660551			-1	BARD1	VGNC		protein_coding	YES		ENSMMUP00000007521		F6U4Z0.68	UPI0010A2A3CE	4/11		PANTHER:PTHR24171	MODERATE
BARD1	Mmul_10	12	102155916	102155916	+	Missense_Mutation	SNP	G	G	C	rs304660551	25891	NORMAL	G	G	ENSMMUT00000008002	4/11	17	9	8	BARD1,missense_variant,,ENSMMUT00000008002,;	C	ENSMMUG00000005700	ENSMMUT00000008002	Transcript	missense_variant	1309	922	308	L/V	Ctt/Gtt	rs304660551			-1	BARD1	VGNC		protein_coding	YES		ENSMMUP00000007521		F6U4Z0.68	UPI0010A2A3CE	4/11		PANTHER:PTHR24171	MODERATE
BARD1	Mmul_10	12	102155916	102155916	+	Missense_Mutation	SNP	G	G	C	rs304660551	26661	NORMAL	G	G	ENSMMUT00000008002	4/11	43	17	26	BARD1,missense_variant,,ENSMMUT00000008002,;	C	ENSMMUG00000005700	ENSMMUT00000008002	Transcript	missense_variant	1309	922	308	L/V	Ctt/Gtt	rs304660551			-1	BARD1	VGNC		protein_coding	YES		ENSMMUP00000007521		F6U4Z0.68	UPI0010A2A3CE	4/11		PANTHER:PTHR24171	MODERATE
BARD1	Mmul_10	12	102156302	102156302	+	Missense_Mutation	SNP	G	G	A	novel	27513	NORMAL	G	G	ENSMMUT00000008002	4/11	30	12	18	BARD1,missense_variant,,ENSMMUT00000008002,;	A	ENSMMUG00000005700	ENSMMUT00000008002	Transcript	missense_variant	923	536	179	S/F	tCc/tTc				-1	BARD1	VGNC		protein_coding	YES		ENSMMUP00000007521		F6U4Z0.68	UPI0010A2A3CE	4/11		PANTHER:PTHR24171,MobiDB_lite:mobidb-lite,MobiDB_lite:mobidb-lite	MODERATE
BCL11B	Mmul_10	7	161374628	161374628	+	Missense_Mutation	SNP	T	T	C	novel	18098	NORMAL	T	T	ENSMMUT00000094202	4/4	41	19	22	BCL11B,missense_variant,,ENSMMUT00000004611,;BCL11B,missense_variant,,ENSMMUT00000004612,;BCL11B,missense_variant,,ENSMMUT00000062854,;BCL11B,missense_variant,,ENSMMUT00000094202,;	C	ENSMMUG00000003261	ENSMMUT00000094202	Transcript	missense_variant	1176	664	222	I/V	Att/Gtt				-1	BCL11B	VGNC		protein_coding	YES		ENSMMUP00000080850		A0A5F8ASB7.5	UPI00006D502D	4/4		PROSITE_profiles:PS50157,PANTHER:PTHR45993,PANTHER:PTHR45993:SF4,SMART:SM00355	MODERATE
BCL11B	Mmul_10	7	161374628	161374628	+	Missense_Mutation	SNP	T	T	C	novel	18100	NORMAL	T	T	ENSMMUT00000094202	4/4	22	17	5	BCL11B,missense_variant,,ENSMMUT00000004611,;BCL11B,missense_variant,,ENSMMUT00000004612,;BCL11B,missense_variant,,ENSMMUT00000062854,;BCL11B,missense_variant,,ENSMMUT00000094202,;	C	ENSMMUG00000003261	ENSMMUT00000094202	Transcript	missense_variant	1176	664	222	I/V	Att/Gtt				-1	BCL11B	VGNC		protein_coding	YES		ENSMMUP00000080850		A0A5F8ASB7.5	UPI00006D502D	4/4		PROSITE_profiles:PS50157,PANTHER:PTHR45993,PANTHER:PTHR45993:SF4,SMART:SM00355	MODERATE
BCL11B	Mmul_10	7	161374628	161374628	+	Missense_Mutation	SNP	T	T	C	novel	18110	NORMAL	T	T	ENSMMUT00000094202	4/4	35	16	19	BCL11B,missense_variant,,ENSMMUT00000004611,;BCL11B,missense_variant,,ENSMMUT00000004612,;BCL11B,missense_variant,,ENSMMUT00000062854,;BCL11B,missense_variant,,ENSMMUT00000094202,;	C	ENSMMUG00000003261	ENSMMUT00000094202	Transcript	missense_variant	1176	664	222	I/V	Att/Gtt				-1	BCL11B	VGNC		protein_coding	YES		ENSMMUP00000080850		A0A5F8ASB7.5	UPI00006D502D	4/4		PROSITE_profiles:PS50157,PANTHER:PTHR45993,PANTHER:PTHR45993:SF4,SMART:SM00355	MODERATE
BCL6	Mmul_10	2	10094383	10094383	+	Missense_Mutation	SNP	C	C	T	rs1083698548	17944	NORMAL	C	C	ENSMMUT00000086850	5/11	20	6	14	BCL6,missense_variant,,ENSMMUT00000012862,;BCL6,missense_variant,,ENSMMUT00000080360,;BCL6,missense_variant,,ENSMMUT00000086850,;BCL6,missense_variant,,ENSMMUT00000089457,;BCL6,missense_variant,,ENSMMUT00000097173,;	T	ENSMMUG00000009198	ENSMMUT00000086850	Transcript	missense_variant	956	848	283	P/L	cCt/cTt	rs1083698548			1	BCL6	VGNC		protein_coding	YES		ENSMMUP00000081064		A0A5F8AUC8.5	UPI001234D53B	5/11		PANTHER:PTHR24399,PANTHER:PTHR24399:SF29	MODERATE
BCL6	Mmul_10	2	10094623	10094623	+	Missense_Mutation	SNP	C	C	T	novel	18105	NORMAL	C	C	ENSMMUT00000086850	5/11	5	3	2	BCL6,missense_variant,,ENSMMUT00000012862,;BCL6,missense_variant,,ENSMMUT00000080360,;BCL6,missense_variant,,ENSMMUT00000086850,;BCL6,missense_variant,,ENSMMUT00000089457,;BCL6,missense_variant,,ENSMMUT00000097173,;	T	ENSMMUG00000009198	ENSMMUT00000086850	Transcript	missense_variant	1196	1088	363	P/L	cCa/cTa				1	BCL6	VGNC		protein_coding	YES		ENSMMUP00000081064		A0A5F8AUC8.5	UPI001234D53B	5/11		PANTHER:PTHR24399,PANTHER:PTHR24399:SF29	MODERATE
BCL9	Mmul_10	1	102480244	102480244	+	Missense_Mutation	SNP	C	C	T	novel	17893	NORMAL	C	C	ENSMMUT00000023584	10/10	28	15	13	BCL9,missense_variant,,ENSMMUT00000023584,;	T	ENSMMUG00000016786	ENSMMUT00000023584	Transcript	missense_variant	4798	4157	1386	G/D	gGc/gAc				-1	BCL9	VGNC		protein_coding	YES		ENSMMUP00000022067		F7D4Z2.62,G7MG41.5	UPI00006D10BC	10/10		Low_complexity_(Seg):seg,PANTHER:PTHR15185:SF5,PANTHER:PTHR15185	MODERATE
BCL9	Mmul_10	1	102484840	102484840	+	Missense_Mutation	SNP	G	G	A	rs1081398347	17591	NORMAL	G	G	ENSMMUT00000023584	8/10	29	11	18	BCL9,missense_variant,,ENSMMUT00000023584,;	A	ENSMMUG00000016786	ENSMMUT00000023584	Transcript	missense_variant	2733	2092	698	P/S	Ccc/Tcc	rs1081398347			-1	BCL9	VGNC		protein_coding	YES		ENSMMUP00000022067		F7D4Z2.62,G7MG41.5	UPI00006D10BC	8/10		PANTHER:PTHR15185:SF5,PANTHER:PTHR15185	MODERATE
BCL9	Mmul_10	1	102484840	102484840	+	Missense_Mutation	SNP	G	G	A	rs1081398347	17857	NORMAL	G	G	ENSMMUT00000023584	8/10	28	13	15	BCL9,missense_variant,,ENSMMUT00000023584,;	A	ENSMMUG00000016786	ENSMMUT00000023584	Transcript	missense_variant	2733	2092	698	P/S	Ccc/Tcc	rs1081398347			-1	BCL9	VGNC		protein_coding	YES		ENSMMUP00000022067		F7D4Z2.62,G7MG41.5	UPI00006D10BC	8/10		PANTHER:PTHR15185:SF5,PANTHER:PTHR15185	MODERATE
BCL9	Mmul_10	1	102484840	102484840	+	Missense_Mutation	SNP	G	G	A	rs1081398347	18112	NORMAL	G	G	ENSMMUT00000023584	8/10	19	13	6	BCL9,missense_variant,,ENSMMUT00000023584,;	A	ENSMMUG00000016786	ENSMMUT00000023584	Transcript	missense_variant	2733	2092	698	P/S	Ccc/Tcc	rs1081398347			-1	BCL9	VGNC		protein_coding	YES		ENSMMUP00000022067		F7D4Z2.62,G7MG41.5	UPI00006D10BC	8/10		PANTHER:PTHR15185:SF5,PANTHER:PTHR15185	MODERATE
BCL9	Mmul_10	1	102484840	102484840	+	Missense_Mutation	SNP	G	G	A	rs1081398347	18222	NORMAL	G	G	ENSMMUT00000023584	8/10	26	12	14	BCL9,missense_variant,,ENSMMUT00000023584,;	A	ENSMMUG00000016786	ENSMMUT00000023584	Transcript	missense_variant	2733	2092	698	P/S	Ccc/Tcc	rs1081398347			-1	BCL9	VGNC		protein_coding	YES		ENSMMUP00000022067		F7D4Z2.62,G7MG41.5	UPI00006D10BC	8/10		PANTHER:PTHR15185:SF5,PANTHER:PTHR15185	MODERATE
BCL9	Mmul_10	1	102484841	102484841	+	Missense_Mutation	SNP	C	C	T	rs296712754	17591	NORMAL	C	C	ENSMMUT00000023584	8/10	29	11	18	BCL9,missense_variant,,ENSMMUT00000023584,;	T	ENSMMUG00000016786	ENSMMUT00000023584	Transcript	missense_variant	2732	2091	697	M/I	atG/atA	rs296712754			-1	BCL9	VGNC		protein_coding	YES		ENSMMUP00000022067		F7D4Z2.62,G7MG41.5	UPI00006D10BC	8/10		PANTHER:PTHR15185:SF5,PANTHER:PTHR15185	MODERATE
BCL9	Mmul_10	1	102484841	102484841	+	Missense_Mutation	SNP	C	C	T	rs296712754	17857	NORMAL	C	C	ENSMMUT00000023584	8/10	28	13	15	BCL9,missense_variant,,ENSMMUT00000023584,;	T	ENSMMUG00000016786	ENSMMUT00000023584	Transcript	missense_variant	2732	2091	697	M/I	atG/atA	rs296712754			-1	BCL9	VGNC		protein_coding	YES		ENSMMUP00000022067		F7D4Z2.62,G7MG41.5	UPI00006D10BC	8/10		PANTHER:PTHR15185:SF5,PANTHER:PTHR15185	MODERATE
BCL9	Mmul_10	1	102484841	102484841	+	Missense_Mutation	SNP	C	C	T	rs296712754	18112	NORMAL	C	C	ENSMMUT00000023584	8/10	19	13	6	BCL9,missense_variant,,ENSMMUT00000023584,;	T	ENSMMUG00000016786	ENSMMUT00000023584	Transcript	missense_variant	2732	2091	697	M/I	atG/atA	rs296712754			-1	BCL9	VGNC		protein_coding	YES		ENSMMUP00000022067		F7D4Z2.62,G7MG41.5	UPI00006D10BC	8/10		PANTHER:PTHR15185:SF5,PANTHER:PTHR15185	MODERATE
BCL9	Mmul_10	1	102484841	102484841	+	Missense_Mutation	SNP	C	C	T	rs296712754	18222	NORMAL	C	C	ENSMMUT00000023584	8/10	26	12	14	BCL9,missense_variant,,ENSMMUT00000023584,;	T	ENSMMUG00000016786	ENSMMUT00000023584	Transcript	missense_variant	2732	2091	697	M/I	atG/atA	rs296712754			-1	BCL9	VGNC		protein_coding	YES		ENSMMUP00000022067		F7D4Z2.62,G7MG41.5	UPI00006D10BC	8/10		PANTHER:PTHR15185:SF5,PANTHER:PTHR15185	MODERATE
BCL9	Mmul_10	1	102484941	102484941	+	Missense_Mutation	SNP	C	C	G	rs306388200	17943	NORMAL	C	C	ENSMMUT00000023584	8/10	23	10	13	BCL9,missense_variant,,ENSMMUT00000023584,;	G	ENSMMUG00000016786	ENSMMUT00000023584	Transcript	missense_variant	2632	1991	664	G/A	gGc/gCc	rs306388200			-1	BCL9	VGNC		protein_coding	YES		ENSMMUP00000022067		F7D4Z2.62,G7MG41.5	UPI00006D10BC	8/10		PANTHER:PTHR15185:SF5,PANTHER:PTHR15185	MODERATE
BCL9L	Mmul_10	14	111961733	111961733	+	Missense_Mutation	SNP	T	T	C	novel	18133	NORMAL	T	T	ENSMMUT00000065173	9/9	35	21	14	BCL9L,missense_variant,,ENSMMUT00000013021,;BCL9L,missense_variant,,ENSMMUT00000065173,;BCL9L,missense_variant,,ENSMMUT00000087750,;BCL9L,missense_variant,,ENSMMUT00000090460,;CXCR5,downstream_gene_variant,,ENSMMUT00000013019,;CXCR5,downstream_gene_variant,,ENSMMUT00000106375,;	C	ENSMMUG00000009318	ENSMMUT00000065173	Transcript	missense_variant	3598	3461	1154	Q/R	cAg/cGg				-1	BCL9L	VGNC		protein_coding	YES		ENSMMUP00000055504		A0A1D5R5B7.20	UPI0007328235	9/9		PANTHER:PTHR15185,PANTHER:PTHR15185:SF3	MODERATE
BCOR	Mmul_10	X	39896375	39896375	+	Missense_Mutation	SNP	A	A	G	novel	18147	NORMAL	A	A	ENSMMUT00000007445	8/16	19	7	12	BCOR,missense_variant,,ENSMMUT00000007444,;BCOR,missense_variant,,ENSMMUT00000007445,;BCOR,missense_variant,,ENSMMUT00000056717,;BCOR,missense_variant,,ENSMMUT00000074944,;BCOR,missense_variant,,ENSMMUT00000089681,;	G	ENSMMUG00000005292	ENSMMUT00000007445	Transcript	missense_variant	4555	3722	1241	L/P	cTc/cCc				-1	BCOR	VGNC		protein_coding	YES		ENSMMUP00000006996		F7BB89.57	UPI0010A27D8D	8/16		Pfam:PF15808,PANTHER:PTHR24117,PANTHER:PTHR24117:SF8,MobiDB_lite:mobidb-lite,MobiDB_lite:mobidb-lite	MODERATE
BCOR	Mmul_10	X	39906080	39906080	+	Missense_Mutation	SNP	T	T	A	novel	17893	NORMAL	T	T	ENSMMUT00000007445	4/16	38	17	21	BCOR,missense_variant,,ENSMMUT00000007444,;BCOR,missense_variant,,ENSMMUT00000007445,;BCOR,missense_variant,,ENSMMUT00000056717,;BCOR,missense_variant,,ENSMMUT00000074944,;BCOR,missense_variant,,ENSMMUT00000089681,;	A	ENSMMUG00000005292	ENSMMUT00000007445	Transcript	missense_variant	2803	1970	657	Y/F	tAc/tTc				-1	BCOR	VGNC		protein_coding	YES		ENSMMUP00000006996		F7BB89.57	UPI0010A27D8D	4/16		PANTHER:PTHR24117,PANTHER:PTHR24117:SF8	MODERATE
BCOR	Mmul_10	X	39906162	39906162	+	Nonsense_Mutation	SNP	C	C	A	novel	30325	NORMAL	C	C	ENSMMUT00000007445	4/16	10	8	2	BCOR,stop_gained,,ENSMMUT00000007444,;BCOR,stop_gained,,ENSMMUT00000007445,;BCOR,stop_gained,,ENSMMUT00000056717,;BCOR,stop_gained,,ENSMMUT00000074944,;BCOR,stop_gained,,ENSMMUT00000089681,;	A	ENSMMUG00000005292	ENSMMUT00000007445	Transcript	stop_gained	2721	1888	630	E/*	Gag/Tag				-1	BCOR	VGNC		protein_coding	YES		ENSMMUP00000006996		F7BB89.57	UPI0010A27D8D	4/16		PANTHER:PTHR24117,PANTHER:PTHR24117:SF8	HIGH
BCOR	Mmul_10	X	39906432	39906434	+	In_Frame_Del	DEL	GCT	GCT	-	novel	26661	NORMAL	GCT	GCT	ENSMMUT00000007445	4/16	31	16	15	BCOR,inframe_deletion,,ENSMMUT00000007444,;BCOR,inframe_deletion,,ENSMMUT00000007445,;BCOR,inframe_deletion,,ENSMMUT00000056717,;BCOR,inframe_deletion,,ENSMMUT00000074944,;BCOR,inframe_deletion,,ENSMMUT00000089681,;	-	ENSMMUG00000005292	ENSMMUT00000007445	Transcript	inframe_deletion	2449-2451	1616-1618	539-540	QR/R	cAGCgg/cgg				-1	BCOR	VGNC		protein_coding	YES		ENSMMUP00000006996		F7BB89.57	UPI0010A27D8D	4/16		PANTHER:PTHR24117,PANTHER:PTHR24117:SF8	MODERATE
BCR	Mmul_10	10	29215094	29215094	+	Missense_Mutation	SNP	T	T	G	rs1076596914	17968	NORMAL	T	T	ENSMMUT00000013322	19/23	26	13	13	BCR,missense_variant,,ENSMMUT00000013322,;BCR,missense_variant,,ENSMMUT00000019577,;BCR,missense_variant,,ENSMMUT00000033232,;,downstream_gene_variant,,ENSMMUT00000094020,;	G	ENSMMUG00000023622	ENSMMUT00000013322	Transcript	missense_variant	3232	3232	1078	I/L	Atc/Ctc	rs1076596914			-1	BCR	VGNC		protein_coding	YES		ENSMMUP00000012482		F6Y8F5.75	UPI0010A278F7	19/23		Gene3D:1.10.555.10,Pfam:PF00620,PROSITE_profiles:PS50238,PANTHER:PTHR23182,PANTHER:PTHR23182:SF3,SMART:SM00324,Superfamily:SSF48350,CDD:cd04387	MODERATE
BCR	Mmul_10	10	29215130	29215130	+	Missense_Mutation	SNP	T	T	C	novel	23903	NORMAL	T	T	ENSMMUT00000013322	19/23	33	17	16	BCR,missense_variant,,ENSMMUT00000013322,;BCR,missense_variant,,ENSMMUT00000019577,;BCR,missense_variant,,ENSMMUT00000033232,;,downstream_gene_variant,,ENSMMUT00000094020,;	C	ENSMMUG00000023622	ENSMMUT00000013322	Transcript	missense_variant	3196	3196	1066	K/E	Aag/Gag				-1	BCR	VGNC		protein_coding	YES		ENSMMUP00000012482		F6Y8F5.75	UPI0010A278F7	19/23		Gene3D:1.10.555.10,PROSITE_profiles:PS50238,PANTHER:PTHR23182,PANTHER:PTHR23182:SF3,SMART:SM00324,Superfamily:SSF48350,CDD:cd04387	MODERATE
BCR	Mmul_10	10	29217354	29217354	+	Missense_Mutation	SNP	C	C	T	novel	17943	NORMAL	C	C	ENSMMUT00000013322	17/23	36	27	9	BCR,missense_variant,,ENSMMUT00000013322,;BCR,missense_variant,,ENSMMUT00000019577,;BCR,intron_variant,,ENSMMUT00000033232,;	T	ENSMMUG00000023622	ENSMMUT00000013322	Transcript	missense_variant	3061	3061	1021	A/T	Gcc/Acc				-1	BCR	VGNC		protein_coding	YES		ENSMMUP00000012482		F6Y8F5.75	UPI0010A278F7	17/23		Gene3D:2.60.40.150,PANTHER:PTHR23182,PANTHER:PTHR23182:SF3,Superfamily:SSF49562,CDD:cd08686	MODERATE
BRCA2	Mmul_10	17	11327459	11327459	+	Missense_Mutation	SNP	G	G	C	rs1079307514	27536	NORMAL	G	G	ENSMMUT00000010048	7/28	44	23	21	BRCA2,missense_variant,,ENSMMUT00000010048,;	C	ENSMMUG00000007197	ENSMMUT00000010048	Transcript	missense_variant	652	652	218	E/Q	Gaa/Caa	rs1079307514			1	BRCA2	VGNC		protein_coding	YES		ENSMMUP00000009432		F7ER68.62	UPI0012347DCA	7/28		PIRSF:PIRSF002397,PANTHER:PTHR11289,PANTHER:PTHR11289:SF0	MODERATE
BRCA2	Mmul_10	17	11330645	11330645	+	Missense_Mutation	SNP	C	C	G	novel	30186	NORMAL	C	C	ENSMMUT00000010048	9/28	30	17	13	BRCA2,missense_variant,,ENSMMUT00000010048,;	G	ENSMMUG00000007197	ENSMMUT00000010048	Transcript	missense_variant	1175	1175	392	A/G	gCc/gGc				1	BRCA2	VGNC		protein_coding	YES		ENSMMUP00000009432		F7ER68.62	UPI0012347DCA	9/28		PIRSF:PIRSF002397,PANTHER:PTHR11289,PANTHER:PTHR11289:SF0	MODERATE
BRCA2	Mmul_10	17	11331025	11331025	+	Missense_Mutation	SNP	A	A	G	rs294121213	17943	NORMAL	A	A	ENSMMUT00000010048	9/28	21	7	14	BRCA2,missense_variant,,ENSMMUT00000010048,;	G	ENSMMUG00000007197	ENSMMUT00000010048	Transcript	missense_variant	1555	1555	519	S/G	Agt/Ggt	rs294121213			1	BRCA2	VGNC		protein_coding	YES		ENSMMUP00000009432		F7ER68.62	UPI0012347DCA	9/28		PIRSF:PIRSF002397,PANTHER:PTHR11289,PANTHER:PTHR11289:SF0	MODERATE
BRCA2	Mmul_10	17	11334670	11334670	+	Missense_Mutation	SNP	C	C	G	rs294894788	17943	NORMAL	C	C	ENSMMUT00000010048	10/28	28	17	11	BRCA2,missense_variant,,ENSMMUT00000010048,;	G	ENSMMUG00000007197	ENSMMUT00000010048	Transcript	missense_variant	2318	2318	773	T/S	aCt/aGt	rs294894788			1	BRCA2	VGNC		protein_coding	YES		ENSMMUP00000009432		F7ER68.62	UPI0012347DCA	10/28		PIRSF:PIRSF002397,PANTHER:PTHR11289,PANTHER:PTHR11289:SF0	MODERATE
BRCA2	Mmul_10	17	11335023	11335023	+	Missense_Mutation	SNP	T	T	A	novel	27536	NORMAL	T	T	ENSMMUT00000010048	10/28	28	12	16	BRCA2,missense_variant,,ENSMMUT00000010048,;	A	ENSMMUG00000007197	ENSMMUT00000010048	Transcript	missense_variant	2671	2671	891	F/I	Ttt/Att				1	BRCA2	VGNC		protein_coding	YES		ENSMMUP00000009432		F7ER68.62	UPI0012347DCA	10/28		PIRSF:PIRSF002397,PANTHER:PTHR11289,PANTHER:PTHR11289:SF0	MODERATE
BRCA2	Mmul_10	17	11335055	11335060	+	In_Frame_Del	DEL	TTTTGC	TTTTGC	-	novel	27536	NORMAL	TTTTGC	TTTTGC	ENSMMUT00000010048	10/28	26	10	16	BRCA2,inframe_deletion,,ENSMMUT00000010048,;	-	ENSMMUG00000007197	ENSMMUT00000010048	Transcript	inframe_deletion	2703-2708	2703-2708	901-903	NFA/N	aaTTTTGCt/aat				1	BRCA2	VGNC		protein_coding	YES		ENSMMUP00000009432		F7ER68.62	UPI0012347DCA	10/28		PIRSF:PIRSF002397,PANTHER:PTHR11289,PANTHER:PTHR11289:SF0	MODERATE
BRCA2	Mmul_10	17	11335306	11335306	+	Missense_Mutation	SNP	A	A	G	novel	27536	NORMAL	A	A	ENSMMUT00000010048	10/28	28	19	9	BRCA2,missense_variant,,ENSMMUT00000010048,;	G	ENSMMUG00000007197	ENSMMUT00000010048	Transcript	missense_variant	2954	2954	985	D/G	gAt/gGt				1	BRCA2	VGNC		protein_coding	YES		ENSMMUP00000009432		F7ER68.62	UPI0012347DCA	10/28		PIRSF:PIRSF002397,PANTHER:PTHR11289,PANTHER:PTHR11289:SF0	MODERATE
BRCA2	Mmul_10	17	11335548	11335548	+	Missense_Mutation	SNP	A	A	G	rs287351716	17591	NORMAL	A	A	ENSMMUT00000010048	10/28	22	10	12	BRCA2,missense_variant,,ENSMMUT00000010048,;	G	ENSMMUG00000007197	ENSMMUT00000010048	Transcript	missense_variant	3196	3196	1066	K/E	Aag/Gag	rs287351716			1	BRCA2	VGNC		protein_coding	YES		ENSMMUP00000009432		F7ER68.62	UPI0012347DCA	10/28		PIRSF:PIRSF002397,PANTHER:PTHR11289,PANTHER:PTHR11289:SF0	MODERATE
BRCA2	Mmul_10	17	11335548	11335548	+	Missense_Mutation	SNP	A	A	G	rs287351716	17874	NORMAL	A	A	ENSMMUT00000010048	10/28	21	8	13	BRCA2,missense_variant,,ENSMMUT00000010048,;	G	ENSMMUG00000007197	ENSMMUT00000010048	Transcript	missense_variant	3196	3196	1066	K/E	Aag/Gag	rs287351716			1	BRCA2	VGNC		protein_coding	YES		ENSMMUP00000009432		F7ER68.62	UPI0012347DCA	10/28		PIRSF:PIRSF002397,PANTHER:PTHR11289,PANTHER:PTHR11289:SF0	MODERATE
BRCA2	Mmul_10	17	11335548	11335548	+	Missense_Mutation	SNP	A	A	G	rs287351716	18110	NORMAL	A	A	ENSMMUT00000010048	10/28	25	13	12	BRCA2,missense_variant,,ENSMMUT00000010048,;	G	ENSMMUG00000007197	ENSMMUT00000010048	Transcript	missense_variant	3196	3196	1066	K/E	Aag/Gag	rs287351716			1	BRCA2	VGNC		protein_coding	YES		ENSMMUP00000009432		F7ER68.62	UPI0012347DCA	10/28		PIRSF:PIRSF002397,PANTHER:PTHR11289,PANTHER:PTHR11289:SF0	MODERATE
BRCA2	Mmul_10	17	11335548	11335548	+	Missense_Mutation	SNP	A	A	G	rs287351716	18112	NORMAL	A	A	ENSMMUT00000010048	10/28	30	18	12	BRCA2,missense_variant,,ENSMMUT00000010048,;	G	ENSMMUG00000007197	ENSMMUT00000010048	Transcript	missense_variant	3196	3196	1066	K/E	Aag/Gag	rs287351716			1	BRCA2	VGNC		protein_coding	YES		ENSMMUP00000009432		F7ER68.62	UPI0012347DCA	10/28		PIRSF:PIRSF002397,PANTHER:PTHR11289,PANTHER:PTHR11289:SF0	MODERATE
BRCA2	Mmul_10	17	11335548	11335548	+	Missense_Mutation	SNP	A	A	G	rs287351716	18216	NORMAL	A	A	ENSMMUT00000010048	10/28	24	12	12	BRCA2,missense_variant,,ENSMMUT00000010048,;	G	ENSMMUG00000007197	ENSMMUT00000010048	Transcript	missense_variant	3196	3196	1066	K/E	Aag/Gag	rs287351716			1	BRCA2	VGNC		protein_coding	YES		ENSMMUP00000009432		F7ER68.62	UPI0012347DCA	10/28		PIRSF:PIRSF002397,PANTHER:PTHR11289,PANTHER:PTHR11289:SF0	MODERATE
BRCA2	Mmul_10	17	11335548	11335548	+	Missense_Mutation	SNP	A	A	G	rs287351716	22256	NORMAL	A	A	ENSMMUT00000010048	10/28	24	16	8	BRCA2,missense_variant,,ENSMMUT00000010048,;	G	ENSMMUG00000007197	ENSMMUT00000010048	Transcript	missense_variant	3196	3196	1066	K/E	Aag/Gag	rs287351716			1	BRCA2	VGNC		protein_coding	YES		ENSMMUP00000009432		F7ER68.62	UPI0012347DCA	10/28		PIRSF:PIRSF002397,PANTHER:PTHR11289,PANTHER:PTHR11289:SF0	MODERATE
BRCA2	Mmul_10	17	11335548	11335548	+	Missense_Mutation	SNP	A	A	G	rs287351716	22523	NORMAL	A	A	ENSMMUT00000010048	10/28	39	17	22	BRCA2,missense_variant,,ENSMMUT00000010048,;	G	ENSMMUG00000007197	ENSMMUT00000010048	Transcript	missense_variant	3196	3196	1066	K/E	Aag/Gag	rs287351716			1	BRCA2	VGNC		protein_coding	YES		ENSMMUP00000009432		F7ER68.62	UPI0012347DCA	10/28		PIRSF:PIRSF002397,PANTHER:PTHR11289,PANTHER:PTHR11289:SF0	MODERATE
BRCA2	Mmul_10	17	11335548	11335548	+	Missense_Mutation	SNP	A	A	G	rs287351716	26537	NORMAL	A	A	ENSMMUT00000010048	10/28	28	12	16	BRCA2,missense_variant,,ENSMMUT00000010048,;	G	ENSMMUG00000007197	ENSMMUT00000010048	Transcript	missense_variant	3196	3196	1066	K/E	Aag/Gag	rs287351716			1	BRCA2	VGNC		protein_coding	YES		ENSMMUP00000009432		F7ER68.62	UPI0012347DCA	10/28		PIRSF:PIRSF002397,PANTHER:PTHR11289,PANTHER:PTHR11289:SF0	MODERATE
BRCA2	Mmul_10	17	11335782	11335782	+	Missense_Mutation	SNP	A	A	C	novel	27536	NORMAL	A	A	ENSMMUT00000010048	10/28	24	12	12	BRCA2,missense_variant,,ENSMMUT00000010048,;	C	ENSMMUG00000007197	ENSMMUT00000010048	Transcript	missense_variant	3430	3430	1144	K/Q	Aag/Cag				1	BRCA2	VGNC		protein_coding	YES		ENSMMUP00000009432		F7ER68.62	UPI0012347DCA	10/28		PIRSF:PIRSF002397,PANTHER:PTHR11289,PANTHER:PTHR11289:SF0	MODERATE
BRCA2	Mmul_10	17	11336130	11336130	+	Missense_Mutation	SNP	A	A	G	novel	27536	NORMAL	A	A	ENSMMUT00000010048	10/28	14	7	7	BRCA2,missense_variant,,ENSMMUT00000010048,;	G	ENSMMUG00000007197	ENSMMUT00000010048	Transcript	missense_variant	3778	3778	1260	I/V	Ata/Gta				1	BRCA2	VGNC		protein_coding	YES		ENSMMUP00000009432		F7ER68.62	UPI0012347DCA	10/28		PIRSF:PIRSF002397,PANTHER:PTHR11289,PANTHER:PTHR11289:SF0	MODERATE
BRCA2	Mmul_10	17	11336316	11336318	+	In_Frame_Del	DEL	GAT	GAT	-	novel	27536	NORMAL	GAT	GAT	ENSMMUT00000010048	10/28	27	11	16	BRCA2,inframe_deletion,,ENSMMUT00000010048,;	-	ENSMMUG00000007197	ENSMMUT00000010048	Transcript	inframe_deletion	3964-3966	3964-3966	1322	D/-	GAT/-				1	BRCA2	VGNC		protein_coding	YES		ENSMMUP00000009432		F7ER68.62	UPI0012347DCA	10/28		PIRSF:PIRSF002397,PANTHER:PTHR11289,PANTHER:PTHR11289:SF0	MODERATE
BRCA2	Mmul_10	17	11336660	11336662	+	In_Frame_Del	DEL	TAT	TAT	-	novel	17943	NORMAL	TAT	TAT	ENSMMUT00000010048	10/28	30	11	19	BRCA2,inframe_deletion,,ENSMMUT00000010048,;	-	ENSMMUG00000007197	ENSMMUT00000010048	Transcript	inframe_deletion	4308-4310	4308-4310	1436-1437	NI/N	aaTATt/aat				1	BRCA2	VGNC		protein_coding	YES		ENSMMUP00000009432		F7ER68.62	UPI0012347DCA	10/28		Pfam:PF00634,PIRSF:PIRSF002397,PROSITE_profiles:PS50138,PANTHER:PTHR11289,PANTHER:PTHR11289:SF0	MODERATE
BRCA2	Mmul_10	17	11336877	11336877	+	Missense_Mutation	SNP	G	G	C	rs288156087	18147	NORMAL	G	G	ENSMMUT00000010048	10/28	18	11	7	BRCA2,missense_variant,,ENSMMUT00000010048,;	C	ENSMMUG00000007197	ENSMMUT00000010048	Transcript	missense_variant	4525	4525	1509	E/Q	Gaa/Caa	rs288156087			1	BRCA2	VGNC		protein_coding	YES		ENSMMUP00000009432		F7ER68.62	UPI0012347DCA	10/28		PIRSF:PIRSF002397,PANTHER:PTHR11289,PANTHER:PTHR11289:SF0	MODERATE
BRCA2	Mmul_10	17	11336877	11336877	+	Missense_Mutation	SNP	G	G	C	rs288156087	18208	NORMAL	G	G	ENSMMUT00000010048	10/28	27	13	14	BRCA2,missense_variant,,ENSMMUT00000010048,;	C	ENSMMUG00000007197	ENSMMUT00000010048	Transcript	missense_variant	4525	4525	1509	E/Q	Gaa/Caa	rs288156087			1	BRCA2	VGNC		protein_coding	YES		ENSMMUP00000009432		F7ER68.62	UPI0012347DCA	10/28		PIRSF:PIRSF002397,PANTHER:PTHR11289,PANTHER:PTHR11289:SF0	MODERATE
BRCA2	Mmul_10	17	11336877	11336877	+	Missense_Mutation	SNP	G	G	C	rs288156087	22256	NORMAL	G	G	ENSMMUT00000010048	10/28	19	12	7	BRCA2,missense_variant,,ENSMMUT00000010048,;	C	ENSMMUG00000007197	ENSMMUT00000010048	Transcript	missense_variant	4525	4525	1509	E/Q	Gaa/Caa	rs288156087			1	BRCA2	VGNC		protein_coding	YES		ENSMMUP00000009432		F7ER68.62	UPI0012347DCA	10/28		PIRSF:PIRSF002397,PANTHER:PTHR11289,PANTHER:PTHR11289:SF0	MODERATE
BRCA2	Mmul_10	17	11336877	11336877	+	Missense_Mutation	SNP	G	G	C	rs288156087	23813	NORMAL	G	G	ENSMMUT00000010048	10/28	28	15	13	BRCA2,missense_variant,,ENSMMUT00000010048,;	C	ENSMMUG00000007197	ENSMMUT00000010048	Transcript	missense_variant	4525	4525	1509	E/Q	Gaa/Caa	rs288156087			1	BRCA2	VGNC		protein_coding	YES		ENSMMUP00000009432		F7ER68.62	UPI0012347DCA	10/28		PIRSF:PIRSF002397,PANTHER:PTHR11289,PANTHER:PTHR11289:SF0	MODERATE
BRCA2	Mmul_10	17	11336877	11336877	+	Missense_Mutation	SNP	G	G	C	rs288156087	27513	NORMAL	G	G	ENSMMUT00000010048	10/28	30	15	15	BRCA2,missense_variant,,ENSMMUT00000010048,;	C	ENSMMUG00000007197	ENSMMUT00000010048	Transcript	missense_variant	4525	4525	1509	E/Q	Gaa/Caa	rs288156087			1	BRCA2	VGNC		protein_coding	YES		ENSMMUP00000009432		F7ER68.62	UPI0012347DCA	10/28		PIRSF:PIRSF002397,PANTHER:PTHR11289,PANTHER:PTHR11289:SF0	MODERATE
BRCA2	Mmul_10	17	11336883	11336883	+	Missense_Mutation	SNP	C	C	T	novel	27536	NORMAL	C	C	ENSMMUT00000010048	10/28	31	14	17	BRCA2,missense_variant,,ENSMMUT00000010048,;	T	ENSMMUG00000007197	ENSMMUT00000010048	Transcript	missense_variant	4531	4531	1511	P/S	Ccc/Tcc				1	BRCA2	VGNC		protein_coding	YES		ENSMMUP00000009432		F7ER68.62	UPI0012347DCA	10/28		PIRSF:PIRSF002397,PANTHER:PTHR11289,PANTHER:PTHR11289:SF0	MODERATE
BRCA2	Mmul_10	17	11336884	11336884	+	Missense_Mutation	SNP	C	C	G	novel	27536	NORMAL	C	C	ENSMMUT00000010048	10/28	31	14	17	BRCA2,missense_variant,,ENSMMUT00000010048,;	G	ENSMMUG00000007197	ENSMMUT00000010048	Transcript	missense_variant	4532	4532	1511	P/R	cCc/cGc				1	BRCA2	VGNC		protein_coding	YES		ENSMMUP00000009432		F7ER68.62	UPI0012347DCA	10/28		PIRSF:PIRSF002397,PANTHER:PTHR11289,PANTHER:PTHR11289:SF0	MODERATE
BRCA2	Mmul_10	17	11336989	11336989	+	Missense_Mutation	SNP	T	T	G	rs1071516712	27536	NORMAL	T	T	ENSMMUT00000010048	10/28	35	23	12	BRCA2,missense_variant,,ENSMMUT00000010048,;	G	ENSMMUG00000007197	ENSMMUT00000010048	Transcript	missense_variant	4637	4637	1546	L/R	cTt/cGt	rs1071516712			1	BRCA2	VGNC		protein_coding	YES		ENSMMUP00000009432		F7ER68.62	UPI0012347DCA	10/28		Pfam:PF00634,PIRSF:PIRSF002397,PROSITE_profiles:PS50138,PANTHER:PTHR11289,PANTHER:PTHR11289:SF0	MODERATE
BRCA2	Mmul_10	17	11337283	11337283	+	Missense_Mutation	SNP	C	C	T	rs290071253	17893	NORMAL	C	C	ENSMMUT00000010048	10/28	25	17	8	BRCA2,missense_variant,,ENSMMUT00000010048,;	T	ENSMMUG00000007197	ENSMMUT00000010048	Transcript	missense_variant	4931	4931	1644	A/V	gCa/gTa	rs290071253			1	BRCA2	VGNC		protein_coding	YES		ENSMMUP00000009432		F7ER68.62	UPI0012347DCA	10/28		PIRSF:PIRSF002397,PANTHER:PTHR11289,PANTHER:PTHR11289:SF0	MODERATE
BRCA2	Mmul_10	17	11337283	11337283	+	Missense_Mutation	SNP	C	C	T	rs290071253	18087	NORMAL	C	C	ENSMMUT00000010048	10/28	21	15	6	BRCA2,missense_variant,,ENSMMUT00000010048,;	T	ENSMMUG00000007197	ENSMMUT00000010048	Transcript	missense_variant	4931	4931	1644	A/V	gCa/gTa	rs290071253			1	BRCA2	VGNC		protein_coding	YES		ENSMMUP00000009432		F7ER68.62	UPI0012347DCA	10/28		PIRSF:PIRSF002397,PANTHER:PTHR11289,PANTHER:PTHR11289:SF0	MODERATE
BRCA2	Mmul_10	17	11337283	11337283	+	Missense_Mutation	SNP	C	C	T	rs290071253	18095	NORMAL	C	C	ENSMMUT00000010048	10/28	12	9	3	BRCA2,missense_variant,,ENSMMUT00000010048,;	T	ENSMMUG00000007197	ENSMMUT00000010048	Transcript	missense_variant	4931	4931	1644	A/V	gCa/gTa	rs290071253			1	BRCA2	VGNC		protein_coding	YES		ENSMMUP00000009432		F7ER68.62	UPI0012347DCA	10/28		PIRSF:PIRSF002397,PANTHER:PTHR11289,PANTHER:PTHR11289:SF0	MODERATE
BRCA2	Mmul_10	17	11337283	11337283	+	Missense_Mutation	SNP	C	C	T	rs290071253	18122	NORMAL	C	C	ENSMMUT00000010048	10/28	26	14	12	BRCA2,missense_variant,,ENSMMUT00000010048,;	T	ENSMMUG00000007197	ENSMMUT00000010048	Transcript	missense_variant	4931	4931	1644	A/V	gCa/gTa	rs290071253			1	BRCA2	VGNC		protein_coding	YES		ENSMMUP00000009432		F7ER68.62	UPI0012347DCA	10/28		PIRSF:PIRSF002397,PANTHER:PTHR11289,PANTHER:PTHR11289:SF0	MODERATE
BRCA2	Mmul_10	17	11337283	11337283	+	Missense_Mutation	SNP	C	C	T	rs290071253	18133	NORMAL	C	C	ENSMMUT00000010048	10/28	33	20	13	BRCA2,missense_variant,,ENSMMUT00000010048,;	T	ENSMMUG00000007197	ENSMMUT00000010048	Transcript	missense_variant	4931	4931	1644	A/V	gCa/gTa	rs290071253			1	BRCA2	VGNC		protein_coding	YES		ENSMMUP00000009432		F7ER68.62	UPI0012347DCA	10/28		PIRSF:PIRSF002397,PANTHER:PTHR11289,PANTHER:PTHR11289:SF0	MODERATE
BRCA2	Mmul_10	17	11337283	11337283	+	Missense_Mutation	SNP	C	C	T	rs290071253	18147	NORMAL	C	C	ENSMMUT00000010048	10/28	15	8	7	BRCA2,missense_variant,,ENSMMUT00000010048,;	T	ENSMMUG00000007197	ENSMMUT00000010048	Transcript	missense_variant	4931	4931	1644	A/V	gCa/gTa	rs290071253			1	BRCA2	VGNC		protein_coding	YES		ENSMMUP00000009432		F7ER68.62	UPI0012347DCA	10/28		PIRSF:PIRSF002397,PANTHER:PTHR11289,PANTHER:PTHR11289:SF0	MODERATE
BRCA2	Mmul_10	17	11337283	11337283	+	Missense_Mutation	SNP	C	C	T	rs290071253	18167	NORMAL	C	C	ENSMMUT00000010048	10/28	16	8	8	BRCA2,missense_variant,,ENSMMUT00000010048,;	T	ENSMMUG00000007197	ENSMMUT00000010048	Transcript	missense_variant	4931	4931	1644	A/V	gCa/gTa	rs290071253			1	BRCA2	VGNC		protein_coding	YES		ENSMMUP00000009432		F7ER68.62	UPI0012347DCA	10/28		PIRSF:PIRSF002397,PANTHER:PTHR11289,PANTHER:PTHR11289:SF0	MODERATE
BRCA2	Mmul_10	17	11337283	11337283	+	Missense_Mutation	SNP	C	C	T	rs290071253	18206	NORMAL	C	C	ENSMMUT00000010048	10/28	25	11	14	BRCA2,missense_variant,,ENSMMUT00000010048,;	T	ENSMMUG00000007197	ENSMMUT00000010048	Transcript	missense_variant	4931	4931	1644	A/V	gCa/gTa	rs290071253			1	BRCA2	VGNC		protein_coding	YES		ENSMMUP00000009432		F7ER68.62	UPI0012347DCA	10/28		PIRSF:PIRSF002397,PANTHER:PTHR11289,PANTHER:PTHR11289:SF0	MODERATE
BRCA2	Mmul_10	17	11337283	11337283	+	Missense_Mutation	SNP	C	C	T	rs290071253	18216	NORMAL	C	C	ENSMMUT00000010048	10/28	31	15	16	BRCA2,missense_variant,,ENSMMUT00000010048,;	T	ENSMMUG00000007197	ENSMMUT00000010048	Transcript	missense_variant	4931	4931	1644	A/V	gCa/gTa	rs290071253			1	BRCA2	VGNC		protein_coding	YES		ENSMMUP00000009432		F7ER68.62	UPI0012347DCA	10/28		PIRSF:PIRSF002397,PANTHER:PTHR11289,PANTHER:PTHR11289:SF0	MODERATE
BRCA2	Mmul_10	17	11337283	11337283	+	Missense_Mutation	SNP	C	C	T	rs290071253	18607	NORMAL	C	C	ENSMMUT00000010048	10/28	25	16	9	BRCA2,missense_variant,,ENSMMUT00000010048,;	T	ENSMMUG00000007197	ENSMMUT00000010048	Transcript	missense_variant	4931	4931	1644	A/V	gCa/gTa	rs290071253			1	BRCA2	VGNC		protein_coding	YES		ENSMMUP00000009432		F7ER68.62	UPI0012347DCA	10/28		PIRSF:PIRSF002397,PANTHER:PTHR11289,PANTHER:PTHR11289:SF0	MODERATE
BRCA2	Mmul_10	17	11337283	11337283	+	Missense_Mutation	SNP	C	C	T	rs290071253	21742	NORMAL	C	C	ENSMMUT00000010048	10/28	20	9	11	BRCA2,missense_variant,,ENSMMUT00000010048,;	T	ENSMMUG00000007197	ENSMMUT00000010048	Transcript	missense_variant	4931	4931	1644	A/V	gCa/gTa	rs290071253			1	BRCA2	VGNC		protein_coding	YES		ENSMMUP00000009432		F7ER68.62	UPI0012347DCA	10/28		PIRSF:PIRSF002397,PANTHER:PTHR11289,PANTHER:PTHR11289:SF0	MODERATE
BRCA2	Mmul_10	17	11337283	11337283	+	Missense_Mutation	SNP	C	C	T	rs290071253	22523	NORMAL	C	C	ENSMMUT00000010048	10/28	22	13	9	BRCA2,missense_variant,,ENSMMUT00000010048,;	T	ENSMMUG00000007197	ENSMMUT00000010048	Transcript	missense_variant	4931	4931	1644	A/V	gCa/gTa	rs290071253			1	BRCA2	VGNC		protein_coding	YES		ENSMMUP00000009432		F7ER68.62	UPI0012347DCA	10/28		PIRSF:PIRSF002397,PANTHER:PTHR11289,PANTHER:PTHR11289:SF0	MODERATE
BRCA2	Mmul_10	17	11337283	11337283	+	Missense_Mutation	SNP	C	C	T	rs290071253	25329	NORMAL	C	C	ENSMMUT00000010048	10/28	20	9	11	BRCA2,missense_variant,,ENSMMUT00000010048,;	T	ENSMMUG00000007197	ENSMMUT00000010048	Transcript	missense_variant	4931	4931	1644	A/V	gCa/gTa	rs290071253			1	BRCA2	VGNC		protein_coding	YES		ENSMMUP00000009432		F7ER68.62	UPI0012347DCA	10/28		PIRSF:PIRSF002397,PANTHER:PTHR11289,PANTHER:PTHR11289:SF0	MODERATE
BRCA2	Mmul_10	17	11337283	11337283	+	Missense_Mutation	SNP	C	C	T	rs290071253	25856	NORMAL	C	C	ENSMMUT00000010048	10/28	39	22	17	BRCA2,missense_variant,,ENSMMUT00000010048,;	T	ENSMMUG00000007197	ENSMMUT00000010048	Transcript	missense_variant	4931	4931	1644	A/V	gCa/gTa	rs290071253			1	BRCA2	VGNC		protein_coding	YES		ENSMMUP00000009432		F7ER68.62	UPI0012347DCA	10/28		PIRSF:PIRSF002397,PANTHER:PTHR11289,PANTHER:PTHR11289:SF0	MODERATE
BRCA2	Mmul_10	17	11337283	11337283	+	Missense_Mutation	SNP	C	C	T	rs290071253	25891	NORMAL	C	C	ENSMMUT00000010048	10/28	22	8	14	BRCA2,missense_variant,,ENSMMUT00000010048,;	T	ENSMMUG00000007197	ENSMMUT00000010048	Transcript	missense_variant	4931	4931	1644	A/V	gCa/gTa	rs290071253			1	BRCA2	VGNC		protein_coding	YES		ENSMMUP00000009432		F7ER68.62	UPI0012347DCA	10/28		PIRSF:PIRSF002397,PANTHER:PTHR11289,PANTHER:PTHR11289:SF0	MODERATE
BRCA2	Mmul_10	17	11337283	11337283	+	Missense_Mutation	SNP	C	C	T	rs290071253	26851	NORMAL	C	C	ENSMMUT00000010048	10/28	17	8	9	BRCA2,missense_variant,,ENSMMUT00000010048,;	T	ENSMMUG00000007197	ENSMMUT00000010048	Transcript	missense_variant	4931	4931	1644	A/V	gCa/gTa	rs290071253			1	BRCA2	VGNC		protein_coding	YES		ENSMMUP00000009432		F7ER68.62	UPI0012347DCA	10/28		PIRSF:PIRSF002397,PANTHER:PTHR11289,PANTHER:PTHR11289:SF0	MODERATE
BRCA2	Mmul_10	17	11337283	11337283	+	Missense_Mutation	SNP	C	C	T	rs290071253	27513	NORMAL	C	C	ENSMMUT00000010048	10/28	33	18	15	BRCA2,missense_variant,,ENSMMUT00000010048,;	T	ENSMMUG00000007197	ENSMMUT00000010048	Transcript	missense_variant	4931	4931	1644	A/V	gCa/gTa	rs290071253			1	BRCA2	VGNC		protein_coding	YES		ENSMMUP00000009432		F7ER68.62	UPI0012347DCA	10/28		PIRSF:PIRSF002397,PANTHER:PTHR11289,PANTHER:PTHR11289:SF0	MODERATE
BRCA2	Mmul_10	17	11337283	11337283	+	Missense_Mutation	SNP	C	C	T	rs290071253	27516	NORMAL	C	C	ENSMMUT00000010048	10/28	16	10	6	BRCA2,missense_variant,,ENSMMUT00000010048,;	T	ENSMMUG00000007197	ENSMMUT00000010048	Transcript	missense_variant	4931	4931	1644	A/V	gCa/gTa	rs290071253			1	BRCA2	VGNC		protein_coding	YES		ENSMMUP00000009432		F7ER68.62	UPI0012347DCA	10/28		PIRSF:PIRSF002397,PANTHER:PTHR11289,PANTHER:PTHR11289:SF0	MODERATE
BRCA2	Mmul_10	17	11337283	11337283	+	Missense_Mutation	SNP	C	C	T	rs290071253	30325	NORMAL	C	C	ENSMMUT00000010048	10/28	12	4	8	BRCA2,missense_variant,,ENSMMUT00000010048,;	T	ENSMMUG00000007197	ENSMMUT00000010048	Transcript	missense_variant	4931	4931	1644	A/V	gCa/gTa	rs290071253			1	BRCA2	VGNC		protein_coding	YES		ENSMMUP00000009432		F7ER68.62	UPI0012347DCA	10/28		PIRSF:PIRSF002397,PANTHER:PTHR11289,PANTHER:PTHR11289:SF0	MODERATE
BRCA2	Mmul_10	17	11337283	11337283	+	Missense_Mutation	SNP	C	T	T	rs290071253	22435	NORMAL	C	C	ENSMMUT00000010048	10/28	22	2	20	BRCA2,missense_variant,,ENSMMUT00000010048,;	T	ENSMMUG00000007197	ENSMMUT00000010048	Transcript	missense_variant	4931	4931	1644	A/V	gCa/gTa	rs290071253			1	BRCA2	VGNC		protein_coding	YES		ENSMMUP00000009432		F7ER68.62	UPI0012347DCA	10/28		PIRSF:PIRSF002397,PANTHER:PTHR11289,PANTHER:PTHR11289:SF0	MODERATE
BRCA2	Mmul_10	17	11338069	11338069	+	Missense_Mutation	SNP	A	A	G	novel	27536	NORMAL	A	A	ENSMMUT00000010048	10/28	23	14	9	BRCA2,missense_variant,,ENSMMUT00000010048,;	G	ENSMMUG00000007197	ENSMMUT00000010048	Transcript	missense_variant	5717	5717	1906	H/R	cAt/cGt				1	BRCA2	VGNC		protein_coding	YES		ENSMMUP00000009432		F7ER68.62	UPI0012347DCA	10/28		PIRSF:PIRSF002397,PANTHER:PTHR11289,PANTHER:PTHR11289:SF0	MODERATE
BRCA2	Mmul_10	17	11338098	11338098	+	Missense_Mutation	SNP	A	A	G	novel	27151	NORMAL	A	A	ENSMMUT00000010048	10/28	27	9	18	BRCA2,missense_variant,,ENSMMUT00000010048,;	G	ENSMMUG00000007197	ENSMMUT00000010048	Transcript	missense_variant	5746	5746	1916	M/V	Atg/Gtg				1	BRCA2	VGNC		protein_coding	YES		ENSMMUP00000009432		F7ER68.62	UPI0012347DCA	10/28		PIRSF:PIRSF002397,PANTHER:PTHR11289,PANTHER:PTHR11289:SF0	MODERATE
BRCA2	Mmul_10	17	11338647	11338647	+	Missense_Mutation	SNP	A	A	G	rs1066912906	18008	NORMAL	A	A	ENSMMUT00000010048	10/28	22	14	8	BRCA2,missense_variant,,ENSMMUT00000010048,;	G	ENSMMUG00000007197	ENSMMUT00000010048	Transcript	missense_variant	6295	6295	2099	T/A	Aca/Gca	rs1066912906			1	BRCA2	VGNC		protein_coding	YES		ENSMMUP00000009432		F7ER68.62	UPI0012347DCA	10/28		PIRSF:PIRSF002397,PANTHER:PTHR11289,PANTHER:PTHR11289:SF0	MODERATE
BRCA2	Mmul_10	17	11338647	11338647	+	Missense_Mutation	SNP	A	A	G	rs1066912906	21847	NORMAL	A	A	ENSMMUT00000010048	10/28	18	8	10	BRCA2,missense_variant,,ENSMMUT00000010048,;	G	ENSMMUG00000007197	ENSMMUT00000010048	Transcript	missense_variant	6295	6295	2099	T/A	Aca/Gca	rs1066912906			1	BRCA2	VGNC		protein_coding	YES		ENSMMUP00000009432		F7ER68.62	UPI0012347DCA	10/28		PIRSF:PIRSF002397,PANTHER:PTHR11289,PANTHER:PTHR11289:SF0	MODERATE
BRCA2	Mmul_10	17	11338647	11338647	+	Missense_Mutation	SNP	A	A	G	rs1066912906	25891	NORMAL	A	A	ENSMMUT00000010048	10/28	21	11	10	BRCA2,missense_variant,,ENSMMUT00000010048,;	G	ENSMMUG00000007197	ENSMMUT00000010048	Transcript	missense_variant	6295	6295	2099	T/A	Aca/Gca	rs1066912906			1	BRCA2	VGNC		protein_coding	YES		ENSMMUP00000009432		F7ER68.62	UPI0012347DCA	10/28		PIRSF:PIRSF002397,PANTHER:PTHR11289,PANTHER:PTHR11289:SF0	MODERATE
BRCA2	Mmul_10	17	11338796	11338801	+	In_Frame_Del	DEL	TCACTC	-	-	novel	17686	NORMAL	TCACTC	TCACTC	ENSMMUT00000010048	10/28	32	0	32	BRCA2,inframe_deletion,,ENSMMUT00000010048,;	-	ENSMMUG00000007197	ENSMMUT00000010048	Transcript	inframe_deletion	6444-6449	6444-6449	2148-2150	NHS/N	aaTCACTCt/aat				1	BRCA2	VGNC		protein_coding	YES		ENSMMUP00000009432		F7ER68.62	UPI0012347DCA	10/28		PIRSF:PIRSF002397,PANTHER:PTHR11289,PANTHER:PTHR11289:SF0	MODERATE
BRCA2	Mmul_10	17	11338796	11338801	+	In_Frame_Del	DEL	TCACTC	-	-	novel	17694	NORMAL	TCACTC	TCACTC	ENSMMUT00000010048	10/28	22	0	22	BRCA2,inframe_deletion,,ENSMMUT00000010048,;	-	ENSMMUG00000007197	ENSMMUT00000010048	Transcript	inframe_deletion	6444-6449	6444-6449	2148-2150	NHS/N	aaTCACTCt/aat				1	BRCA2	VGNC		protein_coding	YES		ENSMMUP00000009432		F7ER68.62	UPI0012347DCA	10/28		PIRSF:PIRSF002397,PANTHER:PTHR11289,PANTHER:PTHR11289:SF0	MODERATE
BRCA2	Mmul_10	17	11338796	11338801	+	In_Frame_Del	DEL	TCACTC	-	-	novel	17857	NORMAL	TCACTC	TCACTC	ENSMMUT00000010048	10/28	35	0	35	BRCA2,inframe_deletion,,ENSMMUT00000010048,;	-	ENSMMUG00000007197	ENSMMUT00000010048	Transcript	inframe_deletion	6444-6449	6444-6449	2148-2150	NHS/N	aaTCACTCt/aat				1	BRCA2	VGNC		protein_coding	YES		ENSMMUP00000009432		F7ER68.62	UPI0012347DCA	10/28		PIRSF:PIRSF002397,PANTHER:PTHR11289,PANTHER:PTHR11289:SF0	MODERATE
BRCA2	Mmul_10	17	11338796	11338801	+	In_Frame_Del	DEL	TCACTC	-	-	novel	18090	NORMAL	TCACTC	TCACTC	ENSMMUT00000010048	10/28	28	0	28	BRCA2,inframe_deletion,,ENSMMUT00000010048,;	-	ENSMMUG00000007197	ENSMMUT00000010048	Transcript	inframe_deletion	6444-6449	6444-6449	2148-2150	NHS/N	aaTCACTCt/aat				1	BRCA2	VGNC		protein_coding	YES		ENSMMUP00000009432		F7ER68.62	UPI0012347DCA	10/28		PIRSF:PIRSF002397,PANTHER:PTHR11289,PANTHER:PTHR11289:SF0	MODERATE
BRCA2	Mmul_10	17	11338796	11338801	+	In_Frame_Del	DEL	TCACTC	-	-	novel	18200	NORMAL	TCACTC	TCACTC	ENSMMUT00000010048	10/28	31	0	31	BRCA2,inframe_deletion,,ENSMMUT00000010048,;	-	ENSMMUG00000007197	ENSMMUT00000010048	Transcript	inframe_deletion	6444-6449	6444-6449	2148-2150	NHS/N	aaTCACTCt/aat				1	BRCA2	VGNC		protein_coding	YES		ENSMMUP00000009432		F7ER68.62	UPI0012347DCA	10/28		PIRSF:PIRSF002397,PANTHER:PTHR11289,PANTHER:PTHR11289:SF0	MODERATE
BRCA2	Mmul_10	17	11338796	11338801	+	In_Frame_Del	DEL	TCACTC	-	-	novel	18208	NORMAL	TCACTC	TCACTC	ENSMMUT00000010048	10/28	21	0	21	BRCA2,inframe_deletion,,ENSMMUT00000010048,;	-	ENSMMUG00000007197	ENSMMUT00000010048	Transcript	inframe_deletion	6444-6449	6444-6449	2148-2150	NHS/N	aaTCACTCt/aat				1	BRCA2	VGNC		protein_coding	YES		ENSMMUP00000009432		F7ER68.62	UPI0012347DCA	10/28		PIRSF:PIRSF002397,PANTHER:PTHR11289,PANTHER:PTHR11289:SF0	MODERATE
BRCA2	Mmul_10	17	11338796	11338801	+	In_Frame_Del	DEL	TCACTC	-	-	novel	18241	NORMAL	TCACTC	TCACTC	ENSMMUT00000010048	10/28	13	0	13	BRCA2,inframe_deletion,,ENSMMUT00000010048,;	-	ENSMMUG00000007197	ENSMMUT00000010048	Transcript	inframe_deletion	6444-6449	6444-6449	2148-2150	NHS/N	aaTCACTCt/aat				1	BRCA2	VGNC		protein_coding	YES		ENSMMUP00000009432		F7ER68.62	UPI0012347DCA	10/28		PIRSF:PIRSF002397,PANTHER:PTHR11289,PANTHER:PTHR11289:SF0	MODERATE
BRCA2	Mmul_10	17	11338796	11338801	+	In_Frame_Del	DEL	TCACTC	-	-	novel	21847	NORMAL	TCACTC	TCACTC	ENSMMUT00000010048	10/28	29	0	29	BRCA2,inframe_deletion,,ENSMMUT00000010048,;	-	ENSMMUG00000007197	ENSMMUT00000010048	Transcript	inframe_deletion	6444-6449	6444-6449	2148-2150	NHS/N	aaTCACTCt/aat				1	BRCA2	VGNC		protein_coding	YES		ENSMMUP00000009432		F7ER68.62	UPI0012347DCA	10/28		PIRSF:PIRSF002397,PANTHER:PTHR11289,PANTHER:PTHR11289:SF0	MODERATE
BRCA2	Mmul_10	17	11338796	11338801	+	In_Frame_Del	DEL	TCACTC	-	-	novel	23665	NORMAL	TCACTC	TCACTC	ENSMMUT00000010048	10/28	26	0	26	BRCA2,inframe_deletion,,ENSMMUT00000010048,;	-	ENSMMUG00000007197	ENSMMUT00000010048	Transcript	inframe_deletion	6444-6449	6444-6449	2148-2150	NHS/N	aaTCACTCt/aat				1	BRCA2	VGNC		protein_coding	YES		ENSMMUP00000009432		F7ER68.62	UPI0012347DCA	10/28		PIRSF:PIRSF002397,PANTHER:PTHR11289,PANTHER:PTHR11289:SF0	MODERATE
BRCA2	Mmul_10	17	11338796	11338801	+	In_Frame_Del	DEL	TCACTC	-	-	novel	23813	NORMAL	TCACTC	TCACTC	ENSMMUT00000010048	10/28	22	0	22	BRCA2,inframe_deletion,,ENSMMUT00000010048,;	-	ENSMMUG00000007197	ENSMMUT00000010048	Transcript	inframe_deletion	6444-6449	6444-6449	2148-2150	NHS/N	aaTCACTCt/aat				1	BRCA2	VGNC		protein_coding	YES		ENSMMUP00000009432		F7ER68.62	UPI0012347DCA	10/28		PIRSF:PIRSF002397,PANTHER:PTHR11289,PANTHER:PTHR11289:SF0	MODERATE
BRCA2	Mmul_10	17	11338796	11338801	+	In_Frame_Del	DEL	TCACTC	-	-	novel	23903	NORMAL	TCACTC	TCACTC	ENSMMUT00000010048	10/28	28	0	28	BRCA2,inframe_deletion,,ENSMMUT00000010048,;	-	ENSMMUG00000007197	ENSMMUT00000010048	Transcript	inframe_deletion	6444-6449	6444-6449	2148-2150	NHS/N	aaTCACTCt/aat				1	BRCA2	VGNC		protein_coding	YES		ENSMMUP00000009432		F7ER68.62	UPI0012347DCA	10/28		PIRSF:PIRSF002397,PANTHER:PTHR11289,PANTHER:PTHR11289:SF0	MODERATE
BRCA2	Mmul_10	17	11338796	11338801	+	In_Frame_Del	DEL	TCACTC	-	-	novel	30186	NORMAL	TCACTC	TCACTC	ENSMMUT00000010048	10/28	33	0	33	BRCA2,inframe_deletion,,ENSMMUT00000010048,;	-	ENSMMUG00000007197	ENSMMUT00000010048	Transcript	inframe_deletion	6444-6449	6444-6449	2148-2150	NHS/N	aaTCACTCt/aat				1	BRCA2	VGNC		protein_coding	YES		ENSMMUP00000009432		F7ER68.62	UPI0012347DCA	10/28		PIRSF:PIRSF002397,PANTHER:PTHR11289,PANTHER:PTHR11289:SF0	MODERATE
BRCA2	Mmul_10	17	11338796	11338801	+	In_Frame_Del	DEL	TCACTC	TCACTC	-	novel	17745	NORMAL	TCACTC	TCACTC	ENSMMUT00000010048	10/28	18	6	12	BRCA2,inframe_deletion,,ENSMMUT00000010048,;	-	ENSMMUG00000007197	ENSMMUT00000010048	Transcript	inframe_deletion	6444-6449	6444-6449	2148-2150	NHS/N	aaTCACTCt/aat				1	BRCA2	VGNC		protein_coding	YES		ENSMMUP00000009432		F7ER68.62	UPI0012347DCA	10/28		PIRSF:PIRSF002397,PANTHER:PTHR11289,PANTHER:PTHR11289:SF0	MODERATE
BRCA2	Mmul_10	17	11338796	11338801	+	In_Frame_Del	DEL	TCACTC	TCACTC	-	novel	17874	NORMAL	TCACTC	TCACTC	ENSMMUT00000010048	10/28	26	7	19	BRCA2,inframe_deletion,,ENSMMUT00000010048,;	-	ENSMMUG00000007197	ENSMMUT00000010048	Transcript	inframe_deletion	6444-6449	6444-6449	2148-2150	NHS/N	aaTCACTCt/aat				1	BRCA2	VGNC		protein_coding	YES		ENSMMUP00000009432		F7ER68.62	UPI0012347DCA	10/28		PIRSF:PIRSF002397,PANTHER:PTHR11289,PANTHER:PTHR11289:SF0	MODERATE
BRCA2	Mmul_10	17	11338796	11338801	+	In_Frame_Del	DEL	TCACTC	TCACTC	-	novel	17893	NORMAL	TCACTC	TCACTC	ENSMMUT00000010048	10/28	24	10	14	BRCA2,inframe_deletion,,ENSMMUT00000010048,;	-	ENSMMUG00000007197	ENSMMUT00000010048	Transcript	inframe_deletion	6444-6449	6444-6449	2148-2150	NHS/N	aaTCACTCt/aat				1	BRCA2	VGNC		protein_coding	YES		ENSMMUP00000009432		F7ER68.62	UPI0012347DCA	10/28		PIRSF:PIRSF002397,PANTHER:PTHR11289,PANTHER:PTHR11289:SF0	MODERATE
BRCA2	Mmul_10	17	11338796	11338801	+	In_Frame_Del	DEL	TCACTC	TCACTC	-	novel	17943	NORMAL	TCACTC	TCACTC	ENSMMUT00000010048	10/28	31	14	17	BRCA2,inframe_deletion,,ENSMMUT00000010048,;	-	ENSMMUG00000007197	ENSMMUT00000010048	Transcript	inframe_deletion	6444-6449	6444-6449	2148-2150	NHS/N	aaTCACTCt/aat				1	BRCA2	VGNC		protein_coding	YES		ENSMMUP00000009432		F7ER68.62	UPI0012347DCA	10/28		PIRSF:PIRSF002397,PANTHER:PTHR11289,PANTHER:PTHR11289:SF0	MODERATE
BRCA2	Mmul_10	17	11338796	11338801	+	In_Frame_Del	DEL	TCACTC	TCACTC	-	novel	17968	NORMAL	TCACTC	TCACTC	ENSMMUT00000010048	10/28	23	6	17	BRCA2,inframe_deletion,,ENSMMUT00000010048,;	-	ENSMMUG00000007197	ENSMMUT00000010048	Transcript	inframe_deletion	6444-6449	6444-6449	2148-2150	NHS/N	aaTCACTCt/aat				1	BRCA2	VGNC		protein_coding	YES		ENSMMUP00000009432		F7ER68.62	UPI0012347DCA	10/28		PIRSF:PIRSF002397,PANTHER:PTHR11289,PANTHER:PTHR11289:SF0	MODERATE
BRCA2	Mmul_10	17	11338796	11338801	+	In_Frame_Del	DEL	TCACTC	TCACTC	-	novel	17979	NORMAL	TCACTC	TCACTC	ENSMMUT00000010048	10/28	29	9	20	BRCA2,inframe_deletion,,ENSMMUT00000010048,;	-	ENSMMUG00000007197	ENSMMUT00000010048	Transcript	inframe_deletion	6444-6449	6444-6449	2148-2150	NHS/N	aaTCACTCt/aat				1	BRCA2	VGNC		protein_coding	YES		ENSMMUP00000009432		F7ER68.62	UPI0012347DCA	10/28		PIRSF:PIRSF002397,PANTHER:PTHR11289,PANTHER:PTHR11289:SF0	MODERATE
BRCA2	Mmul_10	17	11338796	11338801	+	In_Frame_Del	DEL	TCACTC	TCACTC	-	novel	18008	NORMAL	TCACTC	TCACTC	ENSMMUT00000010048	10/28	33	20	13	BRCA2,inframe_deletion,,ENSMMUT00000010048,;	-	ENSMMUG00000007197	ENSMMUT00000010048	Transcript	inframe_deletion	6444-6449	6444-6449	2148-2150	NHS/N	aaTCACTCt/aat				1	BRCA2	VGNC		protein_coding	YES		ENSMMUP00000009432		F7ER68.62	UPI0012347DCA	10/28		PIRSF:PIRSF002397,PANTHER:PTHR11289,PANTHER:PTHR11289:SF0	MODERATE
BRCA2	Mmul_10	17	11338796	11338801	+	In_Frame_Del	DEL	TCACTC	TCACTC	-	novel	18022	NORMAL	TCACTC	TCACTC	ENSMMUT00000010048	10/28	35	26	9	BRCA2,inframe_deletion,,ENSMMUT00000010048,;	-	ENSMMUG00000007197	ENSMMUT00000010048	Transcript	inframe_deletion	6444-6449	6444-6449	2148-2150	NHS/N	aaTCACTCt/aat				1	BRCA2	VGNC		protein_coding	YES		ENSMMUP00000009432		F7ER68.62	UPI0012347DCA	10/28		PIRSF:PIRSF002397,PANTHER:PTHR11289,PANTHER:PTHR11289:SF0	MODERATE
BRCA2	Mmul_10	17	11338796	11338801	+	In_Frame_Del	DEL	TCACTC	TCACTC	-	novel	18057	NORMAL	TCACTC	TCACTC	ENSMMUT00000010048	10/28	23	10	13	BRCA2,inframe_deletion,,ENSMMUT00000010048,;	-	ENSMMUG00000007197	ENSMMUT00000010048	Transcript	inframe_deletion	6444-6449	6444-6449	2148-2150	NHS/N	aaTCACTCt/aat				1	BRCA2	VGNC		protein_coding	YES		ENSMMUP00000009432		F7ER68.62	UPI0012347DCA	10/28		PIRSF:PIRSF002397,PANTHER:PTHR11289,PANTHER:PTHR11289:SF0	MODERATE
[truncated: 3,088 more rows]
[truncated: 6 more columns]

## Sheet: Supplementary Table 5
Hugo_Symbol	NCBI_Build	Chromosome	Start_Position	End_Position	Strand	Variant_Classification	Variant_Type	Reference_Allele	Tumor_Seq_Allele1	Tumor_Seq_Allele2	dbSNP_RS	SampleID	Matched_Norm_Sample_Barcode	Match_Norm_Seq_Allele1	Match_Norm_Seq_Allele2	Transcript_ID	Exon_Number	t_depth	t_ref_count	t_alt_count	all_effects	Allele	Gene	Feature	Feature_type	Consequence	cDNA_position	CDS_position	Protein_position	Amino_acids	Codons	Existing_variation	ALLELE_NUM	DISTANCE	STRAND_VEP	SYMBOL	SYMBOL_SOURCE	HGNC_ID	BIOTYPE	CANONICAL	CCDS	ENSP	SWISSPROT	TREMBL	UNIPARC	EXON	INTRON	DOMAINS	IMPACT
[truncated: 298 more rows]
[truncated: 7 more columns]

[truncated: 3 more sheets: Supplementary Table 6, Supplementary Table 7, Supplementary Table 8]
