# Supplementary material for: A naturally occurring variant of MBD4 causes maternal germline hypermutation in primates
Source: HighWire-hosted journal article supplement (doi:10.1101/gr.277977.123), 2023-11-20
Supplement: Supplemental__Figure_S1.pdf [file Supplemental__Figure_S1.pdf]

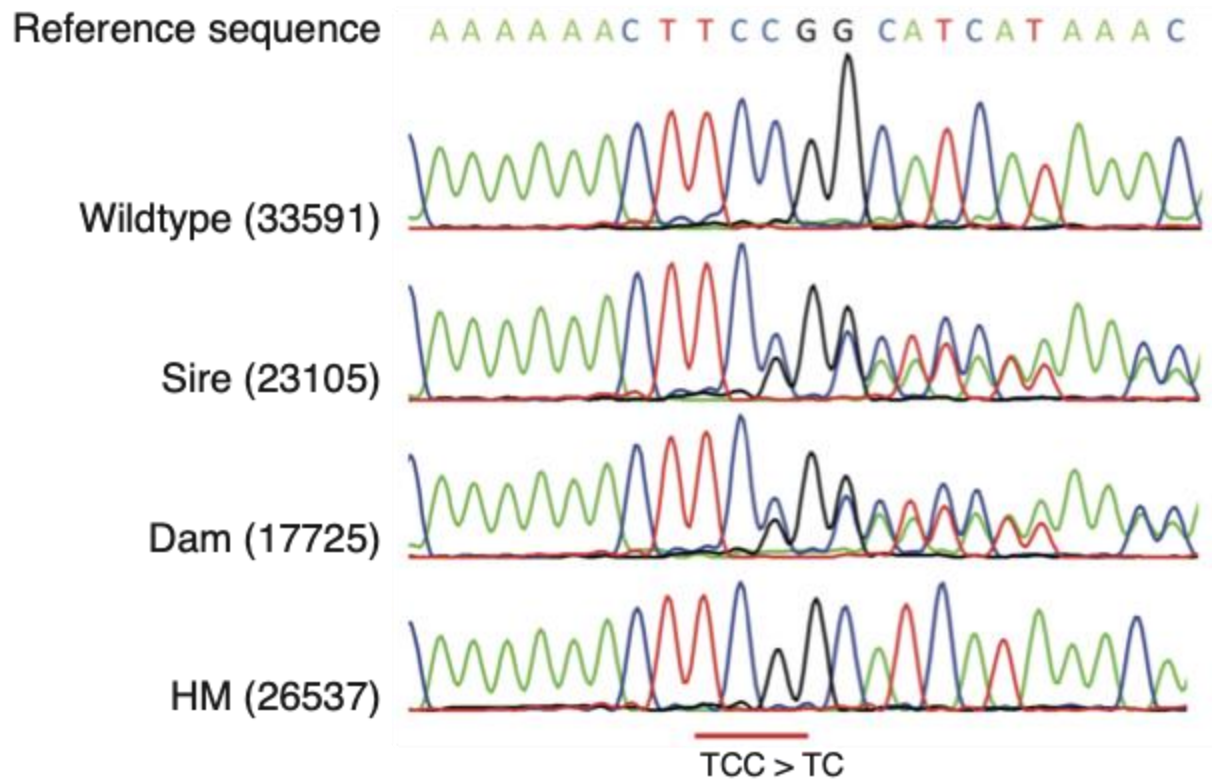

**Figure S1. Sanger Validation of mutation.** Sanger validation of the frameshift indicates germline inheritance from both parents of 26537. HM= hypermutator. Sire and Dam are parents of 26537.
